# Supplementary material
Source: publisher figshare collection journal article supplement (https://acs.figshare.com/ndownloader/files/22775543)
Supplement: Supplementary file 1 [file 22775543]

## Sheet: LFQ intensities
Supproting Data 3. log2LFQ intenties for all sample without block correction from a single MaxQuant run of samples in all six blocks
		Block 1																				Block 2																				Block 3
Protein	Protein Description	Control				SiO2_Low				SiO2_High				AgSiO2_Low				AgSiO2_High				Control				AgSiO2_10p_Low				AgSiO2_10p_High				Ag_20nm_Low				Ag_20nm_High				Control				AgCit_Low
		Rep1	Rep2	Rep3	Rep4	Rep1	Rep2	Rep3	Rep4	Rep1	Rep2	Rep3	Rep4	Rep1	Rep2	Rep3	Rep4	Rep1	Rep2	Rep3	Rep4	Rep1	Rep2	Rep3	Rep4	Rep1	Rep2	Rep3	Rep4	Rep1	Rep2	Rep3	Rep4	Rep1	Rep2	Rep3	Rep4	Rep1	Rep2	Rep3	Rep4	Rep1	Rep2	Rep3	Rep4	Rep1	Rep2	Rep3	Rep4
1433B_HUMAN	14-3-3 protein beta/alpha	32.2061	32.131	32.248	32.3591	32.129	31.9226	32.2129	32.3148	31.9134	32.1133	32.1755	31.9888	32.1195	32.335	32.363	32.2245	32.1089	32.153	32.4206	32.2634	31.9626	32.1187	31.8743	32.0563	31.8677	31.9284	32.1433	32.27	31.8457	31.8882	32.3099	31.7502	31.7248	32.1304	32.1335	32.2427	31.8546	31.937	32.0902	31.9905	32.4654	32.318	32.3779	32.3297	32.3894	32.3053	32.3259	32.5374
1433E_HUMAN	14-3-3 protein epsilon	32.1394	32.2995	32.3086	32.4023	32.0851	32.1312	32.4372	32.4737	31.9781	32.2247	32.5287	32.2304	32.2368	32.4375	32.4308	32.3322	32.2151	32.2807	32.2456	32.2873	32.4228	32.3921	32.3179	32.3832	32.2853	32.3615	32.4307	32.574	32.1146	32.3208	32.5084	32.2907	32.142	32.4237	32.5156	32.6087	32.238	32.2719	32.4569	32.3483	32.4311	32.4271	32.3261	32.372	32.489	32.3263	32.4236	32.4149
1433F_HUMAN	14-3-3 protein eta	31.0093	30.9305	30.9786	30.9799	30.9267	30.7877	30.9771	30.9409	30.7239	30.769	30.7229	30.9314	30.8869	31.0762	31.0068	30.843	30.8028	30.8926	31.0441	30.9715	30.7664	30.8711	30.769	30.6412	30.3511	30.6397	30.7133	31.0001	30.5431	30.5872	30.9878	30.4884	30.6043	30.6233	30.7999	30.8363	30.5299	30.8192	30.9153	30.7785	31.0454	31.1878	31.1871	31.0615	30.8989	30.7718	30.962	30.6937
1433G_HUMAN	14-3-3 protein gamma	32.7346	32.5168	32.5797	32.9008	32.5328	32.4915	32.5136	32.7261	32.1918	32.5345	32.5213	32.6025	32.5917	32.662	32.7869	32.5437	32.6278	32.6096	32.4929	32.6643	32.396	32.4784	32.3406	32.4675	32.2465	32.1906	32.362	32.3835	32.3071	32.328	32.6012	32.1682	32.2375	32.3707	32.6496	32.5044	32.1305	32.4615	32.541	32.4417	32.6467	32.7801	32.666	32.7823	32.5003	32.6124	32.7646	32.7665
1433T_HUMAN	14-3-3 protein theta	32.0927	31.9322	31.9389	32.068	31.7337	31.708	32.1348	31.9819	31.6175	31.7635	31.9695	31.9049	31.9486	31.9259	32.1113	32.0587	31.7873	31.9478	32.0302	32.1563	31.8324	31.9812	31.7482	31.9612	31.7621	31.8928	32.0388	32.0631	31.7705	31.7065	32.1945	31.7323	31.6251	31.9867	31.9317	31.9693	31.8042	31.8654	32.0422	32.0368	32.1802	32.1164	32.194	32.0041	32.1089	32.0153	32.2779	32.2055
1433Z_HUMAN	14-3-3 protein zeta/delta	34.762	34.6363	34.7568	34.9562	34.5222	34.5003	34.7519	34.7843	34.3872	34.5289	34.7671	34.7142	34.5557	34.803	34.7405	34.7189	34.5846	34.6846	34.7826	34.757	34.764	34.7235	34.6052	34.6783	34.4763	34.5855	34.7017	34.8789	34.4232	34.6087	34.8159	34.5125	34.3918	34.6826	34.7153	34.7466	34.4625	34.6838	34.6823	34.6895	34.8689	34.9074	34.8345	34.7563	34.7521	34.6562	34.8635	34.8105
2A5D_HUMAN	Serine/threonine-protein phosphatase 2A 56 kDa regulatory subunit delta isoform	28.1625	28.1707	28.003	28.121	28.0066	27.8724	28.2996	28.8038	28.0068	28.053	28.3589	27.9573	28.4535	28.5985	28.1371	29.4916	27.8795	28.1153	28.6089	28.0729	28.1255	28.2183	28.3052	28.1963	28.1018	27.876	28.2656	28.2927	28.0612	28.1901	28.2477	27.5975	28.018	28.1875	28.1754	28.3407	27.5639	27.9512	28.0254	28.0765	27.7509	28.1327	27.9277	28.0452	27.9879	28.1449	28.445	28.1313
2A5G_HUMAN	Serine/threonine-protein phosphatase 2A 56 kDa regulatory subunit gamma isoform	26.1854	25.8938	26.1457	26.1631	26.3052	25.437	25.8862	26.4563	26.4481	25.5653	26.0977	26.316	25.9219	25.5807	25.8191	NA	26.0606	26.048	26.3656	26.1949	26.6978	26.3122	26.2737	26.4782	26.3573	26.5394	26.7179	26.1104	26.2256	26.3288	25.5839	26.1508	26.1522	26.5029	25.9576	26.5569	25.8427	26.3155	26.4268	26.4154	25.6464	26.1239	25.9121	26.5268	25.6046	25.6899	NA	26.4994
2AAA_HUMAN	Serine/threonine-protein phosphatase 2A 65 kDa regulatory subunit A alpha isoform	32.7629	32.8275	32.8092	32.831	32.6754	32.732	32.9778	32.9205	32.6169	32.7462	32.6458	32.6442	32.8701	32.9202	32.9827	32.6614	32.6864	32.7141	32.8389	32.7824	32.8359	32.9264	32.8372	32.8386	32.8094	32.8465	32.8794	33.0218	32.7538	32.7919	32.8719	32.7635	32.7824	32.9454	32.8763	32.9601	32.7011	32.7527	32.9436	32.7146	32.8584	32.9618	32.8691	32.8373	32.8259	32.8669	32.7245	33.02
2AAB_HUMAN	Serine/threonine-protein phosphatase 2A 65 kDa regulatory subunit A beta isoform	26.5326	26.2758	26.3443	26.2653	26.8147	26.1632	26.7396	26.6983	26.4128	26.421	26.2937	26.4659	26.9119	26.332	26.8453	25.9941	26.8008	26.5365	26.4159	26.3525	26.6119	26.75	26.8802	26.4773	26.8529	26.8758	26.9745	27.526	26.7432	26.6022	26.3666	26.5002	26.3806	27.3161	27.1876	26.528	26.4443	26.8227	26.4948	26.6349	26.2691	26.6941	26.5862	27.2645	26.073	27.7674	26.4715	26.7367
2ABA_HUMAN	Serine/threonine-protein phosphatase 2A 55 kDa regulatory subunit B alpha isoform	30.0969	30.0814	30.0774	30.3587	30.0245	29.968	30.2668	30.0682	29.8854	29.9414	29.9489	30.1204	30.1327	30.2755	30.2649	30.1176	29.86	29.9902	30.1016	30.0487	30.1419	30.2702	30.3108	30.2742	30.3065	30.1926	30.2351	30.387	30.0363	30.0603	30.1892	30.2111	30.1844	30.2128	30.2276	30.2627	30.094	30.188	30.3825	30.2305	29.9407	30.1852	30.1012	29.9719	30.0074	30.2802	29.9751	30.1203
3BP1_HUMAN	SH3 domain-binding protein 1	29.8322	29.9624	30.2466	29.9502	30.0691	29.5356	29.9086	29.9736	29.8677	29.6661	30.0723	29.9584	29.5799	29.981	29.5668	29.5535	29.6985	29.6387	30.3613	29.8585	30.0194	29.9824	29.9757	30.0137	29.8753	29.8115	30.1693	30.0007	29.9177	29.7532	29.8302	29.75	29.9728	29.9771	30.0218	30.1558	29.8869	29.9187	30.1155	29.9037	30.0728	30.0018	29.919	29.7681	30.3881	29.9836	30.2993	29.9375
3HIDH_HUMAN	3-hydroxyisobutyrate dehydrogenase, mitochondrial	28.2419	27.6452	27.9081	27.8956	28.288	28.6743	28.1068	28.087	28.3598	28.4381	28.1986	28.3135	27.9264	27.6557	28.0274	27.8392	28.2736	28.3342	28.0051	28.0587	28.2245	28.1363	27.7946	28.3122	28.3871	28.15	28.0597	28.0719	28.258	28.2367	28.0217	28.3062	28.4179	27.9234	28.1896	28.192	28.2619	28.3316	28.1536	28.1058	28.1897	28.2385	27.5953	27.9371	28.2134	28.3226	28.4527	28.0604
3MG_HUMAN	DNA-3-methyladenine glycosylase	27.2904	27.3092	27.5769	27.3353	27.4452	26.9403	27.5549	NA	27.4693	27.0509	27.4034	27.0668	NA	27.3608	NA	NA	27.4016	27.5143	27.5072	27.3774	27.1874	27.0832	27.3402	27.2175	27.1714	26.8321	27.0813	27.3319	27.1755	26.9998	26.743	27.1248	27.0956	27.02	27.1681	27.2286	27.1034	27.0055	27.0781	27.051	27.1443	27.6575	27.0539	27.71	27.1577	27.5887	27.4143	NA
4F2_HUMAN	4F2 cell-surface antigen heavy chain	31.7623	31.9413	31.8636	31.837	32.0779	32.0766	31.9934	32.0325	32.2585	32.0971	32.4042	31.9584	32.1528	32.2297	31.846	32.1693	32.2153	32.1528	32.2794	32.1727	31.9494	31.8931	31.9008	32.0275	32.2809	32.2803	32.1513	32.2179	32.4532	32.3717	32.2605	32.4202	32.3144	32.1558	32.2032	32.1659	32.3207	32.1054	32.109	32.1643	32.2787	32.1182	32.0929	31.9641	32.6267	32.6973	32.5199	32.3308
5NTC_HUMAN	Cytosolic purine 5-nucleotidase	26.2576	26.2075	26.1226	26.5529	26.4549	NA	26.6494	26.4881	26.2014	26.6553	27.3137	26.3129	26.6312	26.7665	26.827	NA	NA	26.1979	26.4778	26.4476	26.5359	26.5583	26.3678	26.6903	26.2494	26.3241	26.9473	26.8949	26.3605	26.6235	26.79	26.6209	NA	26.2328	26.7966	26.4458	26.5908	26.3669	26.41	26.4994	26.7282	26.272	25.9744	26.0857	26.4872	26.8355	26.2467	26.2813
5NTD_HUMAN	5-nucleotidase	26.5178	NA	26.8947	NA	26.7757	NA	NA	NA	NA	NA	27.8691	NA	NA	26.6703	NA	27.0275	NA	NA	26.8061	NA	NA	26.6974	27.041	26.7694	27.1794	27.0002	26.5163	27.0196	27.0099	26.7898	26.8751	27.5087	27.0837	26.8217	27.0801	26.5582	26.9555	26.54	26.8388	26.8261	26.7238	26.9986	26.8421	26.5657	27.0711	27.6076	27.0554	NA
6PGD_HUMAN	6-phosphogluconate dehydrogenase, decarboxylating	32.6545	32.691	32.8127	32.8998	32.6297	32.3332	32.6048	32.776	32.3537	32.4656	32.6902	32.631	32.8232	32.6948	32.9167	32.6771	32.5109	32.5457	32.8299	32.7867	32.888	32.8952	32.6702	32.7555	32.6775	32.6858	32.9229	32.9889	32.6401	32.6516	32.8948	32.7761	32.7214	32.9003	32.9315	32.7874	32.4192	32.7404	32.8374	32.6755	32.8051	32.9334	32.8635	32.8115	32.8486	32.9389	33.0112	32.9192
6PGL_HUMAN	6-phosphogluconolactonase	31.0234	31.0571	31.0881	31.0923	30.9728	30.7519	31.2745	31.1877	30.9479	30.8868	31.2694	30.8435	30.9585	31.27	31.0417	30.7784	30.666	30.9891	30.997	31.0074	31.1121	31.2291	31.1453	31.2575	30.9161	30.9997	31.1532	31.3932	30.7437	30.9719	31.1483	31.1179	31.0057	31.2127	31.1484	31.3193	30.9098	30.9406	31.2015	31.0791	30.9626	31.1437	31.0335	30.8579	31.1472	31.0997	31.0948	31.1481
A16A1_HUMAN	Aldehyde dehydrogenase family 16 member A1	27.6367	27.2425	26.7356	27.4137	27.7658	27.4888	27.2358	27.8274	27.8542	27.3896	26.5769	27.26	27.6166	26.4943	28.0714	27.2411	26.9082	27.1886	27.2103	27.421	28.7345	28.0569	28.4625	27.4072	27.9923	27.7477	27.9408	27.4763	27.4527	27.9551	26.1515	27.6048	27.9304	27.531	27.1719	27.9254	27.5729	27.6996	27.6991	28.1534	27.7133	27.7765	27.6894	27.9455	25.9776	28.9677	26.6158	26.6676
A2MG_HUMAN	Alpha-2-macroglobulin	29.069	29.1211	29.2509	29.0245	29.1785	29.0862	29.2023	28.9999	29.0389	29.2521	29.2916	29.0437	29.0962	29.1589	29.1673	28.831	29.0969	29.3014	29.2882	28.7266	29.1017	28.6532	29.186	29.2837	29.3475	29.2071	29.0846	29.0256	29.1188	29.1766	29.2602	29.2882	29.1221	28.9606	29.0843	28.6166	29.1866	29.1035	28.9139	29.099	29.106	28.9537	28.9662	29.1999	29.1812	29.4765	28.931	28.9218
AAAS_HUMAN	Aladin	28.3212	28.1503	27.6371	28.1685	28.4624	28.2494	28.1579	28.7546	28.2704	28.2731	28.3266	28.4805	28.3644	27.8276	27.9763	28.1208	28.1684	28.2669	28.2498	27.889	28.3963	28.0073	27.8851	28.4802	27.7932	27.9103	28.3945	27.3694	28.1539	28.1097	27.4711	27.8511	28.0642	28.5124	28.3667	28.1382	28.2096	28.6321	28.153	28.856	27.9063	27.8249	28.5297	28.5538	27.9982	28.0916	28.0976	28.2332
AAAT_HUMAN	Neutral amino acid transporter B(0)	28.4538	28.8725	28.7869	28.9123	28.8013	28.8405	29.1985	28.9767	29.456	28.9969	29.4133	29.0232	29.2455	29.285	28.8716	29.0508	29.0018	28.9712	29.1744	29.1491	28.837	28.8539	28.7773	29.0486	29.1413	28.895	28.7103	28.9694	28.8961	28.8327	28.6797	29.136	29.3317	28.661	28.8119	28.7854	28.9975	28.8767	28.7871	28.7548	30.2203	28.9159	29.0094	29.028	29.2422	29.3707	29.3901	28.7083
AAK1_HUMAN	AP2-associated protein kinase 1	27.6818	28.264	NA	NA	28.0297	27.4589	28.0525	NA	27.5489	NA	28.0976	27.515	NA	27.8059	27.8598	27.5686	28.2264	NA	27.7642	28.0571	28.2105	27.9831	28.1865	28.1347	27.8913	27.3592	27.982	27.8128	27.8775	27.601	27.8477	27.8273	27.7866	27.979	27.9973	28.3123	27.6822	27.6969	28.0353	27.4673	28.1694	28.2083	28.1027	27.9989	28.1358	28.1593	28.1029	28.147
AAKG1_HUMAN	5-AMP-activated protein kinase subunit gamma-1	26.1795	25.7934	25.6245	26.3511	25.7215	25.603	25.0273	26.2901	25.2893	25.4761	25.1885	25.6512	NA	26.3069	25.8617	25.4935	25.5412	25.6399	25.725	25.6322	NA	26.7027	26.0827	26.4162	25.5117	26.9657	25.7064	25.8029	24.7169	NA	25.2617	25.8142	25.8538	25.8617	25.8864	26.1195	25.0786	25.8614	NA	25.124	NA	26.383	27.1812	25.7243	25.5012	25.9765	25.1287	26.3744
AATC_HUMAN	Aspartate aminotransferase, cytoplasmic	NA	26.8858	27.3873	27.6243	27.4002	NA	27.0431	27.2005	27.0828	26.8246	27.7094	27.0185	27.5254	27.0052	27.3138	NA	27.0008	27.464	27.2557	NA	26.9059	27.1029	27.3163	27.2187	26.8924	NA	NA	27.2218	27.2906	26.9946	27.4216	27.657	27.341	27.044	27.3975	27.1988	NA	NA	27.1286	27.2411	NA	27.0785	26.8276	26.9118	NA	NA	26.729	NA
AATF_HUMAN	Protein AATF	26.8182	27.0372	27.1563	26.9581	26.8162	27.5187	27.4961	NA	27.2125	27.3226	27.7196	26.8847	27.5774	27.07	26.989	NA	27.0578	27.4332	27.2233	27.3133	26.8641	26.8633	26.9979	27.6969	27.2291	26.7266	27.26	27.3118	26.8324	28.3237	27.5638	26.8012	27.7481	26.6415	26.7556	26.7852	27.0612	27.3916	26.5619	27.3845	26.6328	26.7078	27.4378	26.7632	27.1832	27.2635	26.7908	27.5546
AATM_HUMAN	Aspartate aminotransferase, mitochondrial	30.5613	30.6014	30.5728	30.4012	31.15	31.2057	30.7521	30.5752	30.5074	30.4237	30.5386	30.7481	30.8539	30.5857	30.2381	30.781	30.775	30.3935	30.8236	30.5454	30.7519	30.7574	30.3753	30.771	31.3074	30.9171	30.668	30.3686	30.7911	30.6856	30.477	30.7938	31.1317	30.6211	30.9793	30.3246	30.5318	30.6686	30.423	30.7618	30.9492	30.648	30.535	30.4994	30.8818	31.3125	30.8497	31.2293
AB1IP_HUMAN	Amyloid beta A4 precursor protein-binding family B member 1-interacting protein	29.3304	29.4828	29.5328	29.3472	29.222	29.2858	29.696	29.3375	28.875	29.4548	29.4133	29.4419	29.3446	29.2987	29.5259	29.6282	28.9167	29.3149	29.4448	29.3953	29.2704	29.557	29.3469	29.4917	29.2477	29.4683	29.476	29.2985	29.2436	29.3081	29.6278	29.3992	29.2389	29.3428	29.363	29.463	29.4033	29.4358	29.5069	29.2217	29.6235	29.7051	29.552	29.5639	29.736	29.373	29.4346	29.4763
ABC3C_HUMAN	DNA dC->dU-editing enzyme APOBEC-3C	26.4955	26.8494	26.7214	26.8708	27.0947	NA	27.1572	NA	NA	26.7222	27.0244	27.0013	26.7879	NA	27.2775	NA	NA	26.9017	26.5001	27.2719	26.1046	26.3027	25.4877	26.1636	25.9432	26.4959	26.3299	NA	25.4432	26.1903	NA	NA	26.1276	NA	NA	27.0311	26.4184	26.4605	26.0499	NA	26.0164	26.4963	26.3443	26.4468	25.4788	NA	26.3201	NA
ABCD1_HUMAN	ATP-binding cassette sub-family D member 1	29.1458	28.8167	28.8872	29.0628	29.304	29.0054	28.7239	28.9215	29.2253	28.9699	28.6134	29.0052	29.1028	28.8808	28.9205	28.6222	29.0613	29.0452	28.4828	28.8872	28.9335	28.7935	29.2348	28.5553	29.16	29.0164	29.2961	28.8488	29.3337	29.1228	29.3766	29.0524	29.1103	29.0964	28.8758	29.1705	28.9776	29.0507	28.9721	28.952	29.1396	28.7909	29.1278	29.0199	28.829	28.6661	29.2029	28.3963
ABCD3_HUMAN	ATP-binding cassette sub-family D member 3	29.7013	29.7797	30.016	29.9775	30.0785	29.8341	29.9649	30.0994	30.3207	29.8426	29.2251	29.9386	29.8999	29.5561	30.2933	29.8729	29.8558	29.8755	29.7371	29.951	30.2262	30.1982	30.334	30.1004	30.4017	30.2311	30.2598	29.9091	30.1844	30.335	29.5542	29.941	30.2132	30.0578	30.2736	30.0724	30.1136	30.0387	29.9584	30.2346	30.0557	30.216	29.9821	29.9093	30.2012	29.9704	30.0074	29.5221
ABCE1_HUMAN	ATP-binding cassette sub-family E member 1	30.508	30.5834	30.5733	30.4675	30.5653	30.3156	30.6879	30.548	30.1944	30.4201	30.5969	30.2948	30.4738	30.4759	30.5637	30.2381	30.3178	30.3998	30.7101	30.5052	30.5863	30.6168	30.6402	30.4764	30.5242	30.4108	30.674	30.6242	30.3959	30.3655	30.5889	30.3139	30.4298	30.6482	30.4842	30.4629	30.3916	30.5761	30.6796	30.3807	30.5593	30.6592	30.5995	30.5444	30.3421	30.602	30.4519	30.3231
ABCF1_HUMAN	ATP-binding cassette sub-family F member 1	26.1162	26.8113	26.6345	26.307	26.6005	NA	27.0865	NA	26.6103	26.6675	27.1663	26.5902	NA	26.9294	NA	NA	NA	26.4889	27.2176	NA	26.5999	NA	26.8902	26.8272	26.6402	26.615	26.5349	26.8838	26.5706	26.8029	26.6326	26.942	26.937	26.8663	26.8022	26.8248	26.009	26.5724	26.8151	26.6882	26.6473	26.4135	26.274	26.1332	26.3188	26.3817	26.4252	NA
ABCF2_HUMAN	ATP-binding cassette sub-family F member 2	28.3525	28.5603	28.6271	28.5577	28.4645	28.6008	28.2251	27.8565	28.2467	28.2876	28.2057	28.4468	27.4668	28.1039	27.9022	NA	27.9374	28.3078	28.5881	28.4062	28.5713	28.5868	28.6513	28.5795	28.157	28.2854	28.4328	28.5692	28.4614	28.2579	28.4093	28.2807	27.9771	28.3477	28.2038	28.4031	28.2428	28.1546	28.3424	28.2968	28.1045	28.4901	28.4267	28.2342	28.1202	28.0453	28.4245	28.079
ABCF3_HUMAN	ATP-binding cassette sub-family F member 3	26.5037	26.1781	25.4315	26.9015	26.4433	26.5489	25.6514	NA	26.2747	26.106	26.3142	26.4699	26.3882	25.5291	26.3748	NA	NA	26.2748	26.1791	25.977	26.9134	26.9394	26.9138	25.9115	26.6497	26.2656	26.4705	26.1675	26.2014	26.1334	NA	26.1867	26.8803	26.6058	26.5805	26.5979	26.7035	26.4772	27.0562	26.6235	25.7448	26.4468	26.2624	26.8028	26.0537	25.5407	26.1421	NA
ABD12_HUMAN	Monoacylglycerol lipase ABHD12	28.8889	29.0402	28.8825	28.9649	29.0348	29.1826	29.0757	29.2159	29.0488	29.0407	29.1073	29.1741	29.0938	29.1339	28.5891	28.5525	28.9637	28.9833	29.0129	29.1228	29.1579	28.9788	29.0234	29.1066	29.2797	29.1114	28.7148	28.9844	29.0671	29.0144	28.6102	29.1094	29.1866	28.8814	29.0871	28.9311	28.774	29.1345	28.9271	29.1041	28.696	28.7584	28.8752	28.7726	28.7931	29.0691	28.8387	28.7452
ABHDA_HUMAN	Mycophenolic acid acyl-glucuronide esterase, mitochondrial	28.7991	28.5978	29.0828	28.6628	28.7649	29.1104	28.9576	28.9583	29.3141	29.2285	29.2837	29.0292	29.0415	29.37	28.6596	29.1463	29.1908	28.8827	29.219	28.8792	28.9943	28.8593	28.791	29.2486	29.012	29.0699	28.7081	29.0233	29.0531	28.9924	29.1438	29.2775	29.1999	28.9978	28.9996	29.0771	29.2799	29.0656	28.9986	29.1938	29.0511	29.0127	28.9241	28.7641	29.4721	29.4899	29.2722	29.5415
ABHDB_HUMAN	Protein ABHD11	27.0072	26.2149	26.6036	26.7469	26.8148	NA	26.7314	27.1022	28.3743	27.1472	27.0259	26.7656	27.1627	26.5933	27.1089	NA	27.2806	26.9523	27.0981	27.3352	27.3342	27.0325	26.8131	27.3776	27.3763	28.0145	27.2932	27.3987	27.3388	27.5102	NA	27.5999	27.5319	27.3732	27.1046	28.1518	27.6747	27.5021	27.1347	27.1268	26.7552	27.2744	27.8925	NA	27.431	28.4786	26.9628	27.2511
ABHEB_HUMAN	Protein ABHD14B	NA	27.2262	27.391	27.4712	27.217	NA	27.3156	NA	NA	NA	27.3029	27.6785	NA	27.378	NA	NA	NA	NA	27.2662	27.3342	27.6722	27.727	NA	NA	NA	NA	27.5651	NA	NA	NA	NA	27.495	NA	NA	27.0247	NA	NA	NA	NA	NA	27.0313	26.8156	27.1606	26.8742	27.2778	NA	27.1079	NA
ABHGA_HUMAN	Protein ABHD16A	28.6109	28.5454	28.7653	28.2901	28.9488	29.2703	28.2272	28.0034	28.3854	28.1933	28.5122	28.803	28.6622	28.8604	27.5672	28.2383	28.3772	28.4999	28.5686	27.8036	28.5892	28.5354	28.7353	28.6529	28.7633	28.6131	28.4271	28.6238	28.3794	28.4822	28.3857	28.8032	28.8211	28.3238	28.5844	28.4202	28.1777	28.6549	28.313	28.6405	29.0359	28.451	28.6763	28.7024	28.791	28.5809	28.5521	28.505
ABI1_HUMAN	Abl interactor 1	28.3468	28.4145	28.5426	28.0971	28.3641	28.4132	28.4861	28.4829	28.4207	28.5105	27.7069	28.2217	28.3762	28.3577	NA	28.5241	28.4689	28.4494	28.3129	28.2499	28.516	27.9788	28.5368	28.2495	28.5855	28.3822	28.0161	28.5956	28.6687	28.468	28.6743	28.2219	28.524	28.4574	28.5553	28.5951	28.3918	28.3163	28.4943	28.3564	28.6626	28.4708	28.2093	28.3135	28.4025	28.6642	28.3566	28.7958
ABR_HUMAN	Active breakpoint cluster region-related protein	29.8079	30.1826	30.3099	30.1334	30.2371	30.1178	NA	30.0569	29.9971	30.0738	30.2123	30.4683	29.9642	30.3873	30.3871	NA	30.3714	30.4044	29.837	30.1414	30.6694	30.6445	30.6973	30.2517	30.4316	30.1096	30.3792	30.5121	30.3659	30.5521	30.4402	30.2137	30.9796	30.5158	30.4887	30.5754	30.1857	30.1349	30.6144	30.4248	30.6317	30.2762	30.0318	30.3232	30.8683	30.3129	30.0982	29.3302
ABRAL_HUMAN	Costars family protein ABRACL	31.5627	31.2932	31.6757	31.73	31.3282	31.527	31.8245	31.8988	31.8269	31.3831	31.4471	31.4655	31.7931	31.8095	32.105	31.507	31.2711	31.3741	31.4485	31.5062	31.6647	31.8994	31.6372	31.6566	31.555	31.8622	31.6859	31.7888	31.3447	31.5861	31.5225	31.3179	31.7063	31.7022	31.7523	31.8215	31.3736	31.342	31.6975	31.6358	31.2996	31.6084	31.3123	31.2206	31.7216	31.8304	31.0922	31.4529
ACAD9_HUMAN	Acyl-CoA dehydrogenase family member 9, mitochondrial	29.8746	29.6176	29.6533	29.7514	29.9935	30.1835	29.7219	29.9033	30.0647	29.9966	29.9761	29.9528	29.6842	29.8555	29.8004	29.8357	29.9063	29.893	29.8141	29.7424	30.0415	29.7503	29.4777	30.055	30.0115	30.0046	29.9355	29.9481	30.0519	30.1411	29.7775	30.1799	30.2302	30.0632	30.0639	29.8451	30.1763	29.8673	29.9252	29.9506	30.3434	29.7277	29.5567	29.7561	30.0603	30.1661	30.3984	29.9207
ACADM_HUMAN	Medium-chain specific acyl-CoA dehydrogenase, mitochondrial	31.9522	31.8212	31.9733	31.9349	32.2198	32.4673	32.0211	32.0143	32.1795	32.2082	32.181	32.1942	32.1153	32.3173	31.8827	32.2397	32.2497	32.328	32.1621	32.0568	32.202	32.0312	31.8199	32.273	32.206	32.2791	32.2471	32.3562	32.4402	32.1963	32.3278	32.5532	32.3595	32.1993	32.3931	32.2537	32.5538	32.2743	32.2176	32.3599	32.3562	32.1357	32.0592	31.9179	32.5652	32.5619	32.5868	32.2779
ACADS_HUMAN	Short-chain specific acyl-CoA dehydrogenase, mitochondrial	27.2789	27.2244	27.1744	27.0408	27.0116	27.7609	27.2375	27.6958	27.729	27.7285	27.3532	26.9895	27.6419	27.2904	27.3767	27.0703	27.5058	27.1006	27.3683	27.116	26.8276	27.2555	28.0415	27.1133	27.7064	27.6174	27.116	27.6089	27.7766	27.3472	27.7064	27.5402	27.6358	28.0716	27.3562	27.1211	27.3505	27.3582	26.9954	27.093	27.1782	27.3449	27.2848	27.1644	27.4391	28.1419	27.3268	27.7293
ACADV_HUMAN	Very long-chain specific acyl-CoA dehydrogenase, mitochondrial	31.3279	31.2269	31.7011	31.1855	31.4905	31.5897	31.3323	31.1579	31.409	31.3963	31.829	31.5834	31.181	31.4514	31.0581	31.2594	31.2808	31.338	31.5887	31.2087	31.3911	31.2256	31.1272	31.4554	31.4307	31.4604	31.275	31.3786	31.6047	31.3795	31.6044	31.4967	31.4688	31.2403	31.425	31.3221	31.5361	31.3045	31.3257	31.3432	31.4525	31.0984	30.953	31.1395	31.8059	31.6839	31.7422	31.488
ACAP2_HUMAN	Arf-GAP with coiled-coil, ANK repeat and PH domain-containing protein 2	26.1855	25.8614	25.7243	26.213	NA	25.7829	25.5807	26.6875	25.7679	25.3533	26.2025	25.4264	NA	NA	26.0334	NA	25.8372	25.9043	NA	25.7958	NA	26.1422	NA	26.1241	26.756	26.2901	25.9104	26.4071	26.1452	NA	26.1264	25.9569	26.0852	25.8908	26.2361	26.0989	25.072	25.8679	26.0561	26.773	26.0925	NA	25.3967	25.6421	26.6967	26.1478	NA	26.1032
ACBP_HUMAN	Acyl-CoA-binding protein	32.0665	31.922	31.8002	31.977	32.093	31.668	31.9086	31.8652	31.7151	31.7585	32.1111	31.6199	31.8802	31.9654	31.9821	31.916	31.7575	31.823	32.0836	31.9586	32.223	32.3903	32.2189	32.1001	32.1841	32.198	32.3514	32.4439	31.9399	32.1286	31.8438	32.0732	32.2257	32.4453	32.2741	32.3295	32.0934	32.1177	32.2633	32.1806	32.0156	32.4009	32.0263	32.1548	31.8781	32.0186	32.0215	31.9255
ACDSB_HUMAN	Short/branched chain specific acyl-CoA dehydrogenase, mitochondrial	27.333	26.7411	26.4909	26.6484	27.0504	27.1721	26.518	27.7309	27.0348	27.2487	26.448	26.9983	27.3342	26.818	26.6399	27.0011	27.0814	26.7773	27.3332	26.75	27.0637	26.6513	26.8905	27.243	26.966	27.1335	26.8395	26.4945	27.2974	27.4676	26.7972	26.9649	27.4111	27.0942	27.4795	27.4378	27.1952	27.05	27.039	27.531	26.486	26.6768	26.6223	26.5082	26.6457	27.1663	26.7119	26.7039
ACINU_HUMAN	Apoptotic chromatin condensation inducer in the nucleus	30.9833	31.1539	31.2548	30.8479	31.0992	31.1999	31.1155	31.0357	31.3193	31.0015	31.0959	30.8496	31.1293	31.1489	31.0999	31.1838	31.0089	31.1285	30.8883	30.9854	31.2068	30.9747	31.1859	31.1166	31.0589	31.2119	30.9981	31.0732	31.1641	31.2699	31.4782	31.1951	31.158	31.0571	30.9826	31.0495	31.4101	31.2149	30.9396	31.0542	31.1051	30.9178	31.174	31.0292	31.4269	31.1761	31.1348	31.1067
ACL6A_HUMAN	Actin-like protein 6A	30.0952	29.9268	30.2179	30.0091	30.2467	30.0393	30.2035	29.884	30.3142	29.9441	30.1847	30.231	29.9796	30.0308	29.9832	30.1784	30.1264	30.0858	30.255	30.126	30.0875	30.1654	30.242	30.271	30.2421	30.1615	30.2769	30.3261	30.3588	30.4193	30.3897	30.3674	30.24	30.1214	30.1418	30.2802	30.3606	30.3264	30.1163	30.3144	29.8453	30.0474	30.2346	30.4352	30.276	30.2714	30.3491	29.8797
ACLY_HUMAN	ATP-citrate synthase	32.6599	32.8116	32.6975	32.6422	32.5357	32.4915	32.5762	32.5293	32.4909	32.458	32.5939	32.4965	32.4776	32.6347	32.5564	32.4929	32.3443	32.5431	32.6261	32.5812	32.7067	32.7791	32.7875	32.8047	32.685	32.6864	32.735	32.6959	32.6175	32.5154	32.6172	32.5315	32.587	32.7268	32.5788	32.71	32.4107	32.5857	32.6766	32.6276	32.773	32.8699	32.7227	32.7339	32.6533	32.5098	32.5816	32.5145
ACOC_HUMAN	Cytoplasmic aconitate hydratase	28.7664	28.5785	28.6558	28.6066	28.4746	28.4426	28.7565	28.342	28.4775	28.3415	28.5623	28.4245	28.6429	28.5655	28.6741	NA	28.3587	28.4396	28.5469	28.7453	28.7755	28.7242	28.6986	28.6166	28.4663	28.5217	28.7514	28.7315	28.4731	28.3721	28.7476	28.551	28.7682	28.7856	28.7745	28.8508	28.5472	28.5883	28.8244	28.4059	28.4689	28.6422	28.8005	28.7275	28.5982	28.7895	28.9322	28.1552
ACON_HUMAN	Aconitate hydratase, mitochondrial	31.605	31.5234	31.7488	31.497	31.7515	32.0817	31.6774	31.766	31.8575	31.9814	31.9533	31.7406	31.7143	31.8943	31.6988	31.8512	31.8864	31.8755	31.7347	31.7697	31.8356	31.6889	31.5589	31.8685	31.9328	31.9162	31.7746	32.0009	31.8847	31.7602	32.1254	32.1234	31.9515	31.8065	32.0062	31.875	32.0888	31.9569	31.8734	31.9287	31.8529	31.6896	31.6824	31.5397	32.1917	32.1041	32.1951	31.8416
ACOT1_HUMAN	Acyl-coenzyme A thioesterase 1	29.027	28.9902	29.2779	28.98	28.8806	29.4771	28.9743	28.7006	29.2381	29.3447	29.4591	29.1616	29.0437	29.1569	28.5771	28.6954	29.1682	29.0823	28.9755	28.4122	29.0588	28.2921	29.1362	28.9997	29.1782	29.1683	29.2525	29.2282	28.9001	29.2245	29.2957	29.3041	29.1162	29.1279	29.1551	29.0469	29.4191	29.1521	29.1294	29.2407	29.4718	28.9127	28.8117	28.4962	29.4677	29.402	29.7781	29.5406
ACOT8_HUMAN	Acyl-coenzyme A thioesterase 8	27.1213	27.5757	27.3977	26.9544	27.301	27.2918	27.606	26.6648	27.7848	27.2729	27.4672	26.7357	27.187	27.2085	27.3542	NA	NA	27.3009	27.1885	27.0285	27.3069	27.0548	27.0766	26.7349	27.7924	27.1272	NA	27.0576	27.5715	26.9421	27.5669	26.9937	NA	27.2199	27.315	27.5336	27.3735	27.2877	NA	27.6693	27.2208	27.3101	27.5969	27.3019	27.4054	27.3547	27.6806	27.2474
ACOT9_HUMAN	Acyl-coenzyme A thioesterase 9, mitochondrial	28.9545	28.779	28.5427	28.6814	29.1236	29.0456	28.6299	29.3308	29.2317	29.1736	29.0917	28.5857	29.0691	28.7424	28.5904	29.0734	29.0583	28.8978	29.0631	28.8577	29.0174	29.1544	28.9517	28.9828	29.2172	29.2752	29.2282	29.0589	29.3605	29.3136	29.206	29.0845	29.436	29.3735	29.4407	29.2064	29.3235	29.1861	29.0116	29.1543	29.0718	28.8555	28.3753	28.9586	28.8831	29.3708	28.9578	28.9977
ACOX1_HUMAN	Peroxisomal acyl-coenzyme A oxidase 1	31.0741	31.2273	31.3247	31.0019	31.1375	31.2983	31.2714	30.8842	31.2972	31.2582	31.0948	31.0757	31.0174	31.0849	31.0113	31.006	30.9911	31.1439	31.1862	31.0142	31.0495	31.0288	31.3102	31.2765	31.2492	31.283	31.1071	31.2508	31.2462	31.1483	31.4245	31.2528	30.9425	31.1255	30.9111	30.8716	31.2052	31.0212	30.9368	31.0863	30.9708	30.9944	31.0985	31.1673	31.3073	31.3387	31.143	30.9976
ACOX3_HUMAN	Peroxisomal acyl-coenzyme A oxidase 3	27.9251	28.0824	27.8013	27.6572	28.0305	28.3178	28.1056	28.1599	28.366	28.4088	28.2416	28.3768	27.9891	28.3122	28.1454	28.1239	28.014	28.5426	28.3288	28.2497	28.559	28.1851	28.288	28.5775	27.0065	28.2299	28.2423	28.0441	28.4047	28.183	28.3021	28.2028	28.0423	28.2729	28.4739	28.3484	28.3874	28.3795	28.1718	28.4344	27.3932	27.6896	27.6611	27.8597	27.7689	27.8402	27.2467	27.9291
ACPH_HUMAN	Acylamino-acid-releasing enzyme	28.9847	28.5959	28.822	28.8942	28.5205	28.1896	28.1826	27.8132	27.9291	28.0401	28.9092	28.8171	28.2202	29.0024	28.4334	NA	28.3104	28.1154	28.6401	28.1686	28.625	28.5872	28.5907	28.3171	28.4251	28.3022	28.4673	28.4914	28.1687	28.1217	28.7093	28.3356	28.3929	28.5256	28.2387	28.4579	28.3584	28.1874	28.4594	28.3895	28.3504	28.6144	28.5653	28.6556	28.3303	28.6508	28.5567	28.5516
ACPM_HUMAN	Acyl carrier protein, mitochondrial	28.7974	27.8751	28.9345	28.4751	28.6762	29.1173	29.1297	28.7916	29.0002	28.8433	29.0058	29.0986	29.1481	29.0691	28.6082	28.6554	29.133	29.1218	29.0684	28.9404	29.0135	28.933	28.9366	29.2194	29.1259	29.1188	29.195	29.1907	29.2559	29.389	29.4129	29.5122	29.3119	29.1424	29.3046	29.2577	29.4627	29.3963	29.1043	29.3997	29.0747	28.3794	28.4021	28.8488	29.2636	28.9682	29.0161	28.9148
ACSL1_HUMAN	Long-chain-fatty-acid--CoA ligase 1	29.8847	30.12	30.0614	29.7524	30.0566	29.8811	29.8917	29.6931	29.9979	29.6146	29.7216	29.8142	29.681	29.8073	29.7901	29.7804	29.6924	29.5342	29.9314	29.4907	30.0578	29.8928	30.2374	30.0356	29.9212	29.8453	29.9076	29.6945	29.8517	29.7663	30.1338	29.7967	30.0354	29.8713	29.8238	29.9555	29.82	29.9222	29.7516	29.9917	30.0341	29.9653	30.1409	30.0253	29.7985	29.9151	29.6839	29.9875
ACSL3_HUMAN	Long-chain-fatty-acid--CoA ligase 3	29.5364	29.456	29.5029	29.301	29.5573	29.8448	29.6672	29.7207	29.4866	29.6291	29.7353	29.5929	29.8324	29.4695	29.3892	29.0464	29.4434	29.4136	29.3916	29.1909	29.5441	29.3523	29.5946	29.6577	29.411	29.4823	29.2192	29.6775	29.6008	29.2516	29.7973	29.7469	29.5741	29.2697	29.3771	29.4656	29.4546	29.5305	29.5367	29.521	29.834	29.3851	29.3537	29.4075	29.8396	29.6722	29.6845	29.5486
ACSL4_HUMAN	Long-chain-fatty-acid--CoA ligase 4	30.4109	30.4479	30.623	30.4015	30.5396	30.4061	30.7712	30.5594	30.5101	30.4329	30.1616	30.4233	30.4326	30.3182	30.547	30.2245	30.3991	30.4453	30.2908	30.4732	30.5192	30.4106	30.5527	30.5055	30.3074	30.2749	30.3491	30.14	30.3509	30.1651	30.3092	30.1472	30.4319	30.4037	30.1355	30.2693	30.3013	30.3796	30.2886	30.1787	30.548	30.3354	30.4278	30.2331	30.3244	30.2451	30.1348	30.1762
ACSL5_HUMAN	Long-chain-fatty-acid--CoA ligase 5	27.7595	27.82	27.5179	27.5292	27.673	28.0447	28.0812	27.8072	27.9105	27.6267	28.1026	27.7808	28.0489	27.8932	27.3568	NA	27.6958	27.8206	27.9789	27.8898	28.1023	27.7211	27.6013	27.9294	27.7057	27.6451	27.5101	27.9901	27.4485	27.5869	27.9451	27.6241	28.0397	27.4558	27.7814	27.9297	27.5214	28.1659	27.3669	27.8022	27.9325	27.4425	27.6274	27.6726	27.9401	27.9353	27.5132	27.7352
ACTB_HUMAN	Actin, cytoplasmic 1	38.0794	38.1636	38.1502	38.0735	37.9709	38.0371	38.1867	38.0493	38.0052	38.0123	38.0841	38.0163	37.9036	38.0765	37.9996	38.0912	37.9672	37.9593	37.9918	37.9884	38.1532	38.2594	38.1454	38.0983	38.1376	38.1832	38.1843	38.1228	37.9849	38.0036	38.1766	38.0804	37.9733	38.0979	38.1201	38.2919	38.1002	38.0626	38.1119	38.1311	38.1498	38.1635	38.103	38.1635	38.0426	37.8632	38.0342	37.9851
ACTC_HUMAN	Actin, alpha cardiac muscle 1;Actin, aortic smooth muscle;Actin, gamma-enteric smooth muscle	33.161	33.7203	34.2952	33.6461	33.9569	33.7188	33.5985	33.771	33.6096	33.2446	34.2651	33.9586	33.5302	33.4606	33.652	33.7124	32.907	33.1315	34.283	32.8508	34.3006	33.9503	33.9192	34.1017	34.211	33.837	34.1387	34.2351	33.7593	33.875	34.3526	33.7155	33.6472	34.0527	34.0921	34.1206	34.1249	33.9393	34.0503	33.7979	34.334	33.4939	34.1928	34.142	34.4234	33.9723	34.0703	34.4626
ACTN1_HUMAN	Alpha-actinin-1	35.606	35.5949	35.5567	35.5744	35.5302	35.4105	35.5111	35.4227	35.5588	35.4669	35.5945	35.5014	35.4042	35.5166	35.4287	35.551	35.4882	35.5741	35.6629	35.4848	35.5839	35.5761	35.769	35.7139	35.7966	35.7513	35.6462	35.6858	35.6946	35.6267	35.6805	35.6177	35.751	35.7858	35.6645	35.7616	35.7506	35.668	35.6609	35.6378	35.6677	35.5658	35.6797	35.7277	35.5824	35.5707	35.5884	35.5223
ACTN4_HUMAN	Alpha-actinin-4	34.4083	34.455	34.5494	34.4132	34.4315	34.3572	34.3399	34.2099	34.3579	34.3619	34.5579	34.4906	34.3086	34.4823	34.3818	34.5591	34.4379	34.4198	34.6496	34.4199	34.4764	34.5102	34.6398	34.6616	34.7596	34.6359	34.5925	34.5972	34.6269	34.6114	34.641	34.5099	34.6355	34.6748	34.5608	34.6177	34.7073	34.5889	34.5835	34.5207	34.6333	34.5851	34.7019	34.7058	34.7396	34.5945	34.562	34.4237
ACTY_HUMAN	Beta-centractin	27.2058	26.4513	27.7685	27.9131	26.4558	26.7763	27.2171	27.1755	27.1422	27.3623	27.287	27.1787	27.5383	25.9368	27.023	NA	26.5829	27.1127	26.6036	26.8289	27.5722	27.5269	27.4147	26.7548	NA	NA	27.5588	26.5142	27.4521	27.8439	NA	27.5225	27.649	27.7849	27.7113	NA	27.5327	27.3437	26.8435	27.4806	26.7356	27.9638	26.8423	27.8159	27.2148	27.4225	26.4019	NA
ACTZ_HUMAN	Alpha-centractin	29.9349	30.0783	29.9684	30.0709	30.0488	29.8965	29.9811	30.1966	30.128	30.0014	30.0177	29.8578	29.8043	29.8631	30.0874	29.5419	29.6795	29.5224	30.1986	30.0073	30.0419	30.1763	30.1995	30.2498	30.1102	30.1739	30.302	30.2185	29.8489	29.9909	29.7157	29.9431	30.0108	30.2977	30.0088	30.0301	29.8048	29.8533	30.1948	29.9709	29.5677	30.0479	29.8833	29.9101	29.5889	29.7035	29.6491	29.9439
ACY1_HUMAN	Aminoacylase-1	27.3194	27.615	27.1819	27.1836	27.6332	NA	27.2276	NA	NA	27.3804	27.5	27.5257	NA	27.2667	NA	NA	NA	27.5251	27.4304	26.9361	27.3721	27.161	27.7421	27.4578	27.2145	NA	27.6171	27.711	27.3104	27.4265	27.1039	27.4393	27.6327	27.45	26.9505	27.0811	27.2666	27.3141	27.5098	27.3514	27.2159	27.4895	27.035	26.8695	27.4075	27.3605	NA	NA
ADA10_HUMAN	Disintegrin and metalloproteinase domain-containing protein 10	27.8826	28.4587	28.703	28.3067	28.2914	28.23	NA	NA	28.346	28.2465	28.4532	28.4152	28.4654	28.1196	NA	NA	28.5655	28.2824	28.5349	28.0674	28.0364	28.0488	27.4066	28.3436	28.2716	27.9432	28.1307	28.1134	28.2371	27.8274	28.311	28.1828	28.3925	28.0831	28.3456	28.0507	28.1051	27.7617	27.3753	27.8706	28.5759	28.0157	28.1143	28.2492	28.3583	28.4501	28.4555	28.1454
ADAM9_HUMAN	Disintegrin and metalloproteinase domain-containing protein 9	NA	26.9781	26.745	NA	27.3371	NA	NA	NA	27.5834	NA	NA	NA	27.7945	28.0876	NA	NA	NA	NA	27.565	NA	27.3045	26.8769	26.6072	27.4053	27.2612	27.1654	27.0383	27.319	27.6057	27.1373	27.5688	27.1145	26.7933	27.1337	27.1968	27.1258	27.3062	27.1326	27.1135	27.3164	27.9038	27.493	27.3163	26.9772	27.9311	27.276	27.4458	27.7356
ADAS_HUMAN	Alkyldihydroxyacetonephosphate synthase, peroxisomal	30.8412	30.9908	31.1135	30.9697	31.0022	31.1258	31.1345	30.907	31.2558	31.201	31.0709	31.1165	30.9929	31.0298	31.0718	30.9595	31.0852	31.1962	30.9972	30.9576	30.9343	30.98	31.1832	31.036	31.1263	31.1649	31.0692	30.9767	31.0779	31.1575	31.1473	30.9342	30.9568	31.0635	30.969	30.9521	31.1322	31.1655	30.9803	31.0215	31.2786	31.0816	31.0176	31.2356	31.1903	31.3898	31.2106	31.0363
ADHX_HUMAN	Alcohol dehydrogenase class-3	30.3602	30.2132	30.3623	30.5485	30.3211	30.1593	30.5356	30.1802	30.2464	30.2092	30.402	30.2976	30.2152	30.4165	30.3879	30.3126	30.0439	30.3775	30.4045	30.1477	30.344	30.5007	30.4672	30.5364	30.4336	30.3856	30.5375	30.5637	30.2796	30.3992	30.3628	30.3707	30.3216	30.6317	30.7287	30.4714	30.1391	30.2977	30.5964	30.3045	30.2132	30.5369	30.2934	30.0457	30.0657	30.1482	30.4715	30.6232
ADK_HUMAN	Adenosine kinase	28.9379	28.5631	28.5848	28.7921	28.7093	28.602	28.6077	29.0534	28.4535	28.6277	28.6449	28.7882	29.0047	28.5336	28.9383	28.0421	28.7196	28.8553	28.8046	28.8337	28.7268	28.9612	28.9649	28.7256	28.7081	29.0203	28.646	28.9016	28.7526	28.5841	28.68	28.8073	28.6598	28.9035	28.8199	28.7816	28.581	28.6714	28.9511	28.6585	28.0772	28.6768	28.3244	28.6391	27.9781	28.6489	28.3486	28.7884
ADNP_HUMAN	Activity-dependent neuroprotector homeobox protein	26.9953	27.6908	27.1708	27.3748	27.7195	NA	27.0795	27.1539	27.4477	27.0602	27.3517	27.0005	26.9516	27.61	NA	NA	27.297	27.3387	27.3517	27.2438	27.3471	27.3651	27.634	27.6635	27.6278	27.6196	27.3626	27.8351	27.7502	27.8747	27.9019	27.6743	27.3999	27.4147	27.5103	27.2623	27.6127	27.7491	27.3819	27.3714	27.598	27.459	28.1138	27.3844	27.9779	28.0135	27.8085	27.3821
ADPGK_HUMAN	ADP-dependent glucokinase	30.7334	30.5499	30.5208	30.5874	30.7157	30.7943	30.6073	30.6254	30.9125	30.6613	30.4951	30.6735	30.4597	30.2793	30.4374	30.5278	30.5945	30.5701	30.3721	30.5563	30.6319	30.6534	30.8537	30.7872	30.9345	30.7608	30.7074	30.6169	30.6389	30.6236	30.3792	30.574	30.7885	30.4724	30.685	30.5019	30.6225	30.601	30.5162	30.518	30.1762	30.2893	30.3432	30.6643	30.5075	30.6253	30.2794	30.1829
ADPPT_HUMAN	L-aminoadipate-semialdehyde dehydrogenase-phosphopantetheinyl transferase	27.5122	26.9334	26.709	27.0794	26.9086	27.2961	27.2973	27.0992	26.8189	26.9589	26.8225	27.204	27.0582	27.0691	NA	NA	27.1164	27.0838	27.0234	27.4039	26.9344	26.9103	26.7529	26.9363	26.7828	27.015	26.8175	26.9523	26.8536	26.932	26.6818	27.0097	26.5733	26.8854	27.0579	26.8783	26.5176	26.7266	27.2845	27.1407	27.3245	27.2584	26.7167	26.7904	27.2025	26.7577	27.034	27.5603
ADRM1_HUMAN	Proteasomal ubiquitin receptor ADRM1	28.8656	29.0159	28.9308	28.697	28.7216	28.9148	29.031	28.9137	28.6919	28.8612	28.779	28.8483	28.9183	28.9495	28.6119	28.6925	29.0364	28.8919	28.8848	28.8049	28.8533	28.7954	28.6959	29.2625	28.7666	28.9568	28.7546	29.0378	28.8902	28.8414	28.9557	28.9862	28.677	28.852	28.8069	28.9292	28.8076	28.8079	28.8025	28.6772	28.858	28.7436	28.7722	28.7407	29.0752	29.0918	28.9655	28.8744
ADSV_HUMAN	Adseverin	27.3571	27.4536	27.4514	27.5295	27.4684	26.7836	27.1519	27.8413	27.3555	27.4083	27.4571	27.2867	27.6551	27.2306	NA	NA	NA	27.5263	NA	27.4076	27.4421	27.7503	27.6895	27.162	27.2192	27.7605	27.4536	27.4025	27.4994	27.2591	27.3399	27.1454	27.5399	27.9111	27.2767	27.6553	27.5295	27.4925	27.6005	28.1019	27.0312	27.4871	27.3892	27.1741	26.9494	27.3054	27.0578	NA
ADT2_HUMAN	ADP/ATP translocase 2	32.0298	31.139	32.0108	31.7996	32.0496	32.1541	31.7277	31.9308	31.834	32.0339	31.9777	32.0221	31.6417	32.1211	31.5396	31.7175	31.9009	31.8746	31.8912	31.8488	32.298	31.8489	31.5243	31.7413	31.8244	32.0151	32.0344	32.0192	31.9744	32.0493	32.0999	32.2381	32.2933	31.8611	32.2276	32.2456	31.8958	31.896	31.9909	32.0609	32.2861	31.8948	31.6766	31.5472	32.3564	32.2881	32.5052	32.1014
ADT3_HUMAN	ADP/ATP translocase 3	33.7316	33.3788	33.6996	33.5946	33.7692	34.2872	33.735	33.9111	33.9072	34.0508	33.8488	33.8784	33.8764	33.9424	33.6822	33.8348	33.9325	33.9341	33.7295	33.805	34.0305	33.8196	33.6087	33.8292	34.0812	34.0909	33.9893	33.8672	34.0608	34.0292	33.8885	34.2766	34.3593	33.9075	34.2162	34.0001	34.0737	33.9492	33.9859	34.0666	34.1259	33.815	33.6349	33.5601	34.067	34.2649	34.2463	33.9998
AFG32_HUMAN	AFG3-like protein 2	29.3482	28.7145	29.4964	29.0654	29.3047	29.6874	29.4092	29.5355	29.6362	29.5005	29.6263	29.3448	29.2022	29.7113	29.3373	29.8463	29.4145	29.4064	29.3196	29.4185	29.3644	29.23	28.9508	29.3682	29.3112	29.3466	29.2498	29.4579	29.4574	29.4943	29.4656	29.6413	29.7269	29.2159	29.7577	29.6049	29.5831	29.4021	29.3592	29.3852	29.287	29.0982	29.1263	28.7539	29.7178	29.5296	29.7099	29.3998
AGAL_HUMAN	Alpha-galactosidase A	28.556	28.6514	28.6275	28.6264	28.7597	28.182	28.9387	28.2907	28.6377	27.7174	28.8241	28.8087	28.4765	28.8753	28.2526	28.0183	28.4224	28.391	28.9186	28.4617	28.3975	28.3047	28.6429	28.6409	28.6896	28.5388	28.4228	28.4428	28.3683	28.5702	28.5393	28.353	28.4745	28.3381	28.2935	28.48	28.2864	28.3238	28.3365	28.4075	28.3141	28.4824	28.5015	28.4849	28.5051	28.7958	28.7803	28.5183
AGAP3_HUMAN	Arf-GAP with GTPase, ANK repeat and PH domain-containing protein 3	27.3116	27.3971	27.2172	26.9346	27.3792	27.4923	27.7124	27.9395	27.4428	27.5455	27.316	27.0303	NA	27.6703	27.7694	NA	27.5634	27.1986	27.1361	26.9896	27.3208	26.9733	27.4064	27.1564	27.7268	27.6441	27.5975	27.355	27.3145	27.3466	27.5685	27.2321	27.6745	27.4393	27.7331	27.398	27.2018	27.3083	27.3799	27.0969	27.6014	27.2218	27.3157	27.1935	27.5283	27.6443	27.295	27.3364
AGK_HUMAN	Acylglycerol kinase, mitochondrial	27.6673	27.601	27.1454	27.7867	27.9886	27.5824	28.2765	NA	NA	27.8156	28.1038	27.787	27.3812	27.276	NA	NA	27.9507	27.3281	27.7085	28.3223	28.0101	27.7467	27.6132	27.9858	28.0855	27.9217	27.9583	27.8916	27.884	28.3329	27.0256	28.1798	28.4101	28.0036	28.0022	28.0553	28.1019	27.9217	27.8899	28.128	27.4879	27.4652	27.1632	26.9707	27.7028	28.119	28.6584	NA
AGM1_HUMAN	Phosphoacetylglucosamine mutase	26.2432	26.8436	26.6235	26.7779	26.4493	26.5365	26.4586	26.548	NA	NA	26.4809	26.7285	26.1966	26.4041	NA	NA	NA	25.9521	26.3026	26.5545	26.5412	26.3766	26.4174	26.6171	26.378	26.611	26.6871	26.5681	25.0145	26.4808	26.0665	26.3976	26.4829	26.7376	26.0958	26.6082	26.2144	26.1627	26.7367	26.49	26.3345	26.5936	26.31	26.2929	26.2269	26.5136	26.3211	26.4428
AGO2_HUMAN	Protein argonaute-2	28.3122	28.345	28.133	28.19	27.977	28.2589	28.3694	28.3536	27.9494	28.0467	28.2108	28.3006	28.287	28.2967	28.2562	27.4805	27.6111	27.9715	28.1649	27.9853	28.2179	28.062	27.8168	28.5453	28.2314	28.1164	28.02	28.0986	28.009	28.1046	28.3018	28.1245	28.3562	28.3807	28.3716	28.0806	27.9251	27.8688	28.3286	27.8305	27.8968	28.0199	28.0029	28.239	28.4839	28.3497	28.2339	27.9847
AGRIN_HUMAN	Agrin	25.2285	NA	25.3646	NA	NA	NA	24.9734	25.6054	24.9809	NA	25.3147	24.7988	NA	25.3605	25.8625	NA	25.3013	25.1009	NA	25.0612	24.9073	NA	25.2066	25.6802	NA	25.3588	24.5905	25.3723	25.4578	25.3696	25.1585	24.8876	25.1382	24.5753	24.9409	25.2383	25.5147	24.9023	25.4927	24.6046	24.7283	24.8509	25.3872	24.9656	25.3725	25.7674	25.3226	25.3181
AHNK_HUMAN	Neuroblast differentiation-associated protein AHNAK	34.5955	34.6591	34.8038	34.5517	34.4504	34.3631	34.417	34.2559	34.5963	34.5778	34.7413	34.5734	34.3336	34.6559	34.4476	34.5248	34.5586	34.6185	34.7642	34.5078	34.4997	34.6035	34.7054	34.7699	34.8151	34.7291	34.6959	34.8768	34.7906	34.7725	35.0399	34.7564	34.7219	34.8025	34.7252	34.6895	34.8535	34.6445	34.6251	34.6446	34.7335	34.5612	34.7292	34.5998	34.8809	34.857	34.7603	34.6337
AHSA1_HUMAN	Activator of 90 kDa heat shock protein ATPase homolog 1	30.527	30.3881	30.6154	30.5156	30.406	30.3617	31.1047	30.4026	30.23	30.314	30.6944	30.5868	30.4684	30.6576	30.3664	30.3919	30.4525	30.256	30.7213	30.2315	30.6099	30.7261	30.7365	30.7316	30.457	30.6315	30.6185	30.5993	30.5467	30.656	30.809	30.5842	30.3704	30.8953	30.7179	30.8324	30.3477	30.4143	30.6403	30.6488	30.5023	30.8724	30.4878	30.4425	30.7448	30.7561	30.5799	30.671
AIFM1_HUMAN	Apoptosis-inducing factor 1, mitochondrial	30.7357	30.6566	30.9855	30.7455	30.7665	31.0999	30.7454	30.7593	30.8399	30.8928	30.8361	30.8399	30.812	30.8604	30.6578	30.7591	30.658	30.724	30.7532	30.6725	30.8423	30.7992	30.8848	31.0067	30.9167	30.9358	30.7807	30.728	30.9958	30.9552	31.0289	30.8938	30.9394	30.7469	30.8358	30.6828	31.1145	30.8651	30.7434	30.9188	30.9871	30.8131	30.8642	30.6828	30.9645	31.1268	30.921	30.6898
AIMP1_HUMAN	Aminoacyl tRNA synthase complex-interacting multifunctional protein 1	29.9904	30.1687	29.9261	29.8541	29.7816	29.7277	29.8276	29.7782	29.8138	29.8843	29.9905	29.8508	29.7664	29.9747	29.6609	29.8787	29.54	30.174	30.0938	29.8211	29.8685	30.0074	30.0858	29.8932	29.7967	29.8666	29.9832	29.8418	29.9468	29.7256	29.9847	29.8618	29.9974	30.216	30.0392	29.7757	29.9698	29.8462	30.0884	29.8964	30.1472	30.2368	30.2422	30.2197	30.1621	30.0547	30.1752	30.0384
AIMP2_HUMAN	Aminoacyl tRNA synthase complex-interacting multifunctional protein 2	29.4906	29.485	29.6719	29.5147	29.5773	29.0692	29.3922	29.0348	29.2135	29.2249	29.6038	29.3652	29.1388	29.2762	29.4376	29.5018	29.0244	29.2098	29.5566	29.4526	29.0973	29.2653	29.0564	29.2968	29.153	29.1546	29.3345	29.3919	29.0213	29.0769	29.2654	29.0458	28.9869	29.358	29.1982	29.1066	28.9604	29.1545	29.3082	29.1849	29.3824	29.2705	29.4204	29.4085	29.2873	29.3902	29.2269	29.2001
AINX_HUMAN	Alpha-internexin	28.1806	28.4259	28.4905	27.6686	28.5454	27.9139	28.5866	27.77	28.5186	28.5205	27.6399	27.7768	NA	28.0302	NA	NA	27.9115	28.2805	28.1846	NA	28.1156	28.1525	28.4467	28.6094	27.5904	28.2138	28.0135	28.0927	28.1879	28.2979	28.5051	28.0175	27.9029	27.995	28.02	28.3717	28.4634	28.0911	28.0627	27.8749	28.1193	28.1455	28.2057	28.1477	28.242	28.0219	28.0653	27.9754
AIP_HUMAN	AH receptor-interacting protein	29.4772	29.2898	29.1635	29.2227	29.3584	28.9962	29.1882	29.4295	29.1314	29.3023	29.581	29.3021	28.9792	29.1574	29.1165	28.7239	29.0878	29.2323	29.3847	29.3572	29.7634	29.5091	29.5142	29.6524	29.6226	29.5592	29.726	29.6073	29.2917	29.4661	29.417	29.5745	29.5559	29.7515	29.5954	29.6422	29.3482	29.5911	29.6514	29.6191	29.1653	29.578	29.0511	29.5285	29.1915	29.0508	29.7203	29.0408
AK17A_HUMAN	A-kinase anchor protein 17A	26.2068	26.5194	26.3369	26.0594	26.5251	NA	26.4155	NA	26.8298	NA	26.52	26.571	NA	26.163	NA	NA	26.6382	NA	26.3626	NA	26.5938	26.0851	26.2382	26.3489	26.4801	26.6353	26.4713	NA	26.3204	26.3233	26.7567	26.3038	26.1032	26.5092	26.2621	26.273	26.5372	NA	26.2371	26.1659	26.9539	26.2934	26.5439	26.1638	26.3507	26.2848	26.6118	NA
AK1A1_HUMAN	Alcohol dehydrogenase [NADP(+)]	30.3192	30.3171	30.3661	30.4904	30.2621	30.2422	30.5801	30.5664	30.1551	30.3494	30.6565	30.3159	30.4956	30.4978	30.4655	30.2538	30.2621	30.4339	30.6141	30.5166	30.4559	30.5625	30.518	30.5874	30.5365	30.5138	30.6088	30.7977	30.3063	30.2734	30.5268	30.3954	30.371	30.693	30.4366	30.5885	30.3275	30.3606	30.5517	30.488	30.5056	30.7079	30.6226	30.5209	30.5655	30.4476	30.5064	30.6314
AKAP1_HUMAN	A-kinase anchor protein 1, mitochondrial	27.7666	27.2437	26.9179	26.8948	27.4761	28.0856	26.4815	26.6966	26.7533	27.5774	26.4828	27.1788	26.6983	26.6747	26.5849	28.3597	27.861	27.2703	26.7971	26.6271	26.6256	26.5911	26.8532	26.023	26.337	26.7585	26.8928	26.7042	27.1401	26.3389	26.5904	26.6668	26.3931	27.2055	26.4234	26.2515	26.979	26.9461	25.9926	26.9309	26.1774	26.2394	26.2545	26.475	26.1999	26.8731	25.8804	26.6136
AKAP8_HUMAN	A-kinase anchor protein 8	28.0588	27.7553	28.1157	27.6035	27.9145	28.4274	27.8485	27.8218	28.1105	27.5392	NA	27.4581	25.5531	27.7407	27.7925	27.9748	27.9784	27.7994	27.358	27.6039	26.8555	27.111	27.0747	27.2611	27.4351	27.2277	27.0427	27.4345	27.8281	27.6338	28.1754	27.7651	27.2889	27.6756	27.2386	27.2565	27.8375	27.7829	27.6852	27.2899	27.4126	27.3548	27.6512	27.0668	27.7296	27.9507	27.5943	27.5682
AKT1_HUMAN	RAC-alpha serine/threonine-protein kinase	26.2137	NA	26.2077	26.8666	26.0627	NA	26.8648	NA	NA	NA	NA	NA	26.5598	NA	NA	NA	NA	NA	NA	NA	26.2104	26.563	26.5744	26.1759	26.0179	NA	26.1126	26.5632	NA	NA	26.098	NA	NA	NA	26.6096	26.4201	NA	NA	26.1567	NA	25.8674	25.8905	26.0468	NA	25.762	25.702	25.6122	NA
AL1B1_HUMAN	Aldehyde dehydrogenase X, mitochondrial	29.4866	29.3206	29.8152	29.3704	29.7671	30.0372	29.7612	30.0545	30.0165	29.7494	29.9757	29.503	29.6387	29.8079	29.7429	29.3562	29.6088	29.6831	29.798	29.5153	29.3974	29.2946	29.3591	29.5789	29.8571	29.9106	29.5558	29.5441	29.761	29.4883	30.1456	29.9379	29.8277	29.6163	29.648	29.7682	29.9985	29.5058	29.4724	29.6481	29.6443	29.5028	29.2195	29.1716	29.7662	30.2065	29.7855	29.7909
AL1L2_HUMAN	Mitochondrial 10-formyltetrahydrofolate dehydrogenase	28.3352	28.4907	28.7124	28.3318	28.4631	28.8829	28.7496	28.437	28.7869	28.9027	28.7216	28.8087	28.7526	28.8884	28.4707	27.5002	28.2635	28.5485	28.3714	28.2086	28.6575	28.4177	28.3016	28.6209	28.586	28.6166	28.4441	28.6567	28.6636	28.7399	28.7987	28.949	28.8021	28.6133	28.5493	28.5679	28.7068	28.5145	28.3174	28.6833	28.5022	28.5592	28.3392	27.9266	28.868	29.0227	28.9895	28.8018
AL5AP_HUMAN	Arachidonate 5-lipoxygenase-activating protein	28.4603	28.7341	28.8302	28.4135	29.0325	29.0787	29.1522	29.0977	28.5029	29.1406	29.1917	28.7033	28.8798	29.0682	28.8108	29.1185	28.3447	28.5464	28.6768	28.8498	28.5024	28.6145	28.4297	28.7333	28.8355	28.5653	28.0651	28.6164	28.4815	28.4024	28.4439	28.6064	28.9245	27.7545	27.4061	28.1811	28.3967	28.4307	28.7569	28.5192	28.8922	28.7494	28.6673	28.631	29.0925	28.7127	28.6372	29.2711
AL9A1_HUMAN	4-trimethylaminobutyraldehyde dehydrogenase	29.6634	29.7193	29.8856	29.5047	29.6506	29.793	29.8101	29.7185	29.7165	29.7338	29.9424	29.8582	29.4362	29.8501	29.8979	30.0309	29.6703	29.5612	29.9203	29.4624	29.9104	29.9373	29.8219	29.8931	29.979	29.9713	30.0139	30.0841	29.8042	30.0414	29.9411	30.0589	30.0444	30.1438	30.0799	29.8952	29.9354	29.8243	29.9709	29.8462	29.9148	29.7189	29.7841	29.8515	29.8362	29.9061	29.8979	29.6795
ALDH2_HUMAN	Aldehyde dehydrogenase, mitochondrial	30.7229	30.5655	30.9631	30.5815	30.9112	31.1266	30.7464	30.7832	31.0534	30.9052	31.333	30.9053	30.8474	30.9771	30.6648	30.9173	31.0528	30.9734	31.0657	30.7445	30.8435	30.6674	30.5236	30.8766	30.9771	30.9307	30.8014	30.8913	30.9747	30.9136	31.2335	31.2063	31.1957	30.8406	30.9804	30.9355	31.0537	30.8693	30.7993	30.903	30.9622	30.6738	30.677	30.6245	31.3716	31.4662	31.4763	31.1197
ALDOA_HUMAN	Fructose-bisphosphate aldolase A	35.4632	35.4043	35.4952	35.552	35.3591	35.2823	35.4928	35.4995	35.1228	35.3625	35.5216	35.4384	35.3451	35.4402	35.4542	35.5203	35.3735	35.4409	35.526	35.402	35.5666	35.6911	35.488	35.5996	35.4473	35.5517	35.6038	35.721	35.4503	35.3982	35.4767	35.4737	35.4461	35.7028	35.6309	35.6956	35.4543	35.498	35.6967	35.4976	35.6932	35.8298	35.6071	35.6271	35.513	35.4571	35.7522	35.5418
ALDOC_HUMAN	Fructose-bisphosphate aldolase C	31.6673	31.3568	31.7794	31.7321	31.5106	31.2086	31.3789	31.0984	31.0572	31.0913	31.7089	31.1995	31.2716	31.7039	31.3464	31.6799	31.4738	31.1544	31.8946	31.4687	31.7141	31.8222	31.5998	31.6604	31.5351	31.4882	31.6926	31.8392	31.4228	31.4819	31.803	31.575	31.4267	31.7069	31.5902	31.7878	31.4489	31.5269	31.7509	31.5657	31.9263	31.8815	31.7074	32.0039	31.6358	32.0446	31.9739	31.6039
ALDR_HUMAN	Aldose reductase	30.3049	30.4288	30.509	30.445	30.112	29.9809	30.2008	30.2319	29.7811	30.1375	30.1887	30.3442	30.0563	30.3021	30.2509	30.1933	30.1045	30.2407	30.1228	30.1207	30.3176	30.5026	30.2217	30.321	30.3411	30.1705	30.4062	30.5659	30.2794	30.2599	30.2392	30.278	30.1875	30.4727	30.5301	30.5191	30.305	30.2854	30.4	30.4604	30.2681	30.3238	30.4478	30.1699	30.0655	30.3549	30.4546	30.171
ALG2_HUMAN	Alpha-1,3/1,6-mannosyltransferase ALG2	26.2821	26.3936	NA	26.1828	26.4092	NA	26.6819	NA	26.6068	26.7982	26.5212	26.8283	NA	NA	NA	NA	NA	26.4493	26.5363	NA	26.5268	26.6744	26.7155	26.5355	26.8479	26.718	26.9228	26.1823	26.6546	26.5721	26.8564	26.3695	26.7295	NA	26.5693	26.3665	NA	26.6808	26.7336	26.4332	26.3912	NA	26.3595	26.7434	26.2873	25.5764	26.1606	NA
AMPB_HUMAN	Aminopeptidase B	31.571	31.4814	31.64	31.6739	31.4686	31.2411	31.6034	31.5335	31.2817	31.3762	31.4739	31.4279	31.4951	31.4383	31.5279	31.3705	31.1121	31.2294	31.5256	31.5379	31.6413	31.7062	31.6264	31.6785	31.5407	31.5574	31.7191	31.7013	31.4448	31.4437	31.6642	31.4725	31.4911	31.6754	31.6202	31.6858	31.3063	31.4831	31.6997	31.5537	31.5378	31.6963	31.5319	31.5135	31.3407	31.313	31.7188	31.3696
AMPD3_HUMAN	AMP deaminase 3	27.3157	27.1741	27.4698	27.4044	NA	27.5927	27.1932	27.5034	26.9307	27.2198	27.7848	27.3618	27.7984	27.2162	NA	28.0712	NA	NA	27.4855	27.9835	27.6231	27.4389	27.3488	27.6996	27.4127	NA	27.0367	27.2517	27.5633	26.9029	NA	26.9756	27.2152	26.9537	26.6305	27.7244	26.9562	27.7251	27.5707	NA	27.5692	27.6527	27.3807	27.4842	27.4426	27.4032	27.1764	NA
AMPL_HUMAN	Cytosol aminopeptidase	32.6706	32.6742	32.751	32.6405	32.5547	32.4942	32.5898	32.6412	32.5575	32.5517	32.7739	32.5413	32.6217	32.661	32.7261	32.5757	32.5837	32.427	32.5978	32.6491	32.7062	32.8608	32.8175	32.8748	32.7422	32.7239	32.8988	32.9581	32.7305	32.7353	32.806	32.8257	32.6673	32.9694	32.8443	32.8423	32.6569	32.7865	32.9338	32.8758	32.7616	32.8454	32.7387	32.8909	32.8657	32.8453	32.9764	32.7027
AMPN_HUMAN	Aminopeptidase N	33.9299	33.9921	33.9706	33.918	33.9464	34.0411	33.9212	33.8392	34.1984	33.9825	34.037	33.9886	33.9088	33.9943	33.8109	33.989	33.9979	34.0367	33.9306	33.868	33.8906	33.9989	34.0362	33.9818	34.2103	34.098	33.982	33.9893	34.1671	34.1469	34.0884	34.0931	34.1915	33.9441	34.0338	34.0255	34.1836	33.9454	33.9534	33.972	34.1599	34.0322	33.9846	33.9863	34.2161	34.0425	33.967	33.9717
AMRP_HUMAN	Alpha-2-macroglobulin receptor-associated protein	29.9285	29.9762	29.9779	29.7497	30.0185	29.7998	30.016	29.7677	29.9877	29.8737	29.8966	29.8404	29.5814	29.7798	29.8329	30.097	29.9826	29.7726	29.7267	29.8672	29.9796	29.835	30.0178	30.0154	29.9503	30.0033	29.8546	30.082	29.9739	29.7895	30.2242	30.1481	29.9266	29.8988	29.7008	29.8755	30.1207	30.0945	29.955	29.9598	30.0439	30.1125	30.1895	30.1167	30.2899	29.7729	29.7983	29.9232
AN32A_HUMAN	Acidic leucine-rich nuclear phosphoprotein 32 family member A	31.2596	31.3356	31.1734	31.2479	31.0561	31.1008	31.0882	31.1917	31.0223	31.1979	31.3246	31.3579	31.3318	31.2417	31.322	31.0768	31.0183	31.2566	31.3542	31.182	31.4725	31.4387	31.4742	31.4051	31.2738	31.0344	31.3201	31.3884	31.22	31.2414	31.6335	31.4363	31.2052	31.3313	31.4335	31.3605	31.2679	31.4076	31.4209	31.4498	31.4111	31.4299	31.4517	31.2	31.4812	31.4925	31.5665	31.2201
AN32B_HUMAN	Acidic leucine-rich nuclear phosphoprotein 32 family member B	30.4477	30.6527	30.4769	30.5898	30.5236	30.4611	30.7409	30.5148	30.4911	30.4417	30.5359	30.3823	30.3575	30.4754	30.603	30.455	30.5121	30.5644	30.576	30.5626	30.7553	30.8421	30.7818	30.4675	30.6813	30.6766	30.7143	30.8895	30.6671	30.7313	30.5024	30.5119	30.6425	30.7317	30.6134	30.7085	30.506	30.5018	30.8424	30.6789	30.7082	30.7282	30.6728	30.7092	30.728	30.7244	30.922	30.6971
AN32E_HUMAN	Acidic leucine-rich nuclear phosphoprotein 32 family member E	29.3827	29.341	29.3758	29.3324	29.3562	29.1624	29.378	29.2777	29.1589	29.0091	29.7269	29.2693	29.1235	29.3538	29.5049	28.9483	29.337	29.2406	29.8557	29.309	29.4799	29.4512	29.3014	29.4298	29.4361	29.3389	29.1883	29.4736	29.16	29.2708	29.5839	29.3754	29.2395	29.4072	29.6129	29.3393	28.9969	29.3855	29.6013	29.4766	29.5038	29.554	29.5938	29.5097	29.6713	29.8687	29.5041	29.8622
ANFY1_HUMAN	Rabankyrin-5	27.3704	27.2479	26.8788	27.5029	27.3896	27.3847	26.5021	27.1163	26.7548	27.5738	26.6676	27.1923	27.2778	26.3931	27.0226	NA	27.7705	27.193	26.972	27.0935	26.9724	26.7877	27.1001	27.123	26.6694	NA	27.0386	26.547	26.9008	26.9786	26.5805	27.192	26.9941	26.9494	26.7274	26.828	26.6071	26.8248	26.6072	27.0823	27.0664	26.5841	26.9825	27.1411	26.6585	26.8381	26.6733	26.4786
ANGT_HUMAN	Angiotensinogen	27.3529	27.4006	27.0212	27.152	27.5135	27.8206	27.1765	27.6885	27.8728	27.4576	26.7853	27.2233	28.1313	27.1368	28.0798	27.3306	27.736	27.4075	27.4041	27.4765	27.7936	28.2535	28.1692	28.0351	28.4506	28.1479	27.9972	27.709	27.88	27.8192	27.4138	27.7871	28.3064	27.5949	27.4943	27.8306	27.8154	27.7441	27.4698	28.2049	27.7233	27.3662	27.1934	28.0568	27.3052	27.6351	27.1615	27.4305
ANKL2_HUMAN	Ankyrin repeat and LEM domain-containing protein 2	28.0723	NA	28.2425	27.7932	28.3019	28.301	28.2645	NA	28.2079	NA	28.9196	28.4256	28.2379	28.8134	NA	NA	29.0611	28.4916	28.0985	NA	28.1438	28.8871	27.81	28.4026	28.6165	NA	28.7913	28.7648	28.5584	28.3588	28.2465	NA	29.097	27.9126	28.3254	28.2445	NA	28.4358	28.5256	28.1935	28.3172	NA	28.0144	28.0042	28.4341	28.1616	27.9204	NA
ANM1_HUMAN	Protein arginine N-methyltransferase 1	30.9814	31.3261	31.0741	31.0274	30.8717	30.9163	30.8597	30.6337	30.7811	30.7942	30.8796	30.7902	30.9086	30.8145	30.814	30.8059	30.7453	30.9012	30.8566	30.8499	31.1611	30.9959	31.1424	31.2602	31.0246	30.9137	31.0333	30.9219	30.9116	30.9085	31.1072	30.9536	31.1585	30.9156	31.0999	30.8125	30.948	30.8502	31.0456	31.0028	31.2154	30.9462	31.1222	30.9957	30.9743	30.8882	30.9083	30.9565
ANM5_HUMAN	Protein arginine N-methyltransferase 5	29.6495	29.7088	29.5637	29.6482	29.4538	29.4222	29.5179	29.7003	29.4205	29.3268	29.5834	29.3359	29.4425	29.6183	29.2535	28.5731	29.1868	29.1799	29.5643	29.4166	29.7829	29.8571	29.7969	29.8068	29.6819	29.6784	29.8313	29.6727	29.496	29.5379	29.5851	29.8365	29.6827	29.7456	29.6377	29.7791	29.5389	29.5697	29.7287	29.6112	29.1862	29.5161	29.5419	29.5457	29.0953	29.3125	29.4092	29.2542
ANO6_HUMAN	Anoctamin-6	27.9332	27.8982	28.4854	28.3055	28.5064	28.1773	27.9349	28.0732	28.2524	28.2689	28.4099	28.1568	28.2057	28.5142	28.4095	NA	28.6868	28.4612	28.451	28.1166	28.251	28.1148	28.2204	28.046	28.1362	28.3098	28.2308	28.0011	28.42	28.444	28.4917	28.3704	28.5521	28.2154	28.4026	28.1244	28.4253	28.1806	27.9743	28.407	28.3235	28.1376	27.9164	28.182	28.3624	28.3167	28.2639	28.388
ANX11_HUMAN	Annexin A11	31.3098	31.5342	31.6274	31.5382	31.3007	31.2185	31.6471	31.5147	31.1254	31.4112	31.5369	31.4326	31.3618	31.5292	31.5083	31.3706	31.3587	31.3658	31.4808	31.4408	31.5801	31.6041	31.4267	31.5607	31.4623	31.4705	31.5653	31.5892	31.3883	31.4199	31.6366	31.5162	31.2582	31.5255	31.4659	31.4848	31.4303	31.4104	31.648	31.4918	31.588	31.7564	31.7263	31.5857	31.6921	31.6694	31.879	31.7007
ANXA1_HUMAN	Annexin A1	32.9879	33.1243	33.0947	33.1995	32.928	32.9269	33.3103	33.1183	32.8324	32.9633	33.1485	33.0111	33.1064	33.2242	33.2028	32.8225	32.8939	32.9365	33.1293	33.1332	33.1827	33.2799	33.0279	33.2182	33.0129	33.039	33.1921	33.2811	32.9295	33.0065	33.26	33.2189	32.9588	33.1848	33.2835	33.1717	32.8275	33.0241	33.2505	33.023	33.2334	33.292	33.1294	33.141	33.2017	33.0544	33.2015	33.4176
ANXA2_HUMAN	Annexin A2;Putative annexin A2-like protein	35.3686	35.3441	35.5187	35.3924	35.2381	35.2046	35.2843	35.2279	35.3315	35.3411	35.4138	35.311	35.3244	35.3183	35.285	35.2013	35.3313	35.31	35.478	35.3175	35.3543	35.3254	35.3793	35.462	35.3617	35.3453	35.3755	35.3703	35.341	35.3032	35.4528	35.3364	35.2627	35.3275	35.4014	35.3169	35.4577	35.2064	35.3526	35.3132	35.6135	35.4573	35.5821	35.5133	35.6817	35.5777	35.4472	35.4429
ANXA4_HUMAN	Annexin A4	32.0293	32.1699	32.197	32.0749	31.9508	31.9189	32.2099	32.1017	31.7559	31.9781	32.1929	32.0205	31.9834	32.2978	32.2212	32.0599	32.0077	32.0177	32.3181	32.08	32.0217	32.1742	31.9117	32.1282	32.0424	31.9273	32.0903	32.1696	31.8505	31.749	32.1445	32.0809	31.9638	32.1666	32.0424	32.1785	32.0779	31.9095	32.0872	31.9707	32.2798	32.3521	32.2602	32.0639	32.0559	32.1195	32.0855	32.2361
ANXA5_HUMAN	Annexin A5	34.2413	34.185	34.2906	34.3509	34.0575	33.9311	34.3147	34.1862	33.9864	34.0177	34.1318	34.1211	34.1426	34.2572	34.1556	33.7491	33.8237	34.0269	34.329	34.0557	34.2286	34.3633	34.155	34.3221	34.0621	34.0646	34.2019	34.1765	33.8891	33.9218	34.1572	34.0655	34.0518	34.236	34.216	34.1822	33.7848	33.9379	34.1412	34.0111	34.1476	34.195	34.0643	34.1217	33.9288	33.9627	34.0683	34.1505
ANXA6_HUMAN	Annexin A6	32.9681	33.1176	33.1684	33.1726	32.9601	32.9019	33.2001	33.0294	32.7748	32.892	33.139	32.9201	33.0742	33.1959	33.0391	33.0228	32.913	32.9117	33.0995	33.1465	33.0505	33.2141	33.0204	33.1711	33.1586	33.1538	33.1497	33.2685	32.8537	33.0103	33.1853	33.0846	33.0669	33.1627	33.1812	33.1894	32.9855	32.9879	33.2199	33.0366	33.2108	33.1585	33.07	33.0387	33.1016	33.1439	33.0956	32.9609
ANXA7_HUMAN	Annexin A7	30.3187	30.3493	30.2375	30.3155	30.4381	30.2215	30.2943	29.9814	29.9947	30.1461	30.1831	30.212	29.8506	30.1847	30.0536	29.8614	29.7492	30.0056	30.1075	29.9955	30.2613	30.2583	30.1627	30.1838	30.088	30.099	30.0997	30.3968	29.8783	29.8032	30.1653	29.8897	30.002	30.1441	30.0804	29.9856	29.9249	30.006	30.245	29.9475	30.0058	30.3305	29.9234	30.1338	30.1055	30.0748	30.3657	29.7378
AP1B1_HUMAN	AP-1 complex subunit beta-1	30.3997	30.4463	30.298	30.4464	30.2873	30.2665	30.4288	30.4027	30.1955	30.5418	30.475	30.187	30.4382	30.2562	30.4464	30.2741	30.3975	30.3557	30.2773	30.4662	30.377	30.3911	30.416	30.4071	30.4051	30.3044	30.3415	30.3411	30.2697	30.1806	30.446	30.1618	30.2357	30.4445	30.2473	30.2544	30.1057	30.3019	30.3021	30.2642	30.4086	30.4213	30.6441	30.4679	30.4272	30.0811	30.1094	30.6224
AP1G1_HUMAN	AP-1 complex subunit gamma-1	30.0576	30.0581	30.1276	29.9867	29.8588	29.8068	30.2485	29.96	29.955	29.8591	29.7987	29.8479	29.9252	29.7832	29.9811	29.7777	29.7891	29.8746	29.8598	29.9467	30.0233	29.9418	29.9045	29.9468	30.1009	29.8046	29.9027	29.8555	29.8412	29.8581	29.8442	29.7121	29.8305	29.7676	29.7498	30.0065	29.6761	29.7701	29.8018	29.8728	29.9699	30.0293	30.0928	29.9057	29.8031	29.861	29.635	30.0368
AP1M1_HUMAN	AP-1 complex subunit mu-1	28.3186	28.2763	28.0694	28.0104	28.1806	27.9383	27.9811	28.4347	28.0512	28.2803	28.0822	28.204	27.3665	28.0597	28.0963	NA	28.1782	27.7446	27.9133	28.0962	28.3207	28.6943	28.3488	27.9128	28.1794	28.3827	28.4404	27.5815	28.2834	28.1967	28.0246	27.9993	28.3693	28.1959	28.6999	28.0559	28.1931	28.4155	28.2732	28.0589	27.6341	28.4221	27.9455	28.1467	27.4862	28.1899	27.8926	27.2303
AP2A1_HUMAN	AP-2 complex subunit alpha-1	30.7073	30.942	30.8058	30.8613	30.727	30.8567	30.9864	30.7187	30.9874	30.7652	30.7677	30.7702	30.7313	30.9662	30.9146	30.6238	30.8014	30.8135	30.7364	30.6531	30.716	30.853	31.0028	31.0449	31.0396	30.9302	30.8763	30.9125	30.9033	30.8132	30.9408	30.8885	30.9843	31.0008	30.7782	30.8271	30.9366	30.8178	30.7533	30.8484	30.8161	30.8266	30.8818	30.7871	30.7632	30.8511	30.8711	30.8667
AP2A2_HUMAN	AP-2 complex subunit alpha-2	31.7607	31.7134	31.7881	31.8129	31.7724	31.6543	31.7266	31.7403	31.7679	31.8256	31.6045	31.6486	31.821	31.6757	31.7383	31.635	31.6617	31.7212	31.6836	31.7915	31.8108	31.747	31.7006	31.7733	31.9913	31.7958	31.6899	31.6478	31.8302	31.7021	31.5489	31.6416	31.6882	31.7978	31.4821	31.7473	31.7705	31.6367	31.7405	31.7368	31.7845	31.6452	31.6552	31.6546	31.7106	31.6583	31.5656	31.6602
AP2B1_HUMAN	AP-2 complex subunit beta	32.0265	32.0833	32.0678	32.0361	31.9741	31.9374	31.9725	31.9463	32.0385	31.9959	31.908	32.0029	32.0438	31.9435	32.1114	32.1117	32.0349	31.9301	32.0685	32.1032	32.0953	32.0716	32.2029	32.0712	32.2182	32.1136	32.1942	32.2306	32.163	32.1096	32.3096	32.0483	31.9999	32.1718	31.9491	32.0598	32.1328	31.9934	32.0213	31.9991	32.2179	32.0826	32.2477	32.1067	32.2601	32.2225	32.0733	32.1168
AP2M1_HUMAN	AP-2 complex subunit mu	30.1583	30.2406	30.2217	30.0864	30.3027	29.8778	30.01	30.0735	30.2476	29.9489	30.2759	30.1641	30.0396	30.1496	30.2806	30.2147	29.9566	29.8998	29.8557	30.1411	30.0851	30.0847	30.2038	30.0242	30.1311	30.2113	30.1901	30.1917	30.2311	30.2447	30.1148	30.2015	30.5358	30.4229	30.1465	30.1104	30.232	30.1762	30.1964	30.1504	30.381	30.2189	30.4099	30.3456	30.2663	30.1327	30.2427	30.2019
AP2S1_HUMAN	AP-2 complex subunit sigma	27.6518	27.9174	NA	27.9373	28.2059	28.3795	NA	28.7382	28.3372	NA	28.3537	27.6361	28.328	27.5107	27.7767	28.7325	27.2882	27.8021	27.8784	28.2747	28.6735	28.4008	28.3935	28.1123	28.6071	28.4421	28.3404	28.5104	28.3767	28.3581	28.2615	28.4476	28.2557	28.7412	28.2026	28.4077	28.1225	28.1347	27.7766	28.356	27.9806	27.9844	27.8945	28.0009	28.3049	28.3351	28.1541	28.6285
AP3B1_HUMAN	AP-3 complex subunit beta-1	28.8741	28.895	28.8989	29.0663	28.8433	28.8408	28.9202	29.0698	28.7796	28.8367	28.947	28.6108	29.0196	29.0144	28.9022	28.8921	28.7521	28.559	28.9067	28.8756	29.1511	29.2898	29.2972	29.1533	29.1386	29.0915	29.4214	29.2997	29.0324	29.0925	29.1227	28.9941	29.2813	29.3787	29.281	29.4104	29.0053	29.1304	29.3923	29.1941	28.9478	29.2121	29.1183	29.2088	29.1755	29.3247	29.0877	28.9617
AP3D1_HUMAN	AP-3 complex subunit delta-1	29.0674	29.1925	29.0047	29.2515	29.0161	28.8287	29.435	29.1188	28.7167	28.8329	28.8707	28.8884	28.9944	29.0448	29.272	28.7793	28.7146	28.5919	29.2581	28.8426	28.9598	28.9584	29.179	29.5724	29.4799	29.1307	29.068	28.8912	29.0322	28.8835	29.0433	29.0084	29.3236	29.1076	28.9843	29.1785	28.7282	28.8854	29.117	29.1354	29.3007	28.9795	28.7685	28.8481	29.1223	29.3052	28.8422	29.189
AP3M1_HUMAN	AP-3 complex subunit mu-1	28.1364	28.215	28.7115	28.3249	28.3304	28.1437	28.1303	28.0993	27.4893	27.9074	28.3166	27.9605	27.4667	28.1551	27.9008	27.5574	27.6468	28.0249	28.3382	28.2461	28.2423	28.4809	28.1838	28.708	28.3608	27.9976	27.9152	28.2333	28.038	28.1155	28.4673	28.2576	28.0349	28.1182	28.1187	28.0219	27.9669	27.9122	28.3944	28.2109	28.2736	28.4952	28.4245	28.1692	28.2799	28.4724	28.2373	28.4596
APAF_HUMAN	Apoptotic protease-activating factor 1	25.6868	25.0403	24.5795	25.5315	25.4745	25.1891	26.7064	25.9158	25.2297	25.2711	24.7051	24.8041	25.7324	24.7565	26.1118	25.3462	25.1384	25.2615	25.1039	25.5782	25.3302	25.4616	25.7677	25.3451	25.8464	25.824	25.9048	26.1297	25.384	26.0052	24.4359	25.3486	25.8034	26.1594	25.6553	25.7039	25.1526	25.572	25.3372	25.656	NA	24.8727	25.1494	27.2394	23.9481	25.6377	25.2345	25.1308
APEX1_HUMAN	DNA-(apurinic or apyrimidinic site) lyase	31.6592	31.5995	31.8335	31.7898	31.6164	31.3755	31.6765	31.7364	31.5381	31.5677	31.7189	31.7807	31.843	31.7552	31.7471	31.4051	31.3781	31.5266	31.7927	31.8608	31.6376	31.8343	31.6092	31.5122	31.5478	31.5897	31.6714	31.733	31.4925	31.5988	31.6759	31.473	31.5221	31.6945	31.7225	31.8721	31.5632	31.7068	31.6763	31.7239	31.7127	31.802	31.6915	31.3381	31.529	31.5251	31.841	31.5186
API5_HUMAN	Apoptosis inhibitor 5	30.4508	30.6071	30.6827	30.4567	30.428	30.4771	30.4062	30.6356	30.4637	30.4366	30.4163	30.3167	30.4932	30.5587	30.4617	30.6631	30.5052	30.4062	30.4463	30.4329	30.5687	30.6945	30.7002	30.6215	30.5968	30.7257	30.498	30.7011	30.6209	30.4627	30.7046	30.6591	30.6224	30.5502	30.5797	30.5737	30.5821	30.6126	30.7359	30.5985	30.705	30.4711	30.6008	30.61	30.5981	30.4862	30.4804	30.4826
APMAP_HUMAN	Adipocyte plasma membrane-associated protein	29.2887	29.5153	29.4074	29.3515	29.5338	29.7595	29.5788	29.3065	29.3422	29.6314	29.4785	29.4009	29.7061	29.6208	29.2849	29.8655	29.6206	29.5035	29.3262	29.7449	29.6133	29.2568	29.4823	29.5891	29.5697	29.8094	29.2682	29.681	29.7167	29.6656	29.6944	29.8287	29.7948	29.4004	29.7649	29.7752	29.4429	29.585	29.4741	29.7971	29.837	29.5651	29.8274	29.4932	29.7705	29.5208	29.7065	30.0447
APOBR_HUMAN	Apolipoprotein B receptor	30.2971	30.4176	30.4557	30.3766	30.1928	30.2473	30.3259	30.1125	30.4055	30.3534	30.1747	30.3597	30.3832	30.1184	30.0982	29.8319	30.2854	30.2989	30.4124	30.5094	30.2681	30.3693	30.281	30.457	30.3335	30.245	30.2858	30.4928	30.3366	30.24	30.6338	30.2437	30.0584	30.2432	30.2068	30.3274	30.4321	30.2813	30.2171	30.336	30.6115	30.5398	30.7873	30.61	30.565	30.1147	30.4532	30.1736
APOC2_HUMAN	Apolipoprotein C-II	31.556	31.7039	31.6745	31.3764	31.5958	31.734	31.8596	31.7866	31.8516	31.6645	31.3883	31.461	31.7225	31.8504	32.0223	32.0132	31.762	31.9255	31.8477	31.6988	31.4845	31.5266	31.4696	31.5765	31.8392	31.6898	31.488	31.8829	31.7919	31.7521	32.0169	31.7492	31.2627	31.6447	31.479	31.6424	31.9067	31.7263	31.6025	31.6375	31.8229	31.9002	31.8909	31.5861	31.9675	31.8287	31.8428	32.2775
APT_HUMAN	Adenine phosphoribosyltransferase	31.5108	31.4694	31.4096	31.4509	31.2628	31.261	31.6315	31.8333	31.2376	31.4851	31.1883	31.4338	31.4289	31.5592	31.6385	31.2204	31.4134	31.4699	31.2639	31.5732	31.6189	31.8271	31.5453	31.6039	31.4626	31.5264	31.714	31.5439	31.3348	31.4163	31.4258	31.5339	31.5042	31.7142	31.6507	31.7997	31.2954	31.5107	31.5896	31.3816	31.201	31.6828	31.2745	31.4209	31.4248	31.2724	31.4731	31.6545
AQR_HUMAN	Intron-binding protein aquarius	28.8117	28.7445	28.537	28.8425	28.9826	28.816	28.311	28.9611	29.0028	28.783	28.2489	28.9675	28.8223	28.614	28.8761	28.7143	28.9563	28.9575	28.5411	28.6819	28.687	28.8851	28.9598	28.5602	28.8406	29.0542	28.8839	28.6019	28.7572	29.0073	28.8205	28.665	28.8943	28.8627	28.9368	28.7988	28.9523	29.0259	28.4277	28.9337	28.2505	28.5465	28.3336	28.7531	28.4716	28.6096	28.4907	28.2395
AR6P1_HUMAN	ADP-ribosylation factor-like protein 6-interacting protein 1	30.1888	29.8297	29.5447	30.0233	30.0692	29.9421	29.8056	29.8154	29.8664	30.0048	29.571	29.8169	30.0646	29.7022	29.9244	29.6941	30.1203	30.0712	29.4186	29.7703	29.9826	29.9844	29.8496	30.0267	30.1533	30.2051	29.6734	30.1577	30.1487	30.1684	30.4745	30.158	29.9806	29.9706	29.8798	29.941	30.101	29.9997	30.1778	29.9473	30.3351	30.0107	30.0068	30.0909	30.07	30.0611	29.9937	29.8171
ARAP1_HUMAN	Arf-GAP with Rho-GAP domain, ANK repeat and PH domain-containing protein 1	27.2237	27.7563	27.9258	27.9055	27.2209	27.76	28.2777	28.0144	27.4926	27.5444	27.7532	27.5777	28.1895	28.1794	28.1721	NA	27.7997	27.7154	27.7806	27.7409	27.434	27.7524	28.1249	27.9901	27.809	27.6455	27.6053	NA	NA	27.7461	27.9268	27.7484	NA	27.7749	27.9395	27.7982	NA	28.0261	27.5598	27.8019	27.6755	27.5774	27.6214	27.3553	27.9482	28.0042	27.8203	27.8032
ARBK1_HUMAN	Beta-adrenergic receptor kinase 1	28.4032	28.4281	28.2728	28.3709	28.3391	28.362	28.6788	28.4282	27.9937	28.2807	28.182	28.5595	28.1161	28.3138	27.9771	NA	27.3313	28.0651	28.1861	28.3919	28.4204	28.4132	28.5134	28.3756	28.2883	28.1419	28.3386	28.3476	28.0511	28.0932	28.3068	28.0343	28.2436	28.3129	28.1979	28.5759	27.9037	28.032	28.1428	28.0349	28.1455	28.4481	28.1525	28.6575	28.1421	28.087	28.0383	28.2696
ARC1A_HUMAN	Actin-related protein 2/3 complex subunit 1A	29.1012	29.2871	29.1735	29.2241	29.0525	29.2631	29.3096	28.9451	28.9798	29.0687	28.9704	29.2153	29.1878	29.1875	29.2373	29.3352	28.8507	29.0136	29.2275	29.3826	29.3657	29.395	29.5591	29.4081	29.3651	29.298	29.4412	29.1889	29.254	29.2018	29.3535	29.05	29.2665	29.3774	29.1387	29.4346	29.1006	29.0851	29.3373	29.3681	29.152	29.2353	29.1964	29.2543	28.9492	29.11	29.1832	29.2753
ARC1B_HUMAN	Actin-related protein 2/3 complex subunit 1B	33.1689	33.0937	32.9187	33.2594	33.0818	32.7125	33.0339	32.9538	33.0812	32.7764	33.0426	33.0745	32.9231	32.8056	33.0134	32.8046	32.7391	32.801	32.9601	32.8885	33.1895	33.242	33.1328	33.0403	33.0588	32.9885	33.2028	33.0628	32.8772	32.8554	32.7292	32.8732	33.0665	33.0861	33.0865	32.9224	32.8023	32.9872	33.0595	33.0013	33.1534	33.4224	33.2103	33.2693	32.8686	32.8257	33.0734	32.8372
ARF1_HUMAN	ADP-ribosylation factor 1;ADP-ribosylation factor 3	32.701	32.6193	32.5043	32.7586	32.5055	32.6469	32.6796	32.4955	32.474	32.6197	32.7372	32.6311	32.7773	32.8763	32.8883	32.2112	32.2758	32.3702	32.6777	32.5873	32.6472	32.7151	32.6594	32.5785	32.5855	32.7222	32.8274	32.6602	32.5652	32.5514	32.6165	32.6281	32.8722	32.6275	32.9338	32.8416	32.4932	32.6573	32.7312	32.7922	32.8547	32.7726	32.5289	32.5071	32.6281	32.8268	32.6537	33.0712
ARF4_HUMAN	ADP-ribosylation factor 4	30.1848	30.2662	29.9863	30.5107	30.4021	29.7584	29.7892	29.733	29.9238	30.2169	29.9971	29.9704	29.72	30.3372	30.0337	29.5207	30.0693	30.0661	30.1618	29.8776	30.1244	30.2645	30.1224	29.9244	30.0021	29.8662	30.1998	30.2207	30.0349	30.0636	30.2521	29.9643	29.8906	29.8985	30.1724	30.3268	29.8968	30.0088	30.3134	30.1696	29.9643	30.3038	30.0377	30.0869	30.1031	29.8492	30.3042	30.0461
ARF5_HUMAN	ADP-ribosylation factor 5	28.519	28.0998	26.882	28.4575	28.7007	28.1441	27.1397	29.2699	28.2422	28.4452	28.265	28.8917	28.3982	28.457	28.3967	27.9687	27.5058	28.2522	27.265	29.5608	29.135	29.3798	29.085	28.4152	28.9265	28.9029	28.6323	27.8466	28.9214	29.2446	27.8339	28.3807	29.393	28.5751	29.3058	29.3018	29.0991	28.9706	28.8703	29.033	28.4697	28.3106	27.8591	28.0367	28.2598	28.4529	27.4534	27.6659
ARF6_HUMAN	ADP-ribosylation factor 6	28.8366	28.8101	28.6073	28.6941	28.6498	28.3141	28.4199	NA	28.762	28.4567	28.4644	28.6996	28.6303	28.6111	28.1026	NA	28.5793	28.3967	28.7532	28.3532	28.5949	28.474	28.516	28.3322	28.8001	28.5906	28.8139	28.434	28.4802	28.4777	28.5362	28.6345	28.9724	28.634	28.8226	28.6542	28.8163	28.8081	28.4536	28.6862	29.1945	28.64	28.8347	28.6603	28.691	28.6925	28.4068	28.5645
ARFG2_HUMAN	ADP-ribosylation factor GTPase-activating protein 2	27.2073	27.6893	27.6064	27.3465	27.6344	27.521	27.7913	27.3237	26.4878	27.5933	27.5727	27.471	27.5922	27.4432	27.6137	27.5774	NA	27.5125	27.7197	27.6924	27.3062	27.42	27.6421	27.4895	27.2354	27.5589	27.1832	27.4785	27.3322	27.3439	27.7673	27.4948	27.3449	27.5344	27.379	27.4618	27.3753	27.1637	27.398	27.5321	27.4234	27.3916	27.6427	27.4987	27.6865	27.5081	27.5302	27.3369
ARFP1_HUMAN	Arfaptin-1	26.5551	26.5678	26.3602	26.7312	26.4088	26.9877	26.5171	26.3354	26.0422	26.2606	25.7193	26.366	26.7733	26.1861	25.3835	NA	NA	26.3418	26.8642	25.8472	25.9947	25.6	25.5677	25.4221	NA	24.7125	26.5131	NA	26.1817	25.7561	NA	NA	25.6	26.1884	NA	26.6134	26.0097	26.5179	25.4482	NA	NA	25.3082	25.8805	26.3576	25.0481	26.5679	26.4238	NA
ARHG1_HUMAN	Rho guanine nucleotide exchange factor 1	29.6272	29.5406	29.5155	29.9392	29.6286	29.3923	29.4682	29.9217	29.5045	29.6107	30.0398	29.5192	30.1776	29.214	29.7534	29.1532	29.2945	29.5625	29.8303	29.6222	29.619	29.8665	29.6873	29.8043	29.5362	29.5335	29.6094	29.6052	29.4937	29.4242	29.5631	29.4664	29.6267	29.7214	29.523	29.8059	29.3576	29.5544	29.7576	29.4861	29.3885	29.9791	29.5644	29.7405	29.5443	29.4831	29.3944	29.3143
ARHG2_HUMAN	Rho guanine nucleotide exchange factor 2	30.8591	30.801	30.7732	30.6818	30.8483	30.8588	30.747	30.8264	30.5968	30.8046	30.861	30.8873	30.9448	30.7935	30.7632	30.6896	30.5998	30.6828	30.8542	30.8754	30.904	30.9607	30.9457	30.9505	30.9378	30.8588	31.0793	31.0146	30.852	30.8338	30.8875	31.051	30.9751	30.9629	31.0649	30.8924	30.7506	30.7984	30.9652	30.8849	30.9699	31.0108	30.8743	30.9786	30.8908	30.923	31.0352	30.9796
ARHG6_HUMAN	Rho guanine nucleotide exchange factor 6	27.0761	27.4293	27.0478	27.4549	27.6214	27.233	27.0456	27.5716	27.5846	26.8093	NA	27.0842	27.1067	27.0677	27.5879	NA	NA	27.5165	27.2958	27.5482	27.0807	27.3189	27.3123	27.1318	27.5728	26.7307	26.9534	26.9713	27.0373	27.0191	27.0102	26.9517	27.2286	27.1001	26.8082	27.2395	27.0054	27.0064	27.0006	27.0938	26.8691	27.1927	27.0059	27.0999	27.4514	27.1117	26.9084	26.7819
ARHG7_HUMAN	Rho guanine nucleotide exchange factor 7	27.7701	27.6767	27.7791	27.6875	27.1216	28.0293	28.0272	28.4844	28.4897	27.4905	27.5652	27.4426	27.7203	28.6291	27.2106	NA	27.4093	28.0794	27.2514	27.6133	27.1108	27.486	27.7554	27.6517	27.5863	27.5022	27.4406	27.3551	27.6594	27.8257	27.6178	27.5942	27.445	27.804	27.4218	27.6908	27.019	27.4696	27.4584	27.1972	27.8767	27.6845	27.9942	27.5087	27.2003	27.5183	27.8254	27.8905
ARK72_HUMAN	Aflatoxin B1 aldehyde reductase member 2	29.5753	29.7345	29.7388	29.5867	29.6569	29.5298	29.9359	29.8453	29.6621	29.4748	29.8484	29.6562	29.5991	29.5072	29.7792	29.4936	29.6147	29.446	29.7256	29.6164	29.4682	29.5609	29.5635	29.4835	29.5307	29.4169	29.692	29.5681	29.4266	29.2996	29.4373	29.5844	29.7066	29.8056	29.6798	29.7206	29.442	29.6643	29.5501	29.5623	30.1363	29.9448	29.9509	29.8446	30.0899	29.7882	29.8005	29.4787
ARL1_HUMAN	ADP-ribosylation factor-like protein 1	28.3479	28.3106	28.3033	28.4276	28.4511	28.568	28.0787	28.3388	28.3552	28.3319	28.2852	28.4233	28.3567	28.6466	28.0498	27.6896	28.3026	28.5461	28.1864	27.9457	28.3424	28.4557	28.3945	28.4664	28.5122	28.1185	28.2604	28.3452	28.2772	28.2717	28.7179	28.4522	28.5914	28.3566	28.3635	28.3131	28.3984	28.416	28.0789	28.5406	28.238	27.808	28.1799	28.0916	27.929	28.1729	27.5681	28.1475
ARL8B_HUMAN	ADP-ribosylation factor-like protein 8B	30.6987	30.6242	30.5212	30.8052	30.8163	30.8601	30.5056	30.8827	30.7533	30.8153	30.8653	30.8144	30.8673	30.6711	30.7742	30.4775	30.8326	30.7342	30.66	30.7815	30.8725	30.8948	30.8544	30.9034	30.9911	30.9646	30.69	30.7823	31.1461	31.0497	30.7811	31.051	31.2253	30.8821	31.0531	30.9001	30.8318	30.8743	30.9093	30.7586	30.7069	30.8478	30.5291	30.5587	31.3576	30.8601	30.6772	31.0619
ARMC1_HUMAN	Armadillo repeat-containing protein 1	NA	27.8638	28.0145	27.8572	27.699	NA	NA	27.6318	NA	27.7304	NA	NA	27.908	28.0058	NA	NA	NA	27.8309	NA	27.8651	28.0466	27.92	28.1617	27.8418	28.1231	27.8586	28.2396	28.0021	27.8887	27.8988	27.9218	28.0614	27.8962	27.9724	27.982	NA	28.0787	28.1179	27.9395	28.1862	27.2682	27.5098	27.6993	27.7133	27.7946	28.2058	27.7163	NA
ARMC8_HUMAN	Armadillo repeat-containing protein 8	27.9441	26.9324	26.8644	28.0878	28.0129	27.5651	26.4492	27.9246	27.3791	27.796	26.8544	27.9614	27.6933	26.9264	27.2307	27.0496	27.888	27.6647	27.1358	27.3254	27.5192	27.1489	27.105	27.0678	26.9707	26.1931	27.3417	26.3816	27.5654	26.9952	26.2768	26.5945	27.1015	27.3883	26.2832	26.5702	27.103	27.3763	26.7225	26.99	26.4807	26.8028	26.4756	27.2103	26.7004	26.8249	26.6885	26.6048
ARMC9_HUMAN	LisH domain-containing protein ARMC9	27.2027	NA	26.8544	27.2571	26.9773	26.9035	27.381	NA	27.1771	26.9961	26.727	26.9519	26.8647	27.1604	27.1858	NA	26.8417	27.1299	26.6678	26.3534	26.9903	27.2511	26.9076	26.8439	26.8322	26.8136	26.9483	27.2817	27.0056	26.8435	27.1896	26.7301	26.5291	27.2668	26.8673	26.9986	26.5025	26.6999	27.1949	27.0825	26.7808	26.3812	27.036	27.1038	26.5369	27.4002	26.6477	26.9384
ARMT1_HUMAN	Protein-glutamate O-methyltransferase	27.1269	NA	27.3344	27.4092	NA	27.2373	NA	NA	NA	NA	NA	26.9953	26.9503	NA	NA	NA	NA	NA	NA	NA	27.2653	27.5017	27.023	27.1444	27.0304	NA	NA	27.1164	26.9623	27.2291	NA	27.5988	27.1856	NA	27.9472	NA	26.8099	27.3368	27.2882	NA	26.9006	27.4533	NA	27.0251	26.4885	NA	NA	NA
ARP2_HUMAN	Actin-related protein 2	32.452	32.3286	32.21	32.5768	32.3443	32.1555	32.3955	32.2983	32.0652	32.2363	32.3493	32.3969	32.1818	32.1493	32.4725	32.2067	32.1165	32.2077	32.2996	32.2565	32.7574	32.8389	32.6327	32.7643	32.657	32.6303	32.7992	32.6329	32.557	32.5747	32.3372	32.5681	32.6709	32.712	32.7218	32.709	32.4922	32.6907	32.7792	32.6574	32.3401	32.6269	32.4702	32.6176	32.0247	32.2829	32.3302	32.1546
ARP3_HUMAN	Actin-related protein 3	34.0062	34.0014	34.0166	34.0232	33.8871	33.7942	33.9827	33.7713	33.688	33.8306	33.973	33.86	33.8026	34.0016	34.0359	33.8452	33.7696	33.9054	34.0553	33.9251	34.0691	34.1588	34.0505	34.0029	33.8414	33.94	34.0785	34.0618	33.7175	33.8557	34.053	33.8938	33.8609	34.0505	33.9745	34.0656	33.828	33.9141	34.0353	33.9302	34.0775	34.1039	33.8525	34.0696	33.9376	33.8693	33.8904	33.8855
ARP5L_HUMAN	Actin-related protein 2/3 complex subunit 5-like protein	28.1974	28.5604	28.4173	28.467	28.5451	28.2936	28.2084	28.1603	28.7108	28.4063	28.1575	28.3884	28.2841	28.4318	27.8748	28.1794	28.1952	28.3598	28.8263	28.287	28.2897	28.7074	28.8339	28.4763	28.3881	28.2182	28.7119	28.7665	28.4542	28.2194	28.5833	28.337	28.0448	28.7182	28.5868	28.406	28.5122	28.3492	28.7648	28.4555	28.4563	28.644	28.6	28.7694	28.4033	28.5627	28.1344	28.264
ARPC2_HUMAN	Actin-related protein 2/3 complex subunit 2	32.8695	32.8425	32.7999	32.9803	32.7012	32.6418	32.7823	32.8958	32.4966	32.6507	32.6638	32.719	32.8539	32.7991	32.9995	32.6739	32.7377	32.7428	32.7481	32.8126	32.8399	32.9364	32.8775	32.9259	32.8731	32.8694	32.9895	32.8913	32.7156	32.6054	33.0541	32.8211	32.7851	33.0235	32.9073	32.7588	32.6288	32.9022	32.9491	32.8252	33.0665	33.0689	33.0797	32.9939	32.8571	32.8887	32.8362	32.946
ARPC3_HUMAN	Actin-related protein 2/3 complex subunit 3	31.9907	32.3826	32.2404	32.2913	32.08	32.0764	32.3862	32.167	31.9267	31.8298	32.1235	32.0499	32.2521	32.2658	32.1401	31.9955	32.023	32.2206	32.0882	32.2248	32.1322	32.1966	32.1816	32.154	32.0406	32.0314	32.1051	32.3754	31.8916	31.9399	32.26	32.0066	31.7009	32.1521	31.9005	32.1083	31.9404	32.0597	32.0825	32.0094	32.1424	32.4813	32.2813	32.091	32.058	31.9623	32.1678	32.2317
ARPC4_HUMAN	Actin-related protein 2/3 complex subunit 4	32.7444	32.6958	32.8533	32.8366	32.7229	32.4354	32.8282	32.5626	32.4305	32.4029	32.5442	32.5774	32.3611	32.5166	32.5974	32.2883	32.2924	32.2497	32.5816	32.5312	32.7456	32.772	32.6542	32.855	32.5599	32.279	32.6412	32.7392	32.4426	32.4677	32.6017	32.517	32.6416	32.4859	32.6218	32.6867	32.3452	32.4668	32.519	32.3999	32.7804	32.8966	32.8976	32.7622	32.5364	32.549	32.4273	32.6666
ARPC5_HUMAN	Actin-related protein 2/3 complex subunit 5	31.3531	31.5869	31.5986	31.4833	31.5554	30.8394	31.3235	31.1893	31.3323	31.1006	31.416	31.2386	31.0252	31.4116	31.1952	31.0803	30.9119	31.0056	31.3815	31.0139	31.04	31.1661	31.4308	31.3218	31.2528	31.209	31.3396	31.6582	31.0679	31.2765	31.6916	31.3106	31.1599	31.4109	31.2997	31.4641	31.1967	31.1777	31.1927	31.1179	31.4068	31.5304	31.6082	31.5427	31.595	31.5101	31.5302	31.558
ARRB1_HUMAN	Beta-arrestin-1	28.9183	28.8911	28.9449	28.7411	28.8611	28.5468	28.9485	28.9229	28.6601	28.7053	28.5805	28.6897	29.0929	28.5781	29.3641	28.377	28.9669	28.7246	28.8625	28.9944	28.7526	29.0009	28.9709	28.8891	28.7151	28.8405	29.0519	28.714	28.74	28.5545	28.7457	28.7425	28.6526	29.103	28.8131	28.9622	28.6426	29.0093	28.8606	28.7905	28.6845	28.8935	28.7984	28.8041	29.122	28.9722	28.8535	28.9251
ARRB2_HUMAN	Beta-arrestin-2	27.3957	27.9786	27.626	27.8592	27.4662	27.1446	27.1013	27.8587	27.2619	27.4354	27.1857	27.4441	27.4168	27.2326	NA	NA	NA	27.5075	27.4592	27.7767	27.3188	27.41	27.3713	27.5831	27.4344	27.3202	27.535	27.1932	27.3303	27.4885	27.6297	27.6822	27.8046	27.5425	27.3706	27.3022	27.1694	27.4875	27.6848	27.6555	27.1571	27.2664	27.6099	27.2996	27.2524	27.1515	26.6975	26.8342
ARSA_HUMAN	Arylsulfatase A	27.109	27.8539	27.6433	27.3161	27.3714	27.6343	27.3796	NA	27.4611	27.1186	27.3208	27.3029	27.5876	27.4959	NA	NA	27.5385	27.5234	27.5898	27.6931	27.4845	27.0213	27.2334	27.5379	27.0748	27.1721	26.869	27.2143	27.3246	26.9304	27.1881	27.1239	27.076	27.1829	NA	27.4079	27.2692	26.9654	NA	27.503	27.5847	27.0108	27.6592	27.2368	26.9519	26.4476	NA	27.1572
ARSB_HUMAN	Arylsulfatase B	28.9217	29.2164	29.151	28.9589	28.9627	28.8201	29.3178	28.4706	29.1854	28.6852	28.814	28.932	27.8258	29.1447	28.5888	29.0686	28.3407	28.9503	29.0453	28.4689	28.8624	28.9221	29.1362	29.0656	28.9337	28.8699	28.8242	29.0304	28.851	28.9546	29.1306	28.7411	28.9201	28.8504	28.7594	29.0612	29.0371	29.0394	28.8719	28.9674	28.791	28.82	29.136	28.9759	29.0296	28.8699	28.6435	28.5785
ASAH1_HUMAN	Acid ceramidase	29.4601	29.0958	29.4478	29.3471	29.4012	29.1019	29.8091	29.3419	29.6469	29.4148	29.7388	29.3298	29.5121	29.4853	29.4601	28.609	29.8404	29.5213	29.5127	29.6466	28.9624	29.1789	29.5131	29.4667	29.6339	29.3545	29.0893	29.364	29.3878	29.7141	29.6396	29.4097	29.4799	29.4051	29.2402	29.3831	29.4098	29.5076	29.4376	29.4155	29.5638	29.3342	29.4635	29.644	29.6821	29.4386	29.2915	29.8061
ASC_HUMAN	Apoptosis-associated speck-like protein containing a CARD	30.7864	30.7986	30.9681	30.9161	30.7046	30.5047	31.2252	31.3334	30.6896	30.6651	30.7654	30.8234	30.8198	30.9138	30.986	30.6301	30.5134	30.4657	30.7389	30.7625	30.8009	31.0641	30.9204	30.7168	30.8341	30.6278	30.7145	30.9378	30.3971	30.538	30.7663	30.7731	30.9476	31.036	30.8753	31.171	30.5619	30.8398	30.8759	30.7098	30.6994	31.0612	30.6348	30.4669	30.2871	30.4368	30.1906	30.8418
ASCC2_HUMAN	Activating signal cointegrator 1 complex subunit 2	25.8296	25.5541	25.4646	25.7572	25.9076	25.775	26.078	26.0283	25.9644	25.3779	25.523	25.8203	25.886	25.6473	25.806	NA	25.8254	25.6089	25.7794	25.6118	25.9896	25.9348	26.0029	25.8616	25.7692	26.0088	26.1349	NA	25.8678	25.8887	NA	24.5408	25.796	25.8762	25.8105	25.9469	25.5424	25.6685	25.6307	25.6717	25.59	26.2072	25.707	25.4957	25.24	25.2034	25.0714	25.6331
ASCC3_HUMAN	Activating signal cointegrator 1 complex subunit 3	27.4807	27.1455	27.341	27.5067	27.2281	27.4071	27.3751	27.2501	27.0848	27.1749	27.0562	27.4081	27.6391	27.1178	27.2837	NA	27.3151	27.2606	26.8695	27.4525	27.3843	27.2338	27.0714	27.3665	27.3489	27.1472	27.3973	27.3036	27.282	26.9774	27.2612	27.2185	27.2445	27.2712	27.7379	27.3069	27.1659	27.19	27.3127	27.3804	27.0266	27.1404	27.2496	26.9884	26.8601	27.1605	26.9749	26.9476
ASNA_HUMAN	ATPase ASNA1	29.0518	29.1237	29.2399	29.0428	29.0126	28.9691	29.1403	28.6713	28.7707	28.9337	29.1709	28.9347	29.006	29.0692	28.5238	28.9376	28.7169	28.9932	28.9622	28.7643	29.146	28.9869	29.1222	29.3173	29.0919	28.8251	29.2199	29.1937	28.8879	28.8171	29.2432	28.9873	28.9067	29.1817	29.2381	29.1548	29.075	29.1423	29.2426	28.8586	29.0477	29.2408	28.877	29.1682	28.971	29.0231	29.2212	29.446
ASPH_HUMAN	Aspartyl/asparaginyl beta-hydroxylase	29.8363	29.7165	29.9915	29.7777	29.8652	30.0444	29.8132	29.7651	29.9562	30.1443	30.0457	30.0338	30.1637	29.9611	29.8956	29.9557	30.1611	29.9057	29.8792	29.8431	29.6992	29.7052	29.496	29.8098	29.3978	29.6853	29.1346	29.531	29.8443	29.5304	30.0825	29.8569	29.7844	29.361	29.8065	29.5107	29.5661	29.7191	29.5479	29.6015	30.0394	29.5735	29.689	29.731	29.9814	29.8758	29.8062	30.0832
ASSY_HUMAN	Argininosuccinate synthase	30.6169	30.5694	30.5989	30.5974	30.4252	30.5071	30.7977	30.3899	30.2055	30.5053	30.5175	30.5455	30.3402	30.6218	30.4649	30.4333	30.384	30.3692	30.5585	30.5291	30.6189	30.6671	30.4483	30.5811	30.571	30.3096	30.4788	30.506	30.4242	30.3552	30.5857	30.5727	30.3424	30.5484	30.5676	30.4826	30.1809	30.393	30.6673	30.4862	30.6439	30.621	30.7947	30.6111	30.8406	30.3912	30.4748	30.5302
AT131_HUMAN	Manganese-transporting ATPase 13A1	29.5964	29.4667	29.5419	29.3049	29.7723	29.9693	29.5149	29.9248	29.6366	29.6527	29.6228	29.6395	29.6334	29.9487	29.3085	28.8547	29.4317	29.619	29.5179	29.6719	29.5405	29.42	29.4583	29.741	29.4329	29.4786	29.1827	29.386	29.452	29.359	29.3795	29.4744	29.8063	29.1933	29.5015	29.3681	29.2064	29.5203	29.5631	29.5817	29.6804	29.4892	29.3079	29.5222	29.7314	29.8066	29.5414	29.39
AT133_HUMAN	Probable cation-transporting ATPase 13A3	27.3275	27.2958	27.2148	27.1228	27.2494	27.376	27.5519	27.3573	27.374	27.4307	27.5416	27.4481	27.481	27.4088	27.5614	NA	27.4367	27.4062	27.4089	27.5088	27.372	27.751	27.1905	27.1376	28.0809	27.3743	27.225	27.3848	27.4321	27.1614	27.0003	27.7692	27.2481	27.1557	27.3266	27.2904	27.3983	27.0277	27.2595	27.3776	27.5142	26.8339	27.0186	26.9927	27.0801	27.7693	27.0963	27.0158
AT1A1_HUMAN	Sodium/potassium-transporting ATPase subunit alpha-1	32.4303	32.4022	32.6121	32.371	32.4621	32.5257	32.4298	32.4176	32.5475	32.4836	32.6491	32.4949	32.528	32.6742	32.5133	32.7118	32.6523	32.5743	32.5651	32.5723	32.5447	32.5266	32.5351	32.6667	32.7874	32.6311	32.5472	32.7281	32.7549	32.7717	32.9045	32.8419	32.7862	32.649	32.6352	32.518	32.897	32.6055	32.6246	32.6101	33.0798	32.7185	32.8294	32.5374	33.0885	32.8796	32.8099	32.8715
AT1B1_HUMAN	Sodium/potassium-transporting ATPase subunit beta-1	27.3796	27.6654	NA	27.4967	NA	NA	NA	27.4501	27.4364	27.6628	27.783	27.8216	NA	27.8791	27.5835	NA	27.4163	27.633	27.7434	27.5461	27.4359	27.5037	NA	27.5638	27.6236	27.4032	27.5667	27.517	27.2411	27.5189	27.6568	27.6122	27.6155	27.5756	27.1027	27.8064	27.6479	27.5203	27.3151	27.3105	27.7179	27.4108	27.749	27.3854	27.6196	28.2185	27.796	NA
AT1B3_HUMAN	Sodium/potassium-transporting ATPase subunit beta-3	29.737	30.0492	30.0898	29.9387	30.2392	30.2113	30.0765	30.3189	30.0907	30.1569	30.5026	29.9424	30.426	30.2348	30.2913	30.2026	30.4032	30.0889	30.466	29.9214	30.2628	30.2271	30.4865	30.3053	30.4773	30.4392	30.3454	30.4536	30.5191	30.4175	30.6107	30.415	30.4615	30.5139	30.6227	30.3713	30.5303	30.6284	30.273	30.4662	30.4822	30.0946	30.0863	30.1628	30.3731	30.6042	30.2037	30.2588
AT2A2_HUMAN	Sarcoplasmic/endoplasmic reticulum calcium ATPase 2	32.2198	32.1186	32.3582	32.0667	32.2809	32.5091	32.2084	32.3361	32.2577	32.3858	32.4542	32.314	32.3956	32.5369	32.1005	32.4807	32.3984	32.404	32.2971	32.3343	32.3215	32.2583	32.2084	32.5092	32.3226	32.4317	32.1488	32.5746	32.4939	32.2495	32.5591	32.6303	32.5314	32.1258	32.4721	32.3273	32.3048	32.4456	32.4253	32.3892	32.7723	32.2898	32.4543	32.1374	32.6567	32.609	32.6324	32.6742
AT2B1_HUMAN	Plasma membrane calcium-transporting ATPase 1	28.4277	28.0638	28.2548	28.5538	28.2929	28.5825	28.5165	28.5895	28.5837	28.6212	28.6849	28.528	29.1281	28.8344	28.6924	NA	28.7303	28.9556	28.5436	28.8299	28.3593	28.2418	28.1477	28.2688	28.9419	28.592	28.2519	28.254	28.6195	28.5215	28.2559	28.4521	28.6128	28.1005	28.4416	28.4647	28.3647	28.31	28.2356	28.1728	28.6975	28.5813	28.4574	28.2763	29.25	28.7661	28.6212	28.2192
ATP5E_HUMAN	ATP synthase subunit epsilon, mitochondrial;ATP synthase subunit epsilon-like protein, mitochondrial	29.6999	29.5262	29.9799	29.424	29.8665	30.0271	29.6582	29.4666	29.7505	29.6779	29.562	29.6979	29.6922	29.9713	29.6645	29.9319	30.0437	29.9856	29.4067	29.7975	29.9406	29.5454	29.6168	29.5587	29.5765	29.6772	29.5596	29.7312	NA	29.8617	30.2288	30.1336	29.2938	NA	NA	29.8141	29.8916	29.5743	29.7498	29.5602	29.9506	29.8675	29.9319	29.4604	30.2706	29.9544	30.2934	29.9104
AT5F1_HUMAN	ATP synthase F(0) complex subunit B1, mitochondrial	30.7554	30.3016	30.7557	30.5352	30.8661	31.2352	30.8767	30.8089	30.7897	30.7519	30.7134	30.9139	30.8085	30.7987	30.772	30.8952	30.9897	30.8065	30.6043	30.8992	30.8662	30.8129	30.5643	30.8908	31.1765	30.9205	30.8805	30.8654	30.924	30.8586	30.8274	31.1228	31.2319	30.832	31.1025	30.8532	30.895	30.9647	30.9201	30.9362	31.0904	30.943	30.7048	30.3968	30.9176	30.9614	31.182	30.7827
ATAD1_HUMAN	ATPase family AAA domain-containing protein 1	28.2731	27.9414	27.9783	28.234	28.18	28.3018	28.6815	28.1322	28.703	28.3201	27.2564	28.3286	28.6374	28.0299	28.0156	27.046	27.9778	27.8792	28.1673	27.9824	28.2074	28.0595	28.3868	28.2372	28.1118	28.9528	27.8722	28.0069	27.8099	28.0237	28.2871	28.1222	27.9368	28.5246	27.8543	28.1278	27.968	28.0689	27.7165	28.1246	27.9636	27.9242	28.2186	27.9767	28.215	28.382	28.5022	28.1775
ATAD2_HUMAN	ATPase family AAA domain-containing protein 2	27.8403	27.534	27.944	27.5875	27.9535	27.3783	27.6497	27.7374	28.0596	27.6232	27.3707	27.747	27.7004	27.7026	28.3327	27.3436	27.9503	28.0577	28.074	27.7907	28.3545	28.0234	27.836	28.0076	27.4294	27.8752	27.4809	27.8393	27.7475	28.308	28.5313	28.119	27.5339	27.5655	27.3014	27.4032	27.8669	27.6077	27.0052	27.646	27.5995	27.3739	27.5042	27.8528	28.2005	27.565	28.0939	27.7583
ATD3A_HUMAN	ATPase family AAA domain-containing protein 3A	29.5215	29.3053	29.6095	29.2367	29.7631	29.6491	29.471	29.4176	29.3638	29.4901	29.8661	29.5858	29.4574	29.8315	29.6777	29.8189	29.8211	29.4505	29.7488	29.3742	29.5463	29.3354	29.3185	29.6954	29.5163	29.5269	29.3231	29.7846	29.4452	29.6594	29.6278	29.732	29.8052	29.6673	29.6669	29.6672	29.6364	29.6027	29.6044	29.659	29.5519	29.3711	29.3873	29.1734	29.5927	29.7977	29.8471	30.1164
ATG3_HUMAN	Ubiquitin-like-conjugating enzyme ATG3	28.1757	27.9722	27.8849	28.1692	28.0356	27.8994	28.0111	28.0294	28.3738	27.9168	28.1495	27.8179	27.9153	28.4457	27.84	27.2954	27.3779	NA	27.9946	28.1707	28.3406	28.0882	28.1233	28.1106	28.0487	28.1697	28.0247	27.907	27.7658	27.7272	28.2317	27.9316	27.8945	28.2583	27.9285	28.146	27.9465	27.7114	28.0533	27.8796	28.106	28.7353	28.1675	27.8428	27.7851	NA	28.3109	NA
ATG7_HUMAN	Ubiquitin-like modifier-activating enzyme ATG7	29.1289	28.8051	28.885	29.3494	28.9913	28.8265	28.9444	28.9532	28.9128	28.5661	28.8772	29.1515	28.9913	28.7619	29.1464	28.4527	28.2992	28.6568	28.9716	28.9987	29.1971	29.3765	29.2207	29.0605	29.1391	28.8566	29.0541	29.3985	28.8342	28.8921	28.9379	29.0711	29.0212	29.0693	29.0926	29.0642	28.7587	28.912	29.051	28.9635	28.5195	29.1284	28.8687	28.883	28.9859	29.0731	29.3727	29.0279
ATLA3_HUMAN	Atlastin-3	30.4714	30.5265	30.4302	30.4858	30.7705	30.7054	30.4788	30.7033	30.7515	30.7087	30.6569	30.6097	30.6149	30.727	30.4257	30.6952	30.7179	30.6452	30.5301	30.5412	30.6399	30.46	30.5667	30.4968	30.7533	30.7115	30.4484	30.5074	30.8474	30.6147	30.7386	30.6414	30.7018	30.4947	30.626	30.604	30.6109	30.6189	30.5185	30.654	30.6944	30.2505	30.471	30.4625	30.4666	30.5063	30.4045	30.3275
ATM_HUMAN	Serine-protein kinase ATM	27.4802	26.8817	26.804	26.6705	26.7997	26.7104	26.7266	26.8854	26.6413	26.8622	26.2123	27.0089	26.9978	26.9012	27.6663	26.4054	26.0938	26.9935	26.2443	26.5607	27.4572	26.9171	27.3709	27.4277	26.8322	27.2619	27.099	27.3555	26.7666	27.7623	26.5365	27.914	26.8207	26.8326	26.8869	NA	27.1202	26.6584	27.4591	26.9147	26.3804	26.3449	25.5839	27.2512	26.2507	26.5365	26.8246	25.6859
ATOX1_HUMAN	Copper transport protein ATOX1	28.8328	28.9621	29.379	29.0369	29.0046	28.8311	29.2109	28.8242	28.8254	28.6272	29.0809	28.891	28.9773	28.9449	28.8008	28.4121	28.7751	28.7171	29.2603	28.7452	28.8704	29.0454	29.0645	29.0398	28.7954	28.9058	29.2113	29.0711	28.8551	28.8058	29.1346	29.0093	28.8646	28.9633	29.0431	28.9727	28.8951	28.8085	29.0204	29.0381	28.8677	29.3494	28.8727	28.5743	28.8944	29.5499	29.3486	NA
ATP5H_HUMAN	ATP synthase subunit d, mitochondrial	30.9203	30.8068	31.1271	30.8491	31.0837	31.4186	31.0858	31.0475	31.35	31.1622	31.3523	31.2532	31.1195	31.5226	30.9158	31.0989	31.2742	31.3423	31.1849	31.1464	31.2322	30.9625	30.73	30.9277	31.097	31.2193	31.0366	31.256	31.1966	31.2364	31.1724	31.5024	31.4011	31.0298	31.397	31.2284	31.2517	31.1174	31.2068	31.2779	31.4747	30.8582	30.8546	30.9119	31.8254	31.5112	31.6343	31.3433
ATP5I_HUMAN	ATP synthase subunit e, mitochondrial	28.5154	29.3225	28.9977	29.0666	29.4528	29.6362	29.0844	29.1672	29.3854	29.5497	29.3241	29.2985	29.2922	28.5118	28.5638	28.9338	29.0199	29.2266	29.2415	29.2839	29.5145	29.2616	29.3879	29.4147	29.5775	29.4031	29.252	29.5719	29.4422	29.5152	28.9892	29.5981	29.9011	29.3901	29.4625	29.5303	29.3864	29.5524	29.2874	29.4771	29.3101	29.0061	29.0512	29.1962	29.27	29.6241	29.3776	29.135
ATP5J_HUMAN	ATP synthase-coupling factor 6, mitochondrial	30.0581	29.8984	30.298	29.7384	30.4414	30.2963	30.3286	30.2632	30.1203	30.222	30.1628	30.3892	30.1649	30.4637	29.6559	30.1387	30.4607	30.2972	30.0284	30.0534	30.007	29.7953	29.5328	30.2302	30.2748	30.1576	30.0169	30.0761	29.9942	30.1561	30.5863	30.2648	29.8391	30.077	30.0238	30.0208	30.2418	30.1681	29.9615	30.2934	30.7742	30.2459	30.3707	30.0181	30.8942	30.7937	30.5963	30.1122
ATP5L_HUMAN	ATP synthase subunit g, mitochondrial	30.1952	30.0456	30.71	30.2502	30.7106	30.6671	30.1027	30.1128	30.2726	30.603	30.6462	30.3807	30.1251	30.4913	29.7773	30.2036	30.3067	30.4893	30.5804	30.0868	30.2523	30.3755	30.5189	30.6808	30.6586	30.5279	30.6106	30.5043	30.668	30.651	30.3241	30.7146	30.7961	30.4618	30.5557	30.5137	30.7857	30.6268	30.3143	30.5371	30.4811	30.4665	30.239	30.0366	31.0969	30.5221	31.2702	30.6868
ATPA_HUMAN	ATP synthase subunit alpha, mitochondrial	34.777	34.5159	34.9018	34.6223	34.8629	35.2407	34.7785	34.8663	35.0004	35.0501	35.0572	34.9321	34.8418	34.9291	34.6627	34.8942	34.9964	34.9316	34.7715	34.8087	34.9235	34.8009	34.5653	34.9013	35.1009	35.1307	34.8984	35.0221	35.0859	35.0042	35.1788	35.2825	35.1659	34.8628	35.0958	34.9482	35.2674	35.0052	34.9129	34.9692	35.0406	34.8253	34.7614	34.6965	35.4269	35.3742	35.295	35.1267
ATPB_HUMAN	ATP synthase subunit beta, mitochondrial	35.2889	34.9469	35.3305	35.0857	35.3266	35.6451	35.0885	35.2426	35.4502	35.3725	35.5485	35.3445	35.1085	35.4069	35.0321	35.2118	35.3684	35.299	35.4453	35.1054	35.4225	35.2209	35.075	35.4441	35.4202	35.4916	35.4136	35.4245	35.5498	35.4138	35.6081	35.6237	35.5507	35.3317	35.5444	35.3922	35.6421	35.4248	35.3044	35.4382	35.4333	35.1819	35.0901	35.0974	35.6961	35.8248	35.741	35.5697
ATPD_HUMAN	ATP synthase subunit delta, mitochondrial	29.8025	29.5913	29.9141	29.642	29.7064	30.2094	29.9261	29.8649	29.8079	29.9563	30.1084	29.9362	29.741	29.8685	29.6943	29.917	29.964	30.0044	29.8005	29.8949	29.8874	29.6633	29.5137	30.0221	29.9705	29.9425	29.5921	30.0887	30.0803	29.9734	30.138	30.0655	29.9258	29.8666	30.067	29.7497	30.2217	29.99	30.0521	30.0073	30.4516	30.0144	29.7609	29.7537	30.4929	30.5555	30.5952	30.2795
ATPG_HUMAN	ATP synthase subunit gamma, mitochondrial	31.5309	31.1559	31.5561	31.2343	31.6214	31.8965	31.424	31.5463	31.5463	31.6558	31.7307	31.5976	31.5066	31.6674	31.2729	31.6261	31.69	31.5948	31.392	31.4559	31.7513	31.475	31.5244	31.5845	31.6099	31.8286	31.6198	31.8246	31.714	31.7358	31.7769	31.8404	31.9115	31.6207	31.8727	31.6462	31.8206	31.6236	31.5647	31.6382	31.7582	31.674	31.4189	31.3415	31.9352	32.0657	32.0634	31.8434
ATPK_HUMAN	ATP synthase subunit f, mitochondrial	29.4915	29.2398	29.772	29.5335	29.7059	30.0182	30.0376	30.0409	29.9302	29.8555	30.1366	29.7632	30.0398	30.0088	29.529	29.2807	29.8299	29.6466	30.1163	29.5918	29.7061	29.5924	29.6861	30.1357	30.2568	30.0482	29.555	29.7289	29.5984	29.786	30.0081	30.1658	30.3691	29.4148	30.2002	29.5421	29.9074	30.0005	29.9668	30.0238	30.4217	29.4049	29.2951	29.7992	29.9349	30.3564	29.9037	29.8329
ATPO_HUMAN	ATP synthase subunit O, mitochondrial	32.3243	32.2694	32.4565	32.0991	32.4784	32.7884	32.6046	32.3435	32.6874	32.5185	32.5696	32.4116	32.3105	32.5476	32.1173	32.6108	32.5846	32.6178	32.3699	32.3484	32.3789	32.3743	32.4395	32.6468	32.5548	32.7235	32.2797	32.5427	32.7085	32.6981	32.7891	32.826	32.6366	32.4201	32.5388	32.4855	32.8044	32.6106	32.5372	32.6363	32.6858	32.5358	32.3703	32.5869	33.0248	33.0513	32.9054	32.8657
ATX10_HUMAN	Ataxin-10	29.3725	29.1335	29.2824	29.3257	28.9948	28.9665	29.2708	29.3427	28.9021	28.9729	28.9933	28.9564	28.8459	29.2299	29.3279	28.4011	29.1677	28.9586	29.2275	29.0422	29.2348	29.1495	29.1988	29.2018	28.7841	29.0075	29.1149	29.2298	28.9208	29.0074	29.3232	29.1355	29.1121	29.0071	29.1248	29.1588	28.9185	28.9851	29.2299	29.0734	29.1494	29.2491	29.0336	29.1672	29.1783	29.4053	29.569	29.3195
ATX2L_HUMAN	Ataxin-2-like protein	28.6279	28.7903	28.8302	29.0221	28.7224	28.516	28.528	29.0108	28.3682	28.4948	28.8191	28.8996	28.664	28.6843	29.0816	28.3844	28.9475	29.1517	28.8432	29.2911	28.5975	29.0774	28.6372	28.9599	28.6121	28.6764	28.6683	28.8993	28.7991	28.6495	28.7562	28.397	28.5913	28.8375	28.7076	28.7797	28.7218	28.8333	28.6867	28.6898	28.9549	29.2068	29.2188	28.9947	29.176	28.9959	29.0682	28.8282
AUP1_HUMAN	Ancient ubiquitous protein 1	26.7723	27.0523	26.9595	NA	NA	27.8892	27.0252	27.1286	27.0007	NA	26.2888	26.9086	27.6271	26.7024	26.4547	NA	NA	27.5169	26.8223	NA	26.9874	NA	26.7627	27.4119	NA	27.1854	27.1684	27.4706	27.439	26.8729	27.7279	27.1988	27.4279	26.6326	27.137	27.2637	27.0888	27.2353	NA	27.2976	27.1912	26.894	27.0346	27.3542	26.8282	27.7619	27.0285	26.7643
B2L13_HUMAN	Bcl-2-like protein 13	28.1615	28.2796	28.4948	27.862	28.3076	28.2133	28.8522	28.6451	28.5927	28.2466	28.1818	28.2351	28.1435	27.8085	27.9856	NA	27.8898	28.1274	28.0409	28.6232	28.1939	28.2553	28.5951	28.4179	28.2638	28.2653	28.3042	27.9986	28.2151	28.0837	27.467	28.3204	28.547	28.0714	28.0604	28.3688	27.9719	28.1963	27.9724	28.0339	28.6437	28.5864	27.9347	27.7672	27.8906	28.5372	28.1832	28.2296
B2MG_HUMAN	Beta-2-microglobulin	29.5624	29.4601	29.5946	29.2686	29.5995	29.3926	30.1607	29.2798	29.4724	29.9927	29.893	29.2423	29.1307	29.5451	29.7558	29.7984	29.657	29.803	29.2837	29.2638	29.37	29.4187	29.2205	29.2281	29.445	29.2961	29.2888	29.8241	29.5092	29.3087	29.8453	29.1823	29.533	29.1506	29.5276	29.0088	29.649	29.3522	29.47	29.4816	29.8839	29.9974	30.0609	29.6071	29.9193	29.8116	30.1052	29.6517
BACH_HUMAN	Cytosolic acyl coenzyme A thioester hydrolase	27.773	27.9411	28.2807	28.0185	28.3016	27.9913	28.359	NA	27.7555	27.6357	28.3487	27.8547	27.9543	28.0995	27.7036	27.7015	27.3621	27.7724	28.2689	27.8574	NA	27.4779	NA	28.4958	27.9772	28.0724	28.1625	28.2658	28.01	27.9216	27.8177	27.6058	27.9115	27.7985	27.79	28.2572	27.6927	27.8342	28.2054	28.0515	27.8736	28.3849	27.761	28.5425	27.7648	27.8681	27.9804	NA
BAF_HUMAN	Barrier-to-autointegration factor	29.7704	29.7009	29.8098	29.7833	29.6204	29.6828	29.9276	29.839	29.5781	30.1449	30.0283	29.8653	29.9635	29.7002	29.6422	30.0135	29.6481	29.7528	29.8155	29.8908	29.8865	30.126	29.9074	30.0376	30.1694	30.0316	30.0346	29.8404	30.0074	29.9801	29.8713	30.0054	30.1012	30.0855	30.1849	30.1612	29.8998	29.9328	30.2442	30.089	29.8198	29.9567	29.6908	29.8174	29.8252	29.7132	29.9943	29.9765
BAG2_HUMAN	BAG family molecular chaperone regulator 2	29.8098	30.1878	30.0835	29.9333	29.9438	30.2515	30.1011	29.8433	30.0469	30.1262	30.2166	30.0009	30.0432	30.2467	30.0229	30.3516	30.312	30.0641	30.0381	30.0303	29.8713	29.9749	30.1306	30.3167	30.1937	30.1772	30.0922	30.2681	30.2398	30.3069	30.4909	30.2984	30.0185	30.2942	30.1716	30.0262	30.3686	30.2691	30.1804	30.0278	30.1425	30.102	30.4486	30.3056	30.5532	30.5121	30.3592	30.6942
BAG3_HUMAN	BAG family molecular chaperone regulator 3	26.7843	NA	27.3644	NA	NA	NA	NA	NA	NA	NA	27.6362	26.2419	NA	NA	NA	NA	NA	NA	NA	NA	27.9733	27.5489	27.9202	27.6118	28.4375	27.4375	28.2504	28.3899	29.1465	28.6356	28.8911	28.8034	27.2785	27.8332	28.2796	25.7732	25.6434	27.7509	28.0061	27.6718	NA	28.2871	24.8669	27.3827	29.7434	29.727	30.4186	28.7747
BAG6_HUMAN	Large proline-rich protein BAG6	28.6287	28.5805	27.1081	28.6861	28.9232	28.6456	27.6462	28.2791	27.8787	28.5642	27.963	28.9011	28.7958	27.933	28.8841	NA	28.8895	29.0842	28.9446	28.8722	28.7335	28.8176	29.0537	29.0099	28.809	28.9767	28.6813	28.6568	28.9801	28.7573	27.9761	28.4968	29.1133	28.5065	28.8062	28.8996	28.5977	28.3272	28.6393	28.5877	28.2107	28.7187	29.0565	29.4828	27.6572	27.6617	27.489	28.0774
BAP31_HUMAN	B-cell receptor-associated protein 31	31.5054	31.5602	31.7437	31.4854	31.7148	31.9575	31.6704	31.7223	31.7304	31.8591	31.789	31.7276	31.8081	32.1077	31.6662	32.2077	32.0068	31.9578	31.5615	31.7386	31.4758	31.4014	31.2038	31.59	31.5788	31.6914	31.1985	31.9034	31.7814	31.6557	31.827	31.827	31.5372	31.2586	31.7162	31.5139	31.7436	31.7687	31.644	31.5977	32.2146	31.7135	31.9251	31.3744	32.2266	31.8356	32.1555	32.0698
BASI_HUMAN	Basigin	31.6756	31.7448	31.8725	31.5797	31.59	31.9643	31.8526	31.7959	31.8905	31.853	32.0161	31.7041	31.7082	31.9738	31.8256	32.1212	32.049	31.9258	31.5893	31.7976	31.6896	31.7683	31.79	31.7811	31.9789	31.8164	31.7094	31.9088	31.8703	31.8082	32.1419	31.8851	31.7657	31.8084	31.6543	31.694	32.0079	31.6032	31.6234	31.7164	32.3633	32.2504	32.2176	32.2203	32.3436	32.1349	32.1552	32.0345
BASP1_HUMAN	Brain acid soluble protein 1	30.502	30.4374	30.5117	30.5326	30.2437	30.4528	30.6177	30.6433	30.3188	30.4422	30.355	30.5706	30.4704	30.6793	30.6803	30.938	30.7091	30.8906	30.4511	30.6421	30.061	30.0877	30.0436	30.1394	30.2514	30.2452	30.161	30.4993	30.4632	30.3305	30.5383	30.0778	29.9796	29.8922	30.3578	30.334	30.7166	30.4098	30.1683	30.1315	30.8308	30.5981	30.7214	30.3949	30.7055	30.1649	30.807	30.8545
BAX_HUMAN	Apoptosis regulator BAX	28.1239	28.3836	28.2836	28.1675	28.4938	28.2497	28.5122	28.4158	28.1515	NA	28.283	28.2568	28.3371	28.6819	28.344	27.8979	28.4186	28.0958	28.2451	28.3772	NA	28.5048	28.4991	NA	28.3321	28.0682	28.3601	28.3689	NA	28.1009	NA	27.8971	28.2232	28.2368	28.1288	28.2297	28.191	NA	28.3283	27.8678	28.2432	28.1466	NA	NA	28.6612	NA	NA	28.1769
BCAT1_HUMAN	Branched-chain-amino-acid aminotransferase, cytosolic	29.8137	29.6051	29.598	29.6177	29.5215	29.7363	29.4147	29.3852	29.4559	29.7693	29.4433	29.6311	29.8117	29.738	29.8	29.1172	29.3985	29.6566	29.8202	29.7601	29.627	29.7369	29.5299	29.3141	29.0773	30.0706	29.3778	29.6985	29.3407	29.5293	29.3684	29.6878	29.4273	29.5742	29.5642	29.6534	29.3746	29.3012	29.981	29.6522	29.7371	29.7235	29.3555	29.6163	29.5349	28.9707	29.4927	30.1861
BCAT2_HUMAN	Branched-chain-amino-acid aminotransferase, mitochondrial	27.7501	27.2553	27.5598	27.5126	27.8387	28.0974	27.7569	28.0145	27.8763	27.6434	27.417	27.8104	28.1154	26.6572	27.5896	NA	27.7593	27.6292	27.9477	27.7104	28.0273	27.727	27.3573	27.5364	26.8661	27.7515	27.8323	27.4314	28.0619	27.8053	27.6368	27.6295	28.0164	27.9427	27.8241	27.3966	28.1168	27.9144	27.9074	28.0416	27.3448	27.2621	27.3499	27.6712	27.6722	28.0573	27.3732	27.5256
BCCIP_HUMAN	BRCA2 and CDKN1A-interacting protein	28.0867	28.3686	28.3263	28.2421	27.943	27.9441	28.0846	27.9077	27.8883	28.1437	28.0909	28.1302	28.0953	28.3179	27.9869	28.2694	28.0486	28.1144	28.2247	27.9599	27.9336	27.9328	28.3709	27.4587	28.0513	28.0811	27.9551	28.2277	28.2089	28.0651	27.9043	28.1425	27.9421	28.1125	27.7239	28.0733	28.1278	28.0553	28.0738	28.0292	28.2235	28.4651	27.9624	28.4029	28.4789	28.357	28.236	28.2082
BCKD_HUMAN	[3-methyl-2-oxobutanoate dehydrogenase [lipoamide]] kinase, mitochondrial	27.7812	27.4775	27.5333	27.6754	27.9118	27.9164	26.8428	27.7865	27.8763	27.8684	27.3343	28.0475	27.8458	28.0487	27.9685	27.108	27.831	27.9059	27.8547	28.0454	28.055	27.7628	27.819	27.8966	27.7837	28.2066	27.9444	27.7912	27.8713	27.8599	28.3749	28.1651	28.4207	27.9404	27.8364	27.959	28.09	27.8664	27.9006	28.1544	27.7395	27.3573	27.4463	27.6564	28.0864	28.0142	28.0774	27.7992
BCLF1_HUMAN	Bcl-2-associated transcription factor 1	30.6574	30.7645	30.8517	30.8108	30.9106	31.0561	30.8613	30.7429	31.1125	30.9263	30.6763	30.9544	30.8821	30.5822	30.856	31.33	31.1051	31.0282	30.7044	30.896	31.0571	31.028	31.0283	30.5329	31.1802	31.1861	31.0292	30.8226	31.2099	31.2484	31.3647	31.0139	30.8062	31.0405	31.1649	31.3314	31.4846	31.2135	31.0249	31.1408	31.1214	31.0507	31.0659	31.2666	31.5347	31.1263	31.2996	31.0283
BGAL_HUMAN	Beta-galactosidase	28.6964	29.0129	28.8755	28.6838	28.9477	28.7448	29.0643	29.0526	29.1641	29.0065	28.9945	28.9057	29.2298	28.9786	29.0828	28.6591	28.9678	28.8836	28.8072	28.724	28.9864	28.7188	29.1558	28.9802	29.201	29.0286	28.9072	29.0337	28.9857	28.9216	28.9313	28.8075	29.3159	28.9655	29.2162	29.2962	29.1221	29.0504	28.9268	28.8926	28.7619	28.6791	28.8127	28.805	28.7796	28.9289	28.6487	29.021
BGH3_HUMAN	Transforming growth factor-beta-induced protein ig-h3	28.5197	28.5741	28.689	28.3539	28.4185	28.8024	29.1026	29.281	29.1948	28.4206	29.2651	28.2166	28.8612	29.4736	28.8318	28.6332	28.5865	28.7617	28.8127	29.0955	29.0341	28.607	28.7292	29.1621	28.8414	28.9144	28.9027	28.5897	28.6966	28.9043	28.5717	28.9317	29.0245	28.9143	28.9982	28.9451	29.158	29.0506	28.6063	29.0033	28.5138	28.087	28.3915	28.7428	29.3213	28.9716	28.502	28.699
BID_HUMAN	BH3-interacting domain death agonist	29.3364	29.3041	29.2519	29.4395	28.985	28.8692	29.139	29.2894	28.8189	28.765	28.8434	28.985	29.4576	29.1135	29.7168	29.04	29.188	29.1589	29.1652	29.417	29.2252	29.4822	29.134	29.1397	29.2609	29.2795	29.5378	29.7492	29.0399	29.2135	29.3849	29.2899	29.0411	29.7714	29.15	29.2802	29.1775	29.2408	29.4452	29.5449	28.8044	29.1085	29.1148	29.1338	28.891	29.4784	28.9261	29.2238
BIEA_HUMAN	Biliverdin reductase A	28.5743	28.5513	28.3119	28.6417	28.5806	28.4426	28.2707	28.656	27.8569	28.3543	28.8185	28.4676	28.5748	28.5535	28.9989	28.7431	28.3044	28.5227	28.6032	28.7302	28.8373	28.8511	28.8761	28.2221	28.8017	28.7274	28.6454	28.3656	28.3776	28.5741	28.3272	28.4087	28.6687	28.7732	28.8687	29.1483	28.0957	28.6913	28.7369	28.6782	28.1949	28.7803	28.4436	28.5619	28.6615	28.3987	28.6809	28.2779
BIN2_HUMAN	Bridging integrator 2	27.4807	28.0848	28.0944	28.3339	28.156	27.8788	28.0167	28.0659	27.864	27.7159	28.0414	27.9784	28.3806	28.272	28.5424	NA	28.2936	28.3271	27.9534	27.7866	28.0733	28.0443	27.8236	27.5899	28.2057	28.1841	28.1662	28.0547	27.6243	28.1916	27.8609	27.674	28.0927	28.4574	28.0557	28.2326	28.1254	27.8055	28.1478	27.7973	27.6072	28.067	27.9104	27.8401	27.539	27.5613	27.8569	28.122
BLMH_HUMAN	Bleomycin hydrolase	28.9372	28.7725	28.7219	28.8569	28.9552	28.7236	28.9205	29.2129	28.7834	28.6507	28.9497	28.6796	29.0346	28.9615	28.7598	28.5319	28.4258	28.9533	28.8169	28.9289	28.651	28.8404	28.8745	28.5386	28.3997	28.5871	28.9551	28.6059	28.7173	28.5775	28.6649	28.5451	28.7856	28.9034	28.7555	28.798	28.6352	28.5757	28.5602	28.6663	28.7496	28.6437	28.6826	28.7199	28.308	28.5945	28.3651	28.6104
BLVRB_HUMAN	Flavin reductase (NADPH)	27.1772	NA	27.516	27.5796	27.5853	NA	27.4943	NA	NA	27.1184	28.0168	NA	NA	27.3833	27.4568	27.4174	NA	NA	27.5255	NA	27.6103	27.74	27.687	27.6704	27.5637	27.2851	27.7984	27.5452	27.4614	27.6769	27.7181	27.7478	27.3037	27.7085	27.6686	27.5127	27.6108	27.489	27.7657	27.569	27.4907	27.598	27.3268	27.6771	27.7442	27.6617	27.6176	27.4657
BMP2K_HUMAN	BMP-2-inducible protein kinase	27.7593	27.7368	27.6156	27.5778	27.4391	27.6399	27.6703	27.3504	27.5754	27.9191	27.5275	27.71	27.7486	27.7006	27.5247	27.7781	27.8123	27.9762	27.3571	27.7696	27.4691	27.7926	26.6684	27.5985	27.3255	27.71	27.7049	27.3434	27.3051	27.3989	28.0223	27.7758	27.5573	27.705	27.0112	26.7498	27.0449	27.3283	27.6348	27.8447	27.7884	27.6814	27.9107	27.7496	28.019	27.6513	27.5892	28.0551
BMS1_HUMAN	Ribosome biogenesis protein BMS1 homolog	27.2374	27.0119	27.1301	26.9127	27.2244	27.2036	27.3324	27.5388	27.4102	27.1411	27.3324	26.9382	27.1892	27.2657	27.1408	NA	27.0038	NA	27.3825	27.1336	26.8276	27.3595	27.1274	26.9475	27.257	27.2656	27.2202	27.3223	26.9769	26.7891	26.9584	27.1337	27.3678	27.181	26.856	26.9855	27.3987	27.2305	27.1026	27.3701	27.4372	27.063	26.9693	27.1907	27.3057	27.48	27.1466	27.3693
BNIP2_HUMAN	BCL2/adenovirus E1B 19 kDa protein-interacting protein 2	25.9711	26.2117	25.633	26.0776	25.9512	NA	NA	NA	25.67	26.0381	26.2028	26.1479	25.6939	NA	NA	NA	NA	NA	26.2087	NA	26.684	26.5583	26.7332	26.5134	26.4219	26.8643	26.2955	26.4712	26.3006	26.3761	26.1491	26.3799	26.4857	26.5914	26.332	26.8018	26.4601	26.4341	26.2127	26.7073	25.204	25.9765	25.9715	26.0055	NA	25.9209	25.2074	24.9706
BOLA2_HUMAN	BolA-like protein 2	28.7787	28.6151	28.6002	28.7854	NA	NA	28.6766	28.4663	28.363	28.4628	28.7484	28.3469	28.1606	NA	28.5522	28.6246	28.2606	28.3897	28.6162	28.5825	28.7477	28.8054	28.7728	29.5244	28.9071	28.8709	29.1044	29.0159	28.6425	28.5989	28.834	28.9093	28.8022	28.8294	28.9558	28.3801	28.7699	28.5331	28.5643	28.7879	29.1112	28.8999	29.2858	28.889	29.358	29.0429	29.0856	29.0064
BOP1_HUMAN	Ribosome biogenesis protein BOP1	30.1809	30.262	30.2156	30.2151	30.4071	30.4737	29.7707	30.0947	30.269	30.332	29.6881	30.1982	30.1961	29.9427	30.0124	29.8864	30.4276	30.142	30.1298	29.9966	30.2285	30.1667	30.4029	30.1796	30.177	30.1357	30.2482	29.8612	30.4699	30.2879	30.4839	30.0748	30.3968	30.4043	30.1985	30.1471	30.393	30.3151	30.2553	30.1968	30.1817	30.0074	30.2725	30.2846	30.4005	30.4602	29.9178	30.0841
BPNT1_HUMAN	3(2),5-bisphosphate nucleotidase 1	29.4477	29.3855	29.7535	29.5033	29.2385	28.5997	29.1191	28.7962	29.2967	29.2752	29.5633	29.3833	29.1304	29.5314	29.0716	28.6778	28.9253	28.82	29.5302	28.884	29.3574	29.7331	29.4305	29.4223	29.3001	29.2905	29.4214	29.6663	29.1192	29.1721	29.1666	29.2138	29.3562	29.4138	29.2047	29.4083	29.1783	29.0214	29.2405	29.2555	29.3719	29.4251	29.5388	29.3553	29.1785	29.2461	29.557	29.186
BRAT1_HUMAN	BRCA1-associated ATM activator 1	26.3666	26.306	26.5666	26.5447	26.2629	26.4474	26.6246	26.5754	26.2284	26.2239	26.3952	26.1594	26.3274	26.2715	26.6242	26.1088	26.3388	26.0347	26.3293	26.5001	26.4666	26.8252	26.339	26.7786	26.1507	26.2783	26.3821	25.9579	26.0026	26.4394	26.1508	26.0357	26.9251	26.5023	25.4172	26.3096	26.2951	26.4904	26.5442	26.3345	26.157	26.1619	26.3321	26.4989	25.8797	26.4206	25.8465	26.0155
BRD4_HUMAN	Bromodomain-containing protein 4	27.3113	27.3949	27.0003	27.3887	27.0156	27.0888	27.6327	NA	27.5454	27.0513	26.9436	27.7432	26.8387	NA	27.6929	NA	27.5341	NA	26.8179	27.4655	27.2311	27.2104	27.0253	27.545	27.5192	27.0513	26.9131	28.0064	27.5746	27.6123	27.8189	27.294	25.9082	27.5365	27.4137	26.3942	27.3072	27.253	27.6654	27.4568	26.8748	27.0278	27.2339	NA	27.148	26.9634	26.9992	NA
BRE1A_HUMAN	E3 ubiquitin-protein ligase BRE1A	27.9647	28.0653	28.0162	27.7793	27.151	27.7176	28.0125	NA	27.8115	27.8267	28.181	27.9807	NA	27.7585	27.4823	28.0354	27.8727	27.7601	27.7948	27.5039	27.8529	27.6435	27.9319	28.0556	28.0455	27.7621	27.8445	27.7114	27.6818	27.963	28.0857	27.7455	27.5787	27.6976	27.5452	27.9449	27.7439	27.922	27.6828	27.8273	28.1752	27.7437	27.8817	28.1208	27.5098	27.5896	27.6262	NA
BRE1B_HUMAN	E3 ubiquitin-protein ligase BRE1B	27.6705	28.0264	28.1174	28.194	27.9239	27.7318	27.6807	26.8776	28.2417	27.9278	28.0714	27.8504	27.9687	27.5259	27.4196	NA	27.5519	27.5308	27.6353	27.7584	27.9917	27.9393	28.1662	28.1225	28.2096	27.9524	27.9588	28.0015	28.0374	28.1004	28.0048	28.0144	27.8148	27.8965	27.9276	28.3688	28.0872	27.9028	27.7831	28.3656	27.6673	28.0214	28.4186	27.821	27.7684	27.6954	27.7076	27.3958
BROX_HUMAN	BRO1 domain-containing protein BROX	28.3535	27.7406	27.6168	28.1136	28.1124	27.9255	27.9833	28.4858	28.1382	28.1268	27.6847	28.1672	28.1395	28.3368	28.2585	27.2306	27.8332	27.9211	28.2406	27.9642	27.9467	28.151	28.1143	27.9432	28.0309	28.16	28.1362	27.6214	27.9273	28.0692	28.6058	27.9555	28.2775	28.4162	28.0399	28.4886	27.2125	28.084	28.0174	28.4341	27.6567	28.4305	28.0043	28.0312	28.3001	28.4361	27.3912	27.9588
BRX1_HUMAN	Ribosome biogenesis protein BRX1 homolog	29.8508	29.7569	29.8521	29.6684	29.8777	30.1065	29.9076	29.657	30.0778	29.9642	29.746	29.8734	29.6842	29.7312	29.5463	29.7193	29.6734	29.8874	29.7994	29.7664	30.067	29.8798	29.9897	30.0188	30.1589	30.0816	29.9474	29.7431	30.1449	30.0871	30.1272	30.1524	30.1511	30.0504	29.7723	29.9513	29.99	29.9738	29.7709	29.8741	29.6574	29.5308	29.7205	29.9936	29.8472	29.8286	29.8388	29.8606
BST1_HUMAN	ADP-ribosyl cyclase/cyclic ADP-ribose hydrolase 2	28.3113	28.4447	28.5273	28.5433	28.5342	28.7163	29.0142	28.4146	28.6746	28.6239	28.4751	28.7889	28.1648	28.7505	NA	27.7029	28.2664	28.7932	28.9966	28.3878	28.2383	28.363	28.3079	28.2564	28.4956	28.3398	28.3825	28.3184	28.3401	28.3615	28.4078	28.4319	28.4067	28.4037	28.3855	28.1853	28.4027	28.2771	28.4936	28.3366	28.6854	28.381	28.369	28.5564	28.4621	28.6159	28.5375	28.7074
BT3L4_HUMAN	Transcription factor BTF3 homolog 4	28.5831	28.6674	28.6151	28.6978	28.1261	28.3902	28.8309	NA	27.2807	28.4727	28.7295	NA	28.0995	NA	NA	NA	NA	28.6529	29.0886	NA	27.9601	28.2744	28.4294	28.6871	27.9417	28.5491	28.7699	NA	28.2525	28.2682	28.8343	28.3602	28.3639	28.7051	28.4154	28.7637	NA	28.3349	28.8391	28.2207	28.729	28.6235	28.5853	28.4176	28.5393	29.1001	28.436	28.2933
BTF3_HUMAN	Transcription factor BTF3	30.2344	30.0177	30.0189	30.365	30.0188	30.0026	30.3655	30.3172	30.3168	30.0798	30.0677	30.0986	30.6751	30.5353	30.1862	29.8879	30.0115	29.976	30.2031	30.2958	30.3534	30.4647	30.3006	30.4333	30.456	30.2749	30.4895	30.2815	30.1339	29.8855	30.0962	30.2555	30.2076	30.2539	30.6124	30.2657	30.0845	30.2258	30.2472	30.227	30.2649	30.2762	30.0523	30.2118	30.1456	30.071	30.1224	30.4589
BTK_HUMAN	Tyrosine-protein kinase BTK	28.391	28.5265	28.1105	28.5361	28.0606	28.1386	28.4982	28.5298	28.5635	28.3391	27.7976	27.8016	28.4606	28.3609	28.3583	28.1586	28.1659	28.2595	28.2925	27.9444	28.8625	28.638	28.3009	28.7154	29.422	28.4961	28.6713	28.6365	28.3556	28.1467	28.6204	28.4814	28.5772	28.911	28.484	29.047	28.016	28.568	28.6519	28.793	28.493	28.8364	28.583	28.5208	28.1747	28.7154	28.3371	28.598
BUB3_HUMAN	Mitotic checkpoint protein BUB3	30.5847	30.628	30.6374	30.4632	30.3448	30.4063	30.4426	30.3142	30.5483	30.6041	30.5951	30.4024	30.2572	30.4491	30.1815	30.5276	30.5032	30.5508	30.3444	30.4443	30.5467	30.5483	30.6795	30.6162	30.5867	30.5488	30.4215	30.6543	30.5697	30.5713	30.6545	30.51	30.4438	30.685	30.5322	30.5357	30.6079	30.5285	30.5924	30.6139	30.6398	30.7394	30.7181	30.7215	30.7045	30.6841	30.6708	30.4919
BUD31_HUMAN	Protein BUD31 homolog	27.7885	27.9525	27.9605	28.0029	28.2841	28.0562	28.2448	28.289	28.3616	27.8835	28.0677	28.2861	27.962	27.7923	28.2042	27.9827	28.2076	27.9095	27.9558	28.1518	28.1259	28.0927	27.908	28.3835	28.035	28.2736	28.0006	28.1644	28.2635	27.9413	27.8394	28.1171	27.8385	28.023	27.839	28.1163	28.4499	28.2315	28.2541	28.0469	27.9259	27.6958	27.8431	27.8458	27.8583	27.3306	27.6949	27.6781
BYST_HUMAN	Bystin	27.2573	27.6349	27.5444	27.5402	27.3885	27.4443	NA	27.4313	27.1909	27.3248	27.6792	27.5173	27.4533	27.1226	27.1187	NA	NA	27.3573	26.8919	27.4356	27.5165	27.5196	27.4233	27.3542	27.5696	27.7987	27.4163	27.4906	27.4444	27.7565	27.5255	27.4626	27.6012	27.3322	27.3611	27.7537	27.5298	27.6225	27.1437	27.4987	27.2783	27.4612	27.4536	28.4494	25.6193	26.7049	26.1763	NA
BZW1_HUMAN	Basic leucine zipper and W2 domain-containing protein 1	29.4997	29.7399	29.7708	29.9086	29.6042	29.3856	29.7894	29.829	29.5221	29.4712	29.4835	29.5324	29.5327	29.6717	29.8858	29.2989	29.3166	29.2358	29.3892	29.8101	29.6084	29.4667	29.4726	29.7225	29.4124	29.5351	29.6187	29.7827	29.5165	29.4307	29.5548	29.8234	29.5515	30.0441	29.6013	29.7136	29.3894	29.4513	29.7745	29.6169	29.6885	29.5227	29.8732	29.4819	29.5843	29.5621	29.4216	30.0561
BZW2_HUMAN	Basic leucine zipper and W2 domain-containing protein 2	28.4661	28.3141	28.5001	28.4996	28.2456	28.2684	28.4651	28.7397	27.9654	28.1865	28.3716	28.166	28.2968	28.532	28.5314	28.0404	27.9473	28.0945	28.2907	28.6971	28.5045	28.6141	28.507	28.6139	28.4291	28.1938	28.3429	28.446	28.3298	28.2357	28.3585	28.5018	28.2589	28.5379	28.4628	28.3438	28.0027	28.4066	28.4773	28.2649	27.9555	28.2441	28.2235	28.4868	28.5332	28.3906	28.2106	28.4682
C1QBP_HUMAN	Complement component 1 Q subcomponent-binding protein, mitochondrial	29.6823	29.5173	30.0254	29.9713	29.7595	29.9297	30.138	30.0372	30.0977	30.1907	30.1456	30.05	29.901	30.119	29.5537	29.4106	29.6217	30.1111	30.0696	29.9303	29.8683	29.6252	29.5565	29.4974	29.7732	29.824	29.8844	29.9104	29.8813	29.7191	29.7403	29.8615	30.2178	29.8073	29.8181	29.8345	30.1542	29.8747	29.7057	29.9629	29.916	29.451	29.698	29.3051	30.2368	30.3814	30.2535	30.565
C1TC_HUMAN	C-1-tetrahydrofolate synthase, cytoplasmic	31.2887	31.2657	31.3775	31.4131	31.2669	31.1258	31.357	31.3594	31.0633	31.1895	31.3406	31.1663	31.298	31.2401	31.5729	31.1859	31.0599	31.2956	31.3103	31.3329	31.3405	31.5633	31.5748	31.5765	31.3387	31.4439	31.5199	31.4467	31.2248	31.3135	31.4478	31.4482	31.4976	31.5741	31.3972	31.4856	31.2499	31.4284	31.6489	31.3712	31.4723	31.5215	31.3962	31.4859	31.2713	31.3553	31.3514	31.3799
C1TM_HUMAN	Monofunctional C1-tetrahydrofolate synthase, mitochondrial	29.3273	29.2592	29.4476	28.8545	29.2535	29.6061	28.9993	29.1475	29.3053	29.3425	29.47	29.2454	29.3235	29.2464	28.9919	28.6878	29.0162	29.0446	29.2349	29.1114	29.0178	29.027	28.7641	29.1416	28.9978	29.4665	29.2058	29.0305	29.3822	29.0154	29.0388	29.3184	29.5177	29.0848	29.0401	29.1886	29.183	29.2406	28.975	29.298	29.1564	28.8949	28.7667	28.6714	29.5234	29.4591	29.3743	29.1648
C2D1B_HUMAN	Coiled-coil and C2 domain-containing protein 1B	NA	27.4233	27.6925	NA	26.8548	NA	NA	NA	NA	NA	27.5611	NA	NA	26.981	NA	NA	NA	NA	26.8947	NA	NA	27.4146	27.1553	NA	NA	27.5512	27.7411	NA	27.3708	27.3796	NA	NA	27.1667	27.3487	27.3866	27.4156	NA	26.9803	27.6012	27.5209	26.6189	27.433	27.1581	NA	26.3711	NA	27.3719	NA
C43BP_HUMAN	Collagen type IV alpha-3-binding protein	26.1204	25.5111	25.7999	26.0792	NA	25.7729	NA	26.0753	NA	NA	25.6508	25.6993	25.8929	25.1414	NA	NA	25.7223	25.8951	25.4498	NA	26.4097	26.1245	NA	NA	25.9624	25.9215	NA	26.002	NA	NA	25.3474	25.6252	NA	26.0767	NA	NA	26.1898	NA	26.3161	NA	NA	NA	25.7815	25.2956	NA	26.0417	25.7339	NA
CA050_HUMAN	Uncharacterized protein C1orf50	26.915	NA	NA	27.0764	NA	NA	27.5071	27.26	27.035	NA	NA	NA	NA	27.0994	27.0226	NA	NA	NA	NA	27.025	26.9983	27.1934	27.2829	27.3777	27.0073	27.2038	27.2914	27.4912	26.9756	NA	27.1089	26.9787	26.8899	26.5707	26.8733	NA	26.9295	26.9928	27.2538	27.3895	NA	26.5238	NA	26.8287	NA	NA	NA	NA
CA123_HUMAN	UPF0587 protein C1orf123	NA	28.4907	28.4837	28.2474	28.2507	NA	28.1095	27.9754	27.8017	27.9899	28.2199	28.4864	27.5336	NA	28.1788	NA	27.835	NA	28.3108	NA	27.9001	28.1111	28.2881	28.0494	27.8932	28.0475	28.1675	28.2635	27.8523	27.8825	28.3417	28.1439	27.789	28.3238	28.147	28.1093	28.0943	27.7297	28.4924	28.2042	28.1051	28.1453	28.3106	28.1494	28.2265	28.3103	28.1756	NA
CAB39_HUMAN	Calcium-binding protein 39	29.9424	30.0307	29.95	30.1427	29.965	29.8636	30.2033	30.0097	29.7255	29.6451	29.9691	30.0162	30.1669	29.7884	30.0295	29.567	29.6288	29.8654	30.1716	30.0295	30.209	30.1959	30.3119	30.313	30.1037	30.0624	30.1022	29.9772	29.7917	30.019	29.8898	29.9429	30.0356	30.1888	30.1764	30.2273	29.8213	29.8576	30.0346	30.0492	29.9207	30.0739	29.8191	29.8976	29.5472	29.5558	29.7082	29.8978
CAB45_HUMAN	45 kDa calcium-binding protein	28.0973	28.3434	28.6534	28.0503	28.3789	28.2696	27.9082	27.913	27.9879	28.2304	27.9841	28.2851	28.1858	27.8517	NA	28.2235	28.7151	NA	28.0955	28.1914	27.6851	27.8556	28.271	27.9738	27.9184	27.8403	27.8863	27.3935	28.0081	27.9572	28.1466	27.9014	27.9275	27.712	27.9483	27.8167	28.2757	27.9043	28.0141	27.9268	28.5264	28.165	28.6291	28.2651	28.3743	28.1824	28.0228	28.1384
CAH2_HUMAN	Carbonic anhydrase 2	33.7377	33.6843	33.8299	33.7564	33.7435	33.6194	33.7445	33.6387	33.2935	33.4544	33.7747	33.4912	33.552	33.7066	33.6299	33.6628	33.58	33.5556	33.8504	33.5602	33.8968	33.8931	33.8203	33.9329	33.6533	33.8026	33.8032	33.8482	33.6411	33.6864	33.6633	33.5538	33.7277	33.8781	33.9124	33.9045	33.5898	33.8074	33.7347	33.7765	33.8805	33.8861	33.7767	33.8821	33.5909	33.6501	33.8119	33.8344
CAHM2_HUMAN	Calcium homeostasis modulator protein 2	24.9649	25.498	25.1817	25.1471	25.6064	25.9692	25.2121	25.6547	25.7389	25.2362	25.9858	25.4491	25.5937	25.8033	25.4377	25.637	25.5969	25.4527	25.3865	NA	25.0766	25.4613	24.9457	25.7227	25.9182	24.9979	25.5398	25.4605	25.4235	25.4868	25.0431	25.527	26.2508	25.8044	25.5095	25.1082	25.2913	25.2695	25.4103	25.6834	25.4526	25.1521	24.6786	NA	25.2981	25.3576	25.0045	25.3988
CALM_HUMAN	Calmodulin	33.2888	33.2815	33.4355	33.375	32.9846	32.9543	33.2359	33.2135	32.985	33.2927	33.4844	33.2341	33.149	33.4022	33.2821	33.2227	33.3114	33.2815	33.3982	33.2253	33.2153	33.217	33.1329	33.378	33.1665	33.1482	33.2044	33.5656	33.1313	33.2245	33.5496	33.3231	33.0648	33.3564	33.4008	33.3811	33.2825	33.2336	33.492	33.2378	33.7054	33.5103	33.5593	33.2786	33.7102	33.2164	33.5839	33.5679
CALR_HUMAN	Calreticulin	35.6329	35.6596	35.6664	35.552	35.5738	35.6293	35.6082	35.4982	35.7342	35.6647	35.542	35.6094	35.5979	35.5842	35.5334	35.7092	35.59	35.7059	35.6639	35.597	35.6352	35.544	35.8356	35.6852	35.6233	35.6814	35.6865	35.6675	35.6584	35.67	35.8915	35.7112	35.6907	35.6522	35.6192	35.5983	35.8179	35.6975	35.6212	35.6482	35.8173	35.6093	35.9464	35.6923	35.8354	35.4963	35.6546	35.4338
CALU_HUMAN	Calumenin	31.9012	32.0079	31.9973	31.8761	31.8229	31.975	32.124	31.8892	32.1986	31.9974	32.061	31.998	31.8029	31.8787	32.0348	32.1991	32.1238	31.96	31.8803	31.9775	32.0126	31.8382	31.9978	32.2129	32.0006	32.0943	32.0117	32.0606	32.1723	32.1082	32.4393	32.1354	31.9914	32.1032	32.0088	32.085	32.3741	32.0323	32.1225	32.0462	32.1613	31.9961	32.3265	32.0224	32.2364	31.9958	32.0624	32.091
CALX_HUMAN	Calnexin	33.5234	33.265	33.5012	33.4685	33.6843	33.7452	33.5226	33.4898	33.7288	33.6846	33.867	33.7935	33.497	33.7274	33.1343	33.6516	33.6816	33.5462	33.7046	33.313	33.5767	33.4078	33.5198	33.5043	33.6529	33.8054	33.5338	33.5932	33.745	33.7951	33.8009	33.8781	33.9563	33.4149	33.8185	33.5136	33.4967	33.7082	33.5512	33.7329	33.6497	33.3824	33.6145	33.4832	33.6513	33.7194	33.7735	33.6008
CAN1_HUMAN	Calpain-1 catalytic subunit	29.6011	29.748	29.7504	29.8268	29.7995	29.5584	29.772	29.5594	29.3289	29.6329	29.662	29.7987	29.8876	29.7001	29.8738	29.2777	29.1793	29.5682	29.6213	29.5075	29.9007	29.9359	29.956	29.8638	29.7932	29.7394	29.8121	29.7798	29.55	29.4822	29.6887	29.7391	29.9877	29.9237	29.7859	29.6652	29.4142	29.6013	29.8656	29.7392	29.6748	29.7609	29.7124	29.7759	29.5166	29.4814	29.5333	29.5287
CAN2_HUMAN	Calpain-2 catalytic subunit	30.6478	30.5796	30.6808	30.7409	30.5661	30.3878	30.6413	30.5701	30.2049	30.4418	30.5202	30.5097	30.5981	30.564	30.6012	30.0697	30.5181	30.5991	30.6026	30.5914	30.7964	30.8081	30.5234	30.7775	30.5771	30.4193	30.6684	30.7578	30.5249	30.4838	30.7899	30.8385	30.3955	30.7557	30.6271	30.5857	30.3337	30.4976	30.7746	30.596	30.8308	30.6469	30.7161	30.5906	30.5552	30.6593	30.4012	30.898
CANB1_HUMAN	Calcineurin subunit B type 1	27.7606	27.4831	27.3575	27.6881	27.3058	27.1749	27.3886	27.8754	28.1477	27.7574	27.738	27.53	27.5147	27.6575	28.0142	NA	27.3373	27.4373	27.2906	27.6617	27.9306	28.1724	28.0213	28.1491	28.3029	28.2691	28.276	28.2334	28.2596	28.3697	28.0252	28.4756	28.3819	28.2166	28.8903	28.7099	27.9137	28.4112	28.0728	28.4372	27.3673	28.3388	27.6167	27.8614	28.4658	27.7449	27.5911	27.7574
CAND1_HUMAN	Cullin-associated NEDD8-dissociated protein 1	31.4301	31.2487	31.3368	31.4866	31.4486	31.1465	31.2639	31.5012	31.0877	31.1698	31.4686	31.2244	31.3765	31.3743	31.3401	30.9889	31.1828	31.0958	31.4129	31.1011	31.3445	31.5108	31.282	31.4135	31.4377	31.2575	31.4254	31.481	31.1585	31.2122	30.9677	31.1853	31.3524	31.4926	31.4646	31.3857	30.8903	31.1688	31.3964	31.3245	31.3061	31.3529	31.2239	31.424	31.1734	31.4085	31.1525	31.136
CAP1_HUMAN	Adenylyl cyclase-associated protein 1	37.8076	37.8876	37.8624	37.8204	37.7174	37.8168	37.9877	37.9684	37.6637	37.7631	37.8603	37.6808	37.8142	37.9046	37.8839	37.9142	37.7654	37.8368	37.764	37.8552	37.9748	38.0419	37.9091	38.0111	37.9384	38.0398	37.9889	38.0097	37.8505	37.8398	37.9011	37.7767	37.8298	38.0333	38.0618	38.0171	37.7793	37.868	37.9843	37.8965	38.0265	38.1435	38.0651	38.0402	37.9059	37.8833	38.0171	37.8262
CAPG_HUMAN	Macrophage-capping protein	33.9541	33.7559	33.9071	33.9835	33.6312	33.6748	34.1084	33.9908	33.6327	33.6929	33.7913	33.7484	33.9133	33.9186	33.8129	33.4145	33.6329	33.8128	33.7515	33.8777	33.9063	33.8602	33.7959	33.7175	33.7389	33.7577	33.8593	33.9795	33.5336	33.6759	33.8096	33.6904	33.6925	33.7298	33.9807	34.0228	33.576	33.7026	33.8363	33.7974	33.82	34.0858	33.5342	33.6984	33.6877	33.9478	34.0571	33.7565
CAPR1_HUMAN	Caprin-1	31.0108	31.0041	31.083	31.051	30.915	31.0366	31.0231	31.1615	31.0324	31.1895	30.8497	31.0995	31.2055	31.106	31.1533	30.9271	31.0601	31.1874	31.0135	31.1724	30.9622	30.9602	30.9903	31.0099	31.0393	31.1667	31.0468	31.0198	31.1911	31.0379	31.2934	31.0823	30.95	31.0013	30.9483	30.9847	31.2628	31.0915	31.1837	31.1569	31.187	31.1314	31.3235	30.9659	31.3932	30.928	31.1696	31.1363
CAPZB_HUMAN	F-actin-capping protein subunit beta	32.6565	32.6508	32.6811	32.7125	32.4361	32.5792	32.7598	32.6391	32.4643	32.5291	32.6324	32.544	32.7186	32.5991	32.5761	32.6692	32.5773	32.5902	32.7335	32.6792	32.7005	32.7026	32.7947	32.8165	32.6409	32.7026	32.7766	32.7472	32.5702	32.7514	32.9446	32.7688	32.612	32.8045	32.7337	32.7446	32.6614	32.7452	32.818	32.6356	32.9506	32.8887	32.9844	32.9375	32.9691	32.932	32.766	32.7333
CAR19_HUMAN	Caspase recruitment domain-containing protein 19	NA	27.3615	27.13	27.2548	NA	NA	26.9745	NA	NA	NA	NA	NA	27.2511	27.1214	26.9798	29.3994	NA	NA	26.9538	27.2535	27.6818	27.578	NA	27.4179	27.7001	27.3455	27.7244	27.7203	27.3472	27.714	27.5756	27.8028	27.4663	27.5813	29.6371	27.3294	27.599	27.6104	NA	27.3143	27.3031	27.3325	27.1532	27.2415	NA	27.4689	27.3447	26.8693
CARD9_HUMAN	Caspase recruitment domain-containing protein 9	26.5309	26.7401	26.7192	26.8567	26.3871	26.6784	26.5898	26.8162	26.4208	26.0571	26.9248	26.198	26.7846	26.5407	26.9108	NA	26.6295	26.7234	26.444	26.6744	27.0853	26.7199	26.4933	26.8566	26.7475	NA	26.3803	26.3663	26.7641	26.339	26.7201	26.5099	26.6067	26.6502	25.7731	NA	NA	26.6615	26.5264	26.469	26.4978	26.299	26.6225	26.1126	26.0337	26.6557	26.4251	26.43
CARF_HUMAN	CDKN2A-interacting protein	27.7833	27.8174	28.3321	27.3134	27.8702	28.7417	28.3209	28.1068	28.2822	28.8305	27.9946	28.0665	27.7262	27.9039	28.3135	28.9479	28.6953	28.9064	27.525	28.0405	28.3232	28.2173	27.9518	28.5181	28.6167	28.547	28.3647	28.653	28.5991	28.5257	28.9558	28.5015	28.0701	28.2606	28.3285	28.2929	28.6959	28.5681	28.3656	28.4029	28.9497	28.6632	29.3088	28.6978	28.6559	28.2695	28.7612	NA
CARM1_HUMAN	Histone-arginine methyltransferase CARM1	27.97	28.0168	27.8529	28.1003	NA	27.7419	NA	NA	27.6156	27.4776	NA	27.5995	NA	27.6913	27.8413	NA	28.3353	27.7505	27.0752	27.7574	27.678	28.0252	27.7734	27.8663	27.7381	28.5561	27.8106	28.0077	27.5047	27.7554	28.2532	NA	28.1503	28.3361	27.9351	27.8963	27.6383	27.7572	27.8843	28.0224	NA	27.754	27.6058	27.8272	27.5523	NA	27.3728	27.6833
CASP1_HUMAN	Caspase-1	27.8124	27.596	27.228	27.5812	27.4214	27.5368	27.7717	28.11	27.5829	27.6325	27.7028	27.7294	27.792	27.5235	27.9505	NA	27.7496	27.7856	27.5859	27.7175	27.6905	27.7122	27.6481	27.6514	27.5436	27.9072	27.6522	27.5667	27.8947	27.4491	27.8516	27.7169	27.6259	27.6339	27.82	27.7688	27.292	27.6915	27.8212	27.6016	27.2086	27.7725	27.7058	27.9225	27.3709	27.5257	27.5076	27.526
CATA_HUMAN	Catalase	32.8133	32.8189	32.9422	32.7992	32.8721	32.7148	32.6772	32.6026	32.8373	32.5756	32.8429	32.6552	32.6227	32.7191	32.6315	32.8171	32.7345	32.7447	32.873	32.6653	32.8202	32.7294	32.9075	32.7917	32.8872	32.7896	32.8615	32.8473	32.7718	32.7964	32.9214	32.7289	32.7049	32.8095	32.7707	32.8031	32.8642	32.7438	32.7708	32.7259	32.6977	32.8833	32.9255	32.9387	32.9362	32.6958	32.801	32.8415
CATB_HUMAN	Cathepsin B	33.1018	33.1718	33.098	33.0756	33.1504	33.1135	33.1492	32.9556	33.3065	33.2685	33.124	33.1711	32.8939	32.8399	33.2052	33.3925	33.2644	33.2272	33.2549	33.1966	33.2679	33.1782	33.4106	33.207	33.3159	33.3551	33.2736	33.2957	33.3892	33.4467	33.3578	33.3464	33.3208	33.2842	33.2601	33.378	33.461	33.2883	33.293	33.2129	33.3216	33.2469	33.3959	33.4159	33.3732	33.3164	33.3447	33.2157
CATC_HUMAN	Dipeptidyl peptidase 1	29.4897	29.7425	29.7496	29.3574	29.7558	29.6255	29.5615	29.3775	29.6817	29.5538	29.5184	29.779	29.3023	29.3444	29.2393	29.649	29.4676	29.731	29.6364	29.2027	29.2891	29.2643	29.6617	29.4324	29.6424	29.556	29.2113	29.5065	29.4685	29.4172	29.3516	28.7125	29.5643	29.6356	29.2796	29.6391	29.657	29.6357	29.5145	29.5584	29.6741	29.5417	29.8916	29.7778	29.3044	29.1965	29.4843	29.1547
CATD_HUMAN	Cathepsin D	34.0674	34.1798	34.1918	33.943	34.2026	34.1556	34.2373	33.9515	34.331	34.2115	34.2667	34.0494	33.9649	34.1077	34.0193	34.116	34.2729	34.3706	34.3855	34.1842	33.964	33.8831	34.1573	34.1087	34.2291	34.2279	34.1097	34.1967	34.3227	34.2344	34.326	34.2243	34.0361	34.2271	33.9548	33.9884	34.2452	34.139	34.0911	34.1279	34.1148	33.9947	34.1479	34.2644	34.2538	34.1498	34.1272	34.0641
CATG_HUMAN	Cathepsin G	27.6836	27.7258	27.913	26.8317	28.3919	28.4384	28.7182	26.9435	27.9554	27.7005	27.915	27.8206	28.8574	28.0663	28.1323	27.7947	28.3203	27.9207	27.826	28.114	28.1608	27.0185	27.6722	28.089	28.2535	28.0203	28.2708	28.2308	27.8058	28.284	27.2282	28.0769	28.3656	NA	28.1514	28.0683	28.7553	27.9229	27.8187	27.8326	28.1535	27.017	27.2472	27.4046	27.5342	28.2994	28.1763	28.5679
CATH_HUMAN	Pro-cathepsin H	28.3289	28.103	28.3238	28.153	27.7008	28.4275	28.5771	28.402	28.5692	28.3838	28.6141	28.1361	28.4472	28.3872	28.5474	28.9375	28.3881	28.2322	28.7571	28.7602	28.3741	28.4603	28.5765	28.5729	28.676	28.7398	28.4982	28.6184	28.8243	28.3628	28.4862	28.6566	28.8431	28.6228	28.3674	28.904	28.9593	28.6392	28.867	28.5089	28.6635	28.4275	28.6665	28.5189	28.4458	28.7539	28.3661	28.5636
CATL1_HUMAN	Cathepsin L1	30.5443	30.7536	30.4908	30.462	30.6298	30.5899	30.3655	30.8708	30.751	30.7621	30.5931	30.5895	30.8132	30.9436	30.7785	30.6143	30.8444	30.8909	30.6817	30.9226	30.5807	30.8812	30.8246	30.66	30.7261	30.7175	30.7253	30.8351	30.7194	31.2378	30.7354	30.6531	30.512	30.6651	30.6926	30.6171	30.8566	30.9117	30.8969	30.8367	30.569	30.6545	30.6123	30.7661	30.5693	30.7989	30.6925	30.6895
CATS_HUMAN	Cathepsin S	30.7105	31.0085	30.9059	30.829	30.9648	30.8778	30.8285	30.7073	31.1117	30.8994	30.9598	31.0107	30.7247	30.8196	30.8945	31.1113	31.1399	31.0741	30.912	31.0536	31.0771	30.883	31.1444	31.051	30.9769	31.2005	30.8457	31.0172	31.0712	31.1784	31.0066	30.8309	30.9443	30.976	30.9518	30.8705	31.1459	31.0268	31.015	31.0316	31.0092	31.1829	31.0512	31.2538	31.0056	30.8496	31.1674	30.6912
CATZ_HUMAN	Cathepsin Z	31.3379	31.2831	31.3504	31.2395	31.3328	31.328	31.4593	31.132	31.172	31.3227	31.1875	31.3272	31.1363	31.3029	31.2583	31.577	31.5323	31.5091	31.2291	31.2839	31.1393	31.1345	31.2324	31.2477	31.2818	31.2041	31.1621	31.2193	31.3183	31.2412	31.4079	31.2057	31.1578	31.1876	31.1769	31.1785	31.5552	31.3688	31.2989	31.2662	31.5746	31.4696	31.6251	31.5067	31.6861	31.3985	31.4781	31.209
CAZA1_HUMAN	F-actin-capping protein subunit alpha-1	33.0693	32.9738	33.1864	33.1321	33.0196	32.9534	33.2688	32.9149	33.1196	33.175	33.174	33.0067	32.7589	33.2654	32.8797	32.8837	32.6604	33.0048	33.1957	32.9124	32.9605	32.971	32.9995	33.0497	32.9939	32.9994	33.1124	33.1557	32.8718	33.0182	33.1278	33.0389	32.8213	33.0212	33.0098	33.0813	33.05	33.1873	33.2061	33.0074	33.1198	33.0216	33.0683	32.9559	33.0131	32.9734	33.1711	32.907
CAZA2_HUMAN	F-actin-capping protein subunit alpha-2	30.3838	30.4916	30.6446	30.4751	30.4268	30.1542	30.4224	30.1167	30.4124	30.3687	30.6258	30.3738	29.991	30.3663	30.0021	30.0131	30.03	30.3667	30.8427	30.3215	30.2993	30.5475	30.4317	30.4535	30.408	30.4483	30.3339	30.546	30.2339	30.3767	30.6438	30.4631	30.3501	30.4433	30.3065	30.4858	30.4701	30.3904	30.4294	30.2685	30.7569	30.6349	30.5429	30.4195	30.4227	30.4572	30.495	30.1839
CBL_HUMAN	E3 ubiquitin-protein ligase CBL	27.9387	27.9578	27.6559	27.9188	27.7311	27.9	27.7327	28.5286	27.7558	27.5767	28.8279	27.7466	27.5637	27.9843	28.2244	NA	28.0827	27.664	28.2051	27.6821	27.8755	28.4021	28.2502	27.9181	28.0851	28.0031	28.0061	28.2512	27.8558	27.8989	27.5491	27.5464	27.897	27.9435	28.0536	28.1165	27.7556	27.8477	27.8871	28.0204	27.5051	27.852	28.4173	27.7062	27.7533	27.7489	27.7442	27.6366
CBPD_HUMAN	Carboxypeptidase D	26.7601	NA	26.0617	25.9599	26.3928	26.7883	26.3385	26.5478	26.4358	25.9398	26.2666	26.2577	26.6499	26.2738	26.2227	NA	26.5674	26.0703	26.0602	NA	26.5013	26.1831	26.2592	26.8388	26.0067	26.2837	26.2685	26.0874	25.8528	26.2773	NA	26.3077	26.6903	26.2861	26.6255	26.0754	26.2331	25.8857	26.267	25.9132	26.4125	26.399	26.2109	26.121	25.8241	26.3918	25.9169	NA
CBPM_HUMAN	Carboxypeptidase M	28.8603	28.9792	28.6607	28.8029	29.0288	28.9249	29.2629	29.0607	29.1786	29.0116	29.4146	28.9304	29.1314	28.8618	29.1407	29.1386	29.2656	29.1594	29.0869	28.9133	28.9737	28.8563	28.8488	28.8382	29.0683	29.0029	29.1657	28.771	29.2855	29.1625	28.9324	29.2558	28.9182	28.8899	28.824	29.0573	29.0785	28.9581	29.0245	29.1214	29.2363	28.8048	28.7723	28.5938	28.9409	28.8948	28.7292	29.2677
CBR1_HUMAN	Carbonyl reductase [NADPH] 1	30.2909	30.1979	30.3511	30.2427	30.0987	30.0375	30.1036	30.044	30.1827	30.0641	30.3988	30.033	30.1258	30.3118	30.1874	29.8401	30.0579	30.2044	30.3275	30.1871	30.149	30.2794	30.2134	30.17	30.1639	30.1104	30.2709	30.2831	29.8656	30.0906	30.0816	30.2491	30.1112	30.2584	30.1224	30.2488	29.9534	29.9717	30.2931	29.9311	30.1168	30.3384	30.1709	30.0407	30.0462	30.1561	30.1187	30.3491
CBSL_HUMAN	Cystathionine beta-synthase-like protein	28.0087	28.0553	27.8916	28.1466	27.9737	28.0769	29.1495	28.2122	27.6353	28.0811	28.1099	28.4327	28.3174	27.8874	27.8988	27.6994	27.9412	27.8591	28.026	NA	28.2591	28.5216	28.6623	28.5802	28.2554	28.4549	28.4985	28.4	28.1867	28.2278	27.9614	28.3484	28.2557	28.7912	28.4225	28.5334	28.0845	28.1889	28.3845	28.4478	28.1694	28.5151	28.2963	28.1759	28.2644	29.002	28.4736	28.2929
CBX3_HUMAN	Chromobox protein homolog 3	31.2467	31.5719	31.3027	31.3574	31.0028	31.2092	31.0426	31.0771	31.2012	31.1047	31.2647	31.1753	31.188	31.0199	31.0443	31.2881	31.1864	31.2628	31.3091	31.2492	31.2481	31.3244	31.5369	31.4939	31.3749	31.1267	31.2857	31.2736	31.4051	31.1247	31.6012	31.3429	30.8227	31.1171	30.9397	31.0754	31.495	31.387	31.1913	31.3338	31.6139	31.355	31.5917	31.5099	31.407	31.3244	31.3518	31.2734
CBX5_HUMAN	Chromobox protein homolog 5	30.0309	30.3064	30.2002	30.0131	30.0561	30.1852	30.3221	29.9858	30.3386	30.2104	30.1636	30.1123	30.051	30.1796	30.298	30.3986	30.2805	30.317	30.131	30.1087	30.0192	30.0893	30.1763	30.1166	30.0525	30.1258	30.0427	30.2978	30.2062	30.3173	30.5909	30.1193	30.0345	30.0222	30.0379	30.1224	30.5346	30.343	30.1185	30.3043	30.4673	30.313	30.5296	30.2196	30.5724	30.1388	30.347	30.3135
CC124_HUMAN	Coiled-coil domain-containing protein 124	NA	27.4648	27.4439	27.6898	27.0531	27.3614	NA	NA	27.2741	27.0994	27.4432	27.5784	25.9076	27.3459	NA	NA	NA	NA	27.0007	NA	27.4274	NA	27.2663	27.5976	27.4021	NA	27.305	27.5979	27.069	27.3988	27.5207	27.649	27.6284	27.1766	27.5387	27.604	NA	27.2798	27.512	NA	27.315	27.6998	27.3054	27.1321	27.5654	27.382	27.2807	26.8488
CC134_HUMAN	Coiled-coil domain-containing protein 134	27.8764	27.3971	27.8558	NA	27.8952	27.5599	NA	27.2353	26.988	NA	27.6436	27.3815	NA	26.9261	NA	NA	27.356	27.3385	27.8796	NA	26.4094	27.6025	NA	27.0409	27.0485	NA	26.1311	NA	26.5547	NA	27.9735	NA	27.1539	27.0763	NA	26.6909	27.5295	27.7741	NA	27.4562	27.4812	27.3586	27.1828	27.3411	27.4208	27.4962	27.4409	NA
CCAR1_HUMAN	Cell division cycle and apoptosis regulator protein 1	30.9345	31.1236	31.1681	30.7261	31.0316	31.1585	31.0149	30.9258	31.1945	31.0918	30.925	30.9881	30.9185	30.8303	31.083	30.8015	31.1513	31.1271	30.9236	30.9717	31.06	31.0902	31.2901	31.0799	31.3261	31.2876	31.0781	31.2538	31.3402	31.25	31.4188	31.1876	31.1078	31.0849	30.9708	31.0229	31.4269	31.1838	31.0408	31.0652	31.2023	30.9516	31.2425	31.1208	31.427	31.2953	31.2763	31.1619
CCAR2_HUMAN	Cell cycle and apoptosis regulator protein 2	31.7619	32.058	32.0376	31.7188	31.8472	31.9662	31.8946	31.7843	32.2028	31.9466	31.798	31.7713	31.7134	31.8176	31.959	31.9593	32.0839	32.035	31.9933	31.8706	31.9033	31.7947	32.0075	31.9874	31.9008	31.9988	31.8991	31.9932	31.8616	31.9617	32.2472	31.8547	31.7983	32.0445	31.6909	31.8178	32.1126	31.8764	31.8134	31.7978	32.0573	31.9482	32.1432	31.9927	32.2514	32.1392	32.079	31.9128
CCD43_HUMAN	Coiled-coil domain-containing protein 43	26.4888	26.4682	26.4284	26.3133	26.3443	NA	26.968	NA	26.3228	NA	27.1319	26.1029	NA	26.4456	26.1295	NA	26.051	26.6665	26.3909	NA	26.3052	25.9837	NA	26.5732	26.0515	26.2399	25.8645	26.614	26.0001	25.626	26.0466	26.1881	NA	26.3988	NA	25.8693	26.5222	25.7084	NA	NA	26.7144	26.2297	NA	26.5534	26.6017	26.3843	26.4847	26.5532
CCD47_HUMAN	Coiled-coil domain-containing protein 47	28.5417	28.0064	28.3016	28.343	28.3773	28.591	27.9597	28.013	28.3357	28.3236	28.567	28.496	28.1339	28.2122	27.8633	28.1543	28.5194	27.9399	28.2557	28.0228	28.3153	28.262	28.2896	28.3874	28.3401	27.96	27.9855	28.5182	28.5374	28.1894	28.668	28.4793	28.7078	28.2836	28.1464	28.3045	28.1577	28.3755	28.3616	28.2282	28.5402	28.0218	28.085	28.2464	28.3701	28.7399	28.3163	28.4526
CCD58_HUMAN	Coiled-coil domain-containing protein 58	29.1564	29.616	29.5331	29.0505	29.4976	29.2795	29.2115	28.9949	29.523	29.4096	29.2513	29.2052	29.1832	29.3739	29.0159	29.1525	29.4157	29.2564	29.0284	29.2072	29.2037	28.9625	29.1889	29.3225	29.3654	29.2241	29.1648	29.2916	29.3103	29.1621	29.424	29.424	29.3159	29.0178	28.9968	29.0832	29.5016	29.1687	29.3878	29.2891	29.385	29.4098	29.3249	29.4054	29.6369	29.4922	29.6025	28.8981
CCDC6_HUMAN	Coiled-coil domain-containing protein 6	27.1434	27.1794	27.1377	27.3767	26.9973	26.9661	27.4099	NA	27.143	26.9493	NA	27.0328	27.2109	26.909	NA	NA	NA	27.3125	NA	27.3614	27.0188	27.3743	26.8437	26.8019	27.1637	26.9492	27.1028	27.0533	26.8953	26.7042	NA	26.508	NA	NA	26.8595	26.8697	27.0251	27.0087	26.8126	26.7163	26.6752	26.7672	26.9282	26.8121	26.8369	26.9643	NA	NA
CD109_HUMAN	CD109 antigen	30.4976	30.4295	30.2968	30.2473	30.3655	30.4055	30.6578	30.1809	30.6291	30.6453	30.3112	30.4162	30.3276	30.3504	30.2882	30.1216	30.5507	30.6046	30.4926	30.5816	30.5043	30.2918	30.5076	30.383	30.5648	30.3518	30.3328	30.2126	30.3842	30.3745	30.3851	30.121	30.454	30.3553	30.2373	30.294	30.2459	30.3224	30.1708	30.2597	30.0671	30.1678	30.1366	30.2071	29.966	30.1625	29.9993	30.026
CD11B_HUMAN	Cyclin-dependent kinase 11B;Cyclin-dependent kinase 11A	29.0645	29.2189	29.4584	29.0691	29.1432	29.2922	29.2427	28.8809	29.0709	29.0679	29.074	28.9133	29.0738	28.9631	28.9677	28.8482	29.3522	29.073	29.0165	28.9171	29.1232	29.091	29.3599	29.1756	29.4463	29.1145	29.247	29.2539	29.0772	29.3936	29.3828	29.2583	29.0565	29.2533	28.9824	29.3092	29.4717	29.3187	29.1232	29.2358	28.9423	29.12	29.4252	29.2439	29.3949	29.1809	29.1791	29.227
CD166_HUMAN	CD166 antigen	31.6181	31.4593	31.7482	31.5716	31.6708	31.746	31.5238	31.6714	31.8775	31.7035	31.6951	31.5992	31.7227	31.6283	31.4523	31.8096	31.8102	31.7045	31.5972	31.658	31.419	31.4532	31.4965	31.4413	31.7967	31.7286	31.4714	31.5366	31.7383	31.8494	31.6272	31.6102	31.843	31.5787	31.731	31.5705	31.8921	31.7015	31.5958	31.572	31.7816	31.5876	31.5078	31.5425	31.7202	31.8	31.5254	31.6218
CD276_HUMAN	CD276 antigen	29.5248	29.5299	29.6344	29.4455	29.178	29.6732	29.2537	29.4166	29.8272	29.6617	29.8835	29.5398	29.6159	29.6099	29.5105	29.8376	29.8051	29.6102	29.5611	29.3596	29.304	29.2564	29.2844	29.3817	29.5252	29.4706	29.462	29.5628	29.7981	29.3634	29.6695	29.7151	29.6864	29.2775	29.3105	29.3622	29.4726	29.3026	29.2606	29.3159	29.5494	29.2526	29.8933	29.3196	29.6724	29.9344	29.5744	29.4842
CD2AP_HUMAN	CD2-associated protein	27.8159	27.5052	27.8938	27.9495	27.7453	27.7564	28.1025	28.031	27.8261	27.8893	27.8053	27.8251	28.1726	27.6046	28.2847	27.1754	27.7722	27.8477	28.0233	27.7942	27.7652	28.1252	28.1798	28.2221	27.6961	28.3019	28.0714	27.9808	27.1824	27.9241	27.6816	27.8937	27.9783	28.297	27.9998	28.4334	27.8637	27.7821	28.1367	28.0376	27.6389	27.5416	27.5278	28.8275	27.634	28.1191	27.5353	28.0572
CD36_HUMAN	Platelet glycoprotein 4	30.7877	30.7921	30.9392	30.7184	30.9144	30.9889	30.9576	30.9505	31.182	30.9704	31.0282	30.7648	30.9961	31.1499	30.6196	30.7954	30.8821	30.9443	31.0567	30.937	30.5247	30.8734	30.7814	30.8208	30.9657	30.7179	30.7892	30.9278	31.0632	30.9946	31.0778	31.0373	31.0588	30.9012	30.8529	30.4125	31.0851	30.769	30.8995	30.7182	31.0182	30.6611	30.8398	30.6792	31.194	31.3953	31.0611	31.1124
CD44_HUMAN	CD44 antigen	30.4221	30.2033	30.5627	30.5384	30.5706	30.6689	30.3542	30.3572	30.5866	30.6027	30.622	30.517	30.4945	30.4948	30.5724	31.0427	30.7984	30.7793	30.5501	30.6865	30.1651	30.4317	30.4098	30.1868	30.6786	30.6385	30.4728	30.4431	30.7864	30.7677	30.7713	30.6916	30.5063	30.3891	30.582	30.4161	30.6886	30.5627	30.5923	30.5059	30.8809	30.6826	30.7281	30.6718	30.8572	30.57	30.9007	30.8677
CD59_HUMAN	CD59 glycoprotein	27.3648	27.9994	27.5547	27.5013	NA	27.8294	NA	27.4554	NA	27.619	27.5513	27.8431	27.2388	27.7955	NA	27.9208	28.1238	27.9364	NA	27.6906	27.3349	27.5429	27.5747	27.6296	27.65	27.281	27.5408	27.8006	27.2198	27.5134	27.6395	27.6404	27.8393	27.7278	27.2845	27.3638	27.6514	27.4824	27.4543	27.5149	27.9381	27.7535	27.8615	27.7686	28.242	28.1227	28.0807	27.7259
CD63_HUMAN	CD63 antigen	28.2822	28.1816	28.5601	28.438	28.4565	28.0311	27.7706	28.0696	27.858	27.9488	28.4209	28.5214	28.612	28.69	28.0505	28.5052	28.8507	28.603	28.5621	29.1916	28.4894	28.1762	NA	28.2913	28.8739	28.1922	28.0809	28.3721	28.3348	28.7885	28.5172	29.0242	29.1222	27.9791	28.3312	28.3579	28.1233	28.331	28.8301	28.5925	29.0653	28.8414	28.99	28.2712	29.3513	29.0156	28.6374	28.8068
CD81_HUMAN	CD81 antigen	31.537	31.7139	31.7951	31.7035	31.743	31.5567	31.9016	31.8287	32.3147	31.8304	32.3173	31.5554	32.0266	32.1149	31.5755	31.6981	31.9441	31.8445	31.9511	31.9151	31.5374	31.4283	31.5154	31.9739	31.7524	31.5316	31.4423	31.5569	31.7434	31.7456	31.6964	31.7024	31.8275	31.5684	31.396	31.6144	31.7129	31.4309	31.8823	31.6213	32.1029	31.7896	31.7003	32.0048	32.0945	32.2321	32.0982	32.1781
CD9_HUMAN	CD9 antigen	28.7828	28.8906	29.1555	28.7231	29.0187	29.1414	29.0287	28.9288	29.2464	29.3311	28.879	29.2662	28.2052	29.129	28.4764	29.0886	29.183	29.3216	29.2166	29.3482	28.9944	28.9882	29.0987	28.9993	29.1248	29.1459	29.0927	29.1731	29.1583	29.1303	29.1625	29.289	28.9916	28.9972	29.1124	29.2816	29.3013	29.1642	28.8163	28.8338	29.3405	29.0001	28.9184	28.7433	29.2943	29.2335	29.2008	29.3347
CD97_HUMAN	CD97 antigen	30.0601	29.9796	29.9287	29.7617	30.0121	30.1039	29.9775	29.9371	30.2473	30.0223	30.1107	29.9057	30.0976	29.8858	30.0392	30.0692	30.097	30.2876	29.9942	29.9791	29.9725	29.9516	30.0131	29.9958	30.212	29.975	30.1071	29.8333	30.0847	30.2629	30.0487	30.0788	30.2101	29.9859	29.9582	30.0091	30.2401	30.057	29.8959	29.9557	30.2588	30.2151	30.1314	30.1461	30.1661	29.9687	30.0996	30.0103
CD99_HUMAN	CD99 antigen	27.6757	27.5907	27.8553	27.8858	27.7728	27.9348	28.0025	27.8657	27.9135	28.1778	27.8652	27.9838	28.132	27.213	27.9431	28.468	28.4049	28.0947	28.0326	28.4581	27.3968	27.4394	27.3076	27.4135	27.9164	27.7445	27.6085	27.5646	27.8601	27.7316	27.9821	27.4763	27.531	27.4059	27.466	27.697	27.8687	27.4653	27.7056	27.6577	28.187	28.0117	28.2076	27.5874	27.558	27.4554	27.9438	27.8635
CDC20_HUMAN	Cell division cycle protein 20 homolog	29.0627	29.6733	29.1633	29.1848	28.9627	29.3646	28.9571	29.1756	28.8976	29.307	29.5184	29.2812	29.1533	29.2996	29.0757	29.3358	28.9991	28.8919	29.2677	28.9564	29.2297	28.8684	29.1079	28.9522	29.0122	28.6802	29.3465	29.1445	28.9935	28.9002	28.9248	29.0667	29.0732	29.0028	29.2073	28.9385	28.8489	29.2736	29.1904	29.0522	29.1355	29.2359	28.964	29.0501	28.2263	28.8702	28.8552	28.6743
CDC37_HUMAN	Hsp90 co-chaperone Cdc37	31.3118	31.1807	31.4846	31.4331	31.3513	30.9198	31.3408	31.0677	31.0158	31.0152	31.4417	31.0846	31.1636	31.2536	31.1365	31.1393	31.1464	31.1525	31.5832	31.2893	31.3866	31.2699	31.2689	31.3694	31.0326	31.2438	31.178	31.2876	30.982	31.1295	31.5114	31.264	31.0619	31.1939	31.1904	31.1806	31.0537	31.1691	31.3608	31.0315	31.453	31.3743	31.5321	31.4512	31.3856	31.3038	31.3982	31.2293
CDC42_HUMAN	Cell division control protein 42 homolog	31.6957	31.5071	31.647	31.8192	31.5232	31.8447	31.6617	32.0406	31.6047	31.7789	31.7485	31.8022	31.9314	31.9113	31.6832	31.5466	31.6651	31.7297	31.6396	31.8794	31.6239	31.9074	31.5434	31.4864	31.7978	31.8245	31.6967	31.7913	31.9165	31.7925	31.7554	31.9413	31.7943	31.7032	31.8397	31.8515	31.7105	31.5616	31.8895	31.6801	31.5804	31.6692	31.7257	31.45	31.5738	32.1327	31.6447	31.8235
CDC5L_HUMAN	Cell division cycle 5-like protein	30.2705	30.3288	30.5294	30.1194	30.4292	30.6425	30.5577	30.0609	30.4929	30.6297	30.5121	30.4883	30.3211	30.7006	30.0462	30.4867	30.3432	30.5183	30.1571	30.2598	30.136	30.1551	30.2049	30.1441	30.2245	30.5146	30.0992	30.46	30.4296	30.3116	30.5323	30.428	30.0712	30.0997	30.3061	30.0663	30.436	30.3736	30.3432	30.213	30.2167	30.3213	30.4013	30.1881	30.7694	30.3955	30.5074	30.4016
CDC73_HUMAN	Parafibromin	28.3743	28.4703	28.3068	28.0427	28.4099	28.5282	28.7074	28.7671	28.5945	28.3768	28.9093	28.2566	28.5906	28.2439	28.4059	28.3722	28.7515	28.4581	28.3264	28.4472	28.3077	28.6181	28.6643	28.6235	28.6552	29.0974	28.5743	28.525	28.7545	28.5405	28.5012	28.813	28.6778	28.7848	28.5981	28.7532	28.6707	28.5009	28.208	28.6373	28.0979	28.4689	28.5017	28.6673	28.8689	28.7867	28.2895	28.7102
CDK1_HUMAN	Cyclin-dependent kinase 1	29.5668	29.0663	29.4147	29.7628	29.3126	29.1439	29.4911	29.4454	29.3381	29.1379	29.1492	29.3215	29.6335	29.0016	29.2003	29.2205	29.2526	28.9316	29.1733	29.0372	29.8249	29.7353	29.8881	29.4241	29.7365	29.8699	29.8052	29.5514	29.9489	29.2928	29.2737	29.4689	29.7397	29.8086	30.1354	29.7415	29.353	29.8969	29.6663	29.685	29.2603	29.6411	29.4395	29.7361	28.8671	29.6713	28.954	29.3131
CDK5_HUMAN	Cyclin-dependent-like kinase 5	27.3176	27.9228	27.7595	27.5319	27.4413	27.4067	28.2364	27.7625	27.2896	27.6621	28.3201	27.4442	27.3493	28.161	27.6341	26.8961	27.3857	27.5083	27.4818	27.5997	27.7039	27.616	27.9176	27.666	27.5082	27.6058	27.4921	27.8759	27.6435	27.6254	27.2171	27.281	27.8032	27.7264	27.4902	27.5137	27.3397	27.8605	27.8285	27.7696	26.868	27.3404	26.9927	26.9347	28.2015	28.0508	27.9407	28.0416
CDK6_HUMAN	Cyclin-dependent kinase 6	29.572	29.4499	29.6654	29.4492	29.6347	29.4916	29.5446	29.5122	29.3725	29.2638	29.768	29.5479	29.5411	29.8502	29.5611	29.502	29.3373	29.4731	29.8042	29.506	29.4726	29.7051	29.772	29.9731	29.5726	29.7743	29.7709	29.909	29.4579	29.5172	29.7736	29.6941	29.5633	29.9151	29.7218	29.6896	29.4326	29.4516	29.7658	29.7995	29.4424	29.7039	29.5113	29.7408	29.5661	29.6336	29.477	29.4631
CDN2C_HUMAN	Cyclin-dependent kinase 4 inhibitor C	27.4	27.3343	27.367	27.4391	27.1002	26.9835	27.8075	NA	26.2911	27.2838	27.3681	27.081	27.2663	27.4047	27.3305	27.5754	NA	NA	27.178	NA	27.2443	27.3128	27.1631	26.975	27.2184	NA	27.1127	27.4904	26.9503	27.052	27.3077	NA	27.0622	NA	27.2385	27.1063	27.3037	27.3142	27.3077	26.8749	27.2432	27.3919	27.2181	27.4239	27.1173	NA	27.3948	27.2293
CDV3_HUMAN	Protein CDV3 homolog	29.9811	29.9503	30.0431	29.9618	29.8603	29.6964	29.8984	29.6874	29.4267	29.5335	30.0299	29.7694	29.6558	29.7508	30.1473	29.834	29.7134	30.0728	30.0209	29.7915	29.815	29.9615	29.9324	29.8979	29.6247	29.8159	30.0222	30.1306	29.8371	29.825	29.837	29.6974	29.7445	30.0235	30.0579	29.8969	29.7325	29.8055	30.0169	29.8562	29.8392	30.0887	29.9282	29.9376	29.8246	29.7765	29.9548	29.919
CE170_HUMAN	Centrosomal protein of 170 kDa	27.8881	28.5201	27.7423	28.2287	28.458	28.5217	28.6473	28.3482	27.9726	28.4611	27.8325	28.9703	28.0017	NA	NA	NA	28.2247	27.9466	28.8149	27.617	28.2105	28.1932	28.1023	27.9873	27.9417	28.3326	28.3455	28.518	28.117	28.2154	28.3072	28.2512	27.86	28.1313	28.3719	27.9759	28.5324	28.3418	28.6197	28.1673	28.29	28.5772	28.3839	28.1678	28.4595	28.0903	28.4741	NA
CEBPZ_HUMAN	CCAAT/enhancer-binding protein zeta	28.01	27.9751	28.1665	27.9661	28.361	28.59	28.1361	28.1805	28.8098	28.3988	27.9272	28.2173	28.5209	28.0656	28.1766	26.7066	28.1665	28.1976	28.1944	28.4226	28.2505	27.8745	28.0532	27.6951	28.0623	28.1958	28.0292	28.0082	28.1087	28.4078	28.3871	28.1215	28.1194	28.0767	28.1013	28.0843	27.9417	28.2627	28.0017	28.2088	28.1051	27.9727	28.0044	27.8918	28.1336	28.1439	28.0663	28.154
CECR5_HUMAN	Cat eye syndrome critical region protein 5	28.2205	27.7003	27.9862	28.397	28.3321	28.575	28.6193	28.4251	28.5505	28.3876	28.3655	27.923	28.4855	28.4735	28.0538	28.165	28.4116	28.3745	28.2488	28.5015	27.7221	28.0146	27.7759	27.8392	28.0398	28.2108	27.9617	27.8589	28.1638	28.2944	28.1808	28.2311	28.0501	28.0287	28.3069	28.0477	28.4657	28.096	28.2039	28.154	28.0168	27.3742	28.0598	27.8495	28.3024	28.4313	28.477	28.271
CELF1_HUMAN	CUGBP Elav-like family member 1	27.9833	28.2179	28.3096	27.8884	27.9991	28.242	28.3516	28.2755	28.1131	28.4042	28.1157	28.1627	28.1153	28.18	27.7638	28.1607	28.2529	28.0969	28.2212	28.1779	28.2289	28.4082	28.4467	28.3443	28.3136	28.3783	28.0886	28.526	28.47	28.2621	28.5757	28.3287	28.6352	28.4809	28.0147	28.274	28.4115	28.2542	28.2348	28.4469	26.9683	28.3911	28.533	28.2929	28.6036	28.5096	28.07	28.3927
CELF2_HUMAN	CUGBP Elav-like family member 2	30.6306	30.9514	30.5488	30.4877	30.6964	30.717	30.8268	30.5013	30.8696	30.6045	30.5894	30.6632	30.483	30.5675	30.6009	30.6811	30.7264	30.6597	30.4188	30.6118	30.5324	30.4954	30.5983	30.715	30.7563	30.8205	30.5863	30.6746	30.7433	30.5981	30.6168	30.6902	30.2861	30.6389	30.4154	30.5776	30.737	30.5129	30.674	30.5153	30.5056	30.5709	30.5142	30.6282	30.9202	30.7867	30.7623	30.5973
CERS2_HUMAN	Ceramide synthase 2	28.7783	28.7246	28.9978	28.8347	28.9648	29.3058	28.5281	28.6065	28.7737	29.0515	29.3878	29.0025	29.4223	29.0836	28.63	28.9035	28.9821	28.4666	28.9478	28.8148	29.3135	29.0893	29.2065	29.473	29.2786	29.0175	29.0249	29.0938	29.2483	28.9747	29.0676	29.4003	29.5534	28.8463	29.3495	29.0864	29.1798	29.1581	29.3369	29.5543	29.3281	29.0771	28.9306	28.7878	29.2179	29.1467	28.8588	29.4029
CH082_HUMAN	UPF0598 protein C8orf82	25.8682	24.7252	26.0425	26.1257	26.1006	25.8271	NA	26.0912	25.6074	25.5718	26.0422	25.9302	25.9567	NA	NA	NA	26.0528	25.9214	25.985	25.6669	25.5473	26.0947	25.8897	NA	NA	NA	26.1724	NA	NA	NA	NA	26.1035	25.9666	NA	NA	25.2805	25.5107	26.0081	NA	24.8783	25.6957	25.0098	NA	26.1634	25.9003	26.3108	25.7878	26.6564
CH10_HUMAN	10 kDa heat shock protein, mitochondrial	34.0646	34.2598	34.2598	33.8895	34.2723	34.3708	34.3256	33.9554	34.3551	34.2793	34.3647	34.1532	34.0867	34.3001	33.9646	34.4407	34.2671	34.2091	34.0166	34.0518	34.3726	34.2964	34.3679	34.5258	34.4165	34.601	34.3058	34.5503	34.6751	34.689	34.7362	34.8164	34.4998	34.3693	34.2551	34.4149	34.7442	34.4575	34.2883	34.4407	34.3996	34.446	34.2621	34.3864	34.851	34.754	34.891	34.7003
CH3L1_HUMAN	Chitinase-3-like protein 1	32.316	32.5408	32.446	32.3228	32.459	32.2422	32.1972	32.1463	32.4443	32.3259	32.3691	32.4928	32.0277	32.1955	32.0294	32.2915	32.31	32.1416	32.1279	32.0522	32.4911	32.4424	32.5364	32.4255	32.5247	32.2819	32.3758	32.2962	32.3961	32.3385	32.6017	32.4589	32.4062	32.3429	32.1439	32.2791	32.4714	32.473	32.3675	32.3797	32.4863	32.4629	32.5759	32.4468	32.5572	32.3945	32.1506	32.0787
CH60_HUMAN	60 kDa heat shock protein, mitochondrial	35.8164	35.4418	35.8541	35.5747	35.8096	36.2147	35.809	35.8483	36.0032	35.9936	35.9677	35.828	35.839	35.9756	35.7281	35.9252	35.9951	35.9894	35.8154	35.7959	35.9443	35.7533	35.5888	35.9564	36.0019	36.161	35.8763	36.0721	36.1799	36.0862	36.1931	36.299	36.1216	35.8061	36.1162	36.0857	36.2673	36.0464	35.9414	36.0806	36.0685	35.8189	35.6721	35.4792	36.3267	36.3424	36.4211	36.1736
CHCH2_HUMAN	Coiled-coil-helix-coiled-coil-helix domain-containing protein 2;Putative coiled-coil-helix-coiled-coil-helix domain-containing protein CHCHD2P9, mitochondrial	29.0192	29.1435	29.0479	28.5265	28.7283	28.5978	29.1076	29.1127	28.8589	28.3159	28.9409	28.9075	28.9856	29.1035	28.8565	29.3501	28.9757	29.1641	28.7734	28.836	29.3729	29.3579	29.5028	29.3119	29.3869	29.6115	29.3804	29.4443	29.5519	29.2463	29.2522	29.1249	29.3859	29.5338	29.3237	29.4443	29.705	29.628	29.0721	29.3709	29.3908	29.4358	29.4882	29.8206	29.8771	29.1549	29.252	28.9402
CHD4_HUMAN	Chromodomain-helicase-DNA-binding protein 4	30.1153	30.0093	30.1516	30.0846	30.3133	30.3412	30.3172	30.2468	30.4629	30.374	30.3349	30.6389	30.2532	30.3772	29.6631	30.5275	30.5939	30.3666	30.1625	30.3584	30.3602	30.3081	30.1904	30.0558	30.28	30.4966	30.3253	30.3684	30.4524	30.4366	30.405	30.3803	30.5784	30.1137	30.2677	30.1696	30.3938	30.4764	30.2063	30.3397	30.3358	30.1882	30.2564	30.3124	30.462	30.2149	30.2779	30.5048
CHERP_HUMAN	Calcium homeostasis endoplasmic reticulum protein	29.5397	29.5179	29.6323	29.474	29.5412	29.5747	29.7549	29.4178	29.8412	29.4858	29.5673	29.5979	29.5747	29.5852	29.5651	29.7999	29.5885	29.6151	29.5118	29.5967	29.6157	29.6384	29.8809	29.6196	29.7239	29.5044	29.854	29.7924	30.026	29.8328	29.9477	29.3162	29.6786	29.8823	29.6923	29.8684	30.0515	29.7911	29.6419	29.8053	29.3629	29.3211	29.8198	29.5821	29.6901	29.6825	29.295	29.6694
CHID1_HUMAN	Chitinase domain-containing protein 1	29.9306	30.2528	30.2361	30.0268	30.2572	30.2145	30.0828	30.0284	30.0621	30.0206	29.8796	30.2366	29.9581	29.6468	30.051	29.9389	30.1399	29.9387	29.8755	29.7436	30.1455	30.0673	30.5428	30.1905	30.1924	30.1971	29.9836	29.9955	30.3036	30.2938	30.2069	30.0428	30.5237	29.9093	29.8389	30.1223	30.3347	30.2901	29.9937	30.2773	29.9668	30.0282	30.2182	30.3643	29.9342	29.8428	30.0646	29.8911
CHM1A_HUMAN	Charged multivesicular body protein 1a	26.57	NA	27.3618	26.7425	26.7374	26.621	26.6352	27.1892	NA	NA	27.2419	27.0888	NA	NA	NA	NA	NA	26.8196	26.9088	27.2961	26.6555	26.7178	26.5709	26.7396	26.9313	NA	NA	26.9616	26.5911	26.4895	26.8309	25.2051	NA	26.7964	26.5327	NA	26.4153	26.6324	26.6171	26.6749	NA	26.9082	26.3145	NA	26.9272	26.4258	26.9222	27.4991
CHM4B_HUMAN	Charged multivesicular body protein 4b	29.2889	29.1999	29.4284	29.376	29.2574	29.1068	29.2382	29.1252	28.7816	29.045	29.4413	29.1281	29.0335	29.4229	29.126	29.2352	29.1602	29.1306	29.3756	29.1214	28.9919	29.0724	28.8359	28.7675	28.9201	28.845	28.9608	29.103	28.7987	28.8986	29.1939	29.1295	28.9524	28.9842	29.006	28.9835	29.0561	28.706	29.0916	29.0388	29.5084	29.4221	29.4329	29.1481	29.4465	29.3032	29.5249	29.1511
CHMP5_HUMAN	Charged multivesicular body protein 5	27.5701	27.7365	28.1712	27.7818	27.9573	27.6071	28.0195	27.6563	27.5598	27.3332	28.3838	27.8816	27.459	27.9762	NA	27.097	NA	27.3763	28.1065	27.6792	27.9925	28.0419	28.1355	28.2116	27.9726	27.679	28.2592	28.0468	27.6332	27.9427	28.0152	27.673	27.9079	28.1472	28.0618	27.943	27.7851	28.1076	28.4225	27.7842	28.1507	28.1373	27.928	27.5382	27.8445	28.409	28.4743	28.4872
CHMP7_HUMAN	Charged multivesicular body protein 7	25.5495	25.0855	24.6707	25.9316	25.8137	25.2677	24.6286	25.69	25.0161	25.1923	25.4874	25.2515	25.8856	24.614	26.2731	25.381	25.1401	25.304	25.2054	25.5739	NA	25.1131	24.7018	NA	25.4983	25.5774	25.2925	25.2685	25.3692	25.7052	23.164	24.5744	25.7538	26.0586	25.7961	25.1128	NA	25.0916	25.3925	25.9053	25.0913	26.0937	NA	26.513	24.9294	25.4807	25.2682	24.2895
CHP1_HUMAN	Calcineurin B homologous protein 1	28.2347	28.1276	28.5508	28.1869	28.6029	28.5933	28.2306	27.6902	28.6517	28.4392	28.3967	28.5629	28.1303	28.6354	NA	27.3619	27.8454	28.3399	28.5326	28.4488	27.969	28.0274	28.3405	28.3494	28.1722	28.0204	27.9943	28.3892	28.2105	28.429	28.433	28.6034	28.4286	27.6366	28.0066	28.29	28.1074	27.9001	28.1188	28.2425	28.1694	27.8004	28.041	28.0015	28.7266	28.6155	28.3651	28.1296
CHRC1_HUMAN	Chromatin accessibility complex protein 1	26.5965	26.8797	27.1209	26.7977	26.9376	26.7519	26.8699	26.736	27.0488	NA	27.144	26.0897	27.1745	NA	NA	NA	26.676	NA	27.0243	26.9144	26.974	26.8567	27.057	27.0421	27.2624	27.1721	27.1451	27.1073	26.9493	27.0451	27.4113	26.9963	26.7922	27.294	26.6684	27.2837	27.3769	27.1674	26.7879	NA	26.6584	26.9902	27.0342	26.7543	27.1298	27.2208	27.2737	26.7927
CHRD1_HUMAN	Cysteine and histidine-rich domain-containing protein 1	30.6487	30.3836	30.4461	30.4533	30.4313	30.2364	30.5463	30.4402	30.1695	30.0911	30.6051	30.4534	30.4942	30.5276	30.5338	30.5973	30.4334	30.5772	30.5762	30.6135	30.5165	30.6309	30.5565	30.5658	30.5705	30.4655	30.8276	30.7079	30.5721	30.4005	30.5934	30.5966	30.4915	30.641	30.6154	30.5269	30.4088	30.4589	30.5816	30.5069	30.4543	30.529	30.579	30.4631	30.6807	30.6205	30.8044	30.4031
CHTOP_HUMAN	Chromatin target of PRMT1 protein	27.1618	27.3628	27.7021	NA	26.8049	NA	27.1292	27.1538	26.5376	27.1769	27.0192	NA	27.283	27.0356	27.2698	NA	26.7212	NA	NA	NA	26.5894	27.038	26.3797	27.3375	26.7269	26.5813	NA	NA	NA	26.8253	26.9259	NA	27.1555	26.9069	NA	27.1593	NA	27.034	26.8038	26.6108	27.5743	27.7824	27.6437	27.3662	27.6018	27.2729	27.7005	27.7214
CIAO1_HUMAN	Probable cytosolic iron-sulfur protein assembly protein CIAO1	28.0727	NA	27.9458	27.9604	27.7916	NA	27.005	27.7695	NA	NA	NA	27.7929	26.9187	27.7729	27.4152	27.5983	26.9021	NA	27.5822	27.3565	27.4589	26.9468	27.3932	27.6727	26.1178	27.5216	NA	27.163	NA	27.291	27.6022	27.2504	27.2325	27.2928	27.3475	27.3496	27.1799	NA	27.3155	27.3243	27.7035	27.8233	27.9814	27.4888	27.7947	NA	27.2975	27.218
CIRBP_HUMAN	Cold-inducible RNA-binding protein	27.7681	28.0957	27.902	27.0509	NA	28.037	27.767	27.6713	27.9413	28.0103	27.606	27.4511	27.581	27.817	27.7188	NA	27.8843	27.7654	27.7039	NA	28.1618	27.4485	27.5825	26.7441	27.7274	27.6803	27.1526	27.7325	27.5237	27.8641	27.8118	28.1238	27.071	27.306	27.6465	NA	27.6782	27.8394	27.9555	NA	NA	28.0542	27.7007	NA	27.75	27.7887	27.5662	27.4321
CISD2_HUMAN	CDGSH iron-sulfur domain-containing protein 2	28.5337	28.7979	28.4743	NA	29.1157	28.5665	28.6697	28.2451	28.0646	28.8943	28.8643	28.7627	28.3974	29.2352	28.2273	28.4833	28.6525	28.8618	28.5611	28.2364	28.7689	28.548	28.4394	28.9789	28.5791	28.4476	28.2739	29.0943	28.9788	28.5088	28.8215	29.2153	29.1237	28.3522	28.7945	28.4753	28.9836	28.566	28.6435	28.7174	28.9001	28.8806	28.5052	28.2141	28.7375	29.2957	28.6719	29.0107
CISY_HUMAN	Citrate synthase, mitochondrial	31.6039	31.3021	31.728	31.368	31.5626	32.0697	31.539	31.7879	31.8336	31.6958	31.6205	31.733	31.6588	31.6459	31.4891	31.6648	31.7899	31.6451	31.5163	31.7106	31.9334	31.6775	31.4663	31.9391	31.8707	31.8866	31.8554	31.9248	31.997	32.0782	32.0922	32.2252	32.2123	31.767	31.9906	31.9434	32.0599	31.8672	31.7761	31.9078	31.8648	31.7158	31.799	31.465	32.0661	31.9118	32.1211	31.7553
CK5P3_HUMAN	CDK5 regulatory subunit-associated protein 3	28.7198	28.9012	28.7998	28.5917	28.9405	28.896	28.6466	28.6768	28.9691	28.7339	28.7199	28.7773	28.5508	28.6036	28.7627	28.6421	28.7702	28.8068	28.683	28.6302	28.9549	28.8546	29.0061	29.0532	29.1421	28.8444	28.8596	28.9816	29.0521	28.955	29.0232	28.9983	28.875	28.8189	28.647	28.7111	28.9415	28.9127	28.9602	28.9458	28.7417	28.6281	29.1367	29.0395	28.909	28.8082	28.7067	29.2476
CKAP4_HUMAN	Cytoskeleton-associated protein 4	30.1179	30.1641	30.3168	29.9214	30.1678	30.6145	30.4247	30.3214	30.3674	30.5107	30.5061	30.37	30.2336	30.603	30.2775	30.2718	30.1107	30.2775	30.0854	30.2384	30.2725	29.9982	30.0899	30.2033	30.212	30.1979	30.0615	30.4446	30.3829	30.2475	30.3906	30.4284	30.3091	29.852	30.313	30.0674	30.2507	30.1993	30.1621	30.4253	30.7064	30.2135	30.0651	30.0417	30.501	30.7749	30.6507	30.3381
CKAP5_HUMAN	Cytoskeleton-associated protein 5	27.5936	28.0498	27.7177	27.4422	27.6873	27.5571	27.9449	27.5189	27.7211	27.3862	27.8372	27.4889	27.5906	27.5724	27.5274	26.7985	27.2013	27.2284	28.158	27.5013	27.5659	28.0521	27.9596	27.943	27.4774	27.4353	27.2548	27.5048	27.3925	27.6371	27.2827	27.265	27.4634	27.3235	27.7638	27.6585	27.1607	27.5785	27.8053	27.5466	28.5387	27.1683	28.1497	28.0868	26.8318	27.4236	27.6416	27.5359
CLCA_HUMAN	Clathrin light chain A	30.3636	30.3501	30.4123	30.571	30.3116	30.4868	30.4345	30.3165	30.2517	30.4957	30.4261	30.3726	30.3736	30.3706	30.4293	30.526	30.5677	30.5963	30.4695	30.5126	30.5274	30.5673	30.4721	30.7922	30.6819	30.4879	30.5363	30.6757	30.5675	30.4184	30.8173	30.5122	30.2602	30.4952	30.7436	30.5458	30.7023	30.5348	30.5973	30.5406	30.9566	30.7193	30.9171	30.4973	30.8815	30.181	30.6515	30.7137
CLCB_HUMAN	Clathrin light chain B	27.8458	NA	NA	27.9201	NA	28.0084	27.637	NA	NA	NA	28.1501	NA	NA	NA	28.3773	28.703	NA	NA	28.4661	NA	28.4298	28.3616	28.3491	28.5642	28.6033	28.7835	28.5138	29.1675	28.6106	28.6479	29.1595	28.0316	27.7401	28.7339	28.5523	28.5433	28.8167	28.5254	28.679	28.4084	28.898	NA	29.1096	28.6289	NA	NA	NA	28.6838
CLH1_HUMAN	Clathrin heavy chain 1	35.2594	35.2722	35.2578	35.3167	35.3264	35.1926	35.2277	35.2356	35.207	35.2143	35.2106	35.2008	35.2346	35.1155	35.2453	35.0951	35.1125	35.1356	35.1659	35.2342	35.3331	35.334	35.387	35.2575	35.3617	35.2244	35.3249	35.1941	35.2472	35.1818	35.2034	35.1443	35.297	35.2871	35.2437	35.2559	35.1584	35.2457	35.3062	35.2208	35.3402	35.377	35.4348	35.3658	35.2531	35.2441	35.1992	35.2059
CLIC1_HUMAN	Chloride intracellular channel protein 1	34.1198	34.1381	34.1355	34.2118	33.8461	33.8052	34.1937	33.8404	33.8765	33.8873	34.1697	34.0841	33.7535	34.2393	33.75	33.728	33.7153	33.9265	34.1116	33.861	33.8474	34.0399	33.9533	33.9643	33.8548	33.8653	33.9993	34.1348	33.6632	33.7738	33.9454	33.7979	33.6877	34.022	33.9164	33.9576	33.6243	33.8486	33.9017	33.7894	34.1924	34.066	33.9746	34.045	34.0767	33.9683	34.0981	33.8943
CLIC4_HUMAN	Chloride intracellular channel protein 4	30.314	30.3837	30.2191	30.4878	30.2138	30.3379	30.0619	30.1999	30.3581	30.2771	30.4127	30.4133	30.3155	30.3196	29.9185	30.1285	30.4408	30.3286	30.5159	30.2383	30.428	30.0145	30.2621	30.3873	30.1268	29.5838	30.4213	30.6107	29.9255	30.3872	30.5822	30.2359	29.3748	30.538	30.5193	30.2465	30.3764	30.2736	30.4086	30.4397	30.6619	30.4633	30.3036	30.3999	30.4559	30.0865	30.4211	30.5438
CLP1L_HUMAN	Cleft lip and palate transmembrane protein 1-like protein	27.3992	27.149	26.8126	27.0118	26.9766	27.5402	27.1055	27.6653	27.5374	27.3341	27.0314	27.1369	26.7749	27.0036	27.0745	NA	27.3427	26.9146	26.9082	26.9997	26.9884	NA	NA	27.2601	27.0859	27.6262	27.0312	26.8985	27.4719	26.7752	26.6422	NA	27.4213	26.6216	NA	27.1889	NA	27.1332	NA	27.2832	26.8046	26.7452	26.8633	26.6667	26.5283	26.5889	26.8007	27.0028
CLPB_HUMAN	Caseinolytic peptidase B protein homolog	28.434	28.6497	28.6649	28.5081	28.9246	28.8043	28.7707	28.8262	28.9337	28.6473	28.8925	28.0644	28.8352	28.416	28.6528	28.6711	28.7118	28.8865	28.793	28.9586	28.7307	28.3639	28.5402	29.044	28.7492	28.6833	28.4247	28.5815	28.9214	28.5427	28.8742	28.6459	28.2624	28.6856	28.2612	28.6403	28.4959	28.5716	28.3922	28.4199	28.8151	28.7428	29.1069	28.8828	28.7553	28.5825	28.854	28.679
CLPP_HUMAN	ATP-dependent Clp protease proteolytic subunit, mitochondrial	28.4833	NA	28.2943	28.1153	28.7334	28.7355	28.5249	28.3863	28.6931	28.757	28.4773	28.3702	NA	27.9545	28.5481	28.6455	28.4823	28.5786	28.1488	28.147	28.0047	28.5767	27.8778	28.4494	28.554	28.638	28.3533	28.6247	28.4168	28.2867	28.8609	28.3759	27.6049	28.1521	28.789	28.0471	28.4854	28.244	28.7628	28.0056	28.5614	28.246	28.609	28.3004	29.0994	28.6608	28.7493	28.623
CLPX_HUMAN	ATP-dependent Clp protease ATP-binding subunit clpX-like, mitochondrial	27.97	27.4642	28.0254	27.8203	28.0027	28.6268	27.9449	27.7042	28.4174	NA	28.1395	28.2986	27.9138	28.2929	28.1226	NA	27.4955	27.8896	27.6075	28.0691	28.0138	NA	27.5142	28.3588	27.4751	27.6278	NA	28.2253	27.7794	28.2341	28.3035	28.7339	27.8471	27.9071	27.8917	27.9226	28.197	28.3546	28.0097	28.4105	28.2397	27.6232	27.1225	27.1774	27.7542	28.2203	28.4307	NA
CMC2_HUMAN	Calcium-binding mitochondrial carrier protein Aralar2	26.8591	26.5362	26.8364	26.6588	27.1202	27.1317	27.352	27.1439	27.9259	26.876	27.4898	26.9734	26.9553	27.2952	26.8717	NA	27.1358	26.9043	27.1371	26.7984	27.1872	26.6274	27.0162	26.5743	26.8598	27.2066	27.2334	26.9326	27.3843	27.2991	27.0501	26.995	27.2938	27.2341	26.6455	27.1708	26.6411	NA	NA	27.3025	26.5575	26.4552	26.6517	26.4134	26.9705	26.9576	27.219	27.1966
CMPK2_HUMAN	UMP-CMP kinase 2, mitochondrial	NA	NA	25.4974	25.3391	NA	NA	NA	NA	26.1431	NA	NA	NA	NA	25.9444	NA	NA	NA	25.365	NA	NA	NA	NA	25.376	26.0019	NA	25.7875	NA	25.6252	NA	NA	25.4801	26.0291	25.5312	NA	NA	NA	NA	NA	NA	26.0252	25.7791	26.3977	NA	NA	25.8665	26.1265	25.8044	26.0527
CN159_HUMAN	UPF0317 protein C14orf159, mitochondrial	26.9804	26.9616	27.3519	26.9765	27.393	27.4051	27.3386	27.2041	27.6534	27.2758	27.5349	27.4774	27.5633	27.4188	27.117	NA	27.6362	27.373	27.369	27.2852	27.4296	27.0449	27.041	27.8253	27.7995	27.2855	26.9437	27.3261	27.3456	27.546	27.4152	27.359	27.56	26.7719	27.3523	27.5885	27.494	27.13	27.1035	27.3201	27.5686	27.2087	26.8765	26.9226	27.7589	27.3513	27.3948	27.6385
CN166_HUMAN	UPF0568 protein C14orf166	30.5374	30.5077	30.5189	30.3579	30.343	30.7794	30.5147	30.4336	30.3064	30.4802	30.4404	30.3483	30.7802	30.4097	30.45	30.138	30.4033	30.429	30.6295	30.2843	30.4582	30.3947	30.464	30.4228	30.6713	30.4481	30.3178	30.3817	30.2149	30.3744	30.4721	30.4131	30.5328	30.2946	30.5064	30.56	30.4588	30.4588	30.4174	30.4664	30.4153	30.5454	30.4071	30.2806	30.3258	30.5302	30.256	30.2895
CN37_HUMAN	2,3-cyclic-nucleotide 3-phosphodiesterase	30.4998	30.3321	30.5315	30.4992	30.3441	30.5469	30.5457	30.6598	30.4802	30.4949	30.4717	30.4839	30.5285	30.5335	30.403	30.4532	30.7568	30.6153	30.4542	30.5739	30.4629	30.4939	30.5527	30.4723	30.6225	30.5885	30.6012	30.4453	30.6557	30.6336	30.674	30.761	30.6651	30.5303	30.4803	30.5998	30.6129	30.684	30.6748	30.6149	30.7025	30.4852	30.6047	30.4973	30.7478	30.7394	30.6792	30.5407
CNBP_HUMAN	Cellular nucleic acid-binding protein	30.3964	30.5417	30.7096	30.5669	30.3253	30.3626	30.5549	30.5669	30.0906	30.2959	30.2154	30.3844	30.6296	30.6918	30.7454	30.6175	30.4166	30.7231	30.615	30.7173	30.3252	30.3406	30.3126	30.0765	30.4082	30.2559	30.2761	30.5984	30.4429	30.6115	30.6746	30.2748	30.2307	30.3612	30.5759	30.6386	30.5646	30.4425	30.3696	30.2963	30.53	30.8692	30.46	30.694	30.9792	30.744	31.308	30.4888
CND1_HUMAN	Condensin complex subunit 1	26.9848	26.7452	26.135	27.0351	27.1974	26.6061	26.3422	26.8792	26.6251	26.8214	26.3946	26.5646	26.8963	26.3161	27.4977	26.7405	26.7291	27.0252	26.4903	26.8326	26.5623	26.8547	26.8152	26.2081	26.9863	27.0875	27.0246	27.1718	26.7348	26.9138	25.1766	26.1041	26.5205	27.2669	26.7445	26.9428	26.4739	26.6859	26.5633	26.7462	26.0803	26.7021	26.773	27.4836	24.9612	26.6296	25.9472	25.7162
CND3_HUMAN	Condensin complex subunit 3	26.8235	26.3263	26.1017	26.937	27.0032	26.2973	26.2319	26.7793	26.1765	26.2867	25.9335	26.944	26.5976	26.1508	26.2327	26.6399	26.4161	26.1272	26.4798	26.3382	26.4531	26.4367	26.3695	26.4277	26.3987	25.6316	26.5347	26.3048	25.8619	25.9394	26.4526	26.1118	26.0584	27.1363	26.0098	26.8162	25.4445	26.2925	26.3388	25.997	26.1991	25.7582	25.8465	26.2075	25.7941	26.0029	25.619	26.1104
CNDD3_HUMAN	Condensin-2 complex subunit D3	27.2904	26.5986	26.2345	26.5929	27.3225	27.6537	26.2099	27.9739	26.6306	26.5728	26.1668	26.5519	27.3796	27.2058	26.9662	26.4691	26.8525	26.8693	26.4649	26.5734	26.3065	26.2106	26.8856	27.0274	26.9766	27.1701	26.5822	26.2698	26.7951	27.0088	NA	26.3453	26.8976	26.5948	26.6845	26.6768	26.3727	26.9485	26.478	26.7852	25.8993	26.315	26.6006	27.1165	26.2191	25.4023	26.4587	26.5882
CNDP2_HUMAN	Cytosolic non-specific dipeptidase	30.4678	30.629	30.679	30.7584	30.5704	30.385	30.7296	30.6073	30.4154	30.3389	30.6341	30.4155	30.6441	30.8047	30.7846	30.6013	30.3984	30.3981	30.8638	30.6538	30.8373	30.8788	30.8327	30.6146	30.6613	30.539	30.8192	30.894	30.5349	30.5876	30.933	30.5582	30.5247	30.9462	30.8469	30.8568	30.532	30.7002	31.0384	30.7157	30.5752	30.7785	30.6306	30.7169	30.4185	30.64	30.7087	30.7082
CNN2_HUMAN	Calponin-2	30.8471	30.8167	30.8573	30.9584	30.8639	30.5859	31.0155	30.8373	30.7089	30.5874	30.8257	30.5694	30.698	30.7422	30.7121	30.753	30.6215	30.7123	30.6029	30.755	30.6268	30.7469	30.8628	30.7619	30.6565	30.7641	30.679	30.8995	30.4121	30.6182	30.7177	30.4417	30.6612	30.7421	30.7136	30.7096	30.4986	30.6103	30.7068	30.6905	30.6643	31.0095	30.9067	30.7155	30.8112	30.6858	30.926	30.5432
CNOT1_HUMAN	CCR4-NOT transcription complex subunit 1	28.678	28.6575	28.8539	28.5905	28.6906	28.1954	28.7052	28.7692	28.7788	28.4326	28.4193	28.7138	28.7039	28.5806	28.4782	NA	28.1349	28.6632	28.5741	28.417	28.7808	28.8667	28.9893	28.6289	28.8806	28.8683	28.8811	28.4324	28.6429	28.6664	28.8339	28.3516	29.0426	28.4748	28.6245	28.6122	28.5263	28.6331	28.5228	28.8662	28.5096	28.808	28.3525	28.8	28.8473	28.4667	28.334	28.4524
CNPY2_HUMAN	Protein canopy homolog 2	31.6712	31.6617	31.7134	31.5465	31.4856	31.6321	31.6273	31.645	31.6828	31.7986	31.7521	31.492	31.6701	31.5937	31.4872	31.7223	31.5545	31.7889	31.4086	31.7015	31.623	31.3209	31.4617	31.544	31.4607	31.4349	31.3981	31.436	31.4454	31.5467	31.7432	31.3864	31.3929	31.2952	31.4002	31.5381	31.6203	31.5464	31.5742	31.4239	31.9311	31.6622	31.8643	31.5015	31.7261	31.5582	31.7289	31.6163
CNPY3_HUMAN	Protein canopy homolog 3	30.9915	31.3574	31.0014	31.0117	30.9919	31.1628	31.2808	30.9002	31.6308	31.2048	30.9579	31.1173	30.8672	31.09	31.1769	31.3739	31.0595	31.3014	30.8389	31.022	31.0837	31.2002	31.3229	31.3546	31.4026	31.3285	31.2214	31.2475	31.3449	31.3624	31.3425	31.2323	31.0965	31.0897	31.2018	31.1962	31.4579	31.4202	31.187	31.2502	31.8879	31.2919	31.613	31.5349	31.5294	31.2699	31.4453	31.4635
CO4A2_HUMAN	Collagen alpha-2(IV) chain	26.4268	NA	26.8589	26.2032	26.7695	27.0762	NA	NA	27.0163	NA	26.5476	26.9411	NA	NA	26.3239	NA	NA	NA	26.6113	NA	26.4473	25.8646	27.1269	26.7081	26.5552	26.6524	26.3159	25.8827	26.2587	26.3206	NA	NA	26.2553	NA	26.0686	NA	26.5479	26.9595	26.3714	NA	26.5409	26.2029	26.5198	26.9434	26.7473	26.5536	26.6873	NA
CO6A1_HUMAN	Collagen alpha-1(VI) chain	32.354	32.523	32.4461	32.1801	32.425	32.3204	32.3493	32.05	32.6452	32.4171	32.5745	32.4426	32.2408	32.3132	32.2621	32.5093	32.4311	32.3072	32.3999	32.1308	32.3765	32.277	32.446	32.5341	32.3523	32.3155	32.3636	32.416	32.5077	32.4436	32.5937	32.4186	32.3771	32.2665	32.2747	32.3544	32.4833	32.4226	32.3003	32.3206	32.519	32.3488	32.5657	32.5845	32.6225	32.539	32.4861	32.4547
COA7_HUMAN	Cytochrome c oxidase assembly factor 7	27.927	28.5823	28.832	28.0084	28.5783	28.3522	28.5534	28.0351	28.5284	28.9316	28.6251	28.2751	28.2684	28.2433	28.37	28.7353	28.9103	28.6149	28.2006	28.2341	28.4065	28.349	28.4554	28.3665	28.4303	28.3742	28.4906	28.5773	28.5208	28.5695	28.7627	28.3621	28.5154	28.5071	28.5552	28.3973	28.9146	28.6754	28.2968	28.5966	28.6597	28.7731	28.9512	28.734	28.9074	28.7769	28.636	28.5213
COASY_HUMAN	Bifunctional coenzyme A synthase	28.6539	28.6128	28.6191	28.841	28.4859	28.7234	28.8185	28.9591	28.5428	28.3841	29.5003	28.5983	28.4909	28.9029	28.7045	28.8975	28.3308	28.2911	28.9345	28.8472	28.7843	28.863	28.7929	28.8838	28.6368	28.6398	28.889	28.8583	28.4674	28.4932	28.7682	28.5703	28.7684	28.7596	28.7937	28.4733	28.477	28.5493	28.7949	28.6768	28.8289	28.7261	28.6463	29.0197	29.1226	28.8359	28.6802	29.0007
COF1_HUMAN	Cofilin-1	35.1736	35.2293	35.2046	35.4727	35.1481	35.0312	35.2416	35.4165	35.1331	35.2791	35.3155	35.3135	35.2237	35.3541	35.3566	35.1594	35.1816	35.2267	35.2702	35.3909	35.4289	35.5524	35.4571	35.2854	35.4259	35.3873	35.508	35.4243	35.2902	35.3626	35.3771	35.2935	35.3456	35.4918	35.596	35.4866	35.3259	35.4893	35.511	35.4602	35.4492	35.5317	35.4291	35.4783	35.2868	35.4018	35.5371	35.3016
COG1_HUMAN	Conserved oligomeric Golgi complex subunit 1	NA	26.4997	26.6759	NA	NA	NA	26.5646	NA	26.7774	26.8584	26.621	NA	NA	NA	26.2238	27.0117	26.9028	NA	26.8472	NA	NA	26.8415	NA	26.8305	NA	NA	NA	26.6803	NA	NA	26.3294	NA	NA	NA	NA	NA	NA	NA	26.8492	NA	27.3805	NA	26.6481	26.7861	26.2175	26.8778	26.1596	26.4182
COMD1_HUMAN	COMM domain-containing protein 1	26.2127	NA	25.4009	NA	26.1901	NA	25.2902	26.0464	NA	NA	NA	25.4018	25.483	NA	25.9062	NA	25.2795	25.4456	26.1295	25.4195	25.6504	NA	25.5105	NA	NA	25.6689	25.883	NA	NA	NA	25.6881	25.3795	25.7318	25.7831	26.5253	NA	25.6254	26.2971	26.4931	NA	NA	25.4618	25.7204	25.7225	NA	27.0787	25.7034	NA
COMD2_HUMAN	COMM domain-containing protein 2	25.7878	26.0291	NA	26.3916	26.6914	NA	NA	NA	NA	26.7429	NA	26.667	NA	25.998	NA	NA	NA	26.528	26.3169	NA	26.5674	26.7213	26.3964	26.8056	26.0692	26.6094	NA	26.6664	26.0522	26.7157	26.3553	NA	26.8303	26.3395	NA	NA	26.766	26.8056	26.533	26.5018	26.3667	26.578	26.5499	26.3857	26.5359	26.6895	26.2076	NA
COMD4_HUMAN	COMM domain-containing protein 4	NA	26.5221	26.1261	26.3866	26.7137	26.1937	26.4286	26.7278	27.0318	25.8935	26.0397	26.1373	26.7776	25.95	26.5346	NA	26.2305	26.3825	26.6879	26.7045	NA	27.4499	26.2578	26.6839	26.3686	26.7607	26.1889	26.6023	26.5713	25.9376	26.7165	26.5081	NA	27.2	NA	26.5641	26.3895	26.0368	26.6079	26.4024	27.5245	26.8355	26.6492	26.6264	27.1516	26.8963	26.8657	26.566
COMD9_HUMAN	COMM domain-containing protein 9	28.3505	28.5307	28.1409	28.5189	27.9445	28.1268	28.8622	28.4845	28.2253	28.5024	28.2758	28.157	28.5972	28.2602	28.6858	27.7702	28.1554	28.4576	28.3923	28.4655	28.1174	28.3132	28.4649	28.3171	28.3283	28.3748	28.2075	28.3049	28.0009	28.0072	28.0624	28.0505	28.2453	28.2693	28.0954	28.9131	27.8257	28.0114	28.2647	28.2248	28.0968	28.3109	28.4511	27.9892	28.4014	28.1665	27.9292	28.3963
COMT_HUMAN	Catechol O-methyltransferase	33.1545	32.9649	33.0849	33.1493	33.1992	33.5004	33.0215	33.243	33.3509	33.4229	33.3459	33.3726	33.1978	33.3736	32.8914	33.014	33.2048	33.2452	33.1427	33.1216	33.137	33.1243	33.1219	33.1211	33.1913	33.3695	33.0963	33.2275	33.2868	33.1346	33.213	33.2593	33.3461	32.9809	33.4446	33.1478	33.1105	33.3158	33.2814	33.2972	33.2512	32.9397	32.9459	32.8118	33.0719	33.4719	33.1434	33.0338
COPA_HUMAN	Coatomer subunit alpha	32.3275	32.3823	32.3703	32.4348	32.2905	32.1177	32.3623	32.3902	32.2701	32.1429	32.2005	32.1322	32.1172	32.2684	32.3681	32.1529	31.9649	31.9871	32.3297	32.172	32.4075	32.4305	32.4407	32.4219	32.3348	32.2197	32.2546	32.2825	32.1635	32.1791	32.1092	32.1859	32.2683	32.36	32.3117	32.2482	31.929	32.1434	32.2526	32.2865	32.2924	32.4189	32.2948	32.3378	32.0437	32.2371	32.0864	32.0891
COPB_HUMAN	Coatomer subunit beta	32.026	32.0449	32.068	32.1877	32.023	31.9029	32.0106	31.9776	31.7838	31.9425	31.9426	32.0555	31.9407	32.0498	32.0657	31.6862	31.8125	31.8357	31.9417	31.8629	32.1087	32.1712	32.1032	32.0661	32.0113	32.0435	32.1515	32.0914	31.9639	31.9528	31.9917	31.952	31.9896	32.1284	32.1085	32.061	31.8684	32.0463	32.1783	31.9709	32.0983	32.0775	32.036	31.8769	31.8672	31.9136	31.8844	31.927
COPB2_HUMAN	Coatomer subunit beta	32.0045	32.0819	32.1027	32.2467	31.9849	31.9583	32.0339	32.0122	31.7722	31.8696	31.9861	31.9026	31.8686	31.9518	32.0235	31.8193	31.7711	31.8565	32.0247	31.9493	32.0806	32.0723	32.0429	31.9424	32.082	31.9683	32.0768	31.9832	31.9359	31.9394	31.9008	31.8707	31.9883	32.0294	32.0201	31.8938	31.8137	31.8714	31.953	31.9999	32.1425	32.2823	32.1485	32.1303	32.0969	31.9579	31.8717	31.9093
COPD_HUMAN	Coatomer subunit delta	31.5475	31.735	31.6525	31.577	31.6601	31.6025	31.7773	31.5818	31.5182	31.4566	31.5897	31.4934	31.5592	31.6908	31.6288	31.3153	31.3925	31.5554	31.4877	31.5884	31.5979	31.6609	31.6488	31.7196	31.5676	31.6337	31.6049	31.6944	31.5472	31.5237	31.7371	31.5741	31.6789	31.596	31.5821	31.7078	31.5555	31.6129	31.753	31.5874	31.7362	31.6879	31.656	31.6777	31.6197	31.6205	31.7748	31.6488
COPE_HUMAN	Coatomer subunit epsilon	30.3851	30.4348	30.4833	30.4104	30.2263	30.22	30.6296	30.2232	30.1806	30.0923	30.2434	30.3631	30.4078	30.2723	30.2418	29.9187	30.077	30.3434	30.4223	30.3775	30.3442	30.3839	30.2646	30.3112	30.1136	30.232	30.2305	30.2905	30.294	30.2632	30.7874	30.3626	30.1827	30.3477	30.2353	30.3488	30.1289	30.0142	30.4084	30.3359	30.4527	30.4589	30.3889	30.3727	30.4303	30.4912	30.3525	30.5684
COPG1_HUMAN	Coatomer subunit gamma-1	32.1355	32.1807	32.1899	32.0613	32.0892	32.0002	32.1011	32.099	31.9786	31.9523	32.1316	31.9279	32.1153	32.082	32.1386	31.8748	31.8093	31.8914	32.161	31.9263	32.09	32.1882	32.0684	32.2673	32.0837	32.0945	32.1311	32.174	32.0793	31.9746	32.079	32.007	32.111	32.1985	32.2096	32.0472	31.9532	31.9893	32.1172	32.1437	32.0303	32.1686	32.1117	32.0735	32.0469	32.0983	31.8979	32.2129
COPG2_HUMAN	Coatomer subunit gamma-2	27.4621	27.1815	27.1017	27.4788	27.6077	27.2996	27.0585	27.5767	27.1695	27.5864	26.868	27.4283	27.379	27.4303	27.6241	NA	27.3882	27.3454	27.3912	27.3123	27.29	27.1005	27.1976	27.0953	27.1617	NA	27.3414	NA	26.6486	27.6308	27.4063	27.0034	26.8466	27.4719	27.4852	27.8957	27.1985	27.186	26.9235	27.2434	27.1309	27.0431	27.1061	27.3513	26.5469	27.3184	26.5115	27.4312
COPZ1_HUMAN	Coatomer subunit zeta-1	30.3478	30.5275	30.6667	30.3998	30.2569	30.3884	30.7227	30.0054	30.148	30.5118	30.3896	30.337	30.1241	30.4005	29.9362	30.1317	29.7658	30.4502	30.2722	30.2401	30.2855	30.4948	30.6394	30.4374	30.3161	30.0953	30.2926	30.4448	30.2718	30.2571	30.3744	30.242	30.1747	30.5362	30.0963	30.3915	30.1328	30.232	30.382	30.2289	30.4365	30.2321	30.2645	30.1009	30.4899	30.3832	30.3478	30.0396
COQ8A_HUMAN	Atypical kinase COQ8A, mitochondrial	27.6994	NA	27.0651	26.5398	27.1336	27.451	NA	NA	26.9398	27.0474	27.493	27.3988	27.0361	27.2794	NA	NA	NA	26.8553	27.0622	NA	27.2575	26.8832	27.0632	27.3037	26.9797	27.4589	27.368	27.2882	27.4118	27.3834	26.8534	27.8903	27.9954	27.4129	27.5131	27.743	27.6616	27.5744	27.2752	27.492	26.9836	25.9849	26.8618	NA	27.2784	27.2526	27.1878	NA
COQ9_HUMAN	Ubiquinone biosynthesis protein COQ9, mitochondrial	26.6777	26.6465	27.1447	26.706	27.413	27.3277	27.1352	26.7888	27.1358	27.3875	27.0198	27.3324	27.3708	26.6702	26.0825	NA	26.2002	26.8433	27.0526	27.0095	26.8847	27.2287	26.3701	26.9322	27.1552	27.0603	26.9705	27.1177	27.2113	27.3073	26.3722	27.4732	27.5774	27.3043	27.2779	27.029	27.0741	27.2192	26.9381	27.1398	26.6883	26.5469	26.7015	26.4356	27.0091	26.7582	26.664	NA
COR1A_HUMAN	Coronin-1A	33.6055	33.5428	33.7136	33.7124	33.5122	33.4715	33.5967	33.5268	33.2004	33.4852	33.451	33.5683	33.5318	33.6835	33.6596	33.722	33.4924	33.5159	33.5375	33.5697	33.6376	33.6973	33.7328	33.7047	33.5726	33.7133	33.5606	33.8167	33.4893	33.5962	33.7629	33.6274	33.5085	33.5971	33.7527	33.7475	33.5935	33.689	33.7436	33.6566	33.7447	33.9215	33.6511	33.6723	33.6305	33.5562	33.7457	33.5635
COR1B_HUMAN	Coronin-1B	31.1525	31.121	31.2512	31.1586	30.9809	30.7518	31.2685	30.8082	30.7975	30.9479	30.8756	31.0721	30.7807	31.2011	30.8315	30.833	30.8737	30.8709	30.9991	31.0085	30.9943	31.0788	31.1042	31.07	31.0201	31.0363	30.9993	31.0405	30.8569	31.0224	31.0031	30.9818	30.8976	31.1062	31.0673	31.3161	30.9606	31.1319	31.1258	31.0261	31.1053	31.2342	31.0737	30.9421	30.9679	30.8961	31.0598	31.0824
COR1C_HUMAN	Coronin-1C	32.5292	32.7094	32.5873	32.487	32.6277	32.6699	32.6241	32.5588	32.6336	32.7033	32.691	32.6038	32.5346	32.664	32.5695	32.7619	32.6037	32.6062	32.6323	32.5789	32.5995	32.543	32.697	32.7201	32.6572	32.825	32.6667	32.6598	32.6709	32.5621	32.68	32.5894	32.6976	32.7765	32.6104	32.6223	32.7899	32.6945	32.5632	32.6044	32.7417	32.6384	32.6253	32.6575	32.6246	32.724	32.8098	32.7198
CORO7_HUMAN	Coronin-7	30.6092	30.5912	30.9025	30.8186	30.5654	30.3792	30.6452	30.5657	30.4532	30.6325	30.7075	30.5663	30.5084	30.6734	30.6247	29.7417	30.4368	30.6905	30.8325	30.5337	30.3873	30.7459	30.5269	30.6745	30.4327	30.5867	30.659	30.7128	30.3386	30.443	30.6108	30.5475	30.4634	30.7517	30.6607	30.635	30.3206	30.6001	30.6664	30.5413	30.645	30.6309	30.6936	30.5049	30.8326	30.8335	30.6147	30.6182
COTL1_HUMAN	Coactosin-like protein	32.1023	32.0652	32.1967	32.2236	31.9414	31.8942	32.013	32.2106	31.9428	32.0099	31.9575	32.0596	32.2766	32.3078	32.4734	32.0491	32.0715	32.0903	31.9164	32.0206	32.4174	32.336	32.2758	32.3524	32.3596	32.2154	32.4794	32.6087	32.0731	32.2266	32.1129	32.3493	32.255	32.4828	32.4532	32.3821	32.2053	32.301	32.3622	32.2301	32.1431	32.2516	32.1337	32.3271	32.0738	32.1704	31.9817	32.1052
COX17_HUMAN	Cytochrome c oxidase copper chaperone	NA	27.2208	27.8284	27.7642	27.2512	NA	28.0237	27.8116	NA	NA	27.588	27.4651	27.4258	27.8184	27.493	28.0549	NA	28.0104	NA	27.8074	27.6508	27.419	27.6807	27.4547	27.5776	27.7586	27.7127	27.9986	27.8918	28.1433	27.3422	27.5728	27.4696	27.5175	27.5851	27.7365	28.3001	28.0008	27.7554	27.8367	27.4065	27.5982	27.7648	27.5799	27.7607	27.7326	28.267	28.1788
COX2_HUMAN	Cytochrome c oxidase subunit 2	29.4081	28.8671	29.5013	29.1927	29.4196	29.705	29.2857	29.3497	29.569	29.5194	29.6362	29.5671	29.0188	29.7205	29.1308	29.1636	29.2323	29.0256	29.0226	29.1122	29.4554	29.265	29.2445	29.6317	29.4316	28.9005	28.743	29.211	29.0606	28.8515	29.0504	29.2529	29.7347	29.064	29.1277	29.2884	29.1933	28.842	29.0375	29.068	29.5801	29.6634	28.9665	29.0872	29.426	29.389	29.2797	29.3076
COX41_HUMAN	Cytochrome c oxidase subunit 4 isoform 1, mitochondrial	29.7937	29.297	29.8497	29.6072	29.9635	30.2926	29.7712	29.7754	29.8709	29.9513	30.0766	29.8776	29.7888	29.9781	29.7292	29.8231	29.8199	29.9217	29.8976	29.9863	30.0678	29.8446	29.5795	30.0407	29.9296	30.1148	29.8784	29.8432	30.0321	30.1229	30.4753	30.2489	30.3631	30.0227	30.2342	30.072	30.0587	30.0621	30.1386	29.8195	30.4192	29.7801	29.6306	29.622	30.3232	30.256	30.3676	30.2093
COX5A_HUMAN	Cytochrome c oxidase subunit 5A, mitochondrial	30.5733	30.295	30.6935	30.4249	30.687	30.9272	30.5223	30.62	30.8166	30.8183	30.8878	30.7659	30.6708	30.8953	30.5394	30.6069	30.818	30.7283	30.6438	30.3928	31.0746	30.5234	30.3619	30.5265	30.7753	30.845	30.553	30.0262	30.8632	30.55	30.995	30.9466	30.8578	30.5929	31.1012	30.6783	30.9986	30.7223	30.7952	30.6176	30.5507	30.571	30.3047	30.3	30.8794	30.975	30.9298	30.7191
COX5B_HUMAN	Cytochrome c oxidase subunit 5B, mitochondrial	29.0155	29.0217	28.9451	28.8415	29.4469	29.7223	29.1487	29.1951	29.181	29.4275	29.5017	28.9435	29.2421	29.598	28.7394	29.61	29.3528	29.5079	29.4513	29.2236	29.9259	29.575	27.7197	29.679	29.4825	29.5417	28.1088	27.6251	29.6695	29.8781	29.8259	29.6384	29.9311	30.0057	29.9397	29.8281	29.9624	29.174	29.6496	30.1957	29.2903	29.4055	29.1541	29.2902	29.5912	29.7782	29.784	29.2091
COX6C_HUMAN	Cytochrome c oxidase subunit 6C	28.033	27.8107	28.3065	27.9031	28.2335	28.4711	27.6462	28.3441	28.222	28.3283	28.2281	28.1236	NA	28.0534	28.3113	28.354	27.7569	28.0905	28.4067	28.254	28.3008	28.1233	28.0255	28.1865	28.4401	28.5654	28.1673	28.1581	28.3454	28.4888	28.3641	28.6051	28.7945	27.9259	28.5372	28.1781	28.3344	27.9917	28.1742	28.3671	28.2459	27.9596	27.8096	27.7207	28.4725	28.2317	28.3187	28.2382
CP062_HUMAN	UPF0505 protein C16orf62	27.0512	26.5028	26.9459	27.0547	26.8602	26.6031	26.1468	27.1932	26.5737	26.6435	26.5556	26.8662	26.9942	26.3631	27.0459	NA	26.6292	26.5454	26.9319	26.791	27.0733	26.9556	26.6534	26.6344	27.9207	26.7759	26.8127	26.7627	26.7557	27.8971	NA	26.6513	26.9633	27.2035	26.9579	26.8915	26.3632	26.6302	27.0441	27.2992	26.6227	27.0572	26.7826	27.6241	26.1864	28.0924	26.6119	27.3749
CP2S1_HUMAN	Cytochrome P450 2S1	NA	27.1298	27.2944	26.8716	27.4758	NA	27.4893	NA	NA	27.208	27.5523	NA	27.028	27.8369	27.1528	NA	NA	27.3725	27.3929	27.0824	27.3427	27.301	27.1967	27.5338	27.3804	27.5081	26.6991	27.3192	27.1902	27.0684	27.3504	27.4961	27.1928	27.1652	27.3824	27.4266	27.2396	27.3388	27.3786	27.4168	27.4217	27.0736	27.1628	26.9241	27.9769	27.7516	27.4596	NA
CP7B1_HUMAN	25-hydroxycholesterol 7-alpha-hydroxylase	25.6304	25.6115	26.0262	25.8115	26.223	26.1118	26.2007	26.9068	26.192	26.0624	26.0678	26.0089	26.3836	26.7387	26.0935	NA	26.1077	25.6098	26.2086	25.9032	26.0878	NA	NA	25.9925	25.8808	26.2434	25.5082	NA	25.8346	25.3571	26.0604	25.9647	26.1315	NA	26.1628	25.8129	NA	26.0133	NA	25.8856	25.7446	25.6627	25.5072	25.5787	NA	25.7919	25.3248	25.7557
CPIN1_HUMAN	Anamorsin	27.9426	27.8225	27.8385	27.9602	27.5393	27.2947	27.3979	27.9789	27.2696	27.9278	27.5404	27.4255	NA	27.8295	27.6734	28.0417	NA	27.5116	27.7945	27.6926	27.6226	27.6617	27.6306	27.967	27.8135	27.5816	27.4284	28.3305	27.8551	27.444	27.5916	27.9304	27.15	28.059	27.8005	27.2621	27.0635	28.0107	28.1327	27.9081	27.5171	27.522	27.8648	27.8775	27.9627	28.2769	27.7309	27.8714
CPNE1_HUMAN	Copine-1	30.3209	30.2091	30.2658	30.3502	30.1267	30.0202	30.4337	30.5251	29.9816	30.0883	30.006	30.1024	30.1847	30.3679	30.8086	29.8966	29.9609	29.9334	30.4045	30.0696	30.3122	30.4431	30.4557	30.4408	30.209	30.3412	30.4819	30.2968	30.2902	30.1666	30.4204	30.4187	30.2143	30.5295	30.5873	30.5202	29.9871	30.2092	30.5119	30.5223	30.3128	30.2416	30.0422	30.1806	30.0185	30.2852	30.2383	30.4343
CPNE2_HUMAN	Copine-2	29.6545	29.5762	29.8102	29.5081	29.667	29.4755	30.0264	29.4715	29.4475	29.3724	29.4121	29.4154	29.3066	29.5909	29.3904	28.7013	29.4123	29.4438	29.4268	29.4133	29.2807	29.4668	29.7787	29.785	29.3994	29.6778	29.4725	29.5393	29.2144	29.329	29.4855	29.389	29.5973	29.5331	29.6193	29.8362	29.3633	29.2089	29.4556	29.397	29.3866	29.5623	29.3191	29.4458	29.7143	29.6541	29.5923	28.618
CPNE3_HUMAN	Copine-3	28.8041	28.5953	28.6601	28.5992	28.5813	28.0451	28.6321	28.3856	28.3419	28.6334	28.7121	28.623	28.3442	28.6307	28.2942	28.4736	28.7501	28.3309	28.5776	28.425	28.8591	28.8859	28.7826	28.5631	28.639	28.7061	28.61	28.7941	28.3434	28.7008	27.8986	28.8006	28.8511	29.0039	28.812	28.7009	28.6179	28.4825	28.8276	28.7834	27.9773	28.9053	28.8371	28.5866	28.1715	28.4999	28.5795	28.2087
CPNS1_HUMAN	Calpain small subunit 1	30.3188	30.3546	30.5609	30.4388	30.2708	30.338	30.5544	30.6051	30.2895	30.3496	30.1695	30.3318	30.2729	30.4887	30.4771	30.2517	30.3684	30.3389	30.4719	30.4483	30.2108	30.4592	30.357	30.4966	30.1661	30.438	30.509	30.4863	30.2891	30.1155	30.5693	30.3025	30.1904	30.4346	30.1904	30.4996	30.141	30.246	30.4548	30.1731	30.6314	30.5879	30.5596	30.4098	30.2574	30.5776	30.4443	30.6216
CPPED_HUMAN	Serine/threonine-protein phosphatase CPPED1	28.1849	27.9411	28.1506	27.932	28.2214	28.3678	28.0272	28.0029	27.7745	27.9796	27.9785	27.6846	28.0466	27.8485	28.0535	27.6836	27.7233	27.9798	28.0648	28.2327	26.9195	28.23	28.0773	28.3428	27.9234	28.0499	28.1352	28.1268	27.5505	28.0487	27.9944	28.0462	28.026	28.0902	28.2394	28.1059	NA	27.8469	27.975	27.9169	28.2641	28.2109	28.0037	28.0103	27.9652	28.0648	28.1437	NA
CPSF1_HUMAN	Cleavage and polyadenylation specificity factor subunit 1	29.5609	29.604	29.6475	29.3993	29.7694	29.4586	29.5777	28.9803	29.9258	29.7191	29.4708	29.7786	29.6818	29.5701	29.3413	29.4305	29.6406	29.7012	29.4101	29.2178	29.717	29.6547	29.8778	29.8065	29.8612	29.7688	29.6151	29.7719	29.6566	29.7845	29.7318	29.7703	29.7651	29.599	29.5393	29.5162	29.9883	29.6599	29.5095	29.7426	29.6	29.6929	29.8933	29.5735	29.7001	29.6808	29.4772	29.236
CPSF2_HUMAN	Cleavage and polyadenylation specificity factor subunit 2	29.3199	28.9997	28.955	29.1563	29.1303	29.5091	28.5352	29.169	29.2439	29.2999	28.9164	29.4275	29.3057	28.5007	29.5359	29.0163	29.3089	29.3239	29.0339	29.1373	29.2717	29.2191	29.493	29.0402	28.9654	29.2225	29.2658	29.0624	29.2633	29.3188	29.3551	29.2538	29.3523	29.2734	29.0838	29.0709	29.3079	29.4124	28.8214	29.2196	28.6122	28.8402	28.9649	29.3596	29.0884	29.1092	28.6853	28.8826
CPSF3_HUMAN	Cleavage and polyadenylation specificity factor subunit 3	29.1816	29.3768	29.6488	29.1499	29.2828	29.3871	29.5297	29.2528	29.3704	29.4693	29.4935	29.0922	29.3221	29.4075	29.2685	29.3387	29.2	29.1122	29.312	29.061	29.1358	29.2418	29.5355	29.3819	29.4545	29.2964	29.263	29.438	29.3531	29.1992	29.4379	29.4361	29.4714	29.2402	29.1737	29.1854	29.447	29.2091	29.2342	29.4314	29.5818	29.2832	29.4325	29.1338	29.1813	29.3512	29.2738	29.0222
CPSF5_HUMAN	Cleavage and polyadenylation specificity factor subunit 5	31.2435	31.2827	31.252	31.0679	31.1402	31.1837	31.2215	31.0855	31.5018	31.1702	31.0494	31.291	31.1404	31.2483	31.413	31.4748	31.437	31.3289	31.0054	31.2366	31.3898	31.2019	31.3129	31.2482	31.5054	31.3821	31.3515	31.5256	31.5949	31.4429	31.4834	31.3283	31.2826	31.3724	31.189	31.2201	31.7045	31.4591	31.3589	31.3761	31.2381	31.3701	31.4163	31.6179	31.3513	31.4717	31.3632	30.9937
CPSF6_HUMAN	Cleavage and polyadenylation specificity factor subunit 6	31.0216	31.2904	31.3902	30.892	31.0004	31.1906	31.54	31.1366	31.4218	31.2775	31.0413	30.848	30.895	31.4826	31.0347	30.9959	31.0823	31.237	31.4054	30.9564	30.8283	30.6503	31.0588	30.9606	31.1168	30.9788	30.9339	31.0727	30.9249	31.0424	31.194	30.9081	30.9378	31.022	30.9473	30.86	31.3615	30.9501	30.85	30.8629	31.0162	30.8886	31.3128	31.497	31.1027	31.6865	31.1025	31.2305
CPSF7_HUMAN	Cleavage and polyadenylation specificity factor subunit 7	29.7752	29.8496	29.9959	29.6899	29.7106	29.81	29.5153	29.6466	29.7029	29.7376	29.8261	29.579	30.1475	29.6	29.8642	29.7885	29.7341	29.7042	29.7767	29.4636	30.0706	29.8471	30.2555	30.0508	30.2333	30.1478	29.853	30.1049	30.0251	30.0887	30.2359	30.0652	29.6651	29.9963	30.0464	29.8884	30.235	29.9654	29.8778	29.8973	29.8668	29.9038	30.0452	30.0598	30.0448	30.1353	29.7852	30.0161
CPT1A_HUMAN	Carnitine O-palmitoyltransferase 1, liver isoform	29.9403	29.7404	30.0377	29.7206	30.1059	30.3485	29.9002	30.135	29.9885	30.0702	30.2024	30.0607	30.0637	30.0065	29.7968	30.1823	29.9397	30.2404	30.0107	30.0123	30.0531	29.9067	29.7834	29.9225	30.0488	30.1418	29.8148	30.0532	30.0364	30.0624	30.089	30.2094	30.1836	29.7577	30.0198	29.8425	29.9475	29.9633	29.8413	29.9375	30.2565	30.0309	29.8368	29.91	30.3461	30.4742	30.2751	30.0682
CPT2_HUMAN	Carnitine O-palmitoyltransferase 2, mitochondrial	31.2133	30.8593	31.3314	31.0483	31.3057	31.6802	31.1801	31.2501	31.471	31.3852	31.5254	31.4205	31.3805	31.448	31.1849	31.4507	31.4733	31.3669	31.2575	31.1747	31.3563	31.13	30.8782	31.2381	31.392	31.3933	31.1177	31.2532	31.4436	31.3546	31.5836	31.5712	31.4123	31.1664	31.3505	31.2533	31.4509	31.3461	31.2935	31.3697	31.5504	31.1383	31.0651	31.0413	31.4966	31.5846	31.5339	31.5202
CPVL_HUMAN	Probable serine carboxypeptidase CPVL	26.497	26.8959	26.08	26.6926	26.7199	26.6839	26.5884	26.2518	27.2516	26.3829	26.1574	26.7093	26.7479	26.226	26.8797	NA	26.6831	26.3401	27.0456	26.9058	26.8094	27.0852	26.712	26.9243	27.1666	26.7856	26.3003	26.5664	27.4375	27.2634	NA	26.6911	27.3254	26.9783	26.7694	27.4045	27.0895	26.1268	26.6716	28.7712	26.5557	26.413	27.1974	26.6748	26.6962	26.3373	26.4668	NA
CREL2_HUMAN	Cysteine-rich with EGF-like domain protein 2	28.4823	28.8612	28.7285	28.8248	28.5896	28.8568	28.827	28.4023	28.992	28.716	29.1805	28.6621	28.4129	28.8757	28.5247	29.271	28.8368	29.1173	28.6144	28.9372	28.3869	28.4138	28.4097	28.409	28.0916	28.1178	28.6668	28.4136	28.4088	28.2389	28.4126	28.1828	28.0589	28.0293	28.0925	28.1939	28.8131	28.7025	28.3599	28.5277	28.9149	28.8636	28.8462	28.5816	28.626	28.4393	28.9513	28.6901
CRK_HUMAN	Adapter molecule crk	26.3164	NA	26.1158	26.2927	NA	NA	26.5277	26.3703	NA	25.8283	26.6566	NA	NA	NA	NA	NA	NA	NA	26.3069	26.6963	25.8601	26.1647	26.2266	26.2602	25.8663	25.9986	26.2613	26.5382	26.4843	25.8127	26.5508	NA	NA	26.3199	26.4579	NA	NA	NA	26.4432	26.3869	26.0765	NA	26.2414	26.0325	26.0503	26.2666	NA	26.3203
CRKL_HUMAN	Crk-like protein	28.4849	28.2901	28.3091	28.403	28.5517	28.0858	28.2428	28.6977	28.4644	28.485	28.3813	28.4709	28.3083	28.3323	28.6372	NA	28.4981	28.4487	28.641	28.5329	28.6688	28.7638	28.5896	28.5368	28.6374	28.5011	28.4878	28.3226	28.5342	28.4169	28.1791	28.4109	28.2838	28.9686	28.8303	28.7685	28.5462	28.6259	28.7196	28.8281	28.1878	28.6308	28.3218	28.606	28.3346	28.2351	28.549	28.0861
CRTAP_HUMAN	Cartilage-associated protein	30.0927	30.2205	30.2502	30.0688	30.2905	30.1432	30.3404	30.1663	30.1161	30.2344	30.0826	30.2023	30.0351	29.9837	30.0068	30.1076	30.0823	30.1617	30.1386	30.1547	30.1104	30.088	30.3919	30.3474	30.3686	30.1225	30.2506	30.0432	30.2365	30.1701	30.3093	29.9879	30.1128	30.2326	29.8756	29.9333	30.1473	30.1075	29.9805	30.0465	30.0948	30.0503	30.3503	30.1739	30.1146	30.0377	30.028	29.1194
CSDE1_HUMAN	Cold shock domain-containing protein E1	30.4176	30.5681	30.5984	30.5112	30.2944	30.3114	30.4421	30.1847	30.1948	30.4245	30.3382	30.2182	30.3735	30.3298	30.4392	30.6263	30.0833	30.3145	30.3686	30.4523	30.2824	30.3734	30.2978	30.2909	30.2813	30.3735	30.3637	30.4799	30.4481	30.3144	30.5194	30.2163	30.2565	30.4125	30.3548	30.3859	30.2957	30.33	30.4974	30.3298	30.4125	30.5739	30.622	30.4039	30.5935	30.5601	30.6083	30.496
CSF1R_HUMAN	Macrophage colony-stimulating factor 1 receptor	28.2918	28.3792	28.5538	28.2059	28.1523	28.8113	28.8451	28.4637	28.3992	28.3441	28.3183	28.1576	29.0765	28.586	28.3921	28.5298	28.5424	28.0739	28.6875	28.1718	28.865	28.7291	28.7572	29.0107	28.6006	28.4638	28.4377	28.5234	28.4448	28.333	28.0613	28.5163	28.923	28.8019	28.3394	28.8851	28.7472	28.494	28.8277	28.7985	28.4704	28.3581	28.3292	28.2984	27.7373	28.0049	28.2494	27.6838
CSK_HUMAN	Tyrosine-protein kinase CSK	29.1822	28.9781	29.0087	29.2933	28.9268	29.1024	28.9848	29.5687	28.5596	28.9841	29.0472	28.9592	29.2545	28.5232	29.1739	28.7317	29.0082	28.8534	28.9668	28.9805	29.0449	29.3657	29.2516	28.9334	28.9284	28.9968	29.0268	29.0228	28.9882	28.9719	28.9018	28.8367	29.1128	29.1898	29.1634	29.194	28.8167	28.861	29.0326	29.0786	28.7475	29.0291	28.8925	29.043	28.6825	28.8233	28.794	29.2426
CSK21_HUMAN	Casein kinase II subunit alpha;Casein kinase II subunit alpha 3	29.5755	29.7496	29.6667	29.5565	29.6325	29.8428	29.7702	29.8548	29.681	29.5958	29.6658	29.8131	29.7364	29.484	29.6896	29.441	29.444	29.8763	29.9464	29.7265	29.7359	29.5549	29.591	29.7935	29.4887	29.422	29.7157	29.7846	29.6153	29.5757	30.1095	29.8065	29.7697	29.7767	29.5858	29.866	29.7351	29.367	29.5221	29.5447	29.5909	29.7122	29.6155	29.6463	29.882	29.7481	29.7699	29.9084
CSK22_HUMAN	Casein kinase II subunit alpha	28.6183	28.883	28.782	28.4713	28.9981	28.5802	29.0575	28.2965	28.8655	28.6917	28.7947	28.7832	28.4454	28.7299	28.6004	NA	28.1632	28.5434	28.9966	28.4977	28.7691	28.8535	28.9687	28.6686	28.9028	28.7548	28.8268	28.6867	28.7276	29.1479	28.8016	28.6997	28.9794	28.9964	28.7193	28.7434	28.8607	28.8123	28.5198	28.6811	28.5408	28.5965	28.5276	29.0022	28.798	28.9518	28.6404	29.02
CSK2B_HUMAN	Casein kinase II subunit beta	28.3907	28.5877	28.729	28.3886	28.2368	28.6817	28.7898	28.0546	28.8363	28.6515	29.1408	28.5984	28.423	28.6589	28.6362	29.048	28.8539	28.6611	28.6209	28.6093	27.8433	28.1099	28.4173	28.6079	28.4435	28.0439	28.169	28.4961	27.7821	28.6713	28.962	NA	28.5122	28.1981	28.3729	28.3848	28.4819	28.3657	28.4461	28.3482	28.2377	28.4866	28.4164	28.8388	28.8032	28.9278	29.0299	28.4959
CSN1_HUMAN	COP9 signalosome complex subunit 1	28.2193	28.3385	28.1566	27.9989	28.0531	28.1477	27.8923	28.148	28.1197	27.7643	27.8469	27.8737	27.8177	27.9482	27.8338	28.1032	27.7831	27.9823	27.9897	28.1489	28.2771	28.1714	28.3647	28.2863	28.2748	28.0736	28.0415	28.1369	27.8745	27.7875	28.0659	28.1927	28.1473	28.4394	27.9457	28.1411	28.1637	28.0923	28.4265	28.4056	27.7758	28.1962	28.3127	28.651	27.8257	28.0587	27.7242	27.579
CSN2_HUMAN	COP9 signalosome complex subunit 2	29.4644	29.248	29.5453	29.4651	29.519	29.4457	29.2479	29.3026	29.3891	29.3386	29.0803	29.5276	29.4714	29.1408	29.3335	29.0357	29.2804	29.0685	29.338	29.5951	29.6967	29.6633	29.7179	29.7697	29.5902	29.4471	29.4587	29.4405	29.4894	29.6596	29.3407	29.589	29.6638	29.7376	29.5073	29.6494	29.3839	29.5671	29.6239	29.6006	28.6406	28.9787	29.2178	29.4468	28.8603	29.1033	28.9001	29.1076
CSN3_HUMAN	COP9 signalosome complex subunit 3	28.9116	29.2105	28.8989	28.816	29.0001	28.9886	29.028	28.6514	28.7441	28.8112	28.883	28.5468	28.8431	28.7268	28.865	28.9252	28.819	28.6003	29.4548	28.8597	28.7852	28.7497	28.8297	28.7805	28.6704	28.8258	28.8477	28.8758	28.4891	28.4677	28.6006	28.6491	28.5926	28.8018	28.5587	28.9292	28.664	28.844	28.9205	28.6732	28.8379	28.835	29.4197	28.734	28.6812	28.9877	28.9568	28.9056
CSN4_HUMAN	COP9 signalosome complex subunit 4	29.3742	29.3375	29.4184	29.263	29.3062	28.9226	29.258	28.9616	29.1752	28.9885	29.0566	29.1794	29.2622	29.1776	28.9078	28.944	29.0383	28.9041	29.2488	28.8403	29.1566	29.1642	28.9834	29.0363	29.0529	28.9491	28.8754	29.1451	29.0992	28.9623	29.1438	29.1378	28.7333	28.947	28.8852	28.9558	29.02	28.8787	29.081	28.9218	29.0057	29.1318	29.1956	29.2083	28.9799	29.0717	29.1455	28.6691
CSN5_HUMAN	COP9 signalosome complex subunit 5	28.1656	27.7652	27.9493	27.7266	27.7033	27.5373	27.7685	27.7233	27.7195	27.5133	27.5522	27.639	27.752	27.3809	27.5131	NA	NA	27.3786	27.5229	27.5698	28.019	27.7946	27.9692	27.8058	27.6923	27.8247	27.9287	27.9259	27.424	27.7092	27.9071	27.9946	27.9842	27.753	27.4705	27.9515	27.6423	27.6658	27.6834	27.7068	27.2074	27.7165	27.8367	27.6777	27.3541	27.617	27.6691	26.8369
CSN6_HUMAN	COP9 signalosome complex subunit 6	28.2512	28.5575	28.7249	28.4249	28.2262	28.0914	29.0487	28.6825	28.746	28.2438	28.341	28.6537	28.34	28.5899	28.2333	NA	28.8203	28.5432	28.4532	28.5723	28.565	28.4387	28.78	28.7098	28.8762	28.2895	28.637	28.6231	28.6433	28.5942	28.813	28.7053	28.7266	28.6523	28.5862	28.7448	28.5821	28.4519	28.419	28.2289	28.7803	28.569	28.8726	28.4874	28.6876	28.5128	28.5497	29.1408
CSN7A_HUMAN	COP9 signalosome complex subunit 7a	25.4126	25.4821	24.9502	25.8033	25.3351	24.9889	25.077	25.171	25.1853	25.5198	24.4651	25.4087	25.5414	25.5308	25.9185	25.2591	25.3499	NA	25.4507	25.3916	25.7131	25.8151	25.6314	25.4848	25.8529	25.0767	25.4631	25.1466	25.6169	25.4607	25.0276	25.6354	25.5205	26.0662	NA	25.5727	25.1468	25.6135	25.5618	25.8357	24.5593	25.4225	25.2193	24.9962	24.2938	24.8004	24.5009	NA
CSN7B_HUMAN	COP9 signalosome complex subunit 7b	27.6232	27.7713	27.681	27.8833	27.5785	27.572	27.8722	27.559	27.5649	27.6499	27.3983	27.5816	28.1599	27.4066	27.6604	27.2804	27.7998	27.9233	27.7689	28.0317	27.4782	27.5503	27.6947	27.6688	27.6496	27.5733	27.2023	27.7341	27.6017	27.9052	27.4105	27.2031	27.4644	27.5805	27.6738	27.7084	27.4939	27.493	27.8772	27.5322	27.5598	27.6213	27.5623	27.4734	28.0096	28.0727	27.1458	27.5643
CSRP1_HUMAN	Cysteine and glycine-rich protein 1	30.7714	30.7083	30.991	30.9532	30.9578	30.5898	30.7647	30.596	30.3029	30.6676	30.8922	30.6192	30.7209	30.9141	30.8913	30.859	30.678	30.763	30.9287	31.1011	30.6432	30.7559	30.662	30.7278	30.6196	30.7171	30.9604	31.047	30.8364	30.8599	30.8689	30.7971	30.6303	30.8761	30.8948	30.8737	30.7948	30.7913	30.8398	30.7354	30.9238	31.1762	31.1361	31.0693	31.2673	31.203	31.4384	31.2869
CSTF1_HUMAN	Cleavage stimulation factor subunit 1	29.3148	29.6395	29.1731	29.0363	29.3716	29.6076	29.3469	29.499	29.7745	29.6261	29.1153	29.4352	29.6627	29.2358	29.4601	29.4874	29.4542	29.4422	29.4603	29.4174	29.4051	29.2386	29.4234	29.5338	29.4307	29.4225	29.3439	29.4405	29.4472	29.5254	29.5711	29.5952	29.3078	29.4215	29.438	29.3616	29.4798	29.362	29.2574	29.4534	29.8921	29.5855	29.6697	29.5184	29.7566	29.793	29.4726	29.4016
CSTF2_HUMAN	Cleavage stimulation factor subunit 2	29.8596	29.6469	29.9421	29.6053	29.8333	29.9044	29.6469	29.6134	29.8759	29.7412	29.7155	29.6105	29.7752	29.5795	29.9684	29.5281	29.8335	29.7239	29.7427	29.6757	29.67	29.668	29.8097	29.9081	30.051	29.8217	29.7341	29.9524	30.0065	29.9756	30.0827	29.8879	29.5741	29.8081	29.5743	29.8588	30.1276	29.9048	29.8341	29.7362	29.8722	29.8131	30.0762	30.161	30.2392	30.14	30.0859	29.825
CSTF3_HUMAN	Cleavage stimulation factor subunit 3	28.9852	28.9424	29.0375	28.9557	29.1211	29.0703	29.6353	29.2239	29.6308	29.003	28.7361	29.0112	29.0726	28.7712	29.1117	28.5057	29.0911	28.8057	29.0774	28.8504	28.6865	28.4317	28.524	29.0281	28.6527	28.9252	28.8071	28.8537	28.988	28.6802	29.011	28.953	28.8436	29.1905	28.6252	28.5616	29.11	28.7896	28.8834	28.8259	28.8282	28.7957	29.117	28.8385	29.0821	29.2743	28.8622	28.9714
CTBL1_HUMAN	Beta-catenin-like protein 1	28.5826	28.7187	28.9274	28.4767	28.7518	28.6866	29.1163	28.8596	28.7958	28.6953	28.4942	28.6443	28.4905	28.8123	28.3959	28.5235	28.4716	28.7569	28.688	28.5861	28.7734	29.0171	28.8068	28.9563	28.8056	28.5016	28.526	28.6587	28.6796	28.6487	28.8376	28.7653	28.7914	28.6291	28.7851	28.57	29.0409	28.8177	28.7603	28.9182	28.4913	28.4841	28.6014	28.5368	28.6205	28.5508	28.5937	28.6061
CTBP1_HUMAN	C-terminal-binding protein 1	30.2921	30.2877	30.3849	30.2476	29.9875	30.0313	30.0469	30.0466	30.1732	30.161	30.1801	30.049	30.2297	30.248	30.26	30.4328	30.2987	30.1363	30.0592	30.0879	30.1721	30.0813	30.4695	30.4706	30.3691	30.1783	30.15	30.3768	30.2829	30.1756	30.3226	30.3089	30.037	30.1414	30.0974	30.1257	30.3668	30.2235	30.2889	30.3928	30.2125	30.157	30.4106	30.1004	30.4194	30.0513	30.186	30.044
CTBP2_HUMAN	C-terminal-binding protein 2	26.8731	26.9426	27.2	27.1944	NA	26.554	NA	26.8978	27.2334	26.7091	NA	NA	NA	NA	NA	NA	27.3363	NA	NA	NA	27.0486	26.9641	27.0628	26.8184	27.0147	26.8242	NA	27.0743	27.0803	NA	NA	26.7259	26.8495	26.8206	26.7119	NA	26.7808	26.6963	26.7423	26.6237	26.7551	26.7401	27.0835	27.3039	26.4449	27.2461	26.8121	27.0102
CTCF_HUMAN	Transcriptional repressor CTCF	25.4366	NA	25.5429	NA	25.9971	25.7616	NA	27.7048	27.3328	NA	26.6905	27.7925	26.7252	NA	NA	26.963	28.7887	28.0832	26.2546	NA	24.9481	24.7796	24.6048	24.9152	25.9443	26.1918	26.2036	26.0911	26.2899	26.0746	25.2277	25.623	26.3174	25.0163	26.3031	25.3268	26.7428	26.2614	25.887	25.7444	26.3753	26.6733	25.8227	25.1901	26.9064	26.0919	27.3359	27.9251
CTNA1_HUMAN	Catenin alpha-1	28.1587	28.0518	27.7902	27.7029	NA	27.9425	NA	27.9048	27.2899	28.0941	27.8443	28.0844	27.8066	28.1074	28.3491	27.2956	NA	NA	28.1102	28.2225	26.7036	27.4553	28.0796	27.0693	27.6984	27.5234	27.8034	27.6711	28.0239	27.6342	28.0393	27.6427	27.223	27.5625	27.3295	27.7058	27.538	27.9303	27.7487	27.3217	28.4689	27.7521	28.327	27.7417	28.22	28.2381	27.9126	28.4466
CTNB1_HUMAN	Catenin beta-1	26.5039	26.5348	26.8251	26.8274	27.053	NA	27.0238	27.1761	27.5745	26.5823	27.1919	26.7447	26.6055	26.5578	27.7133	NA	26.774	26.7903	27.4921	26.4751	26.4561	26.9507	26.6614	26.6738	26.8527	27.3642	26.6508	NA	27.08	26.8582	NA	26.7222	27.1911	26.9892	25.9682	27.1175	26.7563	NA	NA	26.7509	27.2274	26.4326	26.732	26.6348	27.7418	26.6767	26.9757	26.6436
CTND1_HUMAN	Catenin delta-1	28.9902	29.0144	28.9688	28.6205	28.9509	28.8875	28.9042	29.1775	28.9351	28.5999	28.8526	28.7616	29.1321	29.4939	28.7155	29.1454	29.0873	28.8278	28.7374	28.7114	28.8469	29.1621	28.8654	29.3715	29.0023	29.1242	29.1141	29.3235	28.9996	28.6003	29.1874	29.0015	28.58	29.077	29.6099	29.1207	28.9528	28.9164	28.8898	28.9094	28.9746	28.7189	29.1122	28.6395	29.0514	29.1228	29.2317	29.0015
CTR9_HUMAN	RNA polymerase-associated protein CTR9 homolog	28.7247	28.6913	28.7244	28.4103	28.4888	28.9685	28.5632	28.7806	28.9555	28.6103	28.6409	28.5649	28.8653	28.7793	28.7801	28.5835	28.5482	28.8845	28.2584	28.4302	28.6901	28.5766	28.9127	28.9393	29.0145	28.9297	28.6827	29.0528	28.767	28.8921	29.0257	29.077	28.895	28.7804	28.8736	28.5347	29.1467	28.9768	28.8215	28.8786	28.3961	28.8668	28.5892	28.5122	28.2827	28.747	28.7018	28.581
CTSL2_HUMAN	CTD small phosphatase-like protein 2	26.5725	27.1818	26.6108	26.5598	27.1239	NA	NA	26.872	26.7432	NA	27.7054	26.8798	NA	26.5058	NA	26.5263	NA	NA	27.1783	NA	26.411	26.2724	26.5789	26.5726	26.506	26.5953	NA	26.6256	26.1611	26.6581	27.3268	26.4253	26.4258	26.4991	26.3693	26.4944	26.5856	26.436	26.4327	27.0403	NA	26.0222	25.0655	26.3468	NA	26.312	26.4434	NA
CUL1_HUMAN	Cullin-1	28.2526	27.5466	27.2172	27.756	27.3784	27.2316	27.535	27.5125	27.4121	27.2303	27.5416	27.44	27.219	27.5884	27.5208	NA	27.4876	27.515	27.1863	27.3308	27.8453	27.5675	27.3844	27.4341	27.6548	27.6647	27.1441	27.6964	27.1285	27.3527	26.9446	27.8104	27.8997	27.8376	27.4105	27.2247	27.1357	27.3011	27.4885	27.3337	27.5329	27.8235	27.4164	27.8192	27.9382	27.502	27.916	26.7674
CUL2_HUMAN	Cullin-2	28.2947	28.346	28.2662	28.4395	28.6356	28.267	28.3979	28.2593	28.8451	28.2471	28.8894	28.0749	28.962	28.3201	28.4574	NA	28.4265	28.2947	28.4126	28.3928	28.7148	28.4805	28.5696	28.7078	28.4284	28.3829	28.4217	28.4938	28.1061	28.3135	28.0347	28.5251	28.3713	28.6107	28.6204	28.6285	28.2945	28.4485	28.6671	28.3979	28.1405	28.4499	28.2349	28.2733	27.8475	28.1666	28.3534	28.2512
CUL3_HUMAN	Cullin-3	27.7058	27.556	27.4221	27.6418	27.4604	NA	27.9109	NA	27.5379	NA	NA	27.1436	27.5459	27.6279	27.6132	NA	NA	26.4336	27.7703	27.4106	NA	27.5384	27.562	27.2311	28.0343	NA	27.537	27.6249	27.638	27.1857	27.6473	27.8409	NA	NA	27.7034	NA	27.2547	27.6471	27.2673	27.9985	27.8353	27.667	27.2646	27.6711	27.1554	27.539	27.2216	NA
CUL4A_HUMAN	Cullin-4A	27.9509	27.9532	27.3814	27.915	27.6226	27.9545	27.616	27.9055	27.7473	28.1592	27.9494	28.0113	27.9033	27.9151	28.1816	NA	27.79	27.7586	27.5835	27.9842	27.8757	27.7343	27.7447	27.4703	27.7231	27.8968	27.5608	27.5427	27.3733	27.6094	27.392	27.4748	27.3179	27.794	27.5124	27.5099	27.8178	27.4636	27.6526	27.4261	27.7669	28.3161	27.4456	27.4387	27.3751	26.9845	27.4126	27.1517
CUL4B_HUMAN	Cullin-4B	28.2736	28.2567	28.1359	28.2796	28.1857	28.3426	28.1059	28.3306	28.5636	27.9992	27.8544	28.126	28.3602	27.8259	28.3645	28.111	28.1504	28.1089	28.1135	28.2425	28.5097	28.452	28.4719	28.4264	28.2379	28.2467	28.3284	28.3067	28.0811	28.2502	28.2322	28.1842	28.3706	28.1254	28.1557	28.0909	27.9914	28.0784	28.0169	28.061	28.328	27.613	28.0107	28.3221	27.6707	28.1244	27.8777	28.0964
CUL5_HUMAN	Cullin-5	26.9238	27.1925	26.8362	26.7782	26.4692	26.9606	26.6067	NA	NA	26.3423	26.8809	26.6047	26.8286	26.6815	27.3293	NA	26.9772	26.7784	26.5495	NA	27.5207	27.4647	27.6008	27.418	27.0924	26.6857	27.0779	27.0611	27.2572	27.441	27.2735	27.3619	27.6153	27.3957	27.3985	26.9877	26.9025	27.6602	27.2969	27.4409	27.4799	27.2255	27.2436	26.8769	27.0025	27.0205	26.8666	27.0032
CUL9_HUMAN	Cullin-9	31.1296	31.1478	31.5675	30.7961	30.9001	30.374	30.7616	30.2484	30.6358	29.2497	30.7795	30.6019	29.9686	31.2968	29.8056	30.923	29.7104	30.1649	31.0231	NA	30.401	30.5282	30.5884	30.769	30.9507	30.5604	30.6597	30.3927	29.8366	30.2768	30.9677	30.6291	30.3547	31.0485	NA	30.3749	30.5577	30.4585	30.3841	30.3279	30.5249	30.5303	31.1972	30.5063	30.7473	31.1211	30.7302	30.6998
CUTA_HUMAN	Protein CutA	29.9228	29.7459	29.8562	30.1721	29.978	30.0091	29.9174	29.9862	29.8456	29.8805	29.7281	29.784	30.085	29.7862	30.0021	29.2047	30.0418	29.7442	30.1298	29.7862	29.9302	30.08	30.0971	29.9532	29.7926	29.9985	30.2118	29.9959	29.7912	29.5546	29.3803	29.8729	30.0349	30.2145	29.9883	30.0887	29.8411	30.0097	29.938	29.7947	29.9307	30.1203	29.6157	29.8218	29.6156	29.8765	29.3933	30.0359
CWC15_HUMAN	Spliceosome-associated protein CWC15 homolog	27.5706	28.4576	28.3452	28.0188	28.0807	28.2629	27.9736	27.7672	27.977	28.2966	28.0308	27.7794	27.6984	28.2513	28.0885	28.2397	27.7619	28.2327	28.1896	28.2733	28.3574	28.0279	28.2958	28.1283	28.367	28.0641	28.019	28.2397	28.2045	28.1688	28.5866	28.0354	28.2164	27.7719	28.02	28.1287	28.5176	28.1049	28.1559	27.9895	28.5399	28.4331	28.6579	28.2025	28.4412	28.0455	28.1848	28.0716
CWC22_HUMAN	Pre-mRNA-splicing factor CWC22 homolog	27.5604	27.7142	27.1966	27.5828	28.088	27.3668	27.3051	27.0959	27.4868	27.5527	26.4798	27.4441	NA	27.0915	27.2065	26.7427	27.1997	27.6369	27.1469	27.2316	27.0632	27.5412	27.5738	27.3222	27.2208	27.2374	27.2038	26.793	27.2604	27.7949	26.1801	26.6077	27.2832	27.2497	26.9904	26.993	26.9607	27.2729	26.6505	27.2574	26.6975	27.0809	27.3185	28.137	27.1133	27.2929	27.4634	NA
CX6B1_HUMAN	Cytochrome c oxidase subunit 6B1	29.5792	29.4309	29.3432	29.4183	29.701	29.3208	29.2005	29.2167	29.5951	29.6174	29.6053	29.8676	29.1453	28.9237	29.3203	29.447	29.4731	29.4607	29.5467	29.1635	29.8127	29.6817	29.8218	29.96	29.6399	29.945	29.5899	29.5365	29.6081	29.8681	29.809	29.6508	29.6272	29.5926	29.8143	29.7617	29.9979	29.7612	29.6339	29.8235	29.4081	29.5735	29.3128	29.6502	29.3153	28.9911	29.2263	28.9035
CY1_HUMAN	Cytochrome c1, heme protein, mitochondrial	30.4265	30.0599	30.4279	30.3063	30.6718	30.809	30.2904	30.3268	30.5462	30.4407	30.9405	30.7246	30.3556	30.6916	30.3284	30.2207	30.5236	30.4479	30.572	30.2915	30.7383	30.4456	30.3495	30.8088	30.6296	30.7458	30.6305	30.4861	30.6875	30.6739	30.6739	30.8398	30.9702	30.5007	30.73	30.5345	30.694	30.6743	30.6401	30.6084	30.6389	30.7206	30.3304	30.3029	30.9156	30.874	30.8276	31.0101
CY24A_HUMAN	Cytochrome b-245 light chain	28.1331	27.9216	28.2155	28.3044	28.1059	28.4221	28.1139	NA	28.1787	NA	27.9171	28.3686	28.4302	28.3249	28.499	28.4284	28.0626	28.4043	27.9867	27.6607	28.4196	28.1963	28.1158	28.5591	28.2566	28.074	27.9477	28.1591	28.4961	28.0097	28.2293	28.3937	28.7968	28.2519	28.1549	28.2187	28.1206	27.3313	28.2137	28.0502	28.3066	28.2686	28.244	28.3686	28.4188	28.4125	28.4645	28.6714
CY24B_HUMAN	Cytochrome b-245 heavy chain	30.1338	29.7868	30.1279	30.1276	30.1484	30.161	30.2797	30.0618	30.1211	30.2076	30.2059	30.1323	30.1135	30.2215	29.9646	30.018	30.2784	30.2285	30.0245	30.0131	29.9615	30.105	29.9256	30.1309	30.0355	29.9193	29.9642	29.9183	30.0625	30.2297	30.0198	30.0383	30.414	29.9764	30.2475	30.2615	30.2271	30.1821	30.1133	30.0729	30.1184	30.0371	30.1326	30.0017	30.1846	30.0095	30.1025	29.9646
CYB5B_HUMAN	Cytochrome b5 type B	29.8874	28.3965	29.9491	29.8466	29.7107	29.5885	29.5485	29.5077	29.8223	29.7101	29.6001	29.7966	28.9797	NA	NA	28.3055	29.6525	29.3306	29.1294	29.8527	30.1603	29.8249	29.4946	29.9119	29.3909	29.699	29.7103	29.4721	29.5081	29.2323	29.4208	29.1769	29.9227	NA	29.8083	29.1101	29.3156	29.5476	29.4945	29.4193	30.1727	29.3313	29.0788	29.2961	29.7503	29.3599	29.1858	30.126
CYBP_HUMAN	Calcyclin-binding protein	32.7356	32.6394	32.7087	32.7797	32.5985	32.3147	32.5999	32.6777	32.3406	32.4612	32.931	32.5797	32.4749	32.5889	32.7444	32.7236	32.4477	32.3613	32.988	32.5905	32.6131	32.9075	32.7611	32.7954	32.6658	32.8015	32.8446	32.898	32.6452	32.6711	32.7765	32.7415	32.6881	32.8797	32.8344	32.7947	32.691	32.7586	32.8967	32.6956	32.769	32.8343	32.7459	32.8699	32.8782	32.8132	33.0201	32.891
CYFP1_HUMAN	Cytoplasmic FMR1-interacting protein 1	31.0996	31.164	30.9963	31.2443	31.1798	30.7371	31.1295	31.0895	30.7668	30.802	30.9307	30.9805	30.9178	31.2203	30.9743	30.6858	30.8385	30.9676	31.1368	31.0003	31.1542	31.1833	31.059	31.0982	31.1897	30.9937	31.1611	31.0103	30.8957	30.9952	30.7354	30.9277	31.123	31.2053	31.0734	30.9458	30.8162	30.879	31.1297	31.0089	30.8586	31.1194	31.0173	31.0856	30.7716	30.805	31.0012	30.9434
CYTB_HUMAN	Cystatin-B	29.9855	29.891	30.2472	30.252	30.1039	29.6906	29.8932	29.8506	29.6563	29.8815	30.4049	29.9292	30.0592	30.0278	29.9424	29.6822	29.8857	29.6635	30.4176	30.0842	30.3173	30.4346	30.4546	30.4109	30.3227	29.9702	30.4523	30.3572	30.0771	30.1151	29.8926	30.3397	30.4397	30.2445	30.2768	30.3522	29.9218	29.9404	30.2952	30.095	30.8105	30.6458	30.1867	30.2269	29.9898	30.2203	30.3442	29.9408
DAAF5_HUMAN	Dynein assembly factor 5, axonemal	26.4642	26.6396	26.6728	26.6398	26.3901	26.4611	26.6072	26.8028	26.3936	26.353	27.064	26.5322	26.3667	26.3893	27.0234	NA	25.9525	25.8776	26.7791	26.773	27.0921	26.9882	26.6143	27.3217	26.6528	26.4151	27.285	26.8693	26.3815	26.1915	26.3567	26.6264	26.8364	27.0869	26.5592	26.7799	25.7033	26.4427	26.6479	26.632	26.8087	26.7856	27.4072	26.3883	26.5846	26.8335	27.0375	26.7642
DAB2_HUMAN	Disabled homolog 2	29.0073	29.4577	29.2021	29.3145	29.0771	28.9665	29.2314	29.0211	29.2673	28.9806	29.0939	29.3616	28.737	29.3067	28.9971	28.8955	28.7214	29.2124	29.2715	29.2264	28.9953	28.6087	28.5773	29.2168	29.1037	28.8788	29.0475	29.1983	29.0273	28.9091	29.3019	29.0498	28.5915	28.9418	29.2797	29.1351	29.1559	29.0157	28.8997	29.0792	29.106	28.9284	29.0125	29.14	29.2362	29.5024	29.3114	29.1949
DAD1_HUMAN	Dolichyl-diphosphooligosaccharide--protein glycosyltransferase subunit DAD1	27.2665	28.5338	28.1557	28.6888	28.9472	28.4538	28.563	28.8509	26.8579	29.0652	28.3432	28.9469	29.4079	29.1549	28.4747	NA	28.9949	28.9228	28.9884	28.8224	28.9485	29.0694	28.6972	NA	29.3727	29.3277	28.7289	NA	29.2948	28.8429	NA	29.9582	29.6037	28.9626	29.4572	28.7054	28.9365	29.3125	NA	29.6507	28.3534	29.0007	27.7992	28.6511	28.9542	29.1234	29.1109	27.9601
DAXX_HUMAN	Death domain-associated protein 6	27.5315	27.3173	27.6429	27.4887	27.7956	28.2956	NA	27.381	27.9522	NA	27.9203	28.194	27.6272	27.5753	28.9537	27.6366	27.9077	27.6301	NA	NA	27.4221	27.683	27.9121	28.0145	27.3903	27.8346	28.0625	27.1297	27.0382	27.5262	28.4302	27.6203	27.4312	27.5339	27.6686	27.9133	27.9749	27.4963	27.3979	27.8254	27.8078	27.122	27.3775	27.9004	28.1057	27.8132	27.4855	28.0288
DAZP1_HUMAN	DAZ-associated protein 1	30.9885	31.1519	31.1026	30.8418	30.8922	30.9615	31.2001	30.8255	31.1014	31.0789	30.9557	30.8708	30.9316	30.7782	30.9479	31.0182	31.1723	31.152	30.9633	30.7576	31.0271	30.9747	31.1775	31.276	31.2909	31.2467	31.2387	31.1274	31.196	31.2887	31.1519	31.2118	30.9727	31.3169	30.938	31.1012	31.4944	31.3276	31.0933	31.14	31.037	31.1392	31.3624	31.2916	30.9073	31.19	31.0859	31.0751
DBLOH_HUMAN	Diablo homolog, mitochondrial	28.6332	28.9058	28.7694	28.4704	28.4291	28.9016	28.9478	28.4713	28.4817	28.5781	28.4788	28.1378	28.612	28.8403	29.1279	28.8406	29.0616	28.7787	28.4163	28.6111	28.6738	28.668	28.9549	28.7585	28.8908	28.8162	28.5383	28.9996	28.7216	28.9538	29.7386	28.6644	28.7198	28.9533	28.3727	28.6878	28.9003	28.8547	28.8557	28.9227	28.8115	28.1597	28.8419	28.9694	28.9751	28.4846	28.9354	29.0731
DBNL_HUMAN	Drebrin-like protein	30.224	30.2475	30.2708	29.9664	30.143	30.0846	30.3502	30.1256	29.8591	30.0514	30.1581	30.1127	30.1138	30.2037	30.2629	30.32	30.3595	30.1407	30.1643	30.1421	30.1323	30.1977	30.0508	30.1763	29.9424	29.9361	30.1569	30.2204	29.9025	29.8204	30.1241	29.9796	29.981	30.2121	29.9773	30.0556	29.778	30.0404	30.1592	29.986	30.4268	30.4298	30.3409	30.2899	30.1642	30.1258	30.3511	29.9771
DC1I2_HUMAN	Cytoplasmic dynein 1 intermediate chain 2	28.4217	28.2773	28.616	28.462	27.8732	NA	27.8464	28.2151	28.242	28.1097	28.6375	28.5998	28.5109	28.0398	28.2307	NA	28.2216	28.0769	28.37	28.6657	28.4062	28.0826	27.4897	28.0248	27.9731	28.3624	28.2339	28.3805	28.1231	28.1949	28.4832	28.2862	27.8246	28.4039	28.0802	28.3108	28.2427	28.4666	28.3298	28.1621	28.5855	28.5828	28.4637	28.502	28.4296	27.9867	28.6621	NA
DC1L1_HUMAN	Cytoplasmic dynein 1 light intermediate chain 1	28.999	29.0364	28.6112	28.9286	28.4762	28.3535	28.6855	28.8487	28.4547	29.0308	28.5346	28.6987	28.6168	28.5341	29.6154	28.7072	28.6082	28.5935	28.9787	28.7124	28.3682	29.1079	28.5346	28.9028	29.0803	28.7783	28.6901	28.9529	28.2848	28.3187	28.4468	28.3431	28.6774	29.0349	29.049	28.3167	28.28	28.7407	28.755	28.3716	28.5206	28.7851	28.7066	28.4257	28.5049	28.7493	28.2996	29.2076
DC1L2_HUMAN	Cytoplasmic dynein 1 light intermediate chain 2	NA	26.2613	26.3567	26.4645	26.1001	NA	NA	NA	NA	26.3674	25.9955	NA	26.4917	NA	NA	26.0813	NA	NA	26.0943	26.2345	25.94	26.2362	25.9647	26.0307	26.0052	25.9202	26.7548	26.3632	26.3165	26.0626	26.0905	26.0015	25.9925	25.717	26.215	26.5027	26.0921	26.0214	26.1227	NA	26.5872	26.6165	26.1371	26.1087	26.1943	26.0193	26.7229	NA
DCAF7_HUMAN	DDB1- and CUL4-associated factor 7	27.1541	27.5811	27.4703	27.1971	27.355	NA	27.2734	NA	27.4349	27.1169	27.3971	27.2652	NA	27.4386	NA	NA	NA	27.0878	26.757	NA	27.3958	NA	NA	27.436	NA	26.9796	27.1023	27.2381	27.3448	NA	27.4126	NA	27.5173	27.5821	27.0811	27.3394	27.0338	26.9516	NA	27.1331	27.3529	27.3096	27.3072	27.2711	27.2583	27.6407	27.3097	NA
DCK_HUMAN	Deoxycytidine kinase	27.535	27.7408	27.314	27.1044	27.4304	NA	27.3224	27.8081	27.4717	27.6218	NA	27.6489	27.2338	27.1134	27.6426	27.1591	NA	27.8477	27.2267	27.4384	27.4567	27.6326	NA	27.5336	27.4404	27.75	27.3575	27.2475	27.2698	NA	27.624	27.3793	27.2764	27.7035	NA	27.021	27.0996	27.48	27.4108	27.3588	27.599	27.3767	27.4551	NA	27.3617	27.5857	27.0235	27.8473
DCP1A_HUMAN	mRNA-decapping enzyme 1A	26.8523	27.1159	27.1126	27.1166	26.8651	26.7257	27.525	26.826	26.8954	26.9765	26.8604	26.9337	26.9813	26.8934	27.4609	26.8957	27.1914	27.045	27.4867	26.8572	27.0634	26.9596	27.045	26.9483	27.263	27.1552	27.1726	27.1406	27.0025	27.6158	26.6249	26.8767	27.0551	26.9331	27.3701	27.029	26.9623	26.7864	27.3114	27.183	26.6013	26.8324	NA	26.9347	27.1906	27.2172	26.8585	NA
DCPS_HUMAN	m7GpppX diphosphatase	28.6109	28.3794	28.7502	28.7946	28.5815	28.5536	28.6244	28.8012	28.5087	28.3355	28.3658	28.5753	28.8847	28.2611	28.8117	28.4356	28.4815	28.3815	28.5246	28.3945	28.5421	28.7293	28.4783	28.5506	28.8403	28.4992	28.9594	28.5065	28.3935	28.6476	28.403	28.4907	28.7468	28.8105	28.6294	28.5544	27.965	28.6344	28.6206	28.8226	28.2242	28.5057	28.6077	28.6422	28.9319	28.2519	28.1846	27.9388
DCTD_HUMAN	Deoxycytidylate deaminase	27.6874	27.4296	27.6191	27.2643	27.3006	27.0253	NA	27.7144	27.0476	NA	27.8374	27.03	27.6854	27.4717	27.467	27.2206	27.3525	27.4536	27.6562	27.3101	27.9521	28.0086	27.8026	28.0096	27.7056	27.9372	28.0787	27.9061	27.693	27.7503	27.2993	27.7009	27.6593	28.031	27.8428	28.0191	27.4432	27.6718	27.9246	27.8615	27.3914	27.8365	27.5082	27.756	27.5291	27.7098	27.8135	27.2701
DCTN1_HUMAN	Dynactin subunit 1	28.764	29.0989	28.7927	28.9489	28.5895	28.6248	28.7908	28.9191	28.8452	28.951	29.0524	28.615	28.8021	28.7403	29.0853	27.9557	28.7034	28.6924	28.8667	28.6464	28.7143	29.0015	29.0348	28.7606	28.987	28.7658	29.0407	28.7056	28.719	28.9052	28.9344	28.8547	28.7215	29.0125	28.7905	29.1514	28.6939	28.8899	28.853	28.9188	28.8007	28.9828	29.0701	28.8522	28.6433	28.9333	28.6867	29.0941
DCTN2_HUMAN	Dynactin subunit 2	29.1022	29.294	29.2669	29.3086	29.1306	29.2339	29.5238	29.1356	28.9465	29.3326	29.1611	28.991	29.2777	29.2319	29.353	29.3408	29.035	29.2312	29.3532	29.2798	28.7449	28.9902	28.7746	29.0837	28.7343	28.7569	28.8104	29.094	28.601	28.108	29.0907	28.7755	28.6025	28.8279	28.6452	28.821	28.5749	28.525	29.1483	28.5564	29.0653	29.0985	29.16	28.8767	29.0887	28.846	29.003	29.1121
DCUP_HUMAN	Uroporphyrinogen decarboxylase	29.1031	29.1629	29.0175	29.2793	28.8572	28.7001	28.9448	28.8227	28.7232	28.594	29.2415	28.727	28.9853	29.1134	28.9013	28.3758	28.6559	28.7396	28.9776	28.8395	28.9982	29.4082	29.0598	29.2899	29.1968	28.9748	29.4474	29.2993	29.1444	29.0631	28.8617	29.1135	29.0088	29.2726	29.0747	29.2333	28.9626	29.1708	29.3234	29.1964	28.8941	29.1759	29.1884	29.2121	29.4212	29.0748	28.6153	28.7588
DCXR_HUMAN	L-xylulose reductase	28.0135	27.7796	28.2602	28.0487	28.1115	28.2402	28.4481	28.1515	28.2666	27.9774	28.1252	27.8554	28.0903	28.3833	28.2192	28.0725	28.4023	28.222	27.8307	28.0219	28.2027	28.1635	28.053	27.9224	28.1202	27.947	27.8345	27.9742	28.3268	27.9458	28.44	28.057	28.0846	27.9402	27.8949	27.9919	28.4704	28.2202	27.9335	27.8426	28.6658	28.1559	28.2292	28.0598	28.2706	28.1218	28.6457	28.6014
DD19A_HUMAN	ATP-dependent RNA helicase DDX19A	28.6591	28.0938	28.1905	28.4205	28.4707	27.7928	28.5574	28.3614	28.0159	28.2361	28.4219	28.2592	28.317	28.111	28.3864	27.8005	NA	28.2339	28.1437	28.4105	28.5556	28.8065	28.3696	28.4137	28.2066	28.459	28.4753	28.2513	28.3999	28.5043	28.3131	28.507	28.5227	28.5214	28.5549	28.3882	28.1987	28.5669	28.6193	28.4935	28.3841	28.2814	28.8468	28.5768	28.2791	28.6144	28.3674	28.408
DDB1_HUMAN	DNA damage-binding protein 1	31.8398	32.1699	31.9503	31.8251	31.9209	31.89	31.9264	31.6448	31.9951	31.8493	31.7917	31.8007	31.8027	31.9183	31.931	31.8763	31.8615	31.8927	31.8999	31.8527	31.9705	32.0793	32.095	32.1278	32.0908	32.0365	32.0453	31.9915	32.0433	32.0517	32.106	31.9478	31.908	32.0807	32.0136	31.9801	32.072	32.0369	31.9244	31.9693	32.0186	31.9665	32.0434	31.943	31.984	32.0504	31.8545	31.8371
DDRGK_HUMAN	DDRGK domain-containing protein 1	28.8282	28.7668	28.9873	28.7494	28.904	29.0383	28.9058	29.1578	29.2014	29.2195	29.0799	28.9998	29.0509	30.2733	28.7714	28.931	28.8067	29.0102	28.6229	28.9508	28.5794	28.913	28.6557	28.73	28.8717	28.8345	28.4587	28.9165	28.8565	29.0669	28.9573	28.9587	28.9256	28.5052	28.8257	28.6676	28.744	28.7741	28.6589	28.9595	29.1263	28.4973	28.8043	28.6425	29.4176	29.4627	28.6716	29.2045
DDX1_HUMAN	ATP-dependent RNA helicase DDX1	30.9542	30.9283	30.8362	30.9519	30.9196	30.8235	30.8839	30.8906	30.9906	30.8502	30.9992	30.8006	30.9027	30.8305	31.104	30.7736	30.8243	30.8567	31.0882	30.9254	30.9862	30.9468	31.1708	30.9537	30.9204	31.0738	31.0598	30.9986	31.073	30.9652	31.032	30.9593	31.0985	31.0623	31.0895	31.1504	31.1406	30.989	30.9949	30.9973	30.8602	30.8508	30.9382	30.9687	30.9341	31.1286	30.8888	30.8556
DDX10_HUMAN	Probable ATP-dependent RNA helicase DDX10	25.9145	26.1462	25.3314	25.8251	26.2945	26.2103	25.6038	25.816	26.2069	25.7668	25.1467	25.7294	26.3647	25.7881	27.3787	25.6672	25.8972	26.581	25.4564	25.7283	26.0933	25.9723	26.2731	26.0978	26.0813	25.9453	26.0881	26.0939	26.5836	26.6799	26.1047	26.0113	26.1982	26.58	25.7473	26.9615	26.0033	26.0762	26.0042	27.5785	25.4499	25.8547	25.9109	26.3134	25.8777	25.7582	26.0638	25.5972
DDX17_HUMAN	Probable ATP-dependent RNA helicase DDX17	32.6623	32.9209	32.8444	32.5523	32.7054	32.7564	32.7196	32.5106	32.838	32.6421	32.7963	32.7564	32.6382	32.7716	32.6448	32.9426	32.7755	32.679	32.8335	32.5341	32.8786	32.8167	33.0431	33.079	32.9549	33.0111	32.8985	32.9916	32.9955	33.0305	33.1624	32.9556	32.9074	32.8639	32.7841	32.8681	33.1297	32.9585	32.8394	32.969	32.9291	32.8589	33.0202	32.9956	33.16	33.0414	33.0246	32.7487
DDX18_HUMAN	ATP-dependent RNA helicase DDX18	30.6574	30.2532	30.1992	30.5692	30.605	30.5016	29.514	30.6782	30.3764	30.4442	29.4824	30.4954	30.7101	30.1181	30.3986	30.4539	30.3606	30.5695	30.4267	30.5777	30.4737	30.4197	30.776	30.3314	30.4676	30.3271	30.6168	30.3488	30.7405	30.5999	30.0963	30.1225	30.4247	30.404	30.2212	30.2414	30.5375	30.5814	30.3501	30.6485	29.7203	30.0457	30.0869	30.6324	30.1019	30.2944	29.687	30.3559
DDX21_HUMAN	Nucleolar RNA helicase 2	30.9745	31.1051	31.1031	31.0576	31.3252	31.668	31.4696	31.2492	31.3657	31.3113	31.6388	31.4483	31.3994	31.523	30.8931	31.1681	31.2136	31.0234	31.3234	31.1184	31.3099	31.2207	31.2297	31.1452	31.3751	31.3855	31.2694	31.5691	31.4613	31.4745	31.503	31.4345	31.358	31.2723	31.4039	31.1155	31.2236	31.4096	31.2705	31.2935	31.7784	31.3428	31.2243	31.2188	31.5557	31.6443	31.6043	31.4378
DDX23_HUMAN	Probable ATP-dependent RNA helicase DDX23	27.6324	27.7698	27.8746	28.1754	28.103	27.6724	26.9727	27.9896	28.29	28.1224	28.1842	27.9319	27.1533	26.9199	27.1694	27.9698	27.4396	27.9807	27.692	27.1766	27.9003	27.5795	27.8706	27.0474	27.6367	28.0431	27.7396	27.5807	27.9417	27.7893	28.3955	27.8495	27.677	27.4454	27.8312	27.3231	27.9474	27.8298	27.9131	27.8638	28.2028	27.8634	28.5926	28.2852	28.3893	27.6021	28.0488	28.0472
DDX27_HUMAN	Probable ATP-dependent RNA helicase DDX27	29.1396	29.0754	29.2251	29.0863	28.9438	29.1388	29.1545	29.0273	29.4833	29.1328	28.9072	29.0638	28.6598	29.2517	28.7397	28.9162	28.9723	29.087	29.0758	28.6052	29.1839	29.0867	29.1204	29.3258	29.1437	29.1038	28.8482	29.0946	28.9141	29.2466	29.3725	29.4233	29.2583	28.8492	28.946	29.1699	29.4393	29.2529	29.0284	29.2121	29.2345	28.752	29.1635	29.1491	29.4022	29.048	28.9714	29.298
DDX3X_HUMAN	ATP-dependent RNA helicase DDX3X	32.0949	32.2082	32.1413	32.1128	32.0279	32.1159	32.0706	32.146	31.988	32.0511	32.1923	32.0091	32.0925	32.1008	32.1476	32.0774	32.0856	32.0629	32.1112	32.1252	32.253	32.2382	32.2513	32.3075	32.2159	32.1772	32.2827	32.3905	32.3237	32.2027	32.26	32.2528	32.1321	32.2554	32.2691	32.1851	32.2005	32.2055	32.3836	32.1601	32.3649	32.3027	32.2416	32.2452	32.2963	32.3555	32.3066	32.177
DDX3Y_HUMAN	ATP-dependent RNA helicase DDX3Y	28.553	28.7079	28.6732	28.7782	28.7209	28.7468	28.6596	28.8625	29.0433	28.5623	28.7067	28.6444	28.6138	28.7961	28.6161	28.8168	28.2777	28.7289	28.6347	28.7306	28.5192	NA	28.862	28.9728	28.888	28.7792	28.7964	28.9987	28.5588	28.5984	28.9158	28.9228	28.7024	28.9342	28.7015	28.6016	28.6028	28.5579	28.8156	29.0979	28.7747	28.3523	28.9902	28.494	28.2807	28.7025	28.3973	28.2392
DDX41_HUMAN	Probable ATP-dependent RNA helicase DDX41	28.0474	27.5806	27.9172	27.6194	27.8495	27.6538	27.9896	NA	28.0237	27.6391	27.9278	27.8099	28.0207	27.8903	27.2236	27.1524	27.6541	27.7524	27.7106	27.8407	27.0724	27.522	27.6946	28.0123	26.8779	27.8336	27.6966	27.8318	27.3619	27.6257	27.766	27.7621	27.7589	27.6382	27.9418	27.3244	27.9218	27.7836	27.4491	27.7142	27.7419	27.7482	27.8727	27.8433	27.7779	27.9458	27.6678	27.3978
DDX42_HUMAN	ATP-dependent RNA helicase DDX42	30.2078	30.2109	30.3076	29.9781	30.187	30.341	30.4596	30.188	30.3803	30.325	30.1246	30.2015	30.1565	30.1246	30.3108	30.3145	30.3565	30.2036	29.9967	30.1709	30.1298	29.8918	30.2456	30.236	30.3423	30.0775	30.0982	30.173	30.294	30.3207	30.3659	30.2895	30.1756	30.1888	30.0655	30.2505	30.4412	30.2628	30.2562	30.1258	30.1813	30.0684	30.0923	30.2437	30.4595	30.1749	30.1762	30.1342
DDX46_HUMAN	Probable ATP-dependent RNA helicase DDX46	30.7317	30.9748	30.9816	30.4417	30.7345	30.6343	30.6468	30.5121	30.8382	30.7291	30.7505	30.6324	30.4467	30.78	30.8494	30.9812	30.7209	30.7504	30.7296	30.3895	30.8369	30.8151	31.0037	30.863	31.1218	30.9748	30.8579	30.9729	30.935	30.9368	31.1378	30.8299	30.6822	30.9318	30.7106	30.9741	31.1201	30.9604	30.7885	30.84	30.8658	30.9541	30.9999	31.123	31.1146	31.1314	31.0559	30.8119
DDX47_HUMAN	Probable ATP-dependent RNA helicase DDX47	26.8472	27.1069	26.9893	26.6602	27.2882	27.5207	27.8355	27.0024	26.9446	26.9749	27.5225	26.4505	27.2867	27.3577	26.5962	26.8877	26.5757	27.3434	27.043	28.2794	27.0077	26.949	26.7347	26.8092	26.5062	27.2645	27.0168	27.4282	26.9973	26.5699	26.7282	NA	27.2604	27.0605	26.8267	26.6638	27.1472	26.3269	26.742	27.3371	27.8654	26.5293	26.7552	26.8604	27.9111	27.2765	27.3031	26.7533
DDX5_HUMAN	Probable ATP-dependent RNA helicase DDX5	33.5387	33.7475	33.6853	33.41	33.5897	33.5749	33.6023	33.3013	33.7148	33.4975	33.6399	33.5898	33.2546	33.548	33.3799	33.6499	33.6034	33.5949	33.5537	33.3702	33.5877	33.5576	33.7163	33.7412	33.7084	33.6564	33.6258	33.6824	33.8178	33.813	33.9889	33.7594	33.5744	33.6284	33.5261	33.5777	33.9193	33.687	33.5659	33.6436	33.701	33.6879	33.7245	33.7662	33.8446	33.7887	33.8362	33.6349
DDX50_HUMAN	ATP-dependent RNA helicase DDX50	28.114	27.9887	27.8236	27.6201	27.8379	28.4515	28.1503	28.6208	28.4307	28.3675	28.1917	28.0675	28.4386	28.0465	28.2654	28.2719	28.1204	28.292	28.0668	27.9967	28.0804	28.1104	28.3436	28.1848	28.2491	28.4424	28.1718	28.182	27.9564	28.4129	28.0055	28.23	28.1443	28.5522	28.1044	28.0387	28.4542	28.4605	28.1464	28.2355	28.2227	27.8029	28.2139	27.7545	27.6521	28.1989	27.7434	27.8479
DDX51_HUMAN	ATP-dependent RNA helicase DDX51	26.4205	26.3928	25.7608	26.3614	26.3662	26.179	26.1362	26.3676	27.329	26.164	25.4721	25.9657	26.9698	26.0977	26.3318	26.3607	26.3359	26.4191	25.8122	26.0227	26.6266	26.6099	26.6466	25.5706	27.175	26.6963	27.2057	27.5968	27.2939	26.804	26.3234	25.5633	26.691	27.0261	26.7179	26.2699	27.1853	27.1169	26.8485	26.8753	26.0537	26.7852	26.993	27.1113	26.4639	26.9351	25.8225	24.9732
DDX54_HUMAN	ATP-dependent RNA helicase DDX54	32.2266	32.4091	32.3618	31.8172	32.0472	32.4312	32.2597	31.9877	33.0167	31.9662	32.2704	32.2661	31.9738	32.0657	31.8126	31.8373	31.9358	32.476	32.0347	31.916	32.3255	32.1731	32.5544	32.2558	32.4448	32.1458	32.1546	32.5323	32.5602	32.5138	32.7695	32.2627	32.2606	32.0909	32.1064	32.1683	32.4724	32.425	32.3	32.4091	32.162	32.049	32.5404	32.1256	32.4951	32.0199	32.2279	32.2289
DDX56_HUMAN	Probable ATP-dependent RNA helicase DDX56	27.9105	27.4026	NA	27.8713	27.8203	27.7147	27.1579	27.6732	27.411	27.7304	28.1481	28.0789	27.5956	27.1953	27.3137	27.2216	27.4957	27.445	27.4152	27.3504	27.373	27.7142	27.9282	27.563	27.465	27.5856	27.6232	27.6206	27.3724	27.4584	27.9749	27.4703	27.7426	27.8801	27.3407	26.8151	27.8348	27.3606	27.2314	27.5933	26.955	27.6936	27.1665	27.7093	27.8385	NA	27.4905	27.2752
DDX6_HUMAN	Probable ATP-dependent RNA helicase DDX6	30.0757	30.1137	30.3697	30.322	30.2921	29.6105	30.2013	29.9177	30.0821	30.0715	30.281	30.0402	29.8396	30.1021	29.9912	30.0541	29.8994	29.7628	30.3037	29.9342	30.0328	30.2769	30.1009	30.0638	30.0435	30.1435	30.0584	30.1224	30.0097	30.1138	29.9811	29.9822	29.8347	30.1081	30.0295	29.8776	29.9761	30.0605	29.9937	30.095	30.3196	30.0558	30.3467	30.2879	30.5005	30.2712	30.1841	30.2245
DDX6L_HUMAN	Probable ATP-dependent RNA helicase DDX60-like	26.6816	26.2617	25.9333	26.5754	26.7671	26.6174	26.6023	26.8173	27.4248	26.8135	26.5816	27.0095	27.0397	26.6508	27.1941	26.6246	26.8544	26.9558	26.8681	26.8693	26.921	26.7452	26.5113	26.9063	26.4745	26.6978	26.7317	25.5638	26.7469	26.7814	25.5026	26.3045	26.8544	26.9407	26.9819	26.4093	26.1765	26.7255	26.75	26.4531	26.0413	26.2018	26.057	26.4543	25.9138	26.856	26.0485	26.6724
DECR_HUMAN	2,4-dienoyl-CoA reductase, mitochondrial	32.3729	32.3511	32.5939	32.2223	32.504	32.8588	32.5087	32.3677	32.6556	32.6014	32.7011	32.5435	32.3903	32.5834	32.4129	32.6301	32.4617	32.604	32.4971	32.4113	32.6058	32.3422	32.32	32.7482	32.7873	32.7779	32.4138	32.7609	32.7433	32.7676	32.8167	32.9193	32.8145	32.5721	32.6315	32.6503	32.9797	32.6905	32.5902	32.7901	32.8368	32.4142	32.3634	32.3335	33.0232	32.8402	32.9232	32.6484
DEGS1_HUMAN	Sphingolipid delta(4)-desaturase DES1	27.7491	28.1366	28.2286	28.2982	28.3018	NA	28.2488	28.4317	28.0042	28.3506	28.6423	28.422	NA	28.4161	NA	NA	NA	28.2886	28.3457	28.2945	NA	28.0576	28.1631	28.0428	28.3836	28.4155	28.3038	28.0963	28.1066	28.3027	NA	28.6366	28.4875	27.9173	28.4339	28.2519	NA	28.1777	28.4186	28.4872	28.503	27.9211	28.1038	28.0307	28.435	28.1673	28.0193	NA
DEK_HUMAN	Protein DEK	29.2976	29.4096	29.4165	29.1618	29.172	28.7613	29.1189	28.9368	28.8451	29.0999	29.5848	28.975	28.9087	29.2716	29.1856	29.1212	29.0212	29.0175	29.2258	29.0826	29.5611	29.4346	29.6258	29.6321	29.5448	29.3566	29.4853	29.3956	29.4707	28.9894	29.5795	29.2759	29.4336	29.4021	29.1847	29.2334	29.4185	29.3018	29.3784	29.3575	29.631	29.4399	29.5567	29.584	29.9232	29.6001	29.5608	29.5877
DEST_HUMAN	Destrin	28.8998	28.7306	28.8344	29.2862	29.0745	28.6639	28.8643	28.775	28.6091	28.9508	28.7731	29.002	28.8244	28.6238	29.187	28.79	28.9553	29.3337	28.7814	29.128	29.3674	29.3125	29.1339	28.9413	28.8776	28.768	29.2735	29.2014	28.8344	29.1907	28.8771	28.8526	29.1991	29.2397	29.4531	29.0972	28.5948	29.0344	29.2573	29.3928	29.3789	29.071	29.0505	29.1563	29.5245	29.1483	29.2802	28.897
DFFA_HUMAN	DNA fragmentation factor subunit alpha	NA	NA	26.6299	26.98	27.0055	NA	NA	27.1327	NA	26.418	27.5263	26.5484	27.5839	NA	NA	27.5822	26.5552	27.1211	28.1448	27.1851	27.2705	27.5137	27.0548	27.4936	27.1368	27.1484	27.5719	27.573	27.0753	27.121	27.3714	27.4755	27.3629	27.4691	27.5276	NA	27.2475	27.2985	27.4497	27.4615	27.5419	27.3593	27.3801	27.351	27.1176	27.5985	27.2901	NA
DGKZ_HUMAN	Diacylglycerol kinase zeta	27.9705	27.9949	28.0137	28.2538	27.7478	NA	28.2754	28.4654	27.9258	NA	27.9493	27.8679	28.28	27.9765	28.9374	27.8578	27.6833	28.1625	28.2422	27.9822	28.0264	28.2953	28.0236	28.162	28.2619	27.944	28.2115	28.0136	27.5659	28.0205	27.9615	27.6685	28.2333	28.1421	27.7281	28.1373	27.6427	27.8999	28.1528	28.0829	28.2146	28.0171	27.9442	27.967	28.2204	28.3053	27.8451	27.276
DHB11_HUMAN	Estradiol 17-beta-dehydrogenase 11	30.5193	30.3126	30.3401	30.3637	30.4772	30.6149	30.2586	30.2806	30.4746	30.372	30.1911	30.5362	30.3813	30.407	30.0813	30.3204	30.2577	30.3581	30.1293	30.0943	30.4867	30.177	30.4756	30.5153	30.5831	30.4698	30.2512	30.3828	30.4027	30.2119	30.1925	30.4691	30.495	29.9664	30.4947	30.3141	29.7811	30.2907	30.1751	30.2922	30.444	30.2485	30.4318	30.4197	30.2685	30.2262	30.0725	30.0166
DHB12_HUMAN	Very-long-chain 3-oxoacyl-CoA reductase	31.1285	31.2559	31.2508	30.914	31.2392	31.6251	31.2235	31.2802	31.4147	31.2061	31.2174	31.1003	31.3274	31.5103	30.923	30.9461	31.1467	31.3218	31.1007	31.1062	31.0226	30.9642	31.1494	31.2439	31.1701	31.2043	30.8241	31.081	31.2299	30.9894	31.2083	31.3696	31.3862	30.9562	31.2556	30.9349	30.7529	31.1948	31.1579	31.0783	31.0139	30.7526	30.9621	30.7817	30.9051	31.4661	30.9574	31.0608
DHB4_HUMAN	Peroxisomal multifunctional enzyme type 2	33.0907	33.1054	33.2229	33.0085	33.1776	33.266	33.2462	32.9164	33.2518	33.1427	33.0612	33.0193	32.8554	32.891	32.922	33.074	32.9803	33.0026	32.951	32.9308	33.0716	33.0223	33.1009	33.144	33.1764	33.1259	33.1044	32.8916	33.1284	33.0881	33.3012	32.9736	32.9446	33.0304	32.9961	33.0298	33.2777	33.045	32.9244	32.9801	33.1457	33.0356	33.2875	33.0495	33.0745	33.0716	32.993	32.8854
DHC24_HUMAN	Delta(24)-sterol reductase	27.9622	27.9581	27.6466	27.7464	27.868	28.0952	27.7607	28.102	27.7888	28.1567	27.9637	28.1879	28.3062	28.2465	27.9557	27.6573	28.0535	27.9202	27.6072	27.7864	28.119	27.8089	27.9075	28.1505	27.8603	27.8379	27.7275	28.213	28.1525	28.2296	28.0932	28.2557	28.2773	27.9344	28.0013	27.8914	27.9777	28.2102	28.019	28.2167	27.5264	27.936	27.5387	27.6704	27.843	27.6666	28.4829	27.9141
DHE3_HUMAN	Glutamate dehydrogenase 1, mitochondrial	32.8956	32.4499	32.9374	32.677	32.9525	33.1636	32.758	32.5936	32.9134	32.9124	33.1357	32.9099	32.6425	32.8533	32.6258	32.8275	32.9171	32.7962	32.9773	32.6855	32.9661	32.7391	32.5952	33.0821	33.0178	33.0084	32.9197	33.0283	33.0002	33.0221	33.212	33.1891	33.0801	32.8796	32.9521	32.9487	33.1476	33.0543	32.9093	32.996	33.2386	32.8721	32.7541	32.8156	33.4993	33.3435	33.2584	33.1539
DHRS4_HUMAN	Dehydrogenase/reductase SDR family member 4	28.0076	28.2529	28.0404	27.6148	28.2198	28.2341	27.8071	28.048	28.663	28.4896	28.0567	28.0118	27.7899	28.1986	27.8555	NA	28.2173	28.1035	28.2914	27.8506	27.8223	27.6067	28.0484	27.7144	NA	27.9723	27.6213	28.1987	27.3132	27.6686	28.3024	NA	27.9185	28.0165	NA	27.8711	28.5228	28.2805	28.2426	27.3952	28.4653	27.8378	28.1419	28.1013	27.8844	28.3038	27.9052	28.14
DHRS7_HUMAN	Dehydrogenase/reductase SDR family member 7	27.3911	27.6071	27.7857	27.616	26.9773	28.0754	27.3317	27.6489	27.7803	27.9333	27.6738	27.3138	28.1248	27.7765	27.8315	27.1591	27.4556	27.989	27.3676	27.2614	27.2069	27.3223	27.4637	27.4181	27.2316	27.5308	26.997	27.5491	27.5112	27.3546	27.5775	27.5027	27.1587	27.4143	27.3223	27.3682	27.3571	27.553	27.3061	27.0093	27.4835	27.3727	27.6113	NA	27.9029	28.0618	27.6575	27.5459
DHSO_HUMAN	Sorbitol dehydrogenase	28.3799	28.5718	28.64	28.489	28.2157	28.4692	28.4929	28.4996	28.572	28.2822	28.419	28.2229	28.1777	28.5811	28.3579	NA	28.1417	28.3006	28.4228	28.048	28.2911	28.1594	28.2983	28.6046	28.2723	28.5248	28.4757	28.5894	28.3138	28.4581	28.208	28.0681	27.9621	28.457	28.2138	28.4843	28.0522	28.0229	28.6311	28.3628	28.2836	28.702	28.4837	27.8856	28.3614	28.1533	28.3817	28.4325
DHX15_HUMAN	Pre-mRNA-splicing factor ATP-dependent RNA helicase DHX15	31.9381	32.1465	31.9804	31.8474	32.0478	31.9123	32.0707	31.9511	32.1874	32.0344	31.7663	31.9087	31.9603	31.8796	32.0681	31.8978	31.917	31.9711	31.727	31.9153	32.1482	32.2566	32.268	32.2596	32.3829	32.3105	32.2271	31.9439	32.2323	32.2417	32.4145	32.0672	32.1816	32.1529	32.0762	32.0233	32.3962	32.1441	32.0442	32.1648	31.9845	32.0485	32.0612	32.114	32.2157	31.98	31.9293	32.0129
DHX30_HUMAN	Putative ATP-dependent RNA helicase DHX30	27.6366	27.4432	27.4748	27.5887	27.7856	27.9366	27.6282	27.946	28.0281	27.7135	27.997	27.7542	28.042	27.7456	27.6907	27.0362	27.8404	27.5171	27.467	27.21	27.7231	27.4032	27.3007	27.8142	27.6353	27.609	27.1341	27.7262	27.839	27.3088	27.5454	27.8209	27.9706	27.5082	27.7152	27.4803	27.7003	27.5692	27.52	27.564	27.5322	27.2576	27.6203	27.006	27.6287	28.1777	28.0119	28.0464
DHX36_HUMAN	ATP-dependent RNA helicase DHX36	25.408	24.9296	25.5899	24.9657	25.3752	25.0737	25.3378	25.8795	25.0618	25.0567	24.6194	24.4678	25.1888	25.0532	24.5925	NA	NA	24.8769	25.2202	25.239	24.0987	NA	25.3169	26.7345	25.2384	NA	25.1991	25.5459	24.7103	25.5977	25.0493	24.7787	25.0025	25.8474	25.0583	24.4374	25.4083	25.3336	25.2052	NA	25.7703	24.8044	25.2938	NA	25.0303	25.8182	24.678	24.9828
DHX9_HUMAN	ATP-dependent RNA helicase A	34.2644	34.4047	34.3933	34.1525	34.3052	34.3953	34.3967	34.223	34.4446	34.2855	34.1794	34.2199	34.2486	34.34	34.2919	34.2869	34.3995	34.3743	34.2015	34.2141	34.3544	34.3519	34.5206	34.544	34.5083	34.4785	34.3814	34.4589	34.5662	34.464	34.6275	34.5306	34.3256	34.3847	34.2558	34.3023	34.7094	34.4486	34.3518	34.4302	34.4611	34.4322	34.5365	34.5174	34.6191	34.5773	34.4835	34.3895
DIAP1_HUMAN	Protein diaphanous homolog 1	29.7811	29.8699	29.9203	30.0611	30.0527	29.3862	29.9232	29.9382	29.7022	29.5562	29.9218	29.8455	29.6374	29.8884	29.8498	29.0499	29.8116	29.602	29.704	29.802	30.1424	30.1216	30.2879	29.8289	29.6967	30.0206	30.0237	29.9541	29.6776	29.985	29.7018	29.765	29.9484	29.8393	29.9218	30.0701	29.455	29.8654	29.7268	30.0488	29.8979	29.6546	29.7429	30.0707	29.448	29.6479	29.623	30.0908
DIAP2_HUMAN	Protein diaphanous homolog 2	25.8417	24.9792	26.0419	25.909	25.7826	25.5824	25.7356	25.6272	NA	25.646	25.722	25.9233	25.7963	NA	25.7437	NA	25.4738	25.276	25.6617	25.733	25.8052	25.6833	25.3718	25.1167	25.587	25.4113	25.7532	25.4818	25.5361	25.0365	25.6918	25.3257	25.7364	25.7321	24.953	25.7147	25.2484	25.8692	NA	25.2953	25.9188	25.548	25.5052	25.4985	25.2264	26.1295	25.1271	25.8826
DIC_HUMAN	Mitochondrial dicarboxylate carrier	28.4412	27.628	28.4757	28.3527	28.6889	28.6652	29.3478	28.6717	29.1535	28.3652	28.7943	28.5188	29.2202	28.5868	28.0264	NA	28.3923	28.4826	28.2422	28.1633	28.7035	28.2908	28.182	28.3025	28.4761	28.6389	28.5556	28.5025	28.412	28.5063	28.4766	28.6735	28.8822	28.3752	28.9489	28.3698	28.5884	28.5763	28.3279	28.5905	28.6357	28.28	28.5083	27.9606	28.7233	29.5353	28.9026	28.6521
DIDO1_HUMAN	Death-inducer obliterator 1	25.7831	25.3107	25.5165	25.7817	26.2597	26.3374	25.8695	26.5395	26.8102	26.6648	26.1995	26.4267	26.6822	26.2041	NA	NA	26.4634	26.5316	26.3621	26.4339	26.4458	26.3229	25.6319	25.9227	26.4967	27.3037	26.6154	26.5646	26.4989	27.1166	25.0982	26.3941	26.7209	26.3789	26.7244	NA	26.5553	26.9903	26.8389	26.0031	26.8469	26.7837	26.5866	26.5109	26.7125	25.6531	25.4578	NA
DJB11_HUMAN	DnaJ homolog subfamily B member 11	30.8277	30.9385	30.9043	30.4369	30.7941	30.7011	30.7811	30.6325	30.9553	30.7645	30.6603	30.6603	30.7137	30.7741	30.7289	31.0283	30.9305	31.021	30.8515	30.829	30.7906	30.7246	30.8713	30.9149	30.9864	30.9292	30.8677	30.9768	31.069	30.7993	31.3783	31.0037	30.6549	30.9105	30.8027	30.7228	31.1598	30.9573	30.7662	30.8911	31.2689	30.8109	31.2502	30.9708	31.319	31.1019	31.0485	31.0987
DJC10_HUMAN	DnaJ homolog subfamily C member 10	29.0585	29.1125	29.2116	28.8855	29.1234	29.1319	29.3926	28.9847	29.0359	29.1718	28.734	28.8452	29.3933	29.5237	29.1826	28.4514	29.0271	29.0437	28.8963	28.9897	29.0797	28.9202	28.9888	28.9381	29.0886	29.1028	28.8989	29.063	28.784	28.9232	29.0796	29.3489	29.0411	28.6482	28.6795	28.9415	29.1472	28.6925	28.7364	28.9945	28.9011	28.7083	29.2054	29.0858	28.7632	29.1603	28.5243	28.8959
DJC11_HUMAN	DnaJ homolog subfamily C member 11	28.204	27.8198	28.1483	27.9825	28.1322	28.6326	28.2924	28.0098	28.1306	28.108	28.0434	28.1539	28.2564	28.1135	27.5704	NA	27.4202	27.9829	28.0892	27.6099	28.3322	28.1847	28.064	28.2524	27.6538	28.3264	28.2647	28.1478	27.8615	28.0525	27.4375	28.0473	28.182	27.8056	28.2809	27.8019	28.2098	28.1472	27.6892	28.0731	28.3951	27.9404	27.9376	27.5516	28.2317	28.3152	28.3948	27.6244
DJC13_HUMAN	DnaJ homolog subfamily C member 13	29.4137	29.4285	29.4269	29.4413	29.2447	29.147	29.6478	29.4654	29.338	29.3861	29.4363	29.3783	29.4015	29.4264	29.4485	28.821	29.0714	29.308	29.091	29.1775	29.367	29.1726	29.1984	29.1892	29.5016	29.1818	29.0822	29.3613	29.0714	29.494	29.3106	28.8382	29.2844	29.2397	29.1632	28.9884	29.1079	29.0912	29.0756	28.8479	29.5493	29.1706	29.3425	29.2078	29.3712	29.1746	29.1496	29.6731
DKC1_HUMAN	H/ACA ribonucleoprotein complex subunit 4	30.9394	31.1752	30.976	30.9376	30.9862	31.0755	31.1464	30.8717	31.1895	31.1083	31.1301	30.974	31.0042	30.7895	31.0316	31.0916	31.1105	31.0436	31.0629	31.0063	31.1547	31.055	31.199	31.1549	31.2159	31.3011	31.0953	31.1929	31.2089	31.2233	31.3874	31.2426	31.0903	31.1086	31.0433	30.9237	31.5	31.1789	31.0228	31.2094	31.0373	30.9287	31.2402	31.1992	31.2353	31.0291	31.0618	31.0645
DLDH_HUMAN	Dihydrolipoyl dehydrogenase, mitochondrial	31.0361	30.9254	30.9873	30.9189	31.045	31.3185	31.1073	31.314	31.3893	31.4349	31.3247	31.313	31.2052	31.367	31.2532	31.0854	31.4723	31.3135	31.0893	31.2373	31.2105	31.0734	30.9287	31.3321	31.3448	31.3471	31.3872	31.5386	31.4224	31.1993	31.448	31.6396	31.2487	31.3397	31.4652	31.4136	31.6041	31.4108	31.3329	31.2777	31.5138	31.162	30.8895	30.8563	31.5438	31.4126	31.7577	31.5418
DLRB1_HUMAN	Dynein light chain roadblock-type 1;Dynein light chain roadblock-type 2	28.8015	28.9504	29.0522	29.0761	28.9179	28.8903	29.0173	28.6756	28.6019	28.5751	28.9908	28.6406	28.7564	29.0686	28.591	28.5786	28.7276	28.7147	28.8542	NA	28.8267	29.0486	28.8654	28.6749	28.7114	28.8822	29.011	29.0059	28.7321	28.5537	29.0392	28.6331	28.6398	28.98	29.1693	29.1874	28.6502	28.7682	29.1995	28.8715	29.177	28.9974	29.2547	29.0287	29.2104	28.9554	29.1485	28.856
DNJA1_HUMAN	DnaJ homolog subfamily A member 1	30.6505	30.7814	30.7227	30.6978	30.5358	30.4845	30.7233	30.8563	30.6333	30.7878	30.6962	30.7146	30.8539	31.0678	30.9784	30.7413	30.7373	30.7811	30.7445	30.9828	30.7086	30.6788	30.4769	30.4333	30.5015	30.5529	30.5918	30.7696	30.9161	30.8458	30.8945	30.6809	30.4958	30.5077	30.5511	30.6654	30.7452	30.7313	30.7064	30.5423	30.8636	30.8391	31.0366	30.4691	31.178	31.1849	31.3481	31.523
DNJA2_HUMAN	DnaJ homolog subfamily A member 2	29.5295	29.2252	29.3994	29.7213	29.5852	29.4448	29.1724	29.6868	29.6633	29.7172	29.2147	29.6465	29.7158	29.2941	29.9424	29.4782	29.7416	29.6209	29.6914	29.5765	29.5045	29.6191	29.4585	29.5236	29.5738	29.7832	29.7052	29.4372	29.7617	29.5018	30.0128	29.5259	29.7211	29.8328	29.6862	29.9341	29.711	29.883	29.6686	29.8623	29.6054	29.8629	29.5302	29.6414	29.7517	29.66	29.3077	29.7334
DNJA3_HUMAN	DnaJ homolog subfamily A member 3, mitochondrial	28.802	28.2576	28.4386	28.4194	28.7547	28.9461	28.5068	28.4929	28.7941	28.4884	28.5942	28.8317	28.3351	28.9031	28.2027	28.5018	28.7284	28.4922	28.6759	28.552	28.7613	28.5309	28.3818	28.7822	28.5832	28.5396	28.7637	28.5294	28.8765	28.8707	28.8455	28.8576	28.7578	28.5904	28.8683	28.7216	28.8718	28.7876	28.6979	28.8765	28.2584	28.3717	28.2695	28.4598	28.8198	28.9491	28.6619	28.2744
DNJB1_HUMAN	DnaJ homolog subfamily B member 1	29.4098	29.5472	29.6499	29.5438	29.7833	29.4868	29.8098	29.4888	29.7766	29.562	29.5526	29.301	29.8219	29.7792	29.8931	29.5919	29.6216	29.6391	29.6835	29.8449	29.3176	29.3459	29.2089	29.5099	29.6981	29.5629	29.4224	29.8419	30.0379	29.9063	30.2474	30.0309	29.0858	29.1764	29.4642	29.4768	29.4001	29.4283	29.417	29.302	29.4938	29.5198	29.5601	29.5664	30.6986	30.5862	30.5522	30.6882
DNJC3_HUMAN	DnaJ homolog subfamily C member 3	30.585	30.9146	30.8656	30.5206	30.5636	30.8448	30.7975	30.7164	31.0042	30.9695	30.4868	30.7168	30.6914	30.8221	30.7125	30.8005	30.9276	30.822	30.784	30.7388	30.642	30.6566	31.0111	30.8447	30.8677	30.9749	30.7684	30.8191	30.9816	30.8992	31.2239	30.9102	30.6681	30.7612	30.6407	30.5802	30.9508	30.8695	30.673	30.7723	30.7021	30.6489	30.9668	30.8409	30.9003	30.8906	30.7898	30.7745
DNJC7_HUMAN	DnaJ homolog subfamily C member 7	29.6626	30.2071	29.9295	30.1787	29.5501	29.5072	29.9871	30.0165	29.7411	29.7852	30.316	29.7434	29.8887	29.9157	29.8409	29.8186	29.6526	29.5909	29.8397	30.123	29.3747	29.5377	29.485	29.6582	29.3959	29.4505	29.7064	29.8045	29.5914	29.4413	29.8969	29.6833	29.4149	29.6023	29.6467	29.6357	29.4077	29.4011	29.6567	29.3923	29.5297	29.6405	29.6947	29.6048	30.0817	29.941	30.0304	30.3112
DNJC8_HUMAN	DnaJ homolog subfamily C member 8	28.7055	28.6734	28.7229	28.4073	28.3785	28.6778	28.7321	28.8908	28.6388	28.6352	28.8021	28.5144	28.8484	28.802	28.9704	NA	28.5039	28.5925	28.7867	28.7506	28.6376	28.651	28.4845	28.5939	28.6098	28.658	28.3444	28.7737	28.647	28.6324	28.9058	28.5752	28.3755	28.5207	28.7019	28.4526	28.2212	28.3422	28.7716	28.5685	28.4397	28.6186	28.5487	28.4996	28.8986	28.5562	28.6054	28.9261
DNLI1_HUMAN	DNA ligase 1	25.8858	25.6652	26.1251	25.8044	25.9397	NA	NA	NA	NA	NA	26.0741	26.0262	NA	25.7266	NA	NA	NA	25.28	26.2108	NA	26.0205	26.3582	26.3334	25.4169	26.4115	25.8116	26.4492	26.62	26.1742	25.2319	25.646	25.9616	25.4693	26.1793	26.4761	25.7215	25.6763	25.9682	26.3481	25.9387	25.8492	25.299	25.7366	25.9208	NA	25.9701	25.8313	NA
DNM1L_HUMAN	Dynamin-1-like protein	30.859	30.9317	31.0946	31.0491	30.7769	30.6865	31.1651	31.0504	30.5965	30.8	30.965	30.7771	30.9824	30.9668	30.9792	30.7612	30.6572	30.7626	30.8948	30.7979	30.8874	31.0985	30.8818	31.0962	30.8054	30.8657	30.9297	30.9163	30.6364	30.4979	30.9304	30.7054	30.6829	30.9482	30.8213	30.9411	30.5424	30.7233	31.0739	30.7425	30.8956	30.8596	30.9034	30.7709	30.7558	30.826	30.8089	30.953
DNM3A_HUMAN	DNA (cytosine-5)-methyltransferase 3A	24.7817	NA	24.9828	24.882	25.1733	25.085	24.8907	25.2944	24.9026	24.5993	NA	24.9755	25.5004	24.7365	25.3909	NA	NA	25.0604	25.1304	NA	25.1973	NA	25.1049	25.2493	NA	25.0903	25.2309	24.6515	NA	24.8983	24.5784	25.2113	24.7545	25.0137	24.9948	NA	25.0452	24.7611	NA	24.9185	24.8042	24.8999	24.9113	25.1251	NA	24.4859	24.4154	NA
DNMT1_HUMAN	DNA (cytosine-5)-methyltransferase 1	27.7108	27.4926	27.5965	27.4256	28.0902	27.5634	27.3848	28.0241	27.3856	28.1529	28.335	27.8211	28.3627	28.0991	26.8282	27.046	28.3308	27.8266	27.7263	27.1554	28.2657	27.9706	27.798	27.7851	27.4633	27.8568	27.5756	27.837	27.9869	27.9185	27.3349	28.1917	27.9438	27.8541	27.2142	27.8036	27.2808	28.0111	28.0199	27.8699	28.256	27.5132	27.6779	27.0934	27.6146	27.1616	27.8065	27.6763
DNPEP_HUMAN	Aspartyl aminopeptidase	27.8595	27.7288	27.5802	27.6004	27.1754	27.449	27.4947	27.7001	27.2718	27.5165	27.6029	27.4136	27.9866	27.6068	28.0773	NA	27.7601	27.4357	27.8254	27.7528	27.6753	27.5611	27.6158	27.7837	27.8694	27.4589	27.7107	27.9073	27.5304	27.3412	27.2644	27.2654	27.3723	27.6528	27.7323	27.4144	27.5338	27.3306	27.836	27.8234	27.3891	27.9306	27.7361	27.5752	27.9665	27.4594	27.2456	27.6467
DNPH1_HUMAN	2-deoxynucleoside 5-phosphate N-hydrolase 1	29.6874	29.4157	29.3239	29.8782	29.4107	29.3238	29.3256	29.7613	29.1089	29.5426	29.7384	29.5231	29.4499	29.4567	29.6291	29.5173	29.4101	29.4295	29.7121	29.3094	29.6805	29.7428	29.4278	29.7795	29.3996	29.5191	29.7627	29.5395	29.4524	29.6028	29.3249	29.548	29.206	29.6416	29.8122	29.6882	29.3249	29.7841	29.5499	29.7451	29.1593	29.7885	29.3398	29.5668	29.0727	29.5139	29.6184	29.3812
DNS2A_HUMAN	Deoxyribonuclease-2-alpha	27.5085	NA	27.5974	NA	NA	27.3292	27.5141	27.8431	27.4539	NA	NA	27.2073	NA	27.6355	27.773	NA	NA	27.6165	27.4758	27.7853	NA	26.9441	27.5671	28.28	27.2117	NA	27.7781	NA	28.2058	27.8967	28.1431	NA	27.1963	NA	NA	28.1774	NA	26.4457	NA	NA	27.9238	27.9486	27.9196	27.8694	28.0277	27.7185	28.0138	27.4341
DOC10_HUMAN	Dedicator of cytokinesis protein 10	31.0293	31.1168	31.2043	31.1167	31.072	31.0842	31.4126	31.1347	31.3491	31.2034	31.0387	31.1155	31.0929	31.2452	31.2849	31.0801	31.1696	31.2364	31.202	31.0807	31.2931	31.2009	31.2997	31.1531	31.4347	31.1668	31.1975	31.294	31.1683	31.1433	31.3491	31.2785	31.3297	31.1981	31.2519	31.2819	31.0057	31.058	31.1483	31.2016	31.1887	31.1526	31.1125	31.246	31.2718	31.1335	31.0793	31.1641
DOC11_HUMAN	Dedicator of cytokinesis protein 11	27.5452	27.1232	26.5318	27.6986	27.5099	27.1715	26.9232	27.4749	27.3301	27.0204	27.0061	27.351	27.7015	26.7912	27.7772	NA	27.3202	27.3375	27.154	27.1661	27.1348	27.2053	27.253	27.1015	26.8796	26.904	26.742	26.6005	27.1482	27.5359	NA	26.5069	26.6235	27.4742	26.8763	26.9947	26.065	27.13	27.3084	26.8911	26.1303	26.3162	27.1317	27.7538	27.0017	26.7068	27.3471	27.1012
DOCK2_HUMAN	Dedicator of cytokinesis protein 2	29.9356	29.9885	29.8963	30.0213	29.9825	29.7989	30.1225	29.8473	29.8566	29.7393	29.9519	29.8553	30.1653	29.8419	30.0123	28.3132	29.5484	29.7331	29.9208	29.805	30.0871	30.0627	29.9993	30.0441	29.8831	29.9399	30.1288	29.9898	29.8224	29.8755	29.8689	29.7011	29.8674	30.0457	29.9414	29.9584	29.6072	29.7877	29.9563	29.9007	29.7183	29.9624	29.8499	29.8575	29.695	29.6727	29.6095	29.9317
DOCK8_HUMAN	Dedicator of cytokinesis protein 8	31.3922	31.3187	31.3033	31.5583	31.3893	31.2485	31.3661	31.3148	31.2473	31.3789	31.2898	31.3172	31.2063	31.163	31.1737	31.4946	31.2768	31.4384	31.4009	31.3316	31.4752	31.4981	31.5689	31.5216	31.6119	31.4253	31.5108	31.4819	31.4174	31.3554	31.403	31.3167	31.4783	31.5195	31.3937	31.4864	31.4349	31.3966	31.5355	31.4169	31.3977	31.4948	31.4823	31.5736	31.3563	31.2223	31.3207	31.2258
DOK2_HUMAN	Docking protein 2	27.4346	27.328	27.1863	27.5552	27.1507	27.3395	27.7459	27.4666	27.111	27.3866	27.55	26.8077	27.0147	27.5347	27.961	27.6603	27.2901	26.9797	27.5341	27.9276	27.3739	27.8622	27.1024	27.693	27.6225	27.5272	27.676	27.7598	27.4409	27.0982	27.7149	27.5355	27.2391	27.8483	27.5611	26.8359	26.9252	27.1137	27.333	27.2808	26.9107	27.2209	26.7961	27.0989	27.4302	27.4579	27.2118	28.2062
DOK3_HUMAN	Docking protein 3	27.0955	NA	26.3024	27.1329	26.6057	NA	NA	26.6726	26.6807	NA	26.8099	26.8635	26.6088	26.1349	NA	NA	NA	NA	27.5116	26.5809	26.9496	26.7752	26.711	26.7412	26.4386	26.9804	26.5299	26.4743	26.4589	26.6943	26.3541	26.1722	26.6747	26.7661	26.8472	26.9183	26.3304	26.7007	26.6757	25.9187	26.7032	26.7922	26.7174	26.8442	26.7591	27.084	25.6533	NA
DOP2_HUMAN	Protein dopey-2	27.0824	26.5995	26.9198	27.138	26.895	27.0378	27.0499	27.188	27.1427	27.0288	26.7664	26.9327	27.0807	27.1768	27.1445	26.2539	26.5754	27.0217	27.1575	27.0233	27.1714	27.1643	26.7752	26.7703	26.9993	27.1907	27.0565	26.8019	26.7512	27.7395	26.3504	26.518	27.198	27.0254	27.1349	26.915	26.6655	27.1284	26.9745	26.9951	27.257	26.8788	26.7773	27.3617	26.6006	26.8281	26.7013	27.607
DOPD_HUMAN	D-dopachrome decarboxylase;D-dopachrome decarboxylase-like protein	29.5567	29.7139	29.3793	29.8823	29.6129	29.4608	29.7153	29.921	29.5326	29.5664	29.9174	29.7202	29.3793	29.5481	29.7248	29.5842	29.3178	29.4713	29.6027	29.6457	30.0363	30.084	30.0056	29.9769	29.9306	29.9087	29.9738	29.9109	29.6342	29.7111	29.7255	29.8925	30.019	29.9418	30.0578	29.9856	29.6775	29.846	30.0058	29.9649	29.8027	30.2157	29.721	30.0389	29.5336	29.905	29.6696	29.4851
DP13A_HUMAN	DCC-interacting protein 13-alpha	28.3714	28.4303	28.3336	28.5563	28.1401	28.1785	28.2427	28.5427	28.1389	27.9126	27.9836	28.4036	28.5234	27.6555	28.5484	29.0838	28.3278	28.508	28.4468	28.4022	28.326	28.566	28.5269	28.1194	28.2799	28.2848	28.2686	28.1955	28.1533	28.2122	28.1057	28.0208	28.2418	28.3949	27.5784	28.4278	28.2149	28.0374	28.4445	28.2205	27.8428	28.4678	27.9886	27.9408	28.0177	28.0059	28.1501	27.8345
DPM1_HUMAN	Dolichol-phosphate mannosyltransferase subunit 1	29.4426	29.3998	29.536	29.4654	29.767	29.8388	29.4424	29.5787	29.7127	29.6294	29.4672	29.6268	29.6078	29.477	29.3291	29.5124	29.5854	29.5825	29.4761	29.1895	29.7009	29.2415	29.6323	29.5836	29.5084	29.423	29.4751	29.4388	29.7128	29.5679	29.4292	29.6549	29.8956	29.4434	29.7013	29.4188	29.4926	29.781	29.5404	29.5779	29.2933	29.5128	29.6292	29.4217	29.4424	29.8451	29.4457	29.7945
DPOD1_HUMAN	DNA polymerase delta catalytic subunit	28.7388	28.5884	28.236	28.531	28.542	28.2252	28.2712	28.607	28.7478	28.3281	28.5533	28.3185	28.5313	28.3114	28.6236	27.63	28.398	28.096	28.8997	28.2372	28.2722	28.7213	28.8383	28.6022	28.0297	28.1451	28.5863	28.2644	28.2824	28.1756	28.34	27.684	28.5974	28.6873	28.7776	28.4714	28.1984	28.4128	28.6503	28.5869	28.343	28.8758	28.6299	28.6146	27.6266	28.03	28.2247	28.858
DPP2_HUMAN	Dipeptidyl peptidase 2	31.1817	31.293	31.0449	31.2334	31.2764	31.099	31.1725	31.0103	31.1492	31.1761	31.076	31.2947	30.9854	31.1178	31.1003	31.0612	31.2623	31.3029	31.0711	31.1297	31.2041	31.281	31.5158	31.1328	31.1838	31.3812	31.2728	31.1673	31.4652	31.2672	31.4891	31.2128	31.1918	31.279	31.1278	31.2533	31.4252	31.3723	31.3013	31.3058	31.2675	31.2066	31.1885	31.3661	31.3273	31.1269	30.9473	31.0644
DPP3_HUMAN	Dipeptidyl peptidase 3	29.5918	29.4242	29.6206	29.8298	29.5213	28.815	29.45	29.1739	29.0994	29.4102	29.5991	29.6388	29.5011	29.5306	29.6605	28.995	28.9323	29.2975	29.6358	29.394	29.5226	29.7739	29.33	29.6121	29.364	29.3308	29.4225	29.617	29.2593	29.0456	29.5049	29.4737	29.3462	29.6669	29.5646	29.3399	29.049	29.2445	29.5966	29.4621	29.5573	29.5868	29.5757	29.4683	29.29	29.4502	29.4245	29.3668
DPY30_HUMAN	Protein dpy-30 homolog	28.6565	28.5776	28.699	28.6331	28.741	28.8115	28.3884	28.3766	28.8846	28.7537	28.3419	28.6171	28.6395	28.5778	28.9995	28.6532	28.7685	28.8092	28.3466	28.7731	28.7968	28.9273	28.7462	28.4663	28.8216	28.983	28.6333	28.4331	28.7364	28.842	28.6463	28.3494	28.7791	28.8408	28.7586	29.5395	28.9382	28.7982	28.5472	28.6707	28.9052	29.0325	28.7646	29.2422	28.9988	28.9388	28.7366	28.4796
DPYL2_HUMAN	Dihydropyrimidinase-related protein 2	32.3888	32.4728	32.4732	32.5572	32.3086	32.2335	32.4626	32.3951	32.2592	32.3435	32.5214	32.3756	32.2102	32.5237	32.3751	32.3794	32.2578	32.3707	32.6362	32.4907	32.491	32.5941	32.4977	32.5698	32.4616	32.551	32.5343	32.6424	32.3666	32.4022	32.6564	32.5101	32.4848	32.6238	32.5516	32.5963	32.3301	32.3459	32.5455	32.4591	32.4929	32.6964	32.5288	32.5508	32.5972	32.6257	32.6365	32.4936
DREB_HUMAN	Drebrin	27.9799	NA	28.1985	NA	NA	28.3913	28.1329	28.3419	28.0949	27.9922	27.9987	28.3473	NA	28.2358	28.3675	28.4854	28.7568	28.5186	28.5136	28.2935	28.3727	27.9417	28.0289	28.2465	28.6092	28.1437	28.3828	28.1624	27.5685	28.0205	28.8742	28.0423	27.7795	27.4853	NA	28.2501	28.6168	28.305	28.052	28.2286	28.9203	28.5568	28.9867	28.3038	28.7777	28.6543	28.6835	28.4044
DRG1_HUMAN	Developmentally-regulated GTP-binding protein 1	29.1533	29.4334	29.0993	29.3458	29.236	28.8071	29.2712	29.0785	28.7479	28.795	28.8936	28.7272	29.068	28.9619	29.1567	28.5839	28.8043	28.6918	28.708	28.9232	29.2144	29.2157	29.324	29.0206	28.9447	28.6969	29.3552	28.9612	28.8824	29.0193	28.9238	28.7225	29.4487	29.2829	28.8573	28.6814	28.5897	28.9844	28.8137	28.9465	28.8004	29.1751	28.8192	29.3404	28.4137	29.3186	28.8237	28.731
DSRAD_HUMAN	Double-stranded RNA-specific adenosine deaminase	31.2144	31.3232	31.4515	31.1146	31.3165	31.2371	31.3346	31.1361	31.6648	31.2719	31.1947	31.2059	31.3928	31.2472	31.1606	31.1622	31.1487	31.3531	31.0771	31.1691	31.1978	31.2159	31.4694	31.3412	31.3128	31.1661	31.253	31.3532	31.3399	31.3482	31.2079	31.248	31.2292	31.1815	31.1443	31.1476	31.4903	31.4572	31.1579	31.2492	31.2271	31.1821	31.1648	31.3008	31.2605	31.1904	31.3564	31.1292
DUS12_HUMAN	Dual specificity protein phosphatase 12	NA	27.4093	27.1562	27.0838	27.1183	26.8147	26.6102	27.2945	NA	26.6625	27.1792	NA	26.7327	26.9693	27.1069	NA	27.1073	NA	26.6551	NA	27.6191	27.4994	27.4992	27.3732	27.3188	27.3714	26.8538	NA	27.2453	27.0533	26.3395	27.2947	27.3494	27.2223	27.2882	27.343	26.9486	27.0179	27.3995	26.8406	26.8948	27.0305	26.9811	26.5389	26.7226	27.1858	27.1996	27.0586
DUS23_HUMAN	Dual specificity protein phosphatase 23	28.6865	28.9261	28.613	28.1733	27.9419	28.3043	28.6883	28.66	27.9419	27.6421	28.6737	28.7569	28.7732	28.5144	28.0049	28.245	28.4157	28.0742	28.6663	27.9299	28.7275	28.6527	28.8258	28.4039	28.5635	28.5137	28.7812	29.0077	28.6013	28.5135	28.7273	28.6465	28.3196	28.5917	28.6837	28.8151	28.4007	28.5558	28.5946	28.5297	28.4131	28.5155	28.5192	28.5954	28.4701	28.491	28.6292	28.5949
DUS3_HUMAN	Dual specificity protein phosphatase 3	28.567	28.928	28.7754	28.4974	28.3221	28.2671	28.6931	28.7943	28.9183	28.363	28.6874	28.7177	28.6379	28.8066	28.4506	28.2028	28.6529	28.5029	28.6921	28.9409	28.519	28.5116	28.4189	28.5827	28.3921	28.4745	28.5779	28.6312	28.2549	29.0984	28.6194	28.477	28.5531	28.6192	28.5905	28.5292	28.2366	28.6241	28.5452	28.5696	28.9335	29.465	28.7786	29.0969	28.7273	28.8761	28.9504	28.9803
DUT_HUMAN	Deoxyuridine 5-triphosphate nucleotidohydrolase, mitochondrial	29.6235	29.6932	29.6777	29.5662	29.4504	29.547	29.9121	29.5116	29.629	29.5843	29.9404	29.5637	29.6261	29.6069	29.5255	29.4453	29.4632	29.4783	29.5442	29.6848	29.5784	29.7566	29.2695	29.7523	29.5705	29.5226	29.6762	29.7181	29.3074	29.5568	29.6389	29.3786	29.5379	29.5987	29.6317	29.7102	29.5493	29.6665	29.7039	29.4762	29.8914	29.931	29.6536	29.5993	29.7788	29.693	29.7862	29.77
DX39A_HUMAN	ATP-dependent RNA helicase DDX39A	31.0658	30.976	30.9288	30.6672	30.8255	30.7407	30.9681	30.8708	31.0923	30.9289	30.7025	30.6594	30.5493	30.6425	30.8642	30.6283	30.6675	30.7903	30.6638	30.8448	30.8681	30.6754	30.9071	30.9893	30.8586	30.9322	30.838	30.9906	30.9324	30.8804	30.8079	30.8342	31.0364	30.694	30.74	30.6324	31.1766	30.9158	30.7327	30.8102	30.4959	30.5545	30.7598	30.9686	30.6375	30.557	30.5553	30.8744
DX39B_HUMAN	Spliceosome RNA helicase DDX39B	33.5075	33.5233	33.6086	33.3688	33.5156	33.4453	33.4554	33.2727	33.7009	33.4065	33.3482	33.3061	33.2442	33.3158	33.4065	33.2699	33.438	33.4254	33.3971	33.2771	33.415	33.483	33.6782	33.513	33.6221	33.494	33.5462	33.497	33.6013	33.5775	33.5782	33.4841	33.5118	33.5119	33.3012	33.4379	33.7892	33.6062	33.4243	33.4526	33.4656	33.4606	33.5181	33.5812	33.5348	33.4951	33.4527	33.3204
DYHC1_HUMAN	Cytoplasmic dynein 1 heavy chain 1	32.7406	32.7417	32.7651	32.8329	32.6824	32.649	32.7853	32.7255	32.5512	32.6483	32.7703	32.6747	32.7774	32.7349	32.8216	32.5004	32.5383	32.5507	32.7828	32.6981	32.8642	32.9089	32.7721	32.8429	32.777	32.71	32.8077	32.7959	32.6278	32.679	32.6892	32.7166	32.7311	32.8828	32.8425	32.7939	32.434	32.5738	32.8654	32.686	32.614	32.7499	32.7021	32.5977	32.5779	32.708	32.6738	32.7526
DYL1_HUMAN	Dynein light chain 1, cytoplasmic	30.9791	31.0102	31.2016	31.2239	30.9507	30.96	30.9066	30.746	30.6356	30.766	31.0303	30.9795	30.767	30.6092	30.8868	31.2655	30.9028	30.9769	31.013	30.9086	30.9775	31.0598	30.9454	30.8448	31.1586	31.007	31.2288	31.1458	31.0523	31.0123	30.2061	30.411	30.8106	30.915	30.6236	30.6609	30.9677	31.0179	31.0103	30.8503	30.6128	31.4014	31.3104	31.1713	30.8217	30.3326	30.8175	30.6703
DYN1_HUMAN	Dynamin-1	27.4723	27.5317	27.4764	NA	27.3016	27.7277	NA	27.8564	NA	NA	27.718	27.4731	NA	NA	27.8051	NA	NA	27.3535	27.6216	27.4073	NA	27.7669	28.0615	NA	27.847	NA	27.9129	27.5027	27.5896	NA	27.1758	27.3129	27.7332	28.4732	27.6411	27.9627	28.1923	27.9429	27.8109	27.7027	NA	27.5753	26.521	27.2676	27.2308	27.7571	26.7218	27.6142
DYN2_HUMAN	Dynamin-2	30.5276	30.6038	30.5784	30.7177	30.5994	30.5716	30.6954	30.6909	30.4112	30.4108	30.6589	30.49	30.6349	30.5265	30.7153	30.067	30.4058	30.522	30.6345	30.5265	30.7261	30.7458	30.7684	30.5637	30.7662	30.7182	30.7495	30.6619	30.5916	30.7069	30.6633	30.6035	30.7231	30.6845	30.6006	30.6294	30.6391	30.5425	30.9262	30.7125	30.5488	30.4974	30.6161	30.526	30.6106	30.5015	30.4354	30.6766
DYST_HUMAN	Dystonin	29.4281	NA	29.5479	29.0704	29.4133	30.0817	NA	29.2397	29.9717	29.7689	NA	29.6486	NA	28.9454	29.3691	29.8387	29.7552	29.6336	30.6837	NA	29.3832	28.7578	NA	30.2341	28.8017	29.5031	29.6664	NA	29.9513	29.2151	NA	29.7553	NA	29.3065	NA	29.484	29.1941	29.48	29.0794	29.2171	NA	NA	30.2918	29.1614	28.907	29.4989	29.7931	29.4518
E2AK2_HUMAN	Interferon-induced, double-stranded RNA-activated protein kinase	29.2192	29.6034	29.5862	29.2235	29.3257	29.4344	29.4455	29.4747	29.3945	29.4304	29.3694	29.2843	29.4566	29.5022	29.4804	29.17	29.1434	29.1957	29.4649	29.2874	29.2497	29.305	29.4359	29.4022	29.1364	29.3162	29.3399	29.2897	29.1245	29.1039	29.5094	29.3272	29.1228	29.1958	29.2827	29.3218	29.1263	29.0234	29.2708	29.1404	29.4428	29.6808	29.5171	29.2682	29.2684	29.6724	29.3847	29.3617
E41L2_HUMAN	Band 4.1-like protein 2	30.7982	31.0228	31.1607	30.7347	31.0316	31.035	31.1058	30.9915	30.9719	31.1674	31.1731	30.8367	30.9466	31.033	31.1609	31.1943	31.3073	31.0895	30.8876	31.1483	30.7272	30.8051	30.8236	30.8791	31.1114	30.9281	30.8526	31.1255	31.0439	30.8197	31.2241	31.1007	30.6524	30.8662	30.95	30.9458	31.3444	30.9342	30.8617	30.8758	31.1003	30.991	31.0854	31.0352	31.3584	31.0951	31.2251	31.0686
EBP_HUMAN	3-beta-hydroxysteroid-Delta(8),Delta(7)-isomerase	28.6445	28.4281	28.7914	28.8193	29.0655	NA	NA	28.41	28.3674	28.6985	28.9304	28.6564	28.6252	28.6099	27.8514	28.33	NA	28.2974	28.371	28.2465	29.0189	28.4333	28.7609	28.6857	28.8956	28.5375	27.5225	28.6236	28.8667	27.9982	27.2347	28.8192	29.3413	26.697	28.8555	28.4284	28.5408	28.0132	28.5479	29.1276	29.1496	28.9292	28.536	28.7052	28.9419	28.5061	28.7901	28.0245
EBP2_HUMAN	Probable rRNA-processing protein EBP2	29.4425	29.7163	29.5249	29.4668	29.4899	29.568	29.5503	29.5844	29.7129	29.5681	29.6446	29.4381	29.4622	29.3663	29.4749	29.8332	29.3392	29.5443	29.5773	29.6453	29.4256	29.0716	29.5123	29.3856	29.3851	29.3054	29.3181	29.5748	29.6141	29.5742	30.0309	29.471	29.5455	29.1357	29.2724	29.2535	29.7864	29.4745	29.3948	29.4641	29.9278	29.8894	29.8593	29.8403	30.0149	29.4746	30.0048	29.8135
ECD_HUMAN	Protein ecdysoneless homolog	NA	25.2244	24.8226	25.5662	25.6624	25.2111	25.3927	25.6626	NA	25.4636	NA	25.5691	26.2975	25.1816	25.708	NA	NA	NA	NA	25.381	25.9956	25.6075	26.0451	25.6354	NA	NA	NA	25.2924	25.7739	NA	NA	25.6538	25.7121	25.9228	NA	NA	25.5217	25.5651	25.9021	25.4866	25.6906	25.6082	24.954	25.6801	25.3161	25.738	25.4113	25.5517
ECH1_HUMAN	Delta(3,5)-Delta(2,4)-dienoyl-CoA isomerase, mitochondrial	31.4348	31.116	31.6435	31.1349	31.4897	31.7431	31.3619	31.3166	31.425	31.5905	31.5203	31.3814	31.3175	31.6325	31.2993	31.4035	31.5229	31.3912	31.5061	31.2728	31.7218	31.3986	31.3615	31.8278	31.6784	31.8165	31.4834	31.7851	31.8619	31.7527	32.0177	31.9932	31.7245	31.7119	31.7125	31.5903	31.9486	31.7176	31.6496	31.6719	31.7473	31.5522	31.4926	31.3679	32.0872	31.9854	31.9877	32.0903
ECHA_HUMAN	Trifunctional enzyme subunit alpha, mitochondrial	33.308	33.1498	33.5056	33.2291	33.434	33.8549	33.3536	33.3897	33.5824	33.6237	33.6646	33.5401	33.5181	33.7117	33.3122	33.4565	33.6576	33.5319	33.4375	33.4809	33.6001	33.3767	33.2476	33.6063	33.5897	33.6547	33.4924	33.6947	33.6223	33.5884	33.8261	33.9016	33.7547	33.4845	33.6635	33.4888	33.7548	33.4822	33.5339	33.6044	33.667	33.2894	33.2256	33.1364	33.8893	33.9609	33.8519	33.7653
ECHB_HUMAN	Trifunctional enzyme subunit beta, mitochondrial	32.241	32.0068	32.2746	32.101	32.3478	32.5799	32.1399	31.976	32.4475	32.4249	32.5405	32.328	32.1654	32.301	32.0208	32.2668	32.3685	32.3757	32.3408	32.2234	32.3801	32.1137	31.9643	32.3243	32.3888	32.5092	32.233	32.4255	32.5465	32.4567	32.6725	32.6236	32.5988	32.2665	32.3854	32.2803	32.5786	32.3506	32.332	32.3504	32.3694	32.202	32.0416	32.1578	32.7229	32.6544	32.7848	32.5782
ECHD1_HUMAN	Ethylmalonyl-CoA decarboxylase	28.2688	28.7548	28.3321	28.4388	28.3864	28.5305	28.3084	28.5032	28.5448	27.7674	28.2925	27.8938	28.2384	28.4594	28.3463	28.5647	28.5033	28.2531	28.5865	28.5002	28.4439	28.4244	28.4082	28.2344	28.3403	28.5092	28.3307	28.4902	28.231	28.1801	28.6737	28.0445	28.0311	28.4902	28.3235	28.6329	28.3131	28.5153	28.4742	28.1543	28.343	28.4479	28.3222	28.5166	28.321	28.4434	28.3076	28.5555
ECHM_HUMAN	Enoyl-CoA hydratase, mitochondrial	31.2862	31.16	31.3921	31.219	31.1315	31.4709	31.5694	31.2546	31.4904	31.5525	31.5466	31.2066	31.4458	31.5275	30.9158	31.2554	31.3407	31.4073	31.2557	31.3249	31.3252	31.0146	31.0723	31.0979	31.2545	31.2022	31.2564	31.2154	31.0958	31.1549	31.3692	31.2969	31.4461	31.1944	31.2064	31.1514	31.44	31.2055	31.1386	31.2293	31.3448	30.7816	30.9766	30.8798	31.775	31.6629	31.3548	31.4386
ECI1_HUMAN	Enoyl-CoA delta isomerase 1, mitochondrial	28.6028	28.4042	28.4824	28.3803	28.6118	28.4575	28.6137	28.5263	28.48	28.5101	28.8049	28.6602	28.9511	28.5729	28.4596	28.6197	28.6921	28.7327	28.4872	28.958	28.7076	28.2657	28.2786	28.54	28.8333	28.8445	28.2914	28.6356	28.8396	28.7437	28.727	28.9982	29.0433	28.313	28.8528	28.9852	28.9809	28.9084	28.6154	27.9892	28.6268	28.3562	28.1938	28.364	28.691	28.842	28.7479	28.6179
ECM1_HUMAN	Extracellular matrix protein 1	28.3565	28.8393	28.4776	28.4121	28.4299	28.5926	28.5769	28.4826	28.4319	28.5963	28.7331	28.2399	28.4647	28.5579	28.5204	28.2548	28.4068	28.6381	28.7946	28.4491	28.4167	28.2736	28.4543	28.4251	28.4433	28.3174	28.3126	28.4136	28.4614	28.3045	28.2284	28.3776	28.2707	28.4897	28.1597	28.2302	28.357	28.3087	28.385	28.3188	28.3189	28.3828	28.5505	28.5026	28.1964	28.7567	28.065	NA
ECM29_HUMAN	Proteasome-associated protein ECM29 homolog	28.5404	28.4277	28.6176	28.5421	28.3397	28.4777	28.2404	28.7574	28.1517	28.3776	28.4583	28.3723	28.6192	28.3753	28.6486	27.998	28.3286	28.0818	28.5177	28.2013	28.7758	28.7774	28.7601	28.7551	28.6381	28.5347	28.6047	28.4391	28.5051	28.8604	28.3985	28.5137	28.4405	28.7324	28.77	28.5792	27.9777	28.3038	28.6202	28.4603	28.5169	28.4628	28.4285	28.3065	28.3706	28.7992	28.5502	28.5943
EDC3_HUMAN	Enhancer of mRNA-decapping protein 3	26.4722	NA	NA	26.4624	NA	NA	NA	NA	NA	NA	NA	26.465	NA	25.5586	26.5465	NA	NA	NA	NA	NA	NA	26.2135	25.8985	NA	26.0105	26.0065	25.9937	26.1216	NA	26.0806	NA	25.7879	25.9794	NA	NA	26.0603	NA	26.2346	NA	25.8197	NA	26.4205	NA	26.3353	26.0938	26.3183	NA	NA
EDC4_HUMAN	Enhancer of mRNA-decapping protein 4	29.1646	29.3274	29.392	29.4312	29.052	29.2395	29.16	29.3813	28.9366	29.2122	29.5427	29.0362	29.0577	29.1196	29.3625	29.3524	29.2142	29.0153	29.5198	29.0779	29.0137	29.3501	29.5277	29.241	28.9514	29.3754	29.1541	29.1462	29.1826	29.1308	29.3312	29.3083	29.3949	29.335	29.3428	29.2533	29.2016	29.198	29.28	29.4397	29.2413	29.2436	28.8206	29.2044	29.7065	29.4852	29.2685	29.4123
EDEM3_HUMAN	ER degradation-enhancing alpha-mannosidase-like protein 3	27.1874	26.1944	25.7131	26.6454	26.5085	26.9547	26.9266	NA	26.7157	NA	NA	26.8039	26.6348	NA	26.3287	NA	26.6005	NA	25.6884	NA	26.2278	26.1363	26.3704	26.6911	26.7803	26.7155	26.5969	NA	26.7327	26.5466	NA	NA	27.1672	NA	26.855	26.6776	26.6005	26.8859	NA	26.8976	26.4148	26.6752	26.6054	27.0285	26.7712	26.7135	26.0904	NA
EDF1_HUMAN	Endothelial differentiation-related factor 1	29.4364	29.3607	29.3759	29.5468	28.9276	29.0413	29.223	28.9696	29.0179	29.4337	29.4379	29.05	28.8111	29.3762	29.0911	28.8607	29.0043	29.318	29.0856	29.0433	29.0762	29.2112	29.4922	29.4885	29.3124	29.4393	29.3297	29.6802	29.3497	29.1228	29.388	29.3923	29.3374	29.4141	29.2298	29.3189	29.3887	29.3168	29.594	29.374	29.234	29.4876	29.5292	29.2471	29.2567	29.3958	29.4027	29.0473
EEA1_HUMAN	Early endosome antigen 1	29.758	30.2145	29.972	30.0401	29.5698	29.7322	29.956	29.8447	30.03	29.9548	29.8988	30.2464	29.7562	30.017	29.7352	30.1795	30.0926	30.2265	29.9335	29.9263	29.986	29.7923	30.1812	30.1486	30.0519	29.9609	29.9438	30.0684	30.1471	30.0645	30.1849	30.0987	29.8725	30.0001	29.7991	30.1145	30.1517	30.1663	29.9769	29.9151	30.4763	30.3312	30.5322	30.3001	30.6255	30.2914	30.236	30.0276
EF1A1_HUMAN	Elongation factor 1-alpha 1;Putative elongation factor 1-alpha-like 3	36.3559	36.2325	36.1289	36.3742	36.233	36.2058	36.2669	36.2839	35.9551	36.0796	36.2658	36.1779	36.2395	36.2163	36.2447	36.252	36.0428	36.1209	36.2347	36.2507	36.4945	36.6212	36.4967	36.4408	36.4194	36.5473	36.4882	36.5536	36.304	36.3549	36.448	36.4094	36.3653	36.499	36.5157	36.5026	36.2203	36.3648	36.584	36.4535	36.3853	36.5123	36.3788	36.5222	36.3972	36.4217	36.3723	36.2957
EF1B_HUMAN	Elongation factor 1-beta	31.39	31.386	31.4548	31.6603	31.2487	31.0973	31.3657	31.6344	31.2597	31.4242	31.3996	31.3948	31.4096	31.3445	31.4004	31.0789	31.1287	31.3167	31.7407	31.2941	31.4542	31.6353	31.3289	31.5742	31.4114	31.5983	31.5053	31.776	31.2972	31.3863	31.5931	31.478	31.3783	31.6528	31.5348	31.4823	31.335	31.3993	31.6581	31.4841	31.4916	31.4455	31.4168	31.3173	31.3834	31.6225	31.2699	31.347
EF1D_HUMAN	Elongation factor 1-delta	32.3685	32.6753	32.6452	32.4661	32.3554	32.4346	32.682	32.3489	32.3616	32.3862	32.5627	32.335	32.3028	32.5244	32.5143	32.3805	32.3113	32.3628	32.3647	32.474	32.4918	32.5962	32.3673	32.5704	32.4169	32.5132	32.4441	32.7016	32.3783	32.392	32.4986	32.3789	32.3673	32.4979	32.3995	32.5135	32.407	32.3514	32.635	32.4555	32.6052	32.9196	32.8267	32.7605	32.5597	32.505	32.6796	32.4614
EF1G_HUMAN	Elongation factor 1-gamma	33.439	33.4497	33.5627	33.6864	33.441	33.3217	33.4979	33.2928	33.0926	33.2632	33.4096	33.4955	33.2717	33.2773	33.4735	33.3595	33.1374	33.2383	33.3704	33.4103	33.6609	33.7318	33.7205	33.6576	33.5129	33.5613	33.6738	33.5439	33.4929	33.3883	33.2777	33.4018	33.421	33.6101	33.6256	33.456	33.2748	33.4639	33.665	33.5511	33.4834	33.8065	33.6425	33.71	33.3801	33.1449	33.4351	33.3768
EF2_HUMAN	Elongation factor 2	34.9393	34.8987	34.8989	34.9758	34.8137	34.6868	34.9212	35.0333	34.6643	34.7456	34.9776	34.7488	34.8805	34.933	35.0717	34.6977	34.6852	34.7158	34.9169	35.0167	35.0418	35.132	35.0461	35.1093	34.9202	34.9496	35.1397	35.0837	34.7849	34.8502	34.8938	34.89	34.7882	35.1161	34.9652	35.0328	34.6704	34.9097	35.1522	34.9287	34.895	35.1496	34.8935	35.0075	34.7353	34.9097	34.9092	34.9478
EFGM_HUMAN	Elongation factor G, mitochondrial	30.1158	29.7234	30.143	29.8048	30.3001	30.3722	30.0321	30.1481	30.1383	30.1509	30.2246	30.1202	29.9431	30.1087	29.623	29.8982	30.1218	30.0458	30.1573	30.1536	30.0042	29.8553	29.8357	30.1571	30.1109	30.2647	29.8985	30.2021	30.0398	30.077	30.2854	30.1944	30.3326	29.9295	30.1403	30.0865	30.1575	30.0941	29.9626	30.2225	30.1282	29.6947	29.6868	29.4858	30.3525	30.3157	30.333	30.2172
EFHD2_HUMAN	EF-hand domain-containing protein D2	30.688	30.5816	30.7877	30.5553	30.5213	30.5395	30.9177	30.5631	30.4093	30.6464	30.4795	30.3992	30.355	30.5903	30.4893	30.4911	30.3624	30.2319	30.4758	30.4722	30.8029	30.6613	30.6073	30.7016	30.448	30.4198	30.562	30.5606	30.4302	30.3336	30.2886	30.3016	30.422	30.4272	30.6289	30.5458	30.3238	30.4165	30.6031	30.4254	30.9598	30.8922	30.6597	30.763	30.4066	30.3077	30.5815	30.3292
EFR3A_HUMAN	Protein EFR3 homolog A	27.4367	27.1495	27.1788	27.5269	26.9903	27.3738	26.681	26.9313	26.7322	27.4605	26.2307	27.2751	27.5559	26.7691	27.2071	27.7756	27.535	27.6182	27.0904	27.059	26.2502	26.914	26.8749	26.8217	27.3345	26.8553	27.411	26.5651	27.2319	26.746	26.5294	26.8704	27.4827	26.0454	26.4215	27.1911	27.1609	27.2059	27.487	26.5101	26.7415	26.8127	26.843	27.4862	26.5046	26.7157	26.0584	27.158
EFTS_HUMAN	Elongation factor Ts, mitochondrial	28.3809	27.6826	28.348	28.1145	28.3393	28.8741	28.2026	28.5304	28.6029	28.5226	28.3698	28.1663	28.5649	28.3166	27.8773	NA	28.1511	28.2592	27.9562	28.5251	28.221	28.2561	28.1286	28.1206	28.3324	28.2332	28.2635	28.0982	28.4412	28.2037	28.3463	28.3201	28.0623	28.4994	28.1249	28.2689	28.3958	28.3007	28.1374	28.2515	28.3568	27.9927	27.7839	27.7778	28.5372	28.5472	28.481	28.4256
EFTU_HUMAN	Elongation factor Tu, mitochondrial	33.1845	33.0477	33.2674	32.931	33.3172	33.7044	33.3348	33.4151	33.6347	33.4927	33.447	33.2594	33.3919	33.4212	33.152	33.4105	33.4687	33.4444	33.3031	33.2396	33.2562	33.0683	33.0048	33.1848	33.3275	33.265	33.1286	33.3911	33.4699	33.3422	33.5659	33.4529	33.3474	33.1832	33.3127	33.293	33.5991	33.3646	33.2746	33.3507	33.6002	33.3027	33.2058	33.0843	33.7496	33.6867	33.8276	33.6789
EGLN_HUMAN	Endoglin	29.5504	29.439	29.4835	29.7794	29.7637	29.6978	29.6602	29.1484	29.4587	29.4531	29.6802	29.4344	29.2721	29.5286	29.2402	29.4666	29.2694	29.355	29.5911	29.1629	29.3658	29.385	29.6006	29.4227	29.3222	29.2217	29.3651	29.1306	29.1231	29.151	29.2649	29.0514	29.5765	29.4401	29.2354	29.0362	29.3983	29.2567	29.1747	29.0057	29.5754	29.2971	29.3755	29.5072	29.1257	29.2992	29.0229	29.2258
EH1L1_HUMAN	EH domain-binding protein 1-like protein 1	28.9158	29.3903	28.9029	29.5988	28.8997	28.8813	28.8611	29.2586	29.1125	29.1518	29.376	28.7719	29.1785	29.5068	29.394	29.0881	29.3023	29.302	29.0521	29.7757	28.6758	28.8134	28.3895	28.8228	28.5012	28.4236	28.49	28.9243	28.8108	28.4176	28.3276	28.3126	28.8543	28.3063	28.6183	28.8417	28.6674	28.7104	28.7652	28.591	29.3243	28.8869	28.5555	28.519	28.6197	28.4439	28.8202	29.1893
EHD1_HUMAN	EH domain-containing protein 1	28.6835	28.3836	28.5954	28.7823	28.3279	28.4032	28.2619	28.5022	28.2963	28.5659	28.3852	28.4384	28.8291	28.4749	28.6141	NA	28.4391	28.5791	28.5896	28.6207	28.6547	28.7891	28.3457	28.7341	28.6832	28.611	28.6191	28.6513	28.8778	28.676	28.6782	28.5806	28.8094	28.805	28.8787	28.3765	28.4835	28.5715	28.71	28.8795	27.8297	28.4356	28.305	28.1854	27.991	27.9206	28.0027	28.3427
EHD4_HUMAN	EH domain-containing protein 4	30.7058	30.747	30.7346	30.7474	30.5723	30.4926	30.6651	30.5468	30.3274	30.4755	30.729	30.7133	30.5424	30.8439	30.7396	30.6322	30.4254	30.6099	30.6384	30.6556	30.8237	30.766	30.8282	30.9058	30.6978	30.6798	30.6525	30.8398	30.6309	30.7011	30.8232	30.8579	30.8205	30.6787	30.7586	30.8446	30.5697	30.7054	30.76	30.7659	30.9002	30.8032	30.8681	30.7519	31.0615	30.8536	30.7882	30.7069
EHMT2_HUMAN	Histone-lysine N-methyltransferase EHMT2	27.0006	26.7191	27.022	26.6759	27.0799	26.8856	26.8884	NA	26.6466	26.876	27.1971	26.604	26.8023	26.981	26.7992	NA	NA	26.6569	27.3847	26.5982	26.5962	26.3551	26.889	26.9662	27.0689	26.693	26.4966	27.0536	26.5547	26.4968	26.6339	26.4889	26.7206	26.2635	26.6492	NA	26.9685	26.6988	26.6337	26.718	26.9542	26.564	26.7423	26.952	26.7554	26.3427	26.4135	NA
EI2BA_HUMAN	Translation initiation factor eIF-2B subunit alpha	28.0242	27.6303	27.7509	28.1139	28.0405	27.1839	28.1989	27.99	27.6595	27.5857	28.0981	27.5791	28.3586	27.8611	27.8461	NA	27.3673	27.3801	27.0401	27.747	28.1174	28.2888	28.1777	28.1781	28.0989	28.1788	28.3117	27.9113	27.9826	27.606	27.7151	28.0269	28.1412	28.1694	28.2453	28.091	28.1732	28.0079	28.2057	28.4426	27.8716	28.1578	28.044	28.0614	27.6855	27.7097	27.8669	27.6857
EI2BB_HUMAN	Translation initiation factor eIF-2B subunit beta	27.5332	27.2761	27.2329	27.3778	26.998	27.42	NA	27.5128	27.6435	27.4077	27.5399	27.4332	NA	27.3235	NA	NA	26.9295	NA	27.6826	27.272	27.4447	27.5385	27.5294	NA	27.2578	NA	27.2936	27.6339	27.6596	27.4304	27.5237	27.4576	27.3214	27.4369	27.4088	27.1533	27.119	27.0198	NA	27.3758	27.033	26.9004	27.4279	27.388	27.4391	27.1676	26.8772	27.8381
EI2BD_HUMAN	Translation initiation factor eIF-2B subunit delta	26.7863	27.0815	26.868	26.9744	27.1137	NA	26.8374	NA	NA	NA	26.9274	26.9544	NA	26.0363	NA	NA	26.655	26.7517	27.1232	NA	NA	27.3217	27.3347	27.2171	26.8187	26.8949	NA	26.9783	NA	26.8021	25.7607	26.9487	27.1176	26.9909	26.8989	26.833	26.6836	26.8127	27.1658	26.7929	NA	27.0535	27.2147	26.7974	26.4054	26.6413	26.487	NA
EI2BE_HUMAN	Translation initiation factor eIF-2B subunit epsilon	27.6658	28.0318	27.1045	28.0009	27.4601	27.2715	27.814	27.188	27.3382	27.4466	27.9592	27.4249	27.0226	27.626	27.3354	NA	27.442	27.2979	27.6941	27.5969	27.6871	27.5694	27.7507	27.511	27.516	27.0543	27.6288	27.4607	27.3277	27.4711	27.3771	27.2368	27.4617	27.7584	27.5026	27.7576	27.2959	27.5795	27.7784	27.7595	27.5725	27.6658	27.8561	27.5477	27.4994	27.2937	27.5708	27.6564
EI2BG_HUMAN	Translation initiation factor eIF-2B subunit gamma	27.5618	27.5073	27.4844	27.4939	27.1906	NA	27.3359	26.9158	NA	NA	NA	26.1634	26.1339	27.4635	26.8033	NA	NA	26.215	27.6058	27.3399	27.3937	27.4431	27.5187	27.7144	26.9951	27.7258	27.6232	28.2138	27.0295	27.6736	27.4029	27.2223	27.5057	27.9806	27.4487	27.5965	28.0594	27.3388	27.4487	28.002	27.3562	27.4835	27.3058	26.2547	27.4451	27.3279	27.2193	NA
EIF1_HUMAN	Eukaryotic translation initiation factor 1	30.3277	30.2908	30.3532	30.5496	30.2608	30.3603	29.9754	30.8989	30.664	30.4233	30.4033	30.5393	30.5603	30.396	30.5125	30.0402	30.5855	30.5653	30.6344	30.4646	30.226	30.5028	30.277	30.0655	30.2799	30.3674	30.7695	30.3135	30.3664	30.3537	30.3484	30.3131	30.5385	30.5743	30.7941	30.6259	30.2537	30.404	30.5089	30.764	30.2492	30.2668	30.3216	30.2689	30.2692	30.411	30.2995	30.4598
EIF2A_HUMAN	Eukaryotic translation initiation factor 2A	29.668	29.7668	29.7794	29.6926	29.5592	29.3961	29.8623	29.3057	29.5034	29.6144	29.7755	29.6672	29.7427	29.7124	29.6349	29.6297	29.27	29.4324	29.5859	29.8672	29.6047	29.6651	29.8683	29.6842	29.4526	29.5631	29.6284	29.7014	29.5419	29.4318	29.7453	29.5884	29.5419	29.835	29.608	29.7388	29.3801	29.5719	29.6306	29.6606	29.7319	29.9058	29.8661	29.8446	29.975	29.6824	29.7979	29.5327
EIF3A_HUMAN	Eukaryotic translation initiation factor 3 subunit A	31.8425	31.9818	32.0568	31.8293	31.7562	31.621	31.8417	31.6695	31.6691	31.7288	31.7695	31.6769	31.6997	31.7474	31.8148	31.763	31.5733	31.6912	31.7145	31.7247	31.9262	31.8784	31.8861	31.9074	31.7975	31.7049	31.8994	31.7876	31.7288	31.7582	31.8869	31.7997	31.7918	31.9935	31.7177	31.7742	31.69	31.7811	31.8313	31.8068	31.8539	31.9068	31.9884	31.9124	31.7855	31.6917	31.6554	31.861
EIF3B_HUMAN	Eukaryotic translation initiation factor 3 subunit B	30.7325	30.6775	30.8007	30.811	30.8134	30.3919	30.6801	30.3946	30.4847	30.4851	30.7345	30.8539	30.3584	30.4408	30.6079	30.4201	30.4171	30.5426	30.816	30.4763	30.9205	30.87	30.9228	30.8484	30.7608	30.7155	30.8612	30.6391	30.7409	30.6824	30.601	30.6957	30.9249	30.8449	30.7803	30.8924	30.7092	30.6905	30.749	30.7561	30.6468	30.7411	30.7062	30.8698	30.4964	30.6382	30.6418	29.9862
EIF3C_HUMAN	Eukaryotic translation initiation factor 3 subunit C ;Eukaryotic translation initiation factor 3 subunit C-like protein	30.8259	31.0557	30.8559	30.8449	30.8072	30.6888	30.7383	30.5553	30.5997	30.6968	30.7832	30.8215	30.4898	30.7136	30.8509	30.9738	30.6476	30.6979	30.8852	30.6478	30.9148	30.9091	31.1937	31.0687	31.0294	30.8755	30.8681	31.0477	30.9109	30.8571	30.9071	30.9391	30.9326	30.9964	30.8232	30.9627	30.7828	30.7364	31.0066	30.9578	31.0423	30.979	31.0285	30.9548	31.1916	30.849	30.808	30.8698
EIF3D_HUMAN	Eukaryotic translation initiation factor 3 subunit D	30.3784	30.5951	30.5029	30.3962	30.2367	30.2484	30.1022	30.1414	30.3925	30.2952	30.3347	30.2964	30.0287	30.4892	30.3805	30.0958	30.1375	30.2804	30.2694	30.2467	30.388	30.4665	30.5873	30.4595	30.3014	30.4755	30.4202	30.2633	30.5728	30.2286	30.2475	30.2144	30.3328	30.4701	30.446	30.3254	30.3669	30.4283	30.547	30.395	30.4207	30.3611	30.4438	30.4626	30.4693	30.4168	30.3207	30.1415
EIF3E_HUMAN	Eukaryotic translation initiation factor 3 subunit E	30.6534	30.9715	30.8125	30.8968	30.664	30.5642	30.7182	30.5788	30.4281	30.7051	30.704	30.7203	30.6456	30.6443	30.8136	30.6353	30.5888	30.5407	30.4961	30.8424	30.9296	31.0734	30.9443	30.9077	31.0192	30.8555	30.7962	30.8509	30.7908	30.8717	30.9538	30.8626	30.8319	30.8832	30.8191	30.9323	30.7386	30.7806	30.979	30.8755	30.9089	30.9478	31.0252	30.9726	30.9344	30.8147	30.9056	30.9269
EIF3F_HUMAN	Eukaryotic translation initiation factor 3 subunit F	30.8002	30.8344	30.9816	30.715	30.7731	30.6432	30.8508	30.7953	30.6624	30.5364	30.6815	30.6392	30.8413	30.5973	30.7301	30.8496	30.5627	30.6104	30.9015	30.7027	30.7137	30.754	30.7822	30.8441	30.7952	30.7222	30.9101	30.8137	30.7949	30.6588	30.7857	30.7404	30.6839	31.0263	30.6968	30.8801	30.6764	30.8081	30.8095	30.7249	30.6544	30.8324	31.0156	30.8866	30.7516	30.7556	30.5115	30.772
EIF3G_HUMAN	Eukaryotic translation initiation factor 3 subunit G	29.7857	29.872	29.969	29.8787	29.695	29.7682	29.8588	29.5884	29.7822	29.8826	29.9025	29.8788	29.8404	29.9516	29.9581	29.7909	29.7246	29.8035	29.8353	29.733	29.385	29.6275	29.7716	29.6771	29.5457	29.7429	29.6472	29.4581	29.8655	29.5914	29.7609	29.6665	29.3963	29.6168	29.8035	29.8973	29.6085	29.6768	29.6627	29.726	29.8192	29.7144	29.6976	29.5779	29.8141	29.6557	29.6876	29.663
EIF3H_HUMAN	Eukaryotic translation initiation factor 3 subunit H	30.1955	30.1844	30.2703	30.2722	30.0639	30.1606	30.1753	30.3565	30.0054	30.1749	29.9578	30.1944	30.3698	30.1624	30.4882	30.3188	30.1955	30.0842	30.0841	30.1011	30.252	30.3126	30.3237	30.3725	30.3307	30.2699	30.1287	30.2749	30.3741	30.0557	30.4153	30.238	30.191	30.1498	30.1522	30.1794	30.3614	30.2479	30.2545	30.3505	30.3804	30.1864	30.3292	30.2587	30.0512	30.1471	29.9387	30.4298
EIF3I_HUMAN	Eukaryotic translation initiation factor 3 subunit I	30.6999	30.8705	30.8391	30.7227	30.6357	30.509	30.7089	30.67	30.4531	30.7668	30.6198	30.5625	30.5991	30.7127	30.7216	30.796	30.7484	30.8311	30.5578	30.8425	30.7322	30.7092	30.6911	30.7025	30.7899	30.8247	30.7516	30.7227	30.7932	30.658	30.7103	30.5994	30.6688	30.6981	30.7459	30.7719	30.7998	30.8085	30.792	30.7287	30.9338	30.8465	30.8713	30.637	30.9758	30.6741	30.8627	30.8704
EIF3J_HUMAN	Eukaryotic translation initiation factor 3 subunit J	29.378	29.4245	29.5022	29.447	29.1548	29.1915	29.1088	28.5958	29.2569	29.1485	29.6048	29.3556	29.1009	29.4918	29.3537	29.5372	29.1931	29.0313	29.6246	29.4123	29.7252	29.5348	29.5259	29.6942	29.7994	29.5385	29.4982	29.8564	29.5459	29.3579	29.6968	29.4547	29.3546	29.6606	29.6473	29.4677	29.5294	29.4474	29.7048	29.4399	29.3679	29.6354	29.5656	29.2596	29.2221	29.4728	29.6252	29.4635
EIF3K_HUMAN	Eukaryotic translation initiation factor 3 subunit K	29.6577	29.2691	29.58	29.6595	29.4334	29.5792	29.1846	29.4303	29.0774	29.1862	29.1472	29.3127	29.3874	29.2129	29.8438	29.3391	29.3203	29.275	29.6479	29.6378	29.6619	29.7163	29.6434	29.9887	30.0235	29.6258	29.6463	29.7057	29.784	29.3687	29.5614	29.7085	29.5782	29.9617	29.3998	29.3209	29.5268	29.3344	29.6375	29.7677	29.4771	29.6154	29.5502	29.8059	29.5381	29.6881	29.0064	29.6262
EIF3L_HUMAN	Eukaryotic translation initiation factor 3 subunit L	31.1546	31.3075	31.1669	31.2527	31.1364	30.9709	31.1872	30.9058	30.9567	31.041	31.0723	31.1173	31.0249	30.9411	31.2061	30.9403	30.95	30.9799	30.9109	31.1139	31.1192	31.1067	31.2635	31.0875	31.0971	31.1237	31.1514	30.9755	31.0778	31.0319	31.1875	30.9928	31.2211	31.0794	31.1206	31.09	30.8951	31.0432	31.0938	31.0892	31.4303	31.2562	31.2718	31.3451	31.1896	31.1067	30.8812	31.0575
EIF3M_HUMAN	Eukaryotic translation initiation factor 3 subunit M	30.3375	30.5171	30.2423	30.5738	30.5368	30.2502	30.2491	30.2861	30.369	30.4834	30.8514	30.2848	30.603	30.0156	30.3012	30.1195	30.2899	30.3038	30.4297	30.4519	30.3631	30.6212	30.5996	30.2409	30.4094	30.4065	30.5042	30.2069	30.3712	30.2171	30.0053	30.2832	30.4536	30.619	30.5694	30.4325	30.3037	30.3114	30.4285	30.374	29.895	30.3233	30.3322	30.4589	30.1221	29.999	30.3002	29.7752
ELAV1_HUMAN	ELAV-like protein 1	31.9164	31.9976	32.1953	31.7835	32.2345	31.8674	32.0002	31.6865	32.0907	31.9257	32.032	31.9775	31.4875	31.811	31.792	32.1663	31.9834	32.0315	32.0122	31.6847	31.9035	31.8253	32.0309	32.1606	32.1084	32.0361	31.8696	31.8923	32.1018	32.0369	31.9102	32.0881	31.8958	32.0005	31.8533	31.9137	32.3026	32.11	31.872	32.0099	31.9147	31.9351	31.9648	32.3142	32.006	32.0481	32.1347	31.9255
ELMO1_HUMAN	Engulfment and cell motility protein 1	26.5923	26.9825	26.9647	27.358	26.6878	NA	27.0113	27.0275	NA	26.729	27.3204	27.0475	NA	27.3438	NA	NA	26.604	NA	27.0241	27.2021	26.8744	27.3848	27.9883	27.2577	27.3092	27.1899	27.4594	27.8042	27.2932	27.5474	27.3221	27.59	27.6233	27.2134	27.287	27.2889	26.7581	27.0082	27.7986	27.3241	27.0278	26.9858	27.0918	26.641	26.7929	27.1308	26.8899	NA
ELMO2_HUMAN	Engulfment and cell motility protein 2	28.1446	28.1368	28.4949	28.3604	28.0931	27.898	28.2867	28.0477	28.4412	27.9154	28.4771	28.2619	28.4603	28.4302	27.3346	NA	27.7789	27.7565	28.723	28.0111	28.0029	28.444	28.1382	28.4364	28.3014	27.8891	28.3875	28.1413	28.1982	27.8342	28.346	28.047	28.0361	28.129	28.3008	28.1164	27.9715	27.9077	27.9376	27.8538	28.3119	28.305	28.4744	28.1166	28.2301	28.1345	28.3889	26.9932
ELOB_HUMAN	Elongin-B	28.299	28.1937	28.1131	28.1366	28.0281	28.0981	27.9167	28.2188	27.6954	27.6544	27.8827	27.991	27.9311	28.4653	28.2445	27.9264	28.4017	28.1746	28.3887	27.7889	28.0191	28.2738	27.7693	28.1499	28.0072	27.5159	28.2016	28.2499	27.968	27.8932	28.4015	28.1969	27.6925	28.2647	28.219	28.2606	28.0539	28.1405	28.2439	27.9554	27.843	27.995	27.8999	28.1933	28.1527	28.4971	27.3729	28.6037
ELOC_HUMAN	Elongin-C	29.3565	29.3493	29.5202	29.3647	29.3663	29.2651	29.7451	29.1219	29.2058	28.9836	29.3498	29.3703	29.3147	29.2531	29.3705	29.4462	29.174	29.3122	29.3412	29.3619	29.3159	29.4571	29.4845	29.6116	29.4746	29.4779	29.4469	29.6295	29.3461	29.3329	29.6195	29.443	29.2117	29.6607	29.4348	29.4562	29.3592	29.4164	29.7294	29.1768	29.5325	29.644	29.7606	29.5183	29.8415	29.5654	29.6674	29.5067
ELOV1_HUMAN	Elongation of very long chain fatty acids protein 1	28.9943	28.5876	29.1744	28.9537	28.983	29.2196	28.8271	29.2884	29.0678	29.529	29.298	29.359	29.308	29.2934	28.5905	29.171	29.083	29.3396	28.8558	28.9764	29.3032	28.9671	28.6632	28.9044	29.0104	29.0561	28.5932	28.983	29.3626	28.7742	28.8904	29.5398	29.633	28.8286	29.54	29.4083	29.1136	29.2601	29.3221	29.5339	29.6233	29.1571	29.159	28.9128	30.1713	29.1935	29.3879	29.2754
EM55_HUMAN	55 kDa erythrocyte membrane protein	28.0472	27.9387	28.0225	27.6683	28.0956	28.114	27.9804	NA	28.2886	27.9311	28.3793	27.979	27.7438	28.2378	27.2754	NA	28.1367	27.99	27.6369	27.7818	27.7799	27.9306	27.9847	28.0656	28.2785	28.0913	27.7953	28.0989	28.15	28.1438	28.3092	28.1999	28.2273	28.008	27.8928	28.1038	28.2083	27.9614	28.1089	28.1137	28.1134	27.84	27.8835	28.1015	28.082	28.137	27.8348	28.1008
EMAL4_HUMAN	Echinoderm microtubule-associated protein-like 4	28.2205	NA	27.5297	27.6145	NA	NA	NA	NA	27.155	27.5104	NA	NA	NA	NA	NA	NA	NA	27.401	NA	NA	27.3884	27.3559	27.1294	27.628	27.0117	27.3081	27.5557	27.4422	27.5686	27.1167	NA	27.2835	27.5644	27.3015	27.3093	27.4852	NA	27.2259	27.679	27.1325	27.813	28.093	28.0436	27.331	27.9722	27.9942	27.8247	28.1698
EMC1_HUMAN	ER membrane protein complex subunit 1	29.9798	29.8206	29.7744	29.8322	30.0845	30.2262	29.8985	30.1339	29.8754	29.995	29.7412	29.9749	30.1768	29.9673	29.7957	29.5675	30.1141	29.8421	29.6751	29.869	30.0997	29.9566	30.0238	30.2043	30.0907	29.9607	29.9647	29.9143	29.9658	29.9058	29.6856	30.0557	30.1376	29.6526	30.1306	29.8099	29.7557	29.972	29.9468	30.0218	30.0609	29.8211	29.9507	29.965	29.854	29.8853	29.9205	29.9054
EMC2_HUMAN	ER membrane protein complex subunit 2	28.0601	27.8693	27.9225	27.9475	28.3172	28.0271	28.2265	28.0451	28.3791	28.1305	28.116	27.9738	27.7823	28.5335	NA	NA	28.137	28.3452	27.7071	28.1805	27.7582	27.5943	27.7861	28.0919	27.895	27.9217	27.8514	27.8832	27.8519	27.63	28.06	27.6602	27.3007	27.7654	27.4918	27.8291	28.1851	27.7856	27.6451	27.6371	28.2928	27.6741	28.0442	28.0951	28.3027	28.3014	28.0809	28.0205
EMC7_HUMAN	ER membrane protein complex subunit 7	28.0372	27.4023	27.9238	27.5206	28.0642	28.2605	27.6427	27.8216	27.7266	28.0582	27.6973	27.8697	27.657	27.7356	NA	NA	27.813	27.4928	28.0268	27.707	28.0066	27.8579	27.9267	28.2447	27.8526	28.1738	27.7984	NA	NA	27.7985	28.3755	27.8091	27.9899	27.7307	28.1518	27.6243	28.0142	27.7339	27.8266	27.9987	27.9499	27.6627	27.6798	27.6733	27.7666	28.0377	27.7936	27.6071
ENOA_HUMAN	Alpha-enolase	35.4023	35.3778	35.5386	35.495	35.2596	35.1484	35.5123	35.4346	35.1132	35.2945	35.5242	35.2991	35.3305	35.4697	35.4319	35.3752	35.2587	35.2838	35.4654	35.3946	35.5081	35.6101	35.494	35.6201	35.4576	35.4873	35.5696	35.6919	35.3195	35.3806	35.5667	35.5124	35.3752	35.6342	35.6261	35.5667	35.2878	35.4365	35.659	35.4478	35.6301	35.7089	35.5576	35.5114	35.5718	35.4924	35.5885	35.511
ENOPH_HUMAN	Enolase-phosphatase E1	27.0743	27.2522	27.3649	27.2874	27.4594	27.3355	27.2533	NA	27.1669	27.5702	27.3922	27.5679	27.6515	NA	27.3606	NA	NA	27.3824	27.6542	27.9696	27.3213	27.9464	27.5368	27.3071	27.514	27.6826	27.3931	27.8741	27.6053	27.4466	27.0964	27.4253	27.6993	27.7474	28.1503	27.4332	27.3229	27.3939	27.4822	27.6672	NA	27.7135	27.2278	27.1077	26.9961	27.9585	26.9981	27.828
ENPL_HUMAN	Endoplasmin	36.1655	36.2338	36.1474	36.0452	36.1803	36.2263	36.1593	35.9777	36.2514	36.2168	36.2354	36.2074	35.978	36.0646	36.1181	36.3128	36.2792	36.182	36.1831	36.0502	36.2948	36.1808	36.377	36.3748	36.3097	36.4472	36.2471	36.3469	36.3737	36.428	36.4817	36.3648	36.26	36.2684	36.232	36.3277	36.4636	36.4069	36.2932	36.3694	36.3656	36.2545	36.4293	36.4023	36.5437	36.3036	36.3238	36.1772
EP15R_HUMAN	Epidermal growth factor receptor substrate 15-like 1	27.4722	NA	27.3246	27.4806	27.1788	27.3616	27.8765	27.8209	27.4526	NA	27.2648	26.7584	27.0475	NA	27.4741	NA	NA	27.4654	27.8261	27.2731	27.0137	27.1062	27.2544	27.3179	27.3301	27.3072	27.1324	27.2227	27.0417	27.2415	27.3582	27.0736	27.0729	27.0342	27.1501	27.2152	27.3149	27.1473	27.3183	27.1711	27.2575	26.8934	27.3086	27.255	27.5909	27.4191	27.2991	27.7549
EP300_HUMAN	Histone acetyltransferase p300	NA	27.1211	26.8001	26.0195	26.7894	27.2838	NA	NA	27.1765	27.3413	26.896	26.4749	27.3117	NA	NA	NA	27.5634	27.02	25.9524	NA	26.5856	26.1746	26.1472	26.3921	26.8386	26.5398	26.6016	26.4568	26.2998	26.0811	25.7363	26.1327	26.6923	26.1731	25.1367	26.1567	26.702	26.3913	26.266	26.5846	27.7058	26.7492	26.5826	26.4652	26.6554	26.8193	27.1716	NA
EPDR1_HUMAN	Mammalian ependymin-related protein 1	27.68	27.7975	27.7886	27.4184	27.6946	27.6901	28.1526	NA	27.6133	28.204	27.9173	28.1063	27.7517	27.9187	26.711	NA	27.8989	28.2232	28.104	27.9659	27.6036	28.0863	27.8749	NA	NA	27.0293	NA	NA	NA	NA	NA	NA	27.7835	NA	NA	27.7792	27.858	NA	NA	NA	27.8083	NA	27.652	27.954	NA	NA	NA	NA
EPN1_HUMAN	Epsin-1	27.706	27.6126	27.4274	27.6518	27.5387	27.1965	27.6239	NA	27.5541	27.5393	27.4305	27.6431	27.7083	27.4241	27.2147	NA	27.4815	27.6667	28.6195	27.5688	27.5477	27.4598	27.5925	27.721	27.6711	27.6046	27.3582	27.5177	27.6121	27.5257	27.3562	27.1426	27.6326	27.6728	27.0929	27.5108	27.6589	27.5263	27.7145	27.6094	27.1925	27.3605	27.2167	27.4236	27.4553	27.4371	27.0308	27.3896
EPN4_HUMAN	Clathrin interactor 1	28.4098	28.2567	27.9584	28.7359	28.658	28.2566	27.8422	28.1058	27.8394	28.0479	28.123	28.8177	28.3104	28.179	28.7689	28.2509	28.3506	28.7214	28.3284	28.6124	28.4128	28.4942	28.6856	28.4514	28.5392	28.201	28.3936	28.3085	28.7114	28.5647	27.2733	28.3734	28.2867	28.4004	28.4628	28.6192	28.553	28.5623	28.5236	28.343	28.68	28.486	28.5401	28.6529	28.2594	27.7233	28.5833	28.6049
EPS15_HUMAN	Epidermal growth factor receptor substrate 15	27.7884	27.8955	27.9719	27.8227	27.5072	27.5654	28.0144	28.4507	27.9146	28.0135	28.0763	27.9627	27.908	28.105	28.1507	NA	27.4883	27.5007	27.8436	27.7788	27.515	27.8413	28.2214	27.8744	27.7176	27.7824	27.8769	27.8915	27.6012	27.7825	27.6751	27.4805	27.9207	27.775	28.0054	27.9625	27.7512	27.5705	27.7911	27.7532	27.3955	27.6557	27.6538	27.654	27.6883	27.8503	27.9686	27.5192
ERAP1_HUMAN	Endoplasmic reticulum aminopeptidase 1	30.742	30.9853	30.8681	30.6118	30.6691	30.8434	30.7843	30.654	30.9771	30.6714	30.7338	30.7944	30.7665	30.639	30.8243	30.5784	30.9104	30.7218	30.6465	30.9425	30.9017	30.8419	31.0408	30.9925	30.8403	30.8229	30.8118	30.7002	30.8995	30.9349	30.9727	30.7824	31.0436	30.8763	30.6642	30.8856	30.9276	30.7625	30.7596	30.9116	30.8312	30.7825	30.8579	30.9746	30.7349	30.4565	30.5418	30.6546
ERF1_HUMAN	Eukaryotic peptide chain release factor subunit 1	30.2165	30.3835	30.569	30.5017	30.5041	30.1045	30.3267	30.1325	30.2363	30.1647	30.2973	30.3007	30.0491	30.235	30.1059	29.9781	30.1174	30.1024	30.2712	29.9513	30.4146	30.5084	30.2827	30.4182	30.4078	30.0866	30.1822	30.4048	30.1169	29.9406	30.2397	30.1099	30.1775	30.3983	30.1752	30.2485	30.0318	29.9964	30.3048	30.1592	30.4759	30.4306	30.3757	30.4532	30.0871	30.3672	30.2934	30.2446
ERF3A_HUMAN	Eukaryotic peptide chain release factor GTP-binding subunit ERF3A	29.6621	29.7387	29.8434	29.561	29.8349	29.7581	29.6704	29.6831	29.5578	29.6874	29.8942	29.6431	29.6897	29.7415	29.8944	29.4189	29.5373	29.7875	29.9436	29.6022	29.9905	29.9407	30.0085	30.0397	29.921	30.0291	30.1135	30.0061	30.0647	29.9071	29.655	29.99	30.0393	30.1455	29.9654	30.128	29.8317	30.067	30.0645	30.0045	29.5553	29.6876	29.6968	29.7301	29.6745	29.6938	29.6765	29.3498
ERG1_HUMAN	Squalene monooxygenase	28.0781	28.1687	28.297	NA	27.3859	28.5021	28.1896	27.5143	28.3013	28.4021	27.9719	28.0232	28.154	28.1155	28.0127	26.9172	27.7146	28.2533	28.0049	28.0269	28.5661	27.9963	28.2272	28.1731	28.106	28.1195	28.2226	27.987	28.2831	28.1991	28.2554	28.3567	27.8678	27.6964	28.0238	28.071	28.0773	28.3192	27.6437	28.0574	28.2958	28.1466	28.091	27.9807	28.5012	28.7567	28.4708	28.7516
ERG7_HUMAN	Lanosterol synthase	29.5643	29.5486	29.5159	29.4511	29.6101	29.8226	29.9256	30.003	29.4753	29.8072	29.4186	29.3192	29.6031	29.6962	29.8351	29.3617	29.555	29.6938	29.4372	29.5952	29.9844	29.3807	29.3186	29.3327	27.4744	29.3502	29.4083	29.1851	27.3876	NA	29.0841	29.2714	29.6628	29.2191	27.5242	28.764	29.481	29.1518	29.2255	28.7953	26.8415	28.8399	29.819	29.4684	26.5631	27.3366	26.6895	29.0011
ERGI2_HUMAN	Endoplasmic reticulum-Golgi intermediate compartment protein 2	NA	27.4963	NA	27.1768	27.4092	27.7182	27.3571	NA	27.6655	27.6232	27.6027	27.3079	27.5486	NA	NA	NA	27.3885	27.0434	27.4967	27.1515	27.1075	27.7146	27.599	26.6409	NA	27.4501	27.2029	27.6335	27.364	NA	27.9006	27.5095	27.5772	27.1233	27.4439	NA	27.339	27.6924	27.4134	27.7834	27.4912	NA	27.462	27.1848	27.6973	27.5511	27.6994	27.7061
ERH_HUMAN	Enhancer of rudimentary homolog	31.7116	31.7583	31.9143	31.635	31.7059	31.8331	31.7997	31.5239	31.8553	31.8418	31.7524	31.7337	31.6089	31.7523	31.8764	31.8231	32.0357	32.0254	31.5525	31.691	31.5606	31.6821	31.7548	31.8144	31.7309	31.7747	31.732	31.8382	31.9393	31.8958	32.1439	31.7883	31.7786	31.6177	31.5898	31.5843	32.2174	31.8139	31.5684	31.7357	32.187	31.8048	32.2073	31.9348	32.3332	32.0821	32.2157	32.1303
ERLN1_HUMAN	Erlin-1	27.5764	27.6913	27.5171	27.5994	27.5287	27.8196	27.7509	28.1357	27.976	27.8867	28.1505	27.5872	27.9157	28.3329	27.7575	27.1545	27.6105	27.9421	27.7203	27.9505	27.4496	27.8473	27.7455	27.7649	27.9127	27.7908	27.5748	27.8683	27.7464	27.6673	28.0022	27.9203	27.993	27.6205	27.6854	27.4914	27.4775	27.3015	27.7534	27.8229	28.5	27.6792	27.7601	27.5336	27.8919	28.0978	27.8357	27.3528
ERLN2_HUMAN	Erlin-2	32.5932	32.608	32.6742	32.4271	32.455	32.5403	32.3877	32.3959	32.6305	32.4213	32.4682	32.4508	32.4573	32.507	32.492	32.3192	32.4896	32.4558	32.5224	32.4127	32.4545	32.341	32.4783	32.4289	32.5294	32.4468	32.1936	32.4131	32.4061	32.2622	32.5422	32.5024	32.394	32.1781	32.2412	32.1251	32.3782	32.2503	32.242	32.3654	32.595	32.611	32.8112	32.6715	32.6391	32.5337	32.586	32.5716
ERMP1_HUMAN	Endoplasmic reticulum metallopeptidase 1	30.0413	29.8364	29.9713	29.8822	30.0308	30.2229	30.3139	29.8048	30.2188	29.9948	30.1794	29.7936	29.99	30.1849	29.5306	30.1606	29.8848	29.8871	29.9399	29.8981	29.971	29.8842	29.7926	29.9805	29.8056	29.9417	29.6097	29.8716	29.9333	29.8913	30.0044	30.3181	30.2407	29.5845	30.0428	30.1253	29.7556	29.9629	29.897	30.049	30.1247	29.7116	29.9826	29.8328	30.4442	30.0168	30.2776	30.2301
ERO1A_HUMAN	ERO1-like protein alpha	30.0486	29.9567	29.606	29.9096	29.9027	30.0816	30.1731	30.279	30.1967	30.1119	29.7765	30.1388	29.9084	29.7124	30.1831	29.9642	30.1684	29.986	30.0689	30.0292	30.0798	29.8303	30.1878	30.0013	30.0545	30.0728	29.9124	29.6897	30.0874	30.1906	29.8741	29.9478	30.0025	29.9464	30.1082	29.9012	30.1661	29.9906	29.8264	29.9713	29.5414	29.8988	29.7539	30.0016	29.5987	29.7279	29.7966	29.4589
ERP29_HUMAN	Endoplasmic reticulum resident protein 29	32.8974	32.9488	32.9583	32.7895	32.9145	32.9965	33.1355	32.9344	33.1717	33.0631	32.8695	33.0152	32.9505	33.1011	32.9492	32.9129	33.117	33.0519	32.9943	33.029	32.9752	32.9445	33.1927	33.0355	33.1272	33.1273	32.9174	33.0724	33.0297	33.0093	33.2879	33.1047	33.0639	33.1208	32.9014	33.0625	33.2573	33.0288	32.9684	33.0098	33.0355	32.906	33.1058	33.0631	33.1016	32.958	32.7818	32.9396
ERP44_HUMAN	Endoplasmic reticulum resident protein 44	32.7756	32.8648	32.6618	32.7322	32.8143	32.6088	32.5317	32.5524	32.9361	32.6917	32.5908	32.7201	32.4603	32.696	32.5917	32.6491	32.6522	32.6759	32.7699	32.5941	32.806	32.7002	32.938	32.8684	32.8608	32.817	32.648	32.6869	32.843	32.8427	32.8111	32.7776	32.9084	32.7608	32.6788	32.8251	32.8487	32.8466	32.7941	32.7742	32.8064	32.5894	32.7071	32.7696	32.8348	32.6816	32.6162	32.5715
ES1_HUMAN	ES1 protein homolog, mitochondrial	29.4308	29.1024	29.1523	29.1975	29.461	29.8152	29.3726	29.4149	29.7063	29.5616	29.6028	29.4735	29.2461	29.5503	29.2604	29.5347	29.4337	29.7432	29.6484	29.5664	29.4181	29.3539	29.3009	29.4978	29.6894	29.6767	29.6343	29.7186	29.6562	29.9265	29.6398	30.0307	29.6828	29.4862	29.8116	29.5995	30.0953	29.6679	29.6992	29.7895	29.3975	28.819	29.2748	29.3132	29.8371	29.7752	29.9448	29.523
EST1_HUMAN	Liver carboxylesterase 1	33.7995	33.9129	33.9603	33.8108	33.8875	33.87	33.9603	33.7396	34.1634	33.8669	33.8733	33.8198	33.7281	33.8907	33.8093	33.8689	33.9269	33.896	33.9175	33.7837	33.8903	33.8318	34.0684	34.0763	34.113	34.0612	33.9335	33.9072	34.006	34.0137	34.0264	34.0285	33.9415	33.9738	33.7976	33.8857	34.0717	33.9816	33.8756	33.9634	33.8541	33.7726	34.0155	33.9525	34.0514	33.9516	33.9884	33.9189
ESTD_HUMAN	S-formylglutathione hydrolase	30.4484	30.448	30.2916	30.5686	30.1957	30.1745	30.3421	30.5017	30.0313	30.3588	30.4471	30.439	30.4382	30.723	30.4774	29.8508	30.2711	30.2789	30.4429	30.3344	30.5641	30.6172	30.5083	30.4123	30.307	30.4722	30.534	30.3282	30.0517	30.2837	30.5166	30.4642	30.3166	30.5935	30.3307	30.524	30.2273	30.3827	30.5565	30.2141	30.3186	30.6925	30.379	30.5767	30.4023	30.7392	30.3847	30.6131
ESYT1_HUMAN	Extended synaptotagmin-1	32.7786	32.7279	32.7748	32.786	32.8532	32.9993	32.7139	32.9202	32.9329	32.9803	32.8871	32.9053	32.9681	32.9868	32.6765	32.5717	33.0368	32.8965	32.8255	32.8369	32.8463	32.78	32.8499	32.8087	32.8555	33.0459	32.8267	32.9377	33.003	32.8356	33.0556	33.1039	33.0586	32.8214	32.9044	32.7335	32.7774	32.9042	32.7155	32.8499	32.9129	32.7157	32.7724	32.7019	33.0466	33.0867	32.9405	33.0289
ESYT2_HUMAN	Extended synaptotagmin-2	31.6474	31.4674	31.7117	31.6809	31.868	31.8949	31.5589	31.8364	31.754	31.8451	31.8206	31.7976	31.7361	31.9625	31.7509	31.659	31.8391	31.825	31.6181	31.6297	31.6965	31.5122	31.5852	31.637	31.7168	31.8068	31.5245	31.7887	31.8284	31.6471	31.8009	31.8428	31.8654	31.5488	31.8024	31.6528	31.6519	31.6733	31.6851	31.8305	31.9386	31.5137	31.6251	31.4463	31.8422	31.8073	31.8293	31.6748
ETFA_HUMAN	Electron transfer flavoprotein subunit alpha, mitochondrial	32.2343	31.98	32.2865	32.0693	32.1512	32.6454	32.291	32.2563	32.385	32.4934	32.465	32.1686	32.1865	32.3075	32.0008	32.1722	32.3861	32.4189	32.4486	32.1267	32.1775	32.0006	31.9547	32.2877	32.3048	32.4094	32.0662	32.3541	32.4966	32.4437	32.48	32.4587	32.489	32.1983	32.3895	32.339	32.5355	32.2294	32.1837	32.3257	32.32	32.1914	32.0196	32.1268	32.5376	32.7952	32.7118	32.5204
ETFB_HUMAN	Electron transfer flavoprotein subunit beta	31.1847	31.0856	31.4629	31.1022	31.3432	31.5808	31.2371	31.1298	31.4746	31.463	31.4727	31.3251	31.1752	31.5022	31.2132	31.4573	31.5066	31.4221	31.2188	31.2647	31.3767	31.153	31.1317	31.3554	31.4901	31.5696	31.3186	31.5236	31.4539	31.5066	31.7707	31.6711	31.5236	31.251	31.4659	31.3846	31.6642	31.398	31.423	31.4052	31.4714	31.3914	31.27	30.9979	31.7116	31.659	31.9372	31.7129
ETFD_HUMAN	Electron transfer flavoprotein-ubiquinone oxidoreductase, mitochondrial	26.2255	NA	NA	26.0384	NA	26.7244	NA	NA	NA	26.6046	NA	NA	NA	NA	NA	NA	NA	26.1818	NA	NA	26.1383	25.9806	NA	26.5033	26.1176	26.4398	25.3214	26.2384	26.2721	26.3231	26.247	26.6802	26.7345	NA	26.3878	26.524	26.2579	26.3929	25.961	26.1567	26.2932	25.5173	NA	NA	26.6288	26.1783	NA	NA
ETHE1_HUMAN	Persulfide dioxygenase ETHE1, mitochondrial	30.3246	30.3731	30.5949	30.406	30.2899	30.7247	30.6284	30.3189	30.6415	30.5131	30.5177	30.4663	30.327	30.691	30.1788	30.5709	30.7511	30.5256	30.571	30.5496	30.5199	30.4582	30.2546	30.6247	30.55	30.8005	30.5466	30.6278	30.7063	30.4666	30.7655	30.829	30.607	30.5216	30.7169	30.5696	30.8001	30.6315	30.6955	30.6221	30.6275	30.7591	30.486	30.4401	30.9429	30.8893	31.019	30.7811
ETV6_HUMAN	Transcription factor ETV6	25.545	NA	NA	25.6134	25.8789	25.7585	NA	26.0427	24.6577	25.1659	24.7568	25.9667	25.3368	NA	25.4887	25.1018	26.253	25.8422	25.4118	NA	26.9319	25.461	25.4246	24.5342	24.6339	24.2013	25.0537	NA	25.709	25.837	NA	25.4042	25.5841	24.8874	26.5873	NA	25.9932	25.6344	24.9149	27.2208	NA	25.576	NA	26.7192	NA	25.222	NA	NA
EVI2B_HUMAN	Protein EVI2B	27.854	27.637	27.4607	27.4459	27.5743	27.4675	NA	26.872	27.8507	27.5492	27.8836	27.4126	NA	27.9047	NA	27.3422	NA	28.4213	27.8221	NA	27.3324	27.0738	27.2653	26.9637	27.4661	27.5316	27.5069	27.389	27.2146	27.4733	27.4875	27.4863	27.4	27.185	27.5476	27.4036	27.7519	27.1743	27.2057	27.1688	28.0271	27.1999	27.5668	27.5544	27.8194	27.7178	27.6994	27.4937
EVL_HUMAN	Ena/VASP-like protein	29.9668	29.737	30.1345	29.8489	29.8686	30.0645	30.0789	30.0816	29.3537	29.8975	29.6134	29.9617	30.049	30.0237	30.1702	30.1821	30.1612	29.888	29.8491	29.7307	29.4951	29.4604	29.292	29.6468	29.3565	29.2826	29.3807	29.5459	29.4546	29.3672	29.3518	29.4458	29.1921	29.1428	29.7444	29.3542	29.6571	29.482	29.7151	29.5019	29.7067	29.8073	29.6011	29.4692	29.6161	29.2015	29.6099	29.6187
EWS_HUMAN	RNA-binding protein EWS	29.9541	30.1618	30.095	29.9246	29.9556	29.9792	29.7325	29.873	30.023	29.9307	30.2829	29.7147	29.5715	29.9867	29.9017	30.2401	30.1919	30.1562	30.2937	29.9147	30.0003	30.1274	30.1836	30.0778	29.9432	30.0346	29.9299	30.0078	29.9383	30.1911	30.1752	29.9225	29.8274	30.1392	30.1403	29.8623	30.0263	29.9664	30.1878	30.0607	30.3835	30.2219	30.5283	30.2343	30.1823	30.2218	30.1722	30.1009
EXOC1_HUMAN	Exocyst complex component 1	28.8149	28.715	28.3617	28.7133	28.5599	28.9298	29.2079	29.402	29.2182	29.3793	28.819	28.5613	NA	28.0283	NA	NA	27.8643	29.0064	28.8577	28.7788	28.8768	29.1109	28.3882	28.8066	28.3277	29.0089	29.1731	28.752	28.8062	29.0552	28.8464	28.7734	28.6685	28.9328	28.36	28.8221	28.5619	28.7156	28.6284	29.0576	28.6295	28.2455	28.5416	28.4592	28.4677	29.1272	28.3407	28.5643
EXOC3_HUMAN	Exocyst complex component 3	26.7227	26.9557	26.8782	26.7943	26.3618	26.9312	26.8553	26.8359	27.0332	26.8777	26.3098	26.8136	27.152	26.8401	26.6615	NA	NA	26.4877	26.8176	26.2963	26.7701	NA	26.8693	NA	26.9688	26.4731	26.6705	26.8781	26.7774	26.5471	27.385	27.199	26.8451	26.9	27.0802	26.5627	26.1824	26.3695	26.6108	26.76	26.36	26.4316	26.8465	26.6168	26.7227	26.976	26.3377	27.0007
EXOC4_HUMAN	Exocyst complex component 4	28.7583	28.6878	28.2349	29.0763	29.1842	28.9633	28.3402	28.8765	28.8704	29.1073	28.4945	29.2449	29.1958	28.4013	29.2236	NA	28.969	28.7253	28.6651	28.9156	28.7223	29.2545	28.9827	29.0596	28.9447	28.8779	29.0806	28.9332	29.087	29.0549	28.4421	28.6699	29.0327	28.5793	29.0251	29.1186	28.8851	28.7743	28.7955	29.0751	28.4993	28.8324	28.562	28.7818	28.7946	28.4761	28.64	29.0723
EXOC7_HUMAN	Exocyst complex component 7	26.4553	26.7226	26.0587	26.915	26.5478	26.8919	26.3055	25.8885	26.252	26.9422	26.4527	26.3634	26.914	26.1056	NA	NA	26.0994	26.2309	26.1641	26.1447	NA	26.8154	26.6566	26.3394	26.6471	26.5822	26.8417	26.522	NA	25.8	26.0801	26.103	26.4933	26.4339	26.6747	25.768	NA	25.9494	26.1467	26.3974	NA	26.1159	26.323	26.4644	26.031	26.2528	26.2848	NA
EXOC8_HUMAN	Exocyst complex component 8	27.1919	27.5462	27.0118	27.7753	27.2877	27.4331	27.5667	NA	NA	NA	27.0767	27.6674	27.7485	27.3654	27.3849	NA	NA	27.5836	27.3814	NA	26.7676	26.6865	27.279	27.9356	27.2777	27.6801	27.0257	27.3166	27.6771	27.2405	27.143	27.2882	26.7832	27.2999	27.332	27.0822	26.8853	27.2499	26.8928	26.9614	26.9785	27.1919	27.2955	27.19	27.3264	27.3217	27.1495	27.0442
EXOS2_HUMAN	Exosome complex component RRP4	28.5682	28.3807	28.5096	28.4147	28.4594	28.2778	28.0733	28.2284	28.3441	27.9432	28.3187	28.5241	28.34	28.2272	28.3802	27.9413	28.3095	28.1946	28.1551	27.9497	28.2374	28.4931	28.6261	28.3972	28.7732	28.5627	28.3087	28.3398	28.4842	28.441	28.4894	28.5634	28.3237	28.4346	28.3288	28.3286	28.6267	28.5238	28.3969	28.3016	28.2705	28.0302	28.3999	28.5175	28.4559	28.5402	28.3299	28.5148
EXOS3_HUMAN	Exosome complex component RRP40	27.4186	27.7588	27.8441	27.6591	27.4684	28.0127	27.8307	NA	27.7867	NA	NA	26.9653	NA	27.5049	27.6326	NA	27.8545	27.6531	28.0988	27.7679	27.9929	28.1694	27.8957	28.0698	27.9678	28.0588	28.1303	27.8138	NA	27.9702	28.0087	28.1143	28.1009	27.8463	NA	28.0768	27.8631	27.8681	28.2021	27.9938	27.8241	27.876	27.9464	27.9931	28.0128	28.1162	27.9929	NA
EXOS4_HUMAN	Exosome complex component RRP41	28.169	28.2832	28.2629	28.2129	28.0831	28.4444	28.0319	28.0038	28.2062	28.669	27.9457	28.2022	28.1909	27.9751	27.6674	28.5108	28.3647	28.2864	28.0305	27.8588	28.2488	28.4174	28.4452	28.3113	28.4642	28.2234	28.1877	28.0987	28.4363	28.0542	28.42	28.3083	28.3911	28.328	28.1763	28.2333	28.5205	28.1205	28.1931	28.1534	28.2496	28.1977	28.3679	28.4338	28.5351	27.9633	28.2385	28.235
EXOS5_HUMAN	Exosome complex component RRP46	27.6573	28.3701	27.7384	27.7633	27.8289	27.9582	28.1725	27.772	28.1368	28.2318	27.7318	NA	27.4754	27.6568	NA	NA	27.7503	27.9832	27.6654	28.0789	27.5831	27.9641	28.0557	28.0557	28.0492	28.2208	28.0362	27.7866	28.0961	27.8568	28.0168	28.0172	27.9229	NA	27.0982	NA	28.2536	27.9707	27.6364	28.0147	27.6729	27.8618	27.734	27.9165	27.6486	27.9114	27.4344	27.5177
EXOS7_HUMAN	Exosome complex component RRP42	27.7963	27.8363	27.8252	27.7626	27.8237	27.5495	27.9574	28.0376	27.9849	27.8277	27.7908	27.7853	27.8603	27.7748	28.2684	27.8897	27.8974	28.1853	27.9922	27.9048	27.6286	27.746	27.8915	27.7645	26.9719	28.1302	27.9275	27.7459	27.9621	27.655	27.7728	27.9515	27.9125	27.6118	28.0179	27.8212	28.2415	27.8247	NA	27.8804	27.7784	27.3971	27.6151	27.8593	27.9575	28.021	28.3076	27.7993
EXOS9_HUMAN	Exosome complex component RRP45	27.5557	26.9364	25.8514	27.9384	27.5761	26.9277	NA	26.9566	27.2559	26.754	NA	27.3339	26.9446	26.6339	27.7391	26.8236	27.543	27.4379	NA	26.8356	28.6059	27.6594	27.6354	27.1334	27.4417	27.6716	28.0117	26.6671	27.9694	27.9664	NA	27.2732	28.1132	27.7925	27.2904	27.6742	27.6177	27.7209	28.0295	27.7932	26.372	27.4417	27.2136	27.7228	26.6644	27.4863	26.2523	26.5389
EXOSX_HUMAN	Exosome component 10	27.9633	27.7081	27.5656	27.5886	28.0937	27.9361	27.8895	27.9341	27.638	27.94	27.6583	28.0346	28.0262	28.0729	28.0213	27.8678	27.6986	27.9503	27.9319	27.8987	28.0231	28.0728	27.9356	28.0737	27.9704	27.9125	27.7621	27.7376	28.2325	28.1438	28.0983	27.9444	28.1264	27.3851	27.8776	27.983	27.4645	28.0559	27.8461	28.0418	28.1951	27.1975	27.6763	27.8347	27.1533	27.8363	26.9087	27.8431
EZRI_HUMAN	Ezrin	32.1448	32.0429	32.1319	32.1666	32.0265	31.8884	32.1328	32.1364	31.8878	32.0287	32.2325	32.0495	32.2092	32.2246	32.1449	32.006	31.9964	31.9889	32.1978	32.2093	32.1346	32.2615	32.0465	32.1708	32.0013	32.152	32.1616	32.2556	32.035	32.0813	32.2774	32.0554	31.9952	32.0819	32.2754	32.3457	32.0623	32.1082	32.1973	32.2003	32.1902	32.1914	32.1067	31.9447	32.1631	31.8023	32.1313	32.2322
F10A1_HUMAN	Hsc70-interacting protein;Putative protein FAM10A5;Putative protein FAM10A4	31.2905	31.4684	31.5189	31.228	31.2717	31.2736	31.2794	31.1308	31.0996	31.3768	31.1781	31.2247	31.0955	31.5165	31.3193	31.3499	31.1345	31.3908	31.3664	31.0996	31.584	31.4525	31.6377	31.6878	31.593	31.6324	31.4711	31.7276	31.4588	31.6254	31.7163	31.6425	31.4133	31.6093	31.6468	31.5932	31.3942	31.4436	31.8246	31.6014	31.6634	31.5538	31.588	31.4566	31.6762	31.8053	31.7301	31.6183
F1142_HUMAN	Protein FAM114A2	27.1974	27.669	27.3825	27.3422	27.0025	26.715	27.4861	27.3012	27.3471	26.9816	27.4134	26.9783	27.1641	27.3924	27.393	NA	27.2982	26.8163	27.3478	27.2706	NA	27.5611	27.3835	27.4558	27.4451	27.2177	27.7163	27.2386	27.2925	27.0169	27.618	26.9866	26.8001	27.2589	27.4403	NA	27.0681	27.1938	27.6378	27.2523	26.7708	27.2488	26.8844	27.1063	26.9553	27.5461	26.7456	27.2402
F120A_HUMAN	Constitutive coactivator of PPAR-gamma-like protein 1	28.5175	28.6773	28.4508	28.5958	28.2975	28.5004	28.6565	28.3636	28.9726	28.0014	28.5648	28.4214	28.5005	28.3482	28.2056	28.4223	27.9669	28.1168	28.1008	28.7282	28.4778	28.5834	28.3023	28.4343	28.3417	28.1891	28.3383	28.8546	28.3287	28.2496	28.5711	28.2492	28.4138	28.5522	28.5713	28.5812	28.6982	28.7695	28.4912	28.5278	29.3588	28.9311	28.9354	28.7079	28.8882	28.4511	28.8782	NA
F136A_HUMAN	Protein FAM136A	27.8515	28.1706	28.2065	28.08	27.9672	28.2115	28.0601	27.9694	28.2058	28.0736	28.2391	27.7388	28.1441	28.2215	28.0997	28.23	28.2004	28.1701	27.7183	28.253	27.9817	28.0384	27.7958	28.3428	27.9228	27.6416	27.2455	27.9416	27.8096	28.0315	28.2326	27.8925	28.0162	27.8723	28.0386	27.999	28.378	28.0726	27.8839	28.2251	28.1153	28.0772	28.2475	27.847	28.2324	27.7064	28	27.9581
F16P1_HUMAN	Fructose-1,6-bisphosphatase 1	26.5715	27.392	27.857	27.1271	26.8731	27.1897	28.051	28.137	27.3848	27.2714	27.7928	27.0865	27.4792	27.2727	27.4332	NA	27.1538	26.9834	NA	26.8336	NA	26.4367	26.9874	26.8661	26.1236	26.6534	NA	27.6784	27.6306	26.2974	26.8081	26.8956	NA	NA	26.7339	26.9206	27.4283	27.1679	27.0546	27.2464	27.4172	26.9855	26.5161	26.7981	27.4927	27.6613	27.2406	27.6327
F213A_HUMAN	Redox-regulatory protein FAM213A	27.2523	27.6083	27.78	27.3523	27.4378	27.54	27.7275	27.2609	27.7814	27.5159	27.6158	27.6178	27.6393	27.6214	27.2503	NA	27.2207	27.6059	27.2229	27.2348	27.7282	27.5079	27.4933	27.7623	27.5466	27.5536	27.5884	27.4865	27.583	27.687	27.637	27.8017	27.4209	27.4889	27.598	27.6132	27.5421	27.5277	27.9136	27.6954	27.0418	27.0687	27.2237	27.6781	27.2432	27.35	27.1863	27.5984
FA49B_HUMAN	Protein FAM49B	31.2495	31.0585	31.2331	31.293	31.0442	30.9209	31.1812	31.1447	30.9045	30.8796	31.2235	31.1102	31.1562	31.3759	30.9975	30.9542	31.0467	31.1743	31.1797	31.1582	31.141	31.122	31.0464	31.0174	30.9434	30.9627	31.1871	31.2605	30.812	30.9	31.1962	30.9966	30.9015	31.1342	31.1599	31.121	30.8716	31.0658	31.187	31.076	30.998	31.2025	31.0563	30.8733	31.0304	31.1397	31.2296	31.2424
FA98A_HUMAN	Protein FAM98A	27.3894	26.9784	27.1296	27.6464	27.6433	26.9355	27.22	26.8538	27.2757	26.6938	26.9724	27.449	27.0411	27.0821	NA	NA	27.0748	27.1415	27.1383	26.9047	27.5396	27.6968	27.5466	27.2117	27.0611	27.2481	26.9872	27.2395	27.118	27.3241	27.3256	27.3014	27.0374	27.5715	26.9351	27.4767	26.9606	27.5312	27.2377	27.1404	27.0288	27.0784	27.3891	27.1834	27.4224	26.7871	27.0178	NA
FA98B_HUMAN	Protein FAM98B	28.0112	26.9392	27.0446	27.9391	27.7717	27.5603	27.8322	27.5261	27.8944	27.6695	27.5516	27.6304	27.7674	27.5312	27.5878	NA	27.9471	NA	27.5898	27.6992	28.0493	27.8813	27.9686	27.8428	27.6382	27.8591	27.5776	27.7741	27.7822	27.8832	27.7498	27.88	27.7484	28.1254	27.4209	27.9115	27.8037	27.8201	27.5896	27.8674	27.9173	27.6879	27.2566	28.0069	27.9056	27.766	27.8696	27.4542
FAAA_HUMAN	Fumarylacetoacetase	29.2915	29.3516	29.3283	29.2821	29.312	29.3741	29.4846	29.637	28.9067	29.2555	29.3484	29.1272	29.5615	29.6703	29.5817	29.3947	29.4154	29.1415	29.7306	29.4505	29.4579	29.591	29.439	29.5375	29.4673	29.4699	29.4226	29.6432	29.2046	29.3363	29.5562	29.4833	29.3681	29.6214	29.2685	29.5351	29.2548	29.0025	29.5286	29.4365	29.1329	29.4762	29.1895	29.3232	29.0275	29.3094	29.5227	29.4958
FABP4_HUMAN	Fatty acid-binding protein, adipocyte	32.8363	32.6541	32.8831	32.8576	32.555	32.6669	33.1179	33.124	32.5968	32.5403	32.9444	32.7355	33.037	33.2223	33.0326	32.7102	32.8046	32.6452	32.8514	32.9438	33.0736	33.1213	32.8178	33.064	33.0164	32.9625	33.0879	33.3101	32.7923	32.8386	33.0159	33.1609	32.9835	33.1762	33.1718	33.1577	32.764	32.8873	33.2622	33.022	33.0784	33.0612	32.9891	32.8448	33.1157	32.9885	33.2283	33.0889
FABP5_HUMAN	Fatty acid-binding protein, epidermal	34.4436	34.3638	34.5454	34.5072	34.273	34.2177	34.5147	34.4495	33.9911	34.2537	34.629	34.2227	34.347	34.4144	34.6121	34.648	34.4094	34.3329	34.714	34.4889	34.6513	34.8459	34.5564	34.6866	34.41	34.4345	34.7346	34.84	34.3728	34.4899	34.6393	34.5772	34.478	34.8763	34.7111	34.6833	34.4701	34.6274	34.8731	34.6191	34.9069	34.9902	34.7227	34.8094	34.7141	34.9098	34.9841	34.6928
FACE1_HUMAN	CAAX prenyl protease 1 homolog	32.8616	32.6541	32.4973	32.8768	33.0867	33.0207	32.6147	33.1004	33.0089	33.0878	32.8058	33.2099	33.0088	32.7104	32.6341	32.7874	32.9116	32.8704	32.8055	32.8541	33.0183	32.8329	32.8787	32.7991	33.0501	33.0573	32.8341	32.7296	33.0911	32.9686	33.0314	33.0949	33.2078	32.8036	33.0916	33.0071	32.8548	32.9852	32.9715	33.0966	32.9098	32.8162	32.7633	32.8205	32.8816	32.8832	32.8311	32.7844
FACR1_HUMAN	Fatty acyl-CoA reductase 1	28.24	28.0593	27.9312	27.4996	27.891	27.9682	27.7706	NA	27.8648	27.8008	28.0871	27.4893	27.8547	27.9515	28.0868	27.9964	28.0004	27.6992	27.6405	28.0744	27.9398	28.0929	28.3999	28.0382	27.9677	28.0857	27.8392	27.7596	27.9578	28.0463	28.1488	28.0254	27.764	27.6894	27.5532	27.6455	27.9594	27.9924	27.8848	28.1853	28.2529	28.2546	27.8792	28.1766	28.4799	28.553	28.2386	28.0145
FACR2_HUMAN	Fatty acyl-CoA reductase 2	28.1178	27.9352	28.2219	27.9098	28.5405	28.0671	27.6819	27.9985	28.0699	27.8385	28.1902	28.4217	28.1948	27.8855	27.8338	27.7928	28.2825	28.2669	28.2361	27.7387	28.4825	27.8596	28.3997	28.8528	28.5443	28.4807	28.6016	28.1268	28.3759	28.6564	28.7349	28.4302	28.4576	28.3975	28.4564	28.1061	28.5237	28.5565	28.3167	28.3803	28.512	28.6436	28.543	28.4927	28.5245	28.5754	28.3696	28.5801
FAD1_HUMAN	FAD synthase	27.0501	27.0221	27.3438	27.2624	27.0761	27.2584	28.0809	27.7312	27.4004	27.6358	26.2893	26.7269	27.2916	27.7416	27.8426	NA	26.7807	26.661	27.1771	27.3968	27.5741	27.2068	27.3222	27.5004	27.7042	27.5422	27.5378	27.5125	27.4668	27.398	27.2699	27.515	27.6395	27.4172	NA	27.583	27.6441	27.3975	27.1626	27.5122	27.2725	27.1148	26.8813	26.4902	26.7871	27.3258	27.1976	27.4539
FAF1_HUMAN	FAS-associated factor 1	28.0032	28.2359	28.1706	28.39	27.96	27.9191	27.9701	28.0246	27.3745	27.7808	28.3652	27.7201	27.8556	27.72	28.1741	27.3581	27.8313	27.5833	27.9816	28.0821	28.2861	28.0521	28.1044	28.4447	27.974	27.9403	28.2438	28.1469	28.2216	28.3095	28.2333	28.3525	28.0904	28.2107	27.9468	28.2126	27.9774	28.0205	28.2403	28.2591	27.9858	28.0427	28.1708	28.0563	28.0259	28.2275	27.9656	27.6989
FAF2_HUMAN	FAS-associated factor 2	29.3988	29.5038	29.519	29.2838	29.3517	29.7413	29.6996	29.6236	29.5535	29.6608	29.9084	29.5083	30.1223	29.5937	29.2368	29.13	29.3586	29.6682	29.3434	29.7308	29.4756	29.193	29.2889	29.2725	29.3557	29.4819	29.1113	29.6105	29.5893	29.3086	29.6565	29.4531	29.593	28.9754	29.6185	29.1548	28.981	29.5192	29.2275	29.305	29.7702	29.2509	29.2616	29.1032	29.6363	29.7078	29.8564	29.5933
FAHD1_HUMAN	Acylpyruvase FAHD1, mitochondrial	27.5802	27.461	27.9805	27.5359	28.3462	28.4188	27.9844	28.292	28.2251	28.4585	28.2312	27.8558	28.0321	27.964	27.5152	NA	27.8042	28.4441	27.9185	28.0129	27.8575	27.8397	NA	28.0958	28.2203	27.9763	27.8184	27.7483	27.8022	28.1448	28.2341	28.0205	27.9102	NA	28.0004	28.0178	28.2538	28.1756	27.3904	28.2634	27.5121	27.5	27.4406	27.5513	28.2972	28.1031	28.0198	27.6753
FAK2_HUMAN	Protein-tyrosine kinase 2-beta	27.7567	28.2811	28.0917	28.4812	28.1801	27.1115	28.0668	28.2068	27.7585	27.837	27.2134	28.0546	27.7861	27.4552	28.2544	NA	27.7984	NA	28.0689	28.1428	27.8852	28.3549	27.9477	27.9811	27.7376	27.8034	28.1345	28.179	27.9189	28.2934	28.3669	27.6888	27.6284	28.0037	27.6449	27.7641	27.6703	28.128	27.724	27.9692	27.8764	28.1296	28.0772	28.1012	NA	28.3171	27.9295	27.9653
FAM3C_HUMAN	Protein FAM3C	28.5643	28.6565	28.7312	28.4497	28.7568	28.589	28.7737	28.4939	28.6929	28.4007	28.6527	28.6674	28.8249	28.814	28.4812	28.4876	28.0261	28.6681	28.5698	28.1879	28.3777	28.6027	28.5576	28.7166	28.6662	28.6114	28.4939	28.5489	28.484	29.0195	28.5968	28.7214	28.9235	28.516	28.6965	28.7943	28.7013	28.6197	28.5126	28.7737	28.6992	28.5489	28.3959	28.339	28.8432	28.9454	28.8623	28.3684
FANCI_HUMAN	Fanconi anemia group I protein	26.2527	28.4761	26.8713	26.1617	26.9453	26.5477	26.6342	27.1836	26.8231	26.7096	26.5738	26.6799	27.2424	26.7388	27.7236	26.1031	26.053	26.5026	26.5231	26.4681	28.1655	27.81	27.2139	27.0378	27.201	27.1892	26.1024	26.0487	26.71	27.1407	25.5236	26.9442	27.1946	26.5369	26.8618	26.7801	26.173	26.6922	26.8727	27.2987	26.2235	26.8454	26.2638	27.0713	26.6749	26.4006	25.5822	27.6794
FAS_HUMAN	Fatty acid synthase	33.5865	33.5254	33.5759	33.6952	33.5195	33.2999	33.5475	33.5279	33.1978	33.3559	33.443	33.4702	33.4992	33.4695	33.5675	33.1979	33.17	33.2814	33.5354	33.4738	33.6032	33.7751	33.5817	33.6036	33.4829	33.5361	33.7032	33.5597	33.3898	33.4471	33.4625	33.5184	33.4888	33.6776	33.6542	33.6388	33.2942	33.5065	33.653	33.5318	33.546	33.6416	33.558	33.6223	33.439	33.477	33.503	33.4235
FBRL_HUMAN	rRNA 2-O-methyltransferase fibrillarin	31.274	31.4471	31.476	31.3597	31.6199	31.4086	31.2815	31.3394	31.2467	31.3176	31.489	31.2493	31.3568	31.262	31.0889	31.5796	31.4893	31.3614	31.3027	31.291	31.5985	31.6973	31.6764	31.6049	31.8326	31.872	31.4863	31.8884	31.842	31.8116	31.7528	31.689	31.745	31.811	31.6551	31.6445	31.9866	31.8178	31.6905	31.7142	31.6698	31.6841	31.4878	31.6301	31.6171	31.7312	31.7859	31.8308
FCERG_HUMAN	High affinity immunoglobulin epsilon receptor subunit gamma	29.8169	29.756	29.8896	29.8655	29.9658	29.9959	30.0212	30.0238	29.9004	30.0428	29.8447	29.984	29.8294	30.1101	29.9028	30.0981	30.2175	30.279	29.7389	30.0916	29.7869	29.679	29.5154	29.6269	29.8365	29.6787	29.2562	29.9777	29.7337	29.6768	30.1919	29.7648	29.7156	29.1779	29.7628	29.7556	29.869	29.658	29.6397	29.5478	30.5218	29.817	30.324	29.7957	30.7584	29.9901	30.3703	30.4555
FCGRN_HUMAN	IgG receptor FcRn large subunit p51	29.3695	29.4701	29.175	29.3703	29.6742	29.4306	29.0261	29.3293	29.7864	29.444	29.2938	29.6154	29.6475	29.1399	29.0143	29.2926	29.4246	29.6169	29.1409	29.4104	29.2439	29.414	29.4495	29.3585	29.6852	29.5153	29.3925	28.4563	29.3299	29.4329	29.0448	29.3854	29.9981	29.4461	29.4615	29.5146	29.575	29.3162	29.4626	29.5225	29.2003	29.482	29.1837	29.5435	29.2812	28.6656	28.9362	28.8972
FCHO2_HUMAN	F-BAR domain only protein 2	27.3963	27.5653	27.4824	27.3106	26.9649	NA	27.4882	NA	27.3364	27.558	27.0526	26.9581	27.4421	27.2843	27.7956	NA	27.4118	27.048	27.3129	NA	27.0279	27.1079	27.1975	27.2984	27.4563	27.2371	26.7249	27.1561	27.248	27.2826	27.2226	27.1634	NA	27.4633	26.9005	27.3127	27.208	26.9892	27.2802	27.3703	26.9333	27.4585	27.0481	27.1807	27.3181	27.4509	27.1231	27.3763
FCL_HUMAN	GDP-L-fucose synthase	27.7355	27.4713	26.0695	27.4637	27.5226	NA	27.3438	27.388	26.8675	NA	27.6476	27.5396	NA	27.5288	NA	NA	27.6341	26.8819	27.3298	NA	27.2377	27.5933	27.5353	27.0302	27.4245	27.8501	27.6115	27.4812	27.4763	NA	NA	27.2123	27.2031	27.6118	27.3119	27.7658	NA	27.5563	27.7708	27.7357	27.5516	27.6173	27.5509	27.6255	27.2851	27.3857	27.28	NA
FDFT_HUMAN	Squalene synthase	28.6429	28.3775	28.6601	28.3619	28.2974	28.6145	28.3748	28.6519	28.3081	28.5519	28.834	28.6846	28.5767	28.3532	28.2943	28.046	28.0589	28.3917	28.1752	28.4088	28.6574	28.676	28.4923	28.5322	28.6822	28.136	28.1435	28.3772	28.4751	28.1388	28.434	28.532	27.8523	28.2009	28.3446	28.033	28.1824	28.5801	28.4714	28.5779	28.6313	28.2285	28.4743	28.3465	28.6267	28.5906	28.3549	28.7047
FEN1_HUMAN	Flap endonuclease 1	28.9828	28.9175	28.7401	28.8894	28.764	28.6304	29.1735	29.0951	28.7757	29.1124	29.2957	28.8482	29.1749	28.9882	29.0115	28.4046	28.7512	28.781	28.8956	29.1314	28.8477	28.8952	28.6033	28.974	28.5766	28.8192	28.8435	29.1191	28.8928	28.8274	28.962	28.9298	28.3175	28.7567	29.0148	28.6818	28.4618	28.6578	28.9968	28.8935	28.8604	28.9161	29.0373	28.709	28.9839	28.8097	29.2377	28.8431
FERM2_HUMAN	Fermitin family homolog 2	28.2235	27.7276	27.5568	27.8875	27.7227	27.0034	27.8187	28.1494	27.3674	28.2869	27.552	28.2538	28.2078	27.6417	28.0104	NA	27.6058	27.4512	27.8795	28.2483	28.3701	27.6869	27.761	27.5728	28.008	27.6847	27.2897	27.6019	27.5853	26.7172	27.3739	27.4265	27.5311	27.5722	27.655	27.8801	27.4133	27.2344	27.8869	27.6512	27.5978	27.3438	27.3303	26.9745	27.1139	27.6659	27.4053	27.7813
FGD3_HUMAN	FYVE, RhoGEF and PH domain-containing protein 3	26.8612	27.3459	26.8797	27.2683	27.0993	27.3835	27.2344	27.4911	27.3841	27.5895	NA	27.1736	27.1659	27.2529	28.0388	NA	NA	27.4917	27.1307	27.3627	27.8335	27.2917	27.9783	27.5823	27.8555	27.4061	27.5764	27.4659	27.1911	27.4604	27.1067	27.8226	27.5331	27.5544	27.4948	NA	27.6255	26.9986	27.6944	27.6534	NA	27.4179	26.6046	27.1202	27.0476	26.7923	26.3705	NA
FHOD1_HUMAN	FH1/FH2 domain-containing protein 1	28.2001	28.0592	27.8681	27.985	27.9231	27.6835	28.2379	28.1476	27.8604	27.5859	28.2786	27.8281	28.4101	28.336	27.7272	NA	27.507	27.9016	28.1192	27.7849	27.8033	27.8272	28.2344	27.7371	27.9765	28.0713	27.9982	27.9512	27.9241	28.0266	28.1157	27.9385	28.0147	27.7398	27.8301	28.1053	27.7271	27.5979	28.0256	28.1378	27.7286	28.1116	27.9385	27.8335	28.2465	28.3639	27.8217	28.3928
FIP1_HUMAN	Pre-mRNA 3-end-processing factor FIP1	28.9472	28.9643	29.2175	28.9462	29.1848	29.3658	28.8786	28.8909	29.5908	29.0878	29.1251	29.1192	28.9224	28.9881	28.9176	29.2617	29.0312	29.2621	28.884	28.9541	28.5574	28.8719	28.7935	29.0232	28.7853	28.9627	28.7438	29.0714	29.1174	28.9513	29.2625	28.7068	29.1269	28.8459	28.7746	28.7296	29.3708	29.0578	29.0602	28.294	29.2123	28.8571	28.9082	28.9693	29.2009	29.1436	29.1209	29.3816
FIS1_HUMAN	Mitochondrial fission 1 protein	28.6348	28.8294	28.8016	28.6215	28.5529	28.7688	28.7159	28.772	29.0182	28.7032	28.9351	28.577	28.9822	28.7322	28.7076	28.1679	28.3786	28.9694	28.7542	28.9141	28.7843	28.5649	28.8586	28.8217	28.6462	28.9489	28.444	28.7688	28.8179	28.5489	29.1452	28.6496	28.656	28.9351	28.6109	28.7283	28.9423	28.7516	28.895	28.7069	28.803	28.7827	28.8215	28.2613	28.7286	28.9968	28.3179	28.9876
FKB15_HUMAN	FK506-binding protein 15	28.973	29.2359	29.1848	29.1801	29.1079	28.9947	29.2207	28.8845	29.1889	28.9885	29.4377	28.9544	29.1145	29.2467	28.9363	28.7464	28.8935	29.1158	29.3465	29.1079	28.9191	29.0752	29.2213	29.0793	29.0503	29.0461	29.091	29.0318	28.7754	29.0339	28.8831	29.0213	29.0708	29.2312	29.123	29.1721	28.9734	28.936	29.2605	29.0924	28.9991	29.2992	29.0894	29.2427	28.858	29.0212	29.0914	28.6647
FKB1A_HUMAN	Peptidyl-prolyl cis-trans isomerase FKBP1A	29.0456	29.1016	29.2591	29.296	29.1185	28.9019	29.3643	29.2771	28.9038	29.1727	29.1951	28.9818	29.1267	28.8654	29.223	29.2628	28.8351	28.9841	29.1306	29.3599	29.6099	29.6468	29.5604	29.512	29.4134	29.3371	29.4713	29.4858	29.2355	29.3632	29.3556	29.6009	29.4603	29.6573	29.6946	29.671	29.3003	29.6822	29.6707	29.4378	29.2596	29.7047	29.2628	29.4563	29.3255	29.0314	29.5698	29.0771
FKBP2_HUMAN	Peptidyl-prolyl cis-trans isomerase FKBP2	30.3116	30.126	29.9442	30.1766	30.1413	30.2754	29.7788	30.1461	30.214	30.4033	29.6832	30.4503	30.3318	30.0046	30.195	30.298	30.3577	30.1778	30.3358	29.9712	30.4498	30.3468	30.6534	30.4784	30.4536	30.4279	30.3596	30.2289	30.65	30.5806	30.3719	30.3668	30.4039	30.4298	30.4542	30.4758	30.6034	30.4199	30.5563	30.2858	30.208	30.1865	30.4336	30.3518	30.2619	30.1872	30.008	30.104
FKBP3_HUMAN	Peptidyl-prolyl cis-trans isomerase FKBP3	28.3839	29.0607	28.5529	28.7389	28.3414	28.5985	28.6183	28.472	28.5379	28.5506	28.435	28.6557	28.5171	28.3007	28.6139	28.0159	28.6157	28.4868	28.5773	28.991	NA	28.7707	28.5691	29.1037	28.4703	28.5049	27.5062	28.7304	28.527	28.7309	NA	NA	28.8322	28.9496	28.9771	28.8739	28.5223	28.7921	28.8471	28.7222	28.8001	28.7261	29.1427	28.7503	28.9158	28.5445	28.3755	28.5619
FKBP4_HUMAN	Peptidyl-prolyl cis-trans isomerase FKBP4	29.706	30.158	30.1027	29.9244	29.9539	29.7195	30.2224	30.0358	29.4446	29.8649	29.8433	30.006	29.8846	30.1962	29.9304	30.3135	29.9116	29.8011	30.0557	29.7071	29.8205	30.0343	29.8309	29.948	29.9354	29.9038	30.1683	30.2957	30.249	30.0753	30.4031	30.0515	29.8667	30.3597	30.0728	30.1309	29.8823	29.9043	30.0821	30.0521	30.2006	30.2938	30.2885	30.0528	30.3484	30.4982	30.5658	30.1245
FKBP5_HUMAN	Peptidyl-prolyl cis-trans isomerase FKBP5	28.9116	28.8919	29.209	29.1509	28.7022	28.877	28.7156	28.9153	29.1447	28.7873	28.6822	29.1059	28.8944	28.7511	28.8675	28.9046	28.8784	28.6728	28.822	28.8219	28.6171	28.7385	28.7322	28.752	28.8138	28.659	28.5464	28.8307	28.8484	28.6755	29.1314	28.447	28.4584	28.7525	28.5124	28.5393	28.9899	28.5354	28.7534	28.6824	28.8454	28.9557	29.3558	28.7521	28.6726	28.4387	28.9185	28.9234
FKBP8_HUMAN	Peptidyl-prolyl cis-trans isomerase FKBP8	29.299	29.0303	29.3239	29.0073	29.224	29.0373	28.8683	29.0089	29.0899	28.6482	29.0241	29.2968	28.9018	29.3278	28.57	29.1587	28.7558	29.0175	29.1907	28.9579	29.1649	29.148	29.053	29.2199	29.0199	29.2209	28.9399	29.0628	29.2832	29.295	29.3303	29.2764	29.2025	28.9017	28.9783	28.969	29.2182	29.1239	29.0499	29.2787	29.2613	29.0017	29.2235	29.2106	29.5394	29.1861	29.2515	29.2911
FKBP9_HUMAN	Peptidyl-prolyl cis-trans isomerase FKBP9	29.039	28.7571	29.3587	28.9576	28.6534	28.8496	29.2006	28.9456	29.202	28.7823	28.605	28.8298	26.9108	28.6623	NA	29.38	28.6637	27.4756	NA	NA	29.5218	29.1001	29.2677	27.5848	28.5659	29.0295	28.9353	28.3968	28.961	28.8524	29.4271	28.8923	27.9955	28.2145	NA	NA	28.851	29.0344	NA	29.2484	28.3827	28.4743	28.7137	29.0831	28.8598	25.7862	29.17	28.1007
FLII_HUMAN	Protein flightless-1 homolog	29.3772	29.4263	29.7654	29.5979	29.3917	29.2395	29.5731	29.4552	29.2812	29.3483	29.5657	29.3986	29.5433	29.47	29.2779	NA	29.0314	29.1306	29.4927	29.2873	29.5841	29.7419	29.605	29.6539	29.2846	29.3688	29.4318	29.4777	29.312	29.3615	29.6398	29.2724	29.5131	29.3526	29.3927	29.4721	29.0328	29.3405	29.4109	29.4808	29.41	29.4062	29.5609	29.2907	29.47	29.3739	29.408	29.5671
FLNB_HUMAN	Filamin-B	30.2723	30.5461	30.4029	30.0966	30.3037	30.1634	30.1931	30.4938	30.2713	30.0095	30.1489	30.0757	30.2369	30.4144	30.387	29.0152	30.1581	30.2849	30.3404	30.2606	30.4327	30.4769	30.3119	30.4171	30.575	30.3321	30.292	30.3266	30.2258	30.1755	30.2358	30.3859	30.3787	30.3082	30.553	30.3621	30.2231	30.3383	30.45	30.3244	30.1276	30.1757	30.3327	30.624	30.3923	30.1926	30.2578	30.0809
FLOT1_HUMAN	Flotillin-1	27.444	27.5965	27.4468	27.4292	27.4882	27.4983	27.4298	27.556	27.5948	27.8379	27.7352	27.8157	27.8289	27.6239	NA	NA	27.8315	27.3894	27.3079	27.9398	26.7514	27.7524	27.2506	27.295	28.0602	27.4694	27.8628	27.8154	27.6484	27.8269	27.2201	27.4141	27.2278	27.3845	27.6435	27.7106	27.4554	27.4882	27.4859	27.3815	27.7139	27.6357	27.5382	27.32	27.7019	27.9451	27.7316	27.5876
FLOT2_HUMAN	Flotillin-2	27.2198	27.0505	27.3582	27.2606	27.2836	27.5376	27.0498	27.3908	27.8071	27.6726	27.4451	27.5284	27.1769	27.1839	NA	27.9288	27.2343	27.2626	27.5952	27.2723	27.1619	27.256	27.3798	27.3994	27.4195	27.3125	27.1803	27.6984	27.4088	27.6079	27.4311	27.5776	27.5612	27.2593	27.3221	27.398	27.4778	26.972	27.4401	27.6134	27.2061	27.6543	27.0635	27.1515	27.7135	27.5841	27.341	27.9134
FMNL1_HUMAN	Formin-like protein 1	30.4684	30.5171	30.6421	30.6005	30.625	30.586	30.674	30.6957	30.7798	30.6118	30.6004	30.5838	30.6882	30.7045	30.6504	30.5306	30.5718	30.5751	30.6106	30.8739	30.5141	30.5866	30.5884	30.6632	30.6884	30.579	30.6168	30.6909	30.5625	30.6486	30.5988	30.6701	30.801	30.5539	30.6718	30.5638	30.4412	30.4183	30.6117	30.5292	30.6015	30.5046	30.6415	30.4241	30.4542	30.4599	30.5341	30.8582
FMNL2_HUMAN	Formin-like protein 2	27.4283	27.7397	27.9962	27.7125	27.686	27.741	27.8926	27.8503	27.7253	27.5592	27.8941	27.502	27.7436	27.9514	27.7619	NA	27.7156	27.7745	27.669	27.8678	27.6139	27.6529	27.762	27.6784	27.9389	27.8243	28.168	27.7607	27.889	27.7553	28.1036	28.1878	27.8904	27.7212	27.7928	27.9946	27.69	27.7416	27.5694	27.9293	27.979	27.3619	27.3992	27.3132	27.9381	28.4794	27.7745	27.902
FNTA_HUMAN	Protein farnesyltransferase/geranylgeranyltransferase type-1 subunit alpha	26.9669	26.9778	27.1307	27.0826	26.8932	26.5427	27.3538	27.2939	26.8863	27.3023	27.1097	27.0109	27.1754	27.2405	27.4014	NA	26.8238	26.8016	27.1469	26.8697	27.172	26.9337	27.0664	27.3102	27.1432	26.9692	26.9684	27.1999	26.7612	26.8954	27.1581	27.1595	26.7691	27.3068	27.1035	27.3571	26.8168	27.0547	27.1967	26.7547	27.3644	26.9636	27.2719	26.9914	27.0298	27.3014	27.2577	27.6331
FNTB_HUMAN	Protein farnesyltransferase subunit beta	26.1977	25.9298	25.7838	26.407	NA	25.8422	25.9595	26.4801	25.8398	26.4912	25.8205	NA	26.2551	25.5075	NA	26.1075	26.0502	26.1395	25.9307	26.2328	26.3864	26.2463	26.428	NA	NA	NA	26.4207	25.9501	NA	26.349	26.062	26.0232	26.4532	26.0914	26.4679	26.3274	NA	26.2929	NA	26.3215	NA	26.4557	25.4926	26.2393	25.7811	25.4147	NA	25.4396
FOXK1_HUMAN	Forkhead box protein K1	27.0679	27.2941	27.1883	27.2697	27.1348	27.0762	26.9575	NA	27.4921	27.3104	27.2266	27.0224	NA	27.0992	27.1981	NA	NA	27.4885	27.3207	27.3564	26.4883	27.2197	26.6749	27.111	27.2298	27.1787	27.4001	NA	27.1546	27.2244	27.4956	27.1205	27.3934	26.892	27.4281	27.4876	27.2694	26.7971	NA	27.2596	27.0909	27.2016	27.349	26.886	26.8763	27.1418	26.901	27.3477
FPPS_HUMAN	Farnesyl pyrophosphate synthase	29.9093	29.8352	29.8156	30.0837	29.6441	29.7895	30.0101	29.8087	29.529	29.5805	29.8545	29.7021	29.7333	30.0096	29.8597	29.7099	29.7863	29.839	29.8026	29.8181	30.0356	29.9859	29.92	29.99	29.8045	29.7403	29.9157	30.1166	29.8063	29.6786	30.0112	29.986	29.7917	29.8517	30.0798	29.9568	29.6528	29.7931	30.0971	29.8869	30.2155	30.243	30.0607	30.1014	30.0553	29.9643	30.2716	30.0497
FRMD8_HUMAN	FERM domain-containing protein 8	27.0172	26.8474	NA	NA	26.847	26.6486	27.0521	NA	26.6168	27.1934	26.6065	26.834	NA	27.0062	27.3917	NA	27.7543	27.314	27.5035	27.3455	26.6034	26.2809	26.6683	26.7428	26.8055	26.4847	26.3833	26.4398	26.7221	26.1814	26.6984	27.0461	25.9844	26.5372	26.5889	26.8182	26.6079	26.0675	26.4991	26.5634	27.3803	26.8963	27.3129	27.1093	27.0067	27.1578	26.9105	27.5856
FSCN1_HUMAN	Fascin	33.5078	33.382	33.5871	33.6701	33.3296	33.2185	33.4939	33.4021	32.9605	33.3288	33.5163	33.4935	33.2738	33.5362	33.4798	33.2029	33.2352	33.3408	33.5317	33.4122	33.3608	33.5958	33.312	33.3726	33.2677	33.3484	33.3971	33.5312	33.2156	33.1932	33.4738	33.2542	33.2518	33.4587	33.5155	33.5505	33.1404	33.3149	33.5027	33.2763	33.5712	33.6771	33.5966	33.3108	33.5211	33.4346	33.6495	33.5302
FTO_HUMAN	Alpha-ketoglutarate-dependent dioxygenase FTO	26.0635	25.8956	26.0094	26.3108	25.9898	25.7625	26.3712	26.0991	26.0894	NA	25.8635	25.6328	26.418	25.5601	26.1597	25.7435	25.6098	25.7456	25.973	25.7588	25.9316	26.5921	25.8835	25.9064	25.8237	25.8276	25.6434	26.1151	25.5129	26.7152	25.6089	NA	25.4966	25.8792	NA	26.319	NA	NA	25.9906	27.3482	25.6729	NA	25.9743	25.6537	25.5972	25.6924	25.6332	27.183
FUBP1_HUMAN	Far upstream element-binding protein 1	31.5202	31.614	31.6009	31.1603	31.2254	31.4626	31.3277	31.1895	31.5014	31.2458	31.249	31.2245	31.2	31.4949	31.4106	31.5529	31.541	31.4996	31.3206	31.3751	31.4481	31.546	31.7192	31.6924	31.5831	31.497	31.4953	31.5748	31.5487	31.4654	31.7184	31.4953	31.4278	31.55	31.4283	31.4277	31.6074	31.5092	31.5028	31.5834	31.6684	31.7326	31.9076	31.7946	31.6009	31.4777	31.4846	31.3338
FUBP2_HUMAN	Far upstream element-binding protein 2	32.6241	32.8856	32.7801	32.4508	32.4479	32.6197	32.4904	32.4459	32.6632	32.5898	32.508	32.4861	32.3318	32.5201	32.646	32.6296	32.7522	32.6865	32.4888	32.5724	32.6031	32.5979	32.8065	32.8132	32.6271	32.6283	32.5463	32.6296	32.7282	32.6002	32.7822	32.5001	32.5198	32.6514	32.5683	32.5696	32.8817	32.7036	32.5939	32.6271	32.8378	32.844	32.8097	32.8942	32.9119	32.7441	32.793	32.6273
FUBP3_HUMAN	Far upstream element-binding protein 3	30.3028	30.6263	30.7908	30.3042	30.5156	30.5306	30.2876	30.1972	30.6999	30.3918	30.5769	30.4931	30.2028	30.4751	30.3369	30.6343	30.5051	30.2783	30.5115	30.3638	30.5204	30.6431	30.7033	30.7179	30.7825	30.6607	30.5482	30.6653	30.7306	30.6648	30.7845	30.6896	30.3655	30.7325	30.6485	30.5174	30.7851	30.6003	30.5682	30.6025	30.5587	30.6311	30.6034	30.964	30.7635	30.6925	30.6778	30.6431
FUMH_HUMAN	Fumarate hydratase, mitochondrial	32.426	32.1183	32.3887	32.2116	32.4241	32.6414	32.3683	32.5426	32.6665	32.6493	32.549	32.4565	32.5454	32.6008	32.391	32.3162	32.5066	32.4148	32.4747	32.4851	32.4906	32.3037	32.1904	32.666	32.605	32.5704	32.5235	32.5743	32.536	32.5552	32.525	32.6172	32.7476	32.6039	32.5685	32.5351	32.81	32.513	32.6111	32.5856	32.4615	32.4398	32.1828	32.1044	32.7055	33.0765	32.7401	32.7796
FUS_HUMAN	RNA-binding protein FUS	32.6172	32.7311	32.7117	32.2904	32.6428	32.6486	32.6334	32.6343	32.7895	32.7078	32.6884	32.5383	32.4435	32.6372	32.5541	32.8328	32.6852	32.8536	32.5347	32.522	32.6436	32.6944	32.8468	32.7097	32.6819	32.7781	32.76	32.9149	33.0128	32.8645	32.9864	32.7701	32.5904	32.7412	32.6705	32.674	33.1475	32.9628	32.6844	32.7	32.951	32.8899	32.9832	32.8904	32.9963	33.0461	33.0674	32.8846
FXR1_HUMAN	Fragile X mental retardation syndrome-related protein 1	28.0599	27.8148	27.8767	28.3144	28.1121	27.6874	28.0072	28.3163	28.1405	28.2357	28.0159	28.4288	28.0366	28.1204	28.0779	27.6344	28.2405	28.1742	28.1696	28.1228	28.3838	28.2412	28.2936	28.1837	28.5942	28.4393	28.2941	28.3386	28.5013	28.1469	28.6643	28.4199	28.2515	28.1825	28.3248	28.482	28.2032	28.3433	28.3264	28.2073	28.0949	28.1506	28.4151	28.3693	28.4415	28.4078	28.5245	28.1283
G3BP1_HUMAN	Ras GTPase-activating protein-binding protein 1	31.1789	31.284	31.1655	31.3244	31.2496	31.2492	31.2692	31.0517	31.3207	31.2353	31.3937	31.2802	31.0878	31.2428	31.2171	31.1506	31.1082	31.2194	31.4551	31.1487	31.4313	31.4236	31.4807	31.5855	31.4223	31.425	31.3702	31.4416	31.4374	31.4996	31.276	31.5609	31.3482	31.4973	31.3077	31.3625	31.373	31.4923	31.5345	31.2193	31.1192	31.1885	31.2533	31.3476	31.1489	31.1794	31.1532	31.3609
G3BP2_HUMAN	Ras GTPase-activating protein-binding protein 2	29.8232	29.8706	29.9545	29.86	29.9596	29.7412	29.7136	29.9599	29.8147	30.0188	29.9099	29.7465	29.8773	29.9259	29.8063	30.0282	30.0599	30.003	29.8975	30.0112	29.9027	29.9932	30.0664	30.0611	30.0781	30.0609	29.889	30.1396	30.1015	30.0013	29.8792	29.9603	29.8005	30.0237	29.9091	30.0851	30.0941	29.9549	30.0437	30.0296	29.8423	29.7888	29.9598	30.084	30.0462	29.8393	29.9746	29.9443
G3P_HUMAN	Glyceraldehyde-3-phosphate dehydrogenase	34.7311	34.5193	34.6401	34.6934	34.6633	34.5118	34.7287	34.5064	34.407	34.5692	34.6612	34.4431	34.4381	34.6996	34.5268	34.4756	34.4452	34.5212	34.6855	34.473	34.8034	34.8761	34.8088	34.842	34.6987	34.8131	34.759	34.8731	34.6131	34.6929	34.8835	34.7538	34.7228	34.8761	34.9636	34.8834	34.6004	34.6989	34.7994	34.7395	34.9149	34.837	34.6682	34.8899	34.6979	34.5978	34.7787	34.5433
G6PD_HUMAN	Glucose-6-phosphate 1-dehydrogenase	31.3021	31.2495	31.233	31.3942	31.1511	30.8495	31.1664	31.1775	31.0798	30.8918	31.1991	31.1672	31.1128	31.2475	31.0062	30.8015	30.9267	31.1026	31.2424	31.1885	31.3054	31.3757	31.3052	31.2446	31.2226	31.1144	31.4074	31.3775	31.0764	31.2971	31.0877	31.2079	31.0951	31.3085	31.2785	31.2987	31.0648	31.1221	31.3986	31.2588	31.3535	31.3658	31.2101	31.1248	31.2283	31.2585	31.3581	31.3231
G6PE_HUMAN	GDH/6PGL endoplasmic bifunctional protein	29.0709	29.3141	28.7329	28.9835	29.1063	29.2378	29.0955	29.2	29.2854	29.184	29.081	29.0786	29.4776	28.8354	29.0655	28.4435	29.1723	29.1273	29.4276	28.9514	28.8809	28.9688	29.4352	29.1666	29.2671	29.2516	29.3246	28.7864	28.9373	29.0055	28.8236	29.3386	29.6011	29.0382	29.0441	29.1778	29.2863	29.0162	29.148	29.2103	29.0504	29.0935	29.1854	29.3192	28.9027	29.0194	28.8632	28.8423
G6PI_HUMAN	Glucose-6-phosphate isomerase	32.6692	32.7059	32.4796	32.7154	32.4944	32.4561	32.6346	32.7697	32.3426	32.5233	32.596	32.5447	32.7847	32.5762	32.7704	32.4845	32.5042	32.4102	32.6196	32.6038	32.7487	32.7643	32.6546	32.6971	32.5471	32.6155	32.7674	32.6542	32.4367	32.4755	32.5116	32.5537	32.5152	32.7822	32.7671	32.4869	32.369	32.5172	32.7602	32.524	32.6729	32.7808	32.5651	32.6478	32.5042	32.4855	32.6788	32.5858
GAK_HUMAN	Cyclin-G-associated kinase	27.918	27.4043	27.3363	27.7358	27.3567	27.5712	27.6729	28.4095	27.3194	27.6316	26.9526	27.0765	27.8458	27.2538	27.228	27.4245	27.2837	27.3971	27.4037	27.0528	27.052	27.5558	27.045	27.2387	27.0134	27.3808	27.4954	28.0097	27.0466	27.2454	27.3622	26.9639	27.1855	27.6451	27.1157	28.5713	26.9886	27.1637	27.2412	27.3455	27.3232	27.3198	27.1918	27.541	27.333	28.0488	26.8618	27.988
GALK1_HUMAN	Galactokinase	28.1444	27.8619	27.6418	28.5532	27.8633	NA	27.3743	27.6699	27.2635	27.6952	27.6171	27.7072	27.8685	27.8466	27.2422	27.5456	27.6754	27.4688	28.0768	27.5277	28.0182	28.0006	28.2879	28.2202	27.8163	27.7242	28.0437	27.7361	27.7465	27.8646	27.8266	27.524	27.7769	28.0649	28.1003	27.8874	27.4865	27.7543	27.8938	27.9504	27.3983	27.5035	27.9607	28.1446	27.3679	27.8109	27.5965	27.3923
GALM_HUMAN	Aldose 1-epimerase	NA	27.7855	27.0801	27.2464	27.4553	27.3275	27.4176	27.6099	NA	27.4473	27.7369	27.5956	28.3803	27.521	27.6369	NA	27.5876	27.2836	27.1946	27.7794	27.7542	27.8164	27.6855	27.7632	27.9129	27.1679	27.4655	27.5483	27.6769	27.2019	27.5951	27.8352	27.2499	27.8965	27.9068	27.3513	27.7203	27.3006	27.6132	27.4519	27.9755	27.8788	27.6	27.4022	27.4383	27.6562	27.2822	27.6009
GALT2_HUMAN	Polypeptide N-acetylgalactosaminyltransferase 2	29.9365	29.884	29.7556	29.8433	30.0587	29.909	29.7797	29.9695	29.9454	29.9321	29.865	29.9448	29.9321	29.9232	29.9432	29.5417	29.9087	30.0695	29.9324	30.0765	29.6819	29.7941	29.8259	30.0251	30.0497	30.1163	29.796	29.7886	29.989	29.8162	29.7363	29.9913	30.1112	29.8043	29.984	30.0966	29.8446	29.7984	29.7199	29.7575	29.6612	29.6947	29.5052	29.4868	29.7966	30.0229	29.6375	29.7362
GAMT_HUMAN	Guanidinoacetate N-methyltransferase	28.0582	28.0294	27.9677	28.0818	28.1857	27.5054	28.5323	NA	27.9296	28.082	28.286	28.0562	27.9714	27.8401	27.7277	NA	27.7087	28.0793	28.2455	27.9549	27.9811	28.2321	27.7182	28.2	27.6961	27.7624	27.9585	28.0627	27.9165	28.1652	NA	27.9101	27.9636	27.933	27.9565	28.1462	27.8729	27.8748	28.1818	28.0334	27.0752	27.9498	28.0269	27.751	27.2386	27.319	27.7681	27.6357
GANAB_HUMAN	Neutral alpha-glucosidase AB	34.1393	34.127	34.1605	34.0841	34.229	34.2134	34.0326	34.0003	34.2567	34.2121	34.122	34.1437	33.974	34.0008	34.0503	34.2223	34.2531	34.1396	34.0882	34.11	34.2954	34.1828	34.4165	34.273	34.3716	34.3047	34.2528	34.1929	34.3632	34.3625	34.3426	34.1679	34.3282	34.2077	34.1756	34.1833	34.4599	34.3606	34.2498	34.3025	34.1324	34.1808	34.3077	34.4244	34.1863	34.1143	34.1215	33.9609
GAPD1_HUMAN	GTPase-activating protein and VPS9 domain-containing protein 1	27.8601	27.8662	27.9869	27.8154	27.8792	28.0114	27.7684	27.5134	NA	27.8068	28.0109	27.8635	27.6211	28.0028	27.1254	NA	NA	27.8371	NA	NA	27.5048	27.6985	NA	27.4498	27.6767	27.922	27.8035	27.718	27.3767	27.5738	27.3694	27.7165	27.9256	27.5712	27.1603	28.0247	28.0424	27.5846	NA	27.5619	27.6747	27.6897	27.6684	27.6125	27.6034	27.6688	27.3161	NA
GAPR1_HUMAN	Golgi-associated plant pathogenesis-related protein 1	29.1114	29.175	29.351	29.098	29.0479	29.437	29.1112	29.1882	28.9857	29.1927	29.3088	29.3435	29.159	29.6332	28.9733	29.412	29.4291	29.4851	29.2476	29.0116	28.9856	29.043	29.014	29.2389	29.3029	29.3197	28.8752	29.1386	29.3887	29.2252	29.5131	29.3489	29.2472	29.1461	29.1891	28.9881	29.4541	29.2817	29.0488	29.0322	29.6122	29.2314	29.4715	29.4355	29.7002	29.5241	29.4438	29.7283
GAR1_HUMAN	H/ACA ribonucleoprotein complex subunit 1	29.3476	29.2284	29.5204	29.3302	29.1785	29.2487	28.9059	28.9995	28.8267	28.852	28.9461	28.4266	28.9645	29.0837	28.8222	28.6688	28.5453	28.8579	28.9302	28.43	29.1904	29.4374	29.2885	29.5901	29.2014	27.4445	29.0197	29.323	29.1355	28.5872	29.1978	28.9074	29.4581	29.244	29.3036	29.2896	29.4449	29.3752	29.2188	29.4237	29.2056	29.1676	29.4122	29.1867	29.4048	29.3513	29.2911	29.4999
GARS_HUMAN	Glycine--tRNA ligase	31.174	31.1997	31.3235	31.2864	31.1029	31.067	31.2867	31.4672	31.0647	31.0126	31.0703	31.1705	31.2233	31.1534	31.278	30.8435	31.2256	31.201	31.1158	31.2698	31.2365	31.3811	31.288	31.1206	31.2406	31.2468	31.2165	31.1758	31.1399	31.1654	31.2962	31.2037	31.2476	31.2701	31.0795	31.1387	30.8568	30.9771	31.2254	31.2175	31.042	31.3149	30.9614	30.9841	31.1395	31.1115	31.1155	31.2952
GATM_HUMAN	Glycine amidinotransferase, mitochondrial	29.8109	29.5965	29.9248	29.4727	29.8524	29.8629	29.929	29.9164	29.9314	30.0329	29.8243	29.7892	30.0044	29.8876	29.8604	29.0678	30.0184	29.9428	29.9063	29.7959	29.7385	29.4559	29.2738	29.6231	29.6572	29.9732	29.5513	29.4656	29.6931	29.5561	29.889	29.8122	29.6019	29.4981	29.4412	29.6278	29.9045	29.6302	29.5956	29.7319	29.9333	29.6263	29.2402	29.3571	29.9959	29.946	30.089	29.8422
GBB1_HUMAN	Guanine nucleotide-binding protein G(I)/G(S)/G(T) subunit beta-1	32.9901	32.9997	33.2232	32.8887	33.0835	33.0918	33.1121	32.7385	33.1266	33.025	33.067	33.0518	33.0454	33.2792	32.9404	33.0349	33.1093	33.2017	33.0746	33.0806	32.9061	32.8379	32.9414	32.9496	33.1421	33.1668	32.9105	33.0527	33.2024	33.0712	33.2105	33.1679	33.0748	33.0051	32.9505	32.9366	33.2269	32.9956	33.0133	32.8818	33.221	32.9697	33.0278	32.812	33.4141	33.3137	33.3638	33.0403
GBB2_HUMAN	Guanine nucleotide-binding protein G(I)/G(S)/G(T) subunit beta-2	31.8456	31.7623	31.788	31.587	31.7636	31.8402	31.6893	31.4929	31.9316	31.7273	31.6609	31.7683	31.6243	31.8114	31.2701	31.6219	31.7065	31.7877	31.8017	31.6597	31.593	31.4471	31.5224	31.6353	31.8338	31.7603	31.5378	31.7045	31.6453	31.6601	31.8659	31.866	31.6811	31.5815	31.5568	31.6135	31.8184	31.4839	31.6253	31.686	31.8056	31.4958	31.7281	31.5403	31.9594	31.8811	31.7225	31.6366
GBB4_HUMAN	Guanine nucleotide-binding protein subunit beta-4	29.4091	29.2488	29.4574	29.0903	29.2167	29.4034	29.3924	29.1115	29.3687	29.2608	29.3973	29.1777	29.3094	29.9178	29.3483	29.4084	29.4362	29.7552	28.9409	29.5522	29.419	29.2405	29.3114	29.2799	29.2333	29.4041	29.4136	29.6675	29.4847	29.4626	29.7551	29.3541	29.9581	29.3978	29.2294	29.2243	29.3678	29.487	29.1333	29.716	29.3695	29.3101	29.3631	29.2253	29.5048	29.2793	29.4486	29.5303
GBF1_HUMAN	Golgi-specific brefeldin A-resistance guanine nucleotide exchange factor 1	27.1575	26.6711	26.7273	27.0713	26.9823	26.4026	27.2478	27.5096	26.6958	26.7675	26.402	27.149	27.0823	25.9491	27.168	26.1096	27.0415	27.0441	27.1737	26.8075	26.9625	27.0997	26.9421	26.726	26.9611	26.8533	27.086	26.9895	26.6331	27.6306	26.856	26.8755	27.0239	26.9857	27.1705	27.2268	26.2185	27.2061	26.9317	26.8738	27.1904	26.9548	26.5802	27.2311	NA	26.9437	26.9185	26.7632
GBG5_HUMAN	Guanine nucleotide-binding protein G(I)/G(S)/G(O) subunit gamma-5	29.6025	29.0025	29.609	29.2395	29.0715	29.634	29.4437	30.4668	29.0128	29.4995	29.2588	29.4922	30.4569	29.3905	29.462	30.1419	29.8273	29.6965	29.0548	29.4864	28.8759	28.2535	28.5497	29.1416	29.1621	28.2519	28.1407	27.1735	29.2764	29.4065	28.786	29.1946	29.7531	28.2028	28.7627	28.9888	29.4001	29.1891	29.2311	29.3453	29.5352	28.9011	29.4457	27.3914	29.6651	28.8987	29.2805	28.6378
GCDH_HUMAN	Glutaryl-CoA dehydrogenase, mitochondrial	28.1222	27.7935	28.5393	27.7656	28.0797	28.4002	28.0144	27.6473	28.0349	28.1944	28.2846	28.1319	27.4976	28.179	27.5032	NA	27.9045	27.9999	28.373	NA	28.4139	27.8901	27.7936	27.8176	28.0649	28.1529	27.4805	27.8337	28.0386	27.9659	28.5595	28.051	28.3529	27.6928	27.9214	28.2523	27.9674	27.9696	27.8969	28.1763	28.0691	27.7721	27.4792	27.7323	28.2724	28.679	28.5788	28.3843
GCN1_HUMAN	eIF-2-alpha kinase activator GCN1	30.4839	30.4743	30.563	30.6395	30.5108	30.3698	30.5044	30.7294	30.4653	30.4469	30.4574	30.4201	30.7104	30.4997	30.71	30.0833	30.3863	30.384	30.3427	30.4305	30.5442	30.6143	30.5586	30.4965	30.615	30.4162	30.7561	30.643	30.321	30.3994	30.2498	30.3833	30.5822	30.6688	30.6148	30.558	30.1418	30.4299	30.6228	30.5123	30.2507	30.4351	30.2976	30.3378	30.2438	30.5207	30.2451	30.5929
GCP2_HUMAN	Gamma-tubulin complex component 2	27.5252	27.4937	27.504	27.4345	27.1085	27.2246	27.4661	27.5314	27.4958	27.2738	27.5189	27.0814	27.6813	27.2207	27.6493	NA	26.8465	27.3122	27.2883	27.3187	27.8105	28.0217	28.0004	26.5736	27.277	27.119	27.3403	26.9736	27.4067	26.9784	27.2911	27.6071	27.5416	27.4942	NA	NA	26.8395	27.3439	27.4183	27.0618	27.3367	27.8467	27.3626	26.9028	27.3416	27.7306	27.6594	27.2795
GCP3_HUMAN	Gamma-tubulin complex component 3	NA	27.7831	NA	27.5691	27.5521	27.7378	28.0904	NA	28.0972	28.0088	NA	NA	NA	27.9953	27.4694	NA	28.1436	27.4933	28.3594	27.6776	27.8388	28.5576	27.8637	27.6902	27.7933	27.9845	27.4877	27.6702	28.1578	27.5626	27.9138	27.8928	27.8254	27.6275	27.7469	27.8657	27.6442	27.8291	27.4842	NA	27.6128	27.6435	27.7319	27.4674	27.4321	27.7553	27.337	27.6283
GCP60_HUMAN	Golgi resident protein GCP60	29.1315	29.071	29.2848	29.0454	28.8629	28.8505	29.1989	28.6459	28.7799	29.0694	28.8125	29.0293	28.9691	29.2692	29.1246	28.9468	29.1472	29.0108	29.3355	28.9053	29.1086	28.8993	29.2198	29.1619	29.0651	28.9671	29.0213	28.9916	29.0822	28.9903	29.252	28.9427	28.921	29.1124	28.8697	28.9668	29.1922	29.0759	29.0445	29.0831	29.2623	29.0197	29.4357	29.241	29.548	29.1295	29.2135	29.3547
GCR_HUMAN	Glucocorticoid receptor	27.1039	26.81	26.918	26.8706	26.9888	27.4373	26.8582	27.1294	27.1577	26.8269	26.3999	26.5432	27.2992	26.3269	NA	NA	NA	26.5615	26.6777	26.7512	26.5213	26.6566	26.9927	27.1233	26.6363	26.601	26.4325	27.0109	26.619	26.3701	26.9322	27.1436	26.6391	27.1061	26.7221	26.8312	26.9792	26.6178	26.7318	26.5013	26.7345	26.7718	26.9476	26.6915	27.0857	27.2192	26.8997	26.6151
GDIA_HUMAN	Rab GDP dissociation inhibitor alpha	29.091	28.8031	28.6954	28.9813	28.8377	28.5201	28.8294	28.7804	28.6452	28.5239	28.777	28.5931	28.8903	28.8637	28.8626	28.0269	28.5032	28.5467	28.9245	28.7813	28.8284	28.5443	28.6855	28.7769	28.5073	28.6193	28.572	29.3033	28.5851	28.3754	28.5019	28.7492	28.2045	28.9297	28.6583	28.8317	28.5503	28.3674	28.4081	28.6526	28.7012	28.8609	28.7363	28.654	28.4461	28.9978	28.6264	28.7326
GDIB_HUMAN	Rab GDP dissociation inhibitor beta	33.5674	33.6066	33.5189	33.6647	33.5649	33.3881	33.5623	33.7224	33.4022	33.3918	33.6222	33.4854	33.6593	33.4249	33.6977	33.4364	33.2921	33.3966	33.6376	33.6329	33.6136	33.816	33.6239	33.713	33.6164	33.6367	33.734	33.6416	33.3284	33.4483	33.3759	33.4522	33.5429	33.6894	33.6159	33.6638	33.3538	33.5572	33.6464	33.5592	33.6701	33.8407	33.6738	33.6767	33.3447	33.4218	33.4851	33.4486
GDIR1_HUMAN	Rho GDP-dissociation inhibitor 1	32.4258	32.126	32.3335	32.4706	32.2334	32.0091	32.0662	32.1706	31.8172	31.9912	32.1632	32.1597	32.1946	32.4308	32.3653	32.2377	32.1136	32.0427	32.1784	31.9938	32.1172	32.1127	32.0514	32.3053	32.0561	31.9473	32.2151	32.3651	31.9676	31.9597	32.435	32.1932	32.0181	32.3537	32.271	32.1378	32.0518	32.056	32.3892	32.0547	32.4882	32.3306	32.3309	32.3402	32.2616	32.0228	32.2519	31.9756
GDIR2_HUMAN	Rho GDP-dissociation inhibitor 2	32.258	32.0378	32.3224	32.2856	31.9958	32.1379	32.2215	32.2502	31.9812	32.168	32.2061	32.0415	32.1824	32.1401	32.2839	31.9905	31.9306	32.0915	32.1442	32.2848	32.3229	32.3541	32.2007	32.3323	32.2955	32.225	32.3518	32.51	32.1159	32.1948	32.4054	32.3213	32.1811	32.3885	32.4067	32.429	32.1103	32.1554	32.4068	32.2645	32.2349	32.6201	32.2412	32.0165	32.1462	31.8646	32.2784	32.1778
GDS1_HUMAN	Rap1 GTPase-GDP dissociation stimulator 1	30.096	30.2699	29.9552	30.2427	29.9947	30.0885	30.0619	30.3668	30.2842	29.8674	29.941	29.9848	30.0501	29.867	30.4716	29.8443	30.0116	30.1814	30.0064	30.0877	30.0919	30.2286	30.0747	30.2307	30.2433	30.0816	30.3742	30.151	29.9591	30.1613	30.1158	29.8445	29.9228	30.323	30.2521	30.107	29.8794	29.9615	30.244	30.2287	30.0202	30.253	29.9773	29.9675	29.8849	30.2271	30.008	30.213
GELS_HUMAN	Gelsolin	35.3448	35.2311	35.3118	35.4858	35.1578	35.0303	35.2127	35.2615	34.9751	35.1616	35.2174	35.2911	35.1635	35.3343	35.2735	35.1366	35.1471	35.2155	35.3517	35.3012	35.3243	35.4165	35.3069	35.2966	35.1338	35.2236	35.356	35.2888	35.0896	35.2205	35.3323	35.1672	35.0992	35.3537	35.4431	35.395	35.0369	35.2697	35.3818	35.3055	35.4208	35.4798	35.3038	35.3548	35.2639	35.1709	35.2615	35.3978
GEMI4_HUMAN	Gem-associated protein 4	26.7441	26.6656	26.7628	27.5885	27.048	26.8794	NA	26.6882	26.7822	26.9185	26.208	26.8339	26.6941	NA	27.0055	NA	26.7992	26.2745	26.7469	27.2052	26.9946	26.9114	26.7623	26.4601	26.9289	27.1437	26.5645	NA	26.9579	27.4078	NA	26.2762	26.8888	26.7416	26.9815	26.5588	26.9053	27.0334	26.8918	27.2296	NA	NA	27.0791	27.5557	26.9343	NA	25.8423	NA
GFPT1_HUMAN	Glutamine--fructose-6-phosphate aminotransferase [isomerizing] 1	29.3819	29.2904	29.1683	29.2435	29.058	29.2718	29.4279	29.3804	28.7917	28.8192	29.4969	28.9611	29.263	29.1817	29.3695	27.7768	28.7533	29.3042	29.2062	29.169	29.3244	29.5341	29.4085	29.5074	29.379	29.5037	29.5883	29.3926	29.1356	29.2001	29.4077	29.1814	29.1925	29.4266	29.3273	29.3441	29.027	29.2689	29.4427	29.2432	29.4126	29.5188	29.3962	29.3899	29.2236	29.5541	29.5408	28.9441
GGACT_HUMAN	Gamma-glutamylaminecyclotransferase	26.4008	26.3922	26.3574	26.4795	26.0246	25.9704	27.1845	26.9591	26.5623	26.0027	27.1817	26.1165	26.5435	26.8565	26.4403	NA	26.3968	26.1964	26.9239	26.4498	26.3084	26.7036	26.4941	26.7049	26.5691	26.7758	26.4264	26.3888	26.3496	26.4095	26.6845	26.2864	26.9608	27.0543	26.8208	26.7389	26.2452	26.1906	26.7891	26.564	26.5912	26.6596	26.1333	26.322	26.6574	26.6702	26.6991	26.6319
GGH_HUMAN	Gamma-glutamyl hydrolase	27.8256	27.7857	27.2944	28.0982	27.9959	27.8157	27.3235	27.8427	27.7702	27.9092	27.777	28.0036	27.8536	27.3645	27.9024	27.4249	28.0037	27.9567	27.8551	27.9867	28.2197	28.3802	28.5523	28.3195	28.4177	28.1607	27.9749	27.7735	28.0188	28.0242	28.2184	28.3247	28.3424	28.0717	28.1101	28.1797	27.9916	28.1297	28.2076	28.3349	27.9162	27.7739	28.078	27.9106	27.5475	27.4946	27.2448	26.9248
GGT1_HUMAN	Gamma-glutamyltranspeptidase 1 ;Putative gamma-glutamyltranspeptidase 3;Inactive gamma-glutamyltranspeptidase 2	29.2417	29.5449	29.5052	29.0543	29.7304	29.4791	29.4511	29.3189	29.5199	29.2319	29.5634	29.3721	28.9738	29.3967	29.2377	29.6737	29.4065	29.368	29.5154	29.3031	29.4337	29.4529	29.5737	29.7094	29.7394	29.2713	29.2188	29.7145	29.6203	29.8171	29.8155	29.6233	29.5569	29.5516	29.6257	29.7368	29.6196	29.1904	29.2915	29.3924	29.7083	29.593	29.6449	29.5829	29.7477	29.8393	29.6492	29.612
GGYF2_HUMAN	GRB10-interacting GYF protein 2	27.1922	NA	27.124	26.5469	27.3373	27.3288	NA	27.6002	26.7601	27.3246	NA	27.5273	NA	NA	27.0198	NA	27.7236	27.2824	27.4909	27.1919	27.4404	27.2311	27.4381	27.0224	27.1669	27.1243	27.0675	27.0548	27.3697	26.9536	26.6091	26.8304	27.433	26.737	26.9144	27.4433	27.3586	NA	27.4501	27.4236	26.5476	27.0434	27.5755	27.2334	26.6414	26.7665	26.8341	26.3927
GHC1_HUMAN	Mitochondrial glutamate carrier 1	27.9427	27.3953	27.8227	27.1985	27.5465	28.2516	27.3576	27.21	27.955	27.5675	27.7248	27.8371	28.0864	27.7845	27.5703	28.075	28.1266	27.9826	27.8036	27.7948	27.877	27.5445	27.4042	28.2369	27.975	27.8455	27.6549	27.7759	27.8007	27.6581	27.6318	27.9479	27.9516	27.9059	27.9771	27.5599	28.0028	27.9309	27.7935	27.6898	27.8707	27.6733	27.3827	27.4143	27.8339	28.061	28.0705	27.659
GID8_HUMAN	Glucose-induced degradation protein 8 homolog	28.3028	28.1321	28.0864	28.1566	28.1184	28.295	28.2177	28.2482	28.247	28.2544	28.7272	28.1985	28.2679	28.0884	28.4573	27.7372	28.5098	28.0611	28.143	28.0209	28.1742	28.0952	28.4253	28.2852	28.1494	28.6038	28.4049	28.0078	28.2133	28.7023	28.2162	28.522	28.3738	28.1126	28.0879	28.092	28.2183	28.1991	28.4276	28.1105	28.0661	27.9589	28.5503	28.3541	27.9122	28.2118	27.6586	28.1152
GILT_HUMAN	Gamma-interferon-inducible lysosomal thiol reductase	30.8887	30.8652	31.0072	30.7308	30.9035	30.9633	30.9669	31.2614	31.0757	30.9712	30.6023	30.8301	30.8672	30.9066	31.1298	30.8859	31.132	31.1162	31.0619	30.9575	30.4842	30.2696	30.5201	30.6349	30.5949	31.0252	30.6453	30.7889	30.8898	30.9828	30.694	30.9755	30.8851	30.8966	30.5589	29.8659	30.7537	30.8392	30.5687	30.5259	31.0172	30.7029	30.8138	31.0167	30.963	30.8144	30.8305	30.8988
GIPC1_HUMAN	PDZ domain-containing protein GIPC1	25.5747	25.9115	NA	25.9464	NA	NA	NA	NA	NA	25.0334	NA	NA	25.5302	25.0307	NA	NA	25.9455	25.2452	NA	25.7861	26.3397	25.7928	26.3978	26.1838	NA	26.7281	NA	NA	NA	26.277	26.1165	26.0445	NA	26.2744	26.4504	25.8734	NA	26.0216	NA	NA	NA	25.5618	25.9499	26.5506	26.5899	26.2546	NA	NA
GIPC3_HUMAN	PDZ domain-containing protein GIPC3	NA	25.8772	NA	26.4104	25.9375	26.7425	24.8575	26.8458	NA	NA	NA	NA	26.8175	25.8047	NA	NA	NA	NA	NA	26.9365	NA	27.22	26.107	26.442	NA	26.6006	26.7856	26.0115	NA	26.5869	25.3681	26.3958	26.7551	27.0099	26.3792	NA	27.0003	26.6337	26.6288	26.1124	25.6999	26.0573	26.9008	26.2013	NA	25.974	25.6234	NA
GIT1_HUMAN	ARF GTPase-activating protein GIT1	28.6567	28.7886	28.8701	28.378	28.7343	28.7804	28.8573	28.9539	28.6398	28.492	28.4545	28.302	29.3159	28.3541	28.8769	28.4125	28.4863	28.6582	28.8894	28.8736	28.692	28.626	28.4781	28.9648	28.5815	28.2825	28.2911	28.9072	28.3449	28.3805	28.7196	28.7695	28.6327	29.022	28.4045	28.4756	28.2996	28.3921	28.4309	28.4181	28.2432	28.5287	28.4883	28.7222	28.6351	28.9678	28.322	29.4946
GIT2_HUMAN	ARF GTPase-activating protein GIT2	26.5302	NA	NA	26.9328	27.3336	26.7595	27.1974	26.8818	27.0934	27.0519	26.9866	27.592	27.3721	26.4985	27.3719	NA	27.3314	27.4066	26.7742	27.444	26.9899	26.9432	26.972	NA	26.9932	27.1411	27.1043	27.0764	26.6971	27.0844	27.0015	26.4469	26.7808	27.1246	26.9535	26.9682	26.1005	27.2198	26.7158	26.7718	27.5967	27.2034	26.4724	27.3294	26.9786	27.0071	27.1587	NA
GLCM_HUMAN	Glucosylceramidase	30.0723	30.2553	30.106	30.119	29.9093	29.8125	30.1267	29.7737	30.1487	29.9618	29.6745	29.9975	29.8253	29.7774	29.7721	29.2483	29.805	29.7572	29.8981	29.4194	30.1585	29.9963	30.1009	30.0295	30.1387	29.8449	29.716	29.8021	29.9185	29.748	29.7705	29.8974	30.2397	30.0495	29.9542	29.7654	30.3295	29.8865	30.0402	30.0338	29.8821	29.9979	30.0254	30.0711	30.0089	29.6939	29.6854	29.4685
GLGB_HUMAN	1,4-alpha-glucan-branching enzyme	28.8729	28.7694	28.3607	29.4862	29.0845	28.7489	28.8901	29.0373	28.5655	28.8836	28.8671	29.0171	28.859	28.3768	29.0873	28.3001	28.8973	28.6958	28.9245	29.1719	29.1192	29.1016	29.0363	28.8895	29.0723	28.9051	29.0562	29.0394	29.053	28.8834	28.9409	28.8209	29.0206	29.0946	29.2517	29.3646	28.6677	28.8844	29.0339	29.1458	28.7856	28.9569	28.7526	29.6067	29.5421	29.1516	28.7074	28.8196
GLMN_HUMAN	Glomulin	27.5203	26.8361	26.3888	27.9455	27.699	27.0117	27.0567	27.6634	27.731	27.3502	26.1361	27.5858	27.6979	26.9378	28.0792	27.003	27.3885	27.382	27.1298	27.4634	27.6118	27.7576	27.7358	27.178	26.9276	26.9083	27.5435	26.9309	27.5073	27.9239	27.3821	27.1074	27.8995	27.4591	27.8498	28.063	26.8635	27.9484	27.2101	27.5544	26.1767	27.2879	27.726	28.4203	26.867	27.3805	26.0557	26.5696
GLO2_HUMAN	Hydroxyacylglutathione hydrolase, mitochondrial	27.2362	NA	27.5686	27.2912	27.1454	NA	27.0654	27.3912	27.3003	NA	27.5307	27.0564	NA	27.4678	27.0333	NA	NA	NA	26.8528	NA	26.8948	26.8293	26.6542	26.916	NA	26.7733	27.1562	27.2543	26.9546	26.9674	27.2355	27.0508	26.9528	27.1484	27.3869	26.678	27.0001	26.983	27.2442	26.8014	27.4971	27.6179	27.7285	27.4717	27.7549	27.2042	27.692	NA
GLOD4_HUMAN	Glyoxalase domain-containing protein 4	27.7376	27.8794	28.0768	27.8251	27.8489	27.6407	28.2366	28.2085	28.2292	27.3603	28.056	27.9489	27.896	27.9944	28.2645	28.2523	28.0355	27.6536	27.9357	27.9473	27.6993	27.9947	28.0432	28.092	27.8897	27.8356	27.6564	28.0735	27.6691	27.6103	28.1346	28.0021	27.8697	28.0521	27.7988	27.9262	27.8416	27.8482	27.8341	27.3498	27.8969	28.0365	27.8681	27.6096	27.6728	27.7922	27.7238	28.0373
GLRX3_HUMAN	Glutaredoxin-3	29.8767	29.7725	29.9776	30.0858	29.868	29.9044	29.9161	30.4297	29.8707	29.7854	29.9947	29.9061	30.1945	29.8902	30.5293	29.5147	29.6683	29.8313	29.9624	30.0592	29.9088	30.0154	29.6087	29.8286	29.7573	29.9401	29.9787	29.9442	29.6758	29.8743	30.1299	29.9712	29.7098	30.1349	29.8283	29.9207	29.7261	29.6029	30.0346	29.7673	29.9886	30.0021	29.8342	29.7438	30.0346	29.9022	29.903	30.1148
GLRX5_HUMAN	Glutaredoxin-related protein 5, mitochondrial	28.4553	28.4393	28.0511	27.7497	27.9791	28.3274	28.1053	27.6486	28.5472	27.7959	28.4533	28.3635	27.9441	28.3274	NA	27.1442	27.7532	27.9675	27.9754	27.9655	27.7475	NA	27.5767	28.1092	27.7393	28.041	28.0254	28.0441	27.8483	27.875	28.0779	28.0281	28.2148	27.5711	27.8836	28.0641	28.0666	27.7203	NA	27.7228	28.0813	27.6115	27.9623	27.6306	28.2501	28.3413	28.1583	28.1083
GLSK_HUMAN	Glutaminase kidney isoform, mitochondrial	31.0977	30.6244	31.1655	30.823	31.2129	31.4272	31.012	31.1681	31.1874	31.3595	31.2881	31.2931	31.2914	31.293	31.1172	30.9838	31.3784	31.1661	31.2004	31.1081	31.2076	31.0095	30.7986	31.2141	31.2028	31.2882	31.1868	31.0861	31.3501	31.2511	31.3319	31.4989	31.6472	31.1951	31.4292	31.2476	31.4117	31.3502	31.0578	31.2502	31.2444	30.9669	30.687	30.9333	31.3178	31.5426	31.5149	31.2514
GLU2B_HUMAN	Glucosidase 2 subunit beta	32.3367	32.5593	32.4998	32.2156	32.3646	32.4894	32.5393	32.2282	32.5059	32.5062	32.4396	32.3348	32.2549	32.4392	32.5223	32.5046	32.6739	32.6104	32.3917	32.5088	32.179	32.2359	32.4114	32.4341	32.5026	32.4557	32.3944	32.5008	32.4595	32.5598	32.7879	32.5834	32.2445	32.349	32.4026	32.3481	32.743	32.5198	32.4424	32.3922	32.802	32.5846	32.7339	32.6036	32.5535	32.384	32.7024	32.4723
GLYM_HUMAN	Serine hydroxymethyltransferase, mitochondrial	32.5735	32.4025	32.7993	32.4849	32.6884	32.9689	32.555	32.5754	32.7826	32.6846	32.7954	32.8185	32.5197	32.865	32.4105	32.7131	32.7983	32.7707	32.6115	32.5449	32.769	32.5657	32.5596	32.9524	32.9213	32.9484	32.7655	32.8939	32.9321	32.9107	32.8863	33.1063	32.9904	32.7425	32.8871	32.8777	33.1604	32.8871	32.7939	32.887	32.899	32.5936	32.4175	32.4041	33.0417	33.0534	33.0375	32.8773
GLYR1_HUMAN	Putative oxidoreductase GLYR1	28.5234	28.6175	28.4794	28.4483	28.6924	28.9653	28.7637	29.0508	29.0161	28.8941	28.9387	28.7998	29.3006	28.5949	28.4293	28.6599	29.1011	29.0183	28.7378	28.8272	28.8586	28.7268	28.988	28.986	28.8425	29.0401	29.0142	28.7081	29.2624	29.1184	28.9671	29.0728	28.789	28.7858	28.8754	28.7999	28.8659	28.9838	28.781	28.7941	28.6294	28.6596	28.4623	28.9201	28.6561	29.1535	28.7555	28.5242
GMFB_HUMAN	Glia maturation factor beta	28.2984	28.2467	28.3614	28.3869	28.0752	NA	28.8088	NA	27.8292	27.9297	27.8727	28.1737	28.0247	28.3081	28.0724	NA	28.1933	NA	28.5304	28.0781	28.2274	27.4084	27.7874	26.7165	28.0774	NA	27.9433	27.7528	27.3141	27.6195	28.2426	27.8448	27.7854	27.8841	28.231	28.1715	27.4992	27.9936	28.2555	27.771	NA	27.668	NA	27.8128	NA	27.5928	28.081	NA
GMFG_HUMAN	Glia maturation factor gamma	30.8879	30.7111	30.9096	30.9668	30.7686	30.4552	30.8214	30.7769	30.4736	30.514	30.9328	30.7688	30.5455	30.875	30.707	30.4164	30.6352	30.6063	30.8921	30.8032	30.6384	30.6317	30.6939	30.6357	30.5639	30.5553	30.9226	30.9422	30.4074	30.3255	30.9218	30.4571	30.4413	30.8355	30.7774	30.6951	30.5474	30.6858	30.8966	30.6836	30.5614	30.7422	30.6594	30.5134	30.8199	30.679	30.8078	30.5924
GMIP_HUMAN	GEM-interacting protein	27.3518	27.4594	27.132	27.7804	27.4323	27.1803	27.1394	27.5906	27.1589	27.3052	26.9527	27.4503	27.7113	27.1717	27.4145	NA	27.4829	27.192	27.4678	27.2602	27.6462	27.5097	27.5074	27.6065	27.3813	27.6583	26.8874	27.2886	27.2909	27.2087	27.401	27.4075	27.2294	27.44	27.3233	26.7864	27.1546	27.4257	27.2549	27.7217	27.347	27.5567	27.7251	27.6282	26.9099	27.2592	27.8094	27.5868
GMPPA_HUMAN	Mannose-1-phosphate guanyltransferase alpha	NA	26.6879	26.8791	NA	NA	26.2809	NA	26.6295	NA	26.2755	NA	NA	26.6874	NA	26.5039	NA	NA	NA	26.5679	NA	26.6566	26.7349	26.5231	26.9495	26.9087	26.4956	26.9668	26.9754	27.0646	26.8061	26.8937	26.6417	26.2907	26.8829	26.9755	26.7074	26.6803	26.528	26.9961	26.8967	26.5144	26.9733	26.8937	27.2244	27.304	26.571	27.393	26.415
GMPPB_HUMAN	Mannose-1-phosphate guanyltransferase beta	26.7651	26.4541	26.8506	27.3005	26.7738	27.4217	26.8054	26.8979	26.6672	26.4242	26.7085	26.8711	NA	26.6171	NA	NA	26.3112	26.2835	27.1454	26.8928	27.1308	27.2158	27.1433	26.8924	27.1668	26.7941	26.9343	26.7131	27.0001	26.9771	26.6099	26.6284	27.191	27.3165	27.1357	27.2116	26.6227	26.9517	27.0071	26.9376	26.443	26.8159	26.5407	27.0721	26.5156	27.0175	26.414	26.8251
GNA13_HUMAN	Guanine nucleotide-binding protein subunit alpha-13	28.2763	28.7531	28.8857	28.3344	28.7476	28.9621	28.9646	27.4072	28.6447	28.74	28.8698	28.2197	28.8925	28.8267	28.6812	28.7375	28.5571	28.7125	29.074	28.7655	28.3924	28.5687	28.4123	28.6273	28.8004	28.6607	28.5805	28.5559	28.9131	28.6286	28.6948	28.79	28.6514	28.5308	28.3677	28.5335	28.6956	28.4925	28.4336	28.5404	28.5755	28.7765	28.746	28.7505	28.8181	29.0291	28.5774	28.7495
GNAI2_HUMAN	Guanine nucleotide-binding protein G(i) subunit alpha-2	32.549	32.56	32.601	32.5868	32.5913	32.5962	32.6584	32.4543	32.73	32.6956	32.6647	32.5949	32.5778	32.6521	32.4598	32.5799	32.7018	32.5739	32.6584	32.5765	32.6556	32.6402	32.6295	32.6855	32.9639	32.7231	32.7322	32.6521	32.7471	32.6703	32.8014	32.6419	32.7831	32.6385	32.667	32.546	32.8662	32.5722	32.4849	32.5594	33.0652	32.717	32.8451	32.7022	33.0029	32.7596	32.764	32.7234
GNAI3_HUMAN	Guanine nucleotide-binding protein G(k) subunit alpha	30.2623	30.1987	30.1057	30.0966	30.2368	30.3048	30.1715	30.1289	30.3352	30.2486	30.3435	30.2754	30.1807	30.1114	30.3121	30.3449	30.3713	30.3272	30.1236	30.2711	30.1258	29.8553	29.7938	30.0115	30.3505	30.2929	30.2194	30.0663	30.2069	30.1558	30.2964	29.976	30.2422	30.0368	30.2301	30.0282	30.249	29.9799	30.0076	29.9974	30.464	30.146	30.5341	30.3353	30.8872	30.4588	30.6582	30.5018
GNAQ_HUMAN	Guanine nucleotide-binding protein G(q) subunit alpha	28.3862	27.8785	28.4494	28.1834	28.3264	28.4052	27.9974	28.8921	28.5469	28.5532	28.2191	28.341	28.4959	28.759	28.4494	28.8199	28.2278	28.5301	28.3811	28.5906	27.6571	28.2901	28.2372	28.385	28.7555	28.9433	28.4247	28.0626	28.6596	28.5142	28.1898	28.4984	28.7303	28.4243	28.458	28.2723	28.3533	28.4865	28.459	28.4828	28.4819	28.5295	28.1923	28.5427	28.9068	28.9624	28.5825	29.1713
GNAS2_HUMAN	Guanine nucleotide-binding protein G(s) subunit alpha isoforms short;Guanine nucleotide-binding protein G(s) subunit alpha isoforms XLas	29.0842	29.1946	28.9522	28.9706	28.9892	29.1712	28.7516	29.1768	29.2459	28.9872	29.403	28.9502	29.2826	29.1633	28.8247	28.9932	28.988	29.2197	29.1652	29.0334	28.9037	28.9773	28.6896	28.9068	29.0469	29.0579	29.0497	29.0868	29.2534	29.1599	29.2027	29.1218	28.9388	28.8143	28.8635	29.095	29.0506	29.0585	29.1631	28.9125	29.5853	28.9372	28.965	29.0508	29.4242	29.1789	29.0101	29.357
GNL3_HUMAN	Guanine nucleotide-binding protein-like 3	29.1555	29.5787	29.4223	29.0361	29.3007	29.3995	29.687	29.6839	29.5916	29.5403	29.6746	29.0986	29.6195	29.6814	29.5969	29.6602	29.6818	29.3402	29.4799	29.2188	29.3559	29.254	29.4314	29.38	29.2738	29.5578	29.4499	29.565	29.4301	29.4629	29.867	29.5844	29.3167	29.4401	29.1775	29.27	29.5502	29.1596	29.22	29.2511	29.346	29.4931	29.4689	29.3085	29.5932	29.3429	29.4193	29.6356
GNLY_HUMAN	Granulysin	27.4037	27.2005	NA	NA	NA	26.7945	NA	NA	26.7816	NA	NA	NA	NA	27.1082	NA	NA	NA	NA	26.5346	NA	27.0906	26.6622	26.6337	26.4906	26.745	26.6544	26.9289	NA	NA	26.4286	NA	27.2158	27.1577	26.7928	26.9338	26.6749	26.582	NA	NA	27.1363	27.0748	27.3148	27.8262	27.6089	27.6818	26.6162	26.8654	NA
GNPAT_HUMAN	Dihydroxyacetone phosphate acyltransferase	28.832	28.8218	28.0695	28.6083	28.7975	28.4886	28.6577	28.3769	28.4733	28.6864	28.0708	28.7492	28.4447	28.4692	28.8217	28.3272	28.6312	28.7318	28.7148	28.6593	28.7039	28.7269	28.872	28.2864	28.9639	28.603	29.0404	28.426	29.1573	29.1396	28.8885	28.5011	28.797	28.8755	28.748	28.7229	28.9216	28.9856	28.5392	28.6039	28.9563	28.6679	28.7778	28.9735	28.8589	28.9874	28.6303	28.7577
GNPI1_HUMAN	Glucosamine-6-phosphate isomerase 1	28.9055	28.9924	29.0606	29.4379	28.4701	28.9745	28.6491	29.2039	28.9889	28.9932	29.2704	29.0354	29.0684	28.7777	29.608	NA	28.9426	29.2508	29.0428	29.3996	29.033	29.0102	28.7621	28.8786	28.8283	28.547	28.7601	28.737	28.4266	28.6091	28.1679	28.6979	28.7472	29.1162	28.6938	29.2835	28.5627	28.4661	29.0692	29.1761	28.9838	29.0981	28.6865	29.3674	28.6019	29.0393	29.2855	29.1939
GNS_HUMAN	N-acetylglucosamine-6-sulfatase	30.4615	30.4537	30.426	30.3904	30.4971	30.3379	30.2389	30.2785	30.4641	30.4656	30.0521	30.3989	30.3469	30.0415	30.4986	30.3562	30.5253	30.4149	30.3787	30.175	30.4962	30.3089	30.6885	30.4664	30.6625	30.4116	30.3512	30.5058	30.7106	30.475	30.4189	30.4305	30.5528	30.5523	30.3492	30.3149	30.5583	30.5674	30.4435	30.5244	30.4175	30.6046	30.6023	30.7482	30.4123	30.5745	30.4193	30.3509
GOGA2_HUMAN	Golgin subfamily A member 2	27.8794	28.1571	28.6213	27.4764	27.9096	NA	28.0549	28.1192	29.0391	28.2046	28.3033	27.7194	28.4963	28.2502	28.3296	27.6875	28.3305	28.4673	NA	28.099	27.8274	28.0446	28.0198	28.043	28.2528	28.1591	27.995	28.1871	28.1763	28.2415	28.2787	28.0855	27.9343	27.9757	27.7966	28.2235	28.2951	28.2528	27.749	27.8676	28.2274	28.2207	28.5186	28.2672	28.6043	28.2157	28.6211	28.5032
GOGA3_HUMAN	Golgin subfamily A member 3	27.9505	27.8229	28.3611	27.9807	28.2707	27.8699	27.7943	28.0014	27.8424	27.7864	28.2874	27.916	28.5009	27.584	28.2783	NA	NA	27.854	28.0594	28.1385	27.8774	27.8873	28.0005	28.1104	28.1133	28.0038	27.6745	28.241	27.8257	27.7995	28.3099	28.4404	27.8894	27.9891	27.8674	27.8997	27.841	27.8887	27.8061	27.7821	27.998	28.0568	28.4039	28.0825	28.2694	27.9879	27.8074	27.8998
GOGA5_HUMAN	Golgin subfamily A member 5	26.7684	26.7728	27.3671	26.4498	27.1117	27.3514	27.3753	26.4828	27.4251	27.0547	27.2236	NA	27.2935	27.3839	27.097	26.7563	26.9633	27.304	27.0124	26.9387	26.8558	26.8855	27.0378	27.0744	27.3569	27.1062	26.9345	27.4575	26.9007	27.3444	27.6019	27.0705	26.5948	26.9993	NA	26.6745	27.1105	27.0458	26.8277	27.4646	27.271	26.7062	27.1071	NA	27.3581	27.4458	27.2938	27.2313
GOGB1_HUMAN	Golgin subfamily B member 1	28.122	28.2914	28.8206	28.3263	28.1682	28.4583	28.4161	28.2255	28.4265	28.6726	28.7569	28.2288	28.5748	28.48	28.0949	27.792	28.4426	28.5004	28.0935	28.1201	28.3672	28.4659	28.3459	28.561	28.3513	28.6806	28.5715	28.262	28.7283	28.8024	28.4302	28.5534	28.3269	28.4398	28.7373	NA	28.9084	NA	28.2159	28.4111	28.3893	28.1717	28.5531	28.1585	28.6454	28.5901	28.1649	28.3383
GOLI4_HUMAN	Golgi integral membrane protein 4	27.3877	NA	27.3402	26.4097	NA	27.4313	27.3298	27.7075	26.8342	26.8503	27.225	27.5908	NA	28.07	27.6477	27.843	26.8136	27.8952	NA	27.0988	25.9795	26.7318	26.3822	26.1238	26.5587	26.6333	26.4663	26.4989	26.2417	26.6235	26.759	26.5836	26.4014	26.3123	27.0848	26.9347	26.7553	NA	26.5732	26.5054	26.7305	26.6706	26.9958	26.3078	NA	26.3821	26.8853	26.7763
GOLP3_HUMAN	Golgi phosphoprotein 3	28.8642	28.4872	28.2856	28.6536	28.722	28.5854	28.1187	28.84	28.7578	28.742	28.1431	28.7818	28.5947	28.6364	28.795	28.3732	28.6114	28.7458	28.6806	28.497	28.7351	28.6976	28.788	28.9137	28.6074	28.7813	28.5966	28.6114	28.7348	28.695	28.2149	28.676	28.5053	28.8683	28.7148	28.656	28.5268	28.6955	28.8604	28.6993	27.9312	28.485	28.5945	28.8112	28.1336	28.6919	27.7375	28.3572
GORS2_HUMAN	Golgi reassembly-stacking protein 2	27.8407	NA	27.6609	27.7162	27.5223	NA	27.9671	27.597	27.0247	27.5216	NA	27.5616	28.112	NA	28.0091	NA	27.2685	27.3686	27.3771	27.6172	27.9277	28.1605	28.0843	27.524	27.7127	27.8329	27.7498	28.0045	27.8933	27.6958	28.2501	27.5627	27.6517	27.9309	27.8711	27.4947	27.9021	27.2987	27.272	27.6824	28.5504	27.7767	29.2362	28.0296	27.8888	27.4561	27.3172	27.279
GOSR1_HUMAN	Golgi SNAP receptor complex member 1	27.7275	27.5693	27.527	27.6835	27.7819	27.9076	27.8664	28.0506	27.9902	28.1535	27.7116	27.9127	27.5804	27.8196	28.0055	27.8318	27.9724	27.8404	27.5401	27.8685	27.5165	27.4623	27.2365	27.4398	27.8025	27.4216	27.3573	27.5202	28.1446	27.9913	27.7031	27.7914	27.6519	27.5258	27.7486	27.62	27.5439	27.7578	27.7197	28.0532	27.5225	27.6173	27.541	28.2375	27.8487	27.8602	27.9638	27.7234
GPDM_HUMAN	Glycerol-3-phosphate dehydrogenase, mitochondrial	30.5333	30.5214	30.4996	30.4008	30.5676	30.8468	30.5243	30.4301	30.8744	30.7491	30.6591	30.6704	30.4751	30.6688	30.2154	30.5218	30.5696	30.7635	30.5477	30.5319	30.6369	30.6658	30.7022	30.811	30.8857	30.8853	30.4701	30.7043	30.6923	30.7545	30.8395	30.9287	30.8123	30.6826	30.6103	30.6799	30.8456	30.6965	30.5941	30.7924	30.5988	30.7315	30.4901	30.4955	31.1771	30.9548	30.5499	30.3842
GPNMB_HUMAN	Transmembrane glycoprotein NMB	30.9667	31.2788	31.3086	31.015	30.9937	31.2396	31.0948	31.1954	31.5712	31.2475	31.0481	31.2421	31.0214	31.3988	31.0824	31.2029	31.3735	31.2222	31.2153	31.174	30.8772	31.0802	31.136	31.2408	31.3086	31.2525	31.1895	31.2615	31.4306	31.1406	31.6419	31.0997	31.1956	31.2915	31.0976	31.1013	31.406	31.2218	31.2564	31.1361	31.169	31.2858	31.1563	31.1685	31.483	31.5872	31.3594	31.1914
GPX1_HUMAN	Glutathione peroxidase 1	31.3906	31.264	31.4101	31.4893	31.12	31.2262	31.164	31.3332	31.1719	31.1486	31.2592	30.9786	31.1254	31.0435	31.027	30.9439	30.9171	31.1327	31.2359	30.9565	31.4345	31.526	31.3831	31.4499	31.037	31.0762	31.3283	31.1556	30.9838	30.945	31.3966	31.2088	31.1828	31.4548	31.3407	31.2844	31.2138	31.2677	31.2008	31.242	31.539	31.4883	31.3616	31.3403	30.9723	31.096	31.1279	30.9051
GPX7_HUMAN	Glutathione peroxidase 7	28.587	28.6668	28.9514	29.8499	29.1467	28.7214	28.9004	29.9011	28.9535	29.0339	28.5472	28.7063	NA	28.7847	28.4104	28.5524	28.8693	28.1683	28.6908	28.9995	28.4215	27.9967	28.7117	27.7277	28.316	28.5346	28.5739	28.2188	28.7122	28.7077	28.6655	28.5032	28.5051	27.5304	28.2882	28.4753	28.7392	28.6803	28.2411	26.7561	30.0716	29.723	28.5458	28.2903	30.3314	28.5627	29.8923	28.643
GRAP1_HUMAN	GRIP1-associated protein 1	27.6814	27.2544	27.7108	27.1271	27.5156	NA	27.5538	27.1944	NA	27.0043	27.9021	NA	27.582	27.0601	27.6314	NA	NA	27.6162	27.3773	28.1981	27.1882	27.1022	26.9222	26.9816	27.3787	27.007	26.8637	27.1712	27.1382	26.6651	27.5968	27.1943	26.8123	27.4036	27.6441	27.4879	27.1067	26.7771	27.7997	26.9526	28.0416	27.2504	27.8138	27.3942	27.6276	27.0015	27.6252	NA
GRB2_HUMAN	Growth factor receptor-bound protein 2	30.0423	30.1859	30.0835	30.1981	30.1029	29.6178	30.1925	30.1545	29.7617	30.0092	30.2984	30.0217	30.1399	30.1299	30.1208	30.1935	30.0026	30.0474	30.2508	30.1209	30.2285	30.2525	30.3311	30.1405	30.2091	30.358	30.1752	30.3459	29.9592	30.2841	30.2152	30.216	30.1918	30.3659	30.1404	30.2969	30.2483	30.2035	30.1891	29.9671	30.0381	30.3648	30.4129	30.3551	30.2935	30.2498	30.4287	30.355
GRHPR_HUMAN	Glyoxylate reductase/hydroxypyruvate reductase	30.2272	30.2226	29.892	30.2484	30.0647	29.9824	30.0234	29.8908	30.2272	30.1893	30.1722	30.1789	29.6528	30.3026	29.7462	29.871	29.7503	30.0176	30.2262	29.9101	30.14	30.2376	30.089	29.9952	30.0817	30.0928	30.1951	30.0251	30.0585	29.9246	29.9496	30.2075	30.0188	30.405	30.2205	30.2222	29.9757	30.1812	30.2222	30.2539	30.0312	29.9033	29.8582	30.015	29.9688	30.078	30.0153	30.0847
GRN_HUMAN	Granulins	30.3467	30.758	30.5165	30.3236	30.2269	30.5034	30.2556	30.2065	30.5044	30.5671	30.3851	30.5305	30.1355	30.7956	30.4748	30.7126	30.9496	30.7322	30.4938	30.5787	30.4201	30.3555	30.3618	30.4671	30.3392	30.2291	30.4595	30.3964	30.6234	30.4495	30.5279	30.3846	30.5009	30.2423	30.2035	30.3398	30.6523	30.5099	30.3699	30.3894	30.6104	30.7119	30.8126	30.6418	31.0244	30.7213	30.7097	31.015
GRP75_HUMAN	Stress-70 protein, mitochondrial	33.8138	33.5381	34.058	33.6477	33.9628	34.2136	33.9545	33.8608	34.0573	33.9825	34.1494	33.9683	33.8867	34.1619	33.7043	34.0504	34.075	33.9955	34.0125	33.8601	33.9196	33.6766	33.5063	33.9711	33.9944	34.0643	33.8704	34.0941	34.1025	34.0199	34.2806	34.2985	34.0571	33.8728	34.0063	33.9013	34.2027	33.9721	33.9352	33.9947	34.2114	33.766	33.8089	33.6057	34.5292	34.4835	34.5616	34.2995
GRP78_HUMAN	78 kDa glucose-regulated protein	36.0926	36.2148	36.2622	36.0312	36.1691	36.198	36.1358	35.9555	36.1536	36.1624	36.2233	36.1615	35.9566	36.1262	36.0629	36.3108	36.1936	36.159	36.1545	36.0146	36.1561	36.1137	36.3011	36.2976	36.2429	36.2804	36.1651	36.3085	36.3345	36.2651	36.5287	36.335	36.2364	36.1629	36.138	36.1754	36.4103	36.3138	36.2033	36.1837	36.4307	36.2337	36.4264	36.3654	36.4925	36.3422	36.429	36.1347
GRPE1_HUMAN	GrpE protein homolog 1, mitochondrial	30.1314	30.4007	30.4065	30.0689	30.5084	30.7442	30.3568	30.3474	30.4262	30.4989	30.4841	30.4064	30.3662	30.5093	30.3763	30.9025	30.6355	30.5002	30.5657	30.2365	30.5724	30.3489	30.4646	30.6916	30.669	30.7244	30.445	30.7453	30.7797	30.677	30.7184	30.8951	30.5923	30.5729	30.6059	30.4981	30.9043	30.6032	30.4817	30.7703	30.8157	30.7309	30.4283	30.3283	31.0213	31.1509	31.1404	30.7732
GRSF1_HUMAN	G-rich sequence factor 1	28.4136	28.039	27.2993	28.2842	28.3626	28.7527	28.143	28.5666	28.4652	28.7372	28.8506	28.7043	27.727	28.2562	28.1014	28.4	28.7414	28.5172	28.0614	28.4669	28.7551	28.0062	27.7933	28.2226	28.6637	28.8055	28.2908	28.1673	28.5074	28.5539	28.9636	27.9296	28.7237	28.2247	28.8218	28.508	28.6058	28.5006	27.5863	28.545	28.4262	28.3507	28.295	28.0533	28.5502	28.27	28.1829	27.8538
GRWD1_HUMAN	Glutamate-rich WD repeat-containing protein 1	28.6961	28.9156	28.7846	28.7319	28.5955	28.4732	28.7612	28.4543	28.627	28.3815	28.6526	28.6965	28.6629	28.6341	28.6519	28.8286	28.5667	28.4753	28.7613	28.6342	28.628	28.2633	28.7147	28.3722	28.253	28.6277	28.3859	28.8245	28.5245	28.8056	28.9274	28.7651	28.573	28.7178	28.6296	28.6785	28.6959	28.6175	28.5225	28.3789	28.5627	28.3132	28.5531	28.4509	28.7446	28.7933	28.623	28.8309
GSDMD_HUMAN	Gasdermin-D	27.5266	27.2257	27.307	27.5127	27.4481	26.8769	26.6598	27.4068	26.794	27.1932	27.4239	27.5194	27.5444	27.3565	27.6484	27.2524	27.2024	27.1867	27.582	27.6337	27.5699	27.6152	27.2791	27.6193	27.4594	27.3047	27.3389	27.3675	27.3829	27.5817	27.3291	27.0335	27.9838	27.2261	27.6689	27.33	27.2906	27.4099	27.5805	27.388	27.713	27.0694	27.3265	27.1874	27.0902	27.2625	27.4251	27.5871
GSH1_HUMAN	Glutamate--cysteine ligase catalytic subunit	26.7574	26.5952	26.6182	27.352	26.931	26.5769	26.4797	26.8338	NA	27.0297	26.7529	27.2302	NA	26.7223	27.0271	NA	NA	26.5951	27.0737	27.0701	27.3651	27.3463	27.1553	27.1482	27.2955	26.9615	27.4995	26.9141	27.1444	27.2544	26.9493	26.8749	27.3271	27.4788	27.1406	27.1078	26.8385	27.3739	27.3451	27.249	26.8975	26.9409	26.9469	27.3827	26.9575	26.9623	26.717	26.5884
GSHB_HUMAN	Glutathione synthetase	28.1356	28.2818	28.2819	28.706	28.2966	28.255	28.5339	28.3624	27.7294	28.4138	28.3262	28.26	NA	28.1857	28.3505	NA	27.4184	28.1811	28.5863	28.7682	28.5009	28.6858	28.7117	28.4568	28.42	28.4802	28.3386	28.5599	28.1036	28.1955	28.1764	28.4401	28.6069	28.5181	28.4673	28.5652	28.1717	28.3046	28.5507	28.4644	28.1818	28.0976	28.2256	28.3962	28.0651	28.121	28.2822	28.1547
GSHR_HUMAN	Glutathione reductase, mitochondrial	30.4318	30.5511	30.6504	30.604	30.6186	30.527	30.4148	30.5998	30.2828	30.499	30.6563	30.423	30.5016	30.8237	30.679	30.3642	30.5752	30.4991	30.686	30.5762	30.6834	30.6841	30.5898	30.6665	30.796	30.7758	30.9048	30.973	30.8152	30.8367	31.0047	30.8388	30.7416	30.956	30.775	30.8393	30.6571	30.656	30.7189	30.8516	30.7492	30.6465	30.6227	30.6142	31.0462	31.1559	31.0774	30.874
GSLG1_HUMAN	Golgi apparatus protein 1	29.2045	29.1564	28.9454	28.9524	29.1208	29.1768	28.9974	29.0357	29.0917	28.9736	29.3232	29.0128	28.9751	28.984	28.8974	28.9748	29.1235	29.1459	29.1976	29.0486	29.0659	28.8852	28.991	28.9652	29.0332	29.002	28.8446	28.6417	29.008	29.2458	28.9143	28.9519	29.2402	28.8875	29.1163	28.9598	28.8543	29.0328	28.9775	28.8887	29.306	29.0948	29.0976	29.0616	29.0046	28.9908	28.7994	28.8696
GSTK1_HUMAN	Glutathione S-transferase kappa 1	30.5403	30.5896	30.6873	30.6065	30.5736	30.6582	30.5708	30.3823	30.7324	30.4758	30.754	30.5294	30.5096	30.6399	30.4882	30.3816	30.5022	30.6369	30.531	30.3441	30.5797	30.5614	30.6527	30.7449	30.6798	30.5492	30.6783	30.5178	30.7422	30.7224	30.6825	30.6703	30.7004	30.5083	30.4701	30.5884	30.7512	30.6695	30.6243	30.7337	30.565	30.3628	30.5081	30.4523	30.8845	30.633	30.7715	30.7359
GSTM1_HUMAN	Glutathione S-transferase Mu 1	28.0816	28.2343	28.3092	28.5836	28.2019	27.8111	27.9186	28.3125	27.8548	27.9755	28.4304	28.723	27.618	28.3492	28.1293	27.6233	27.8593	27.9105	28.037	28.5253	28.3807	29.2799	28.2272	28.1334	27.7587	27.9293	27.9802	28.2625	27.9131	28.0307	27.9217	28.1096	27.908	27.9185	28.2898	28.263	27.3965	28.4153	28.1981	28.0597	28.1124	28.2557	28.1889	28.1662	27.8457	27.9227	28.5417	27.9196
GSTM3_HUMAN	Glutathione S-transferase Mu 3	28.2529	27.7453	27.9762	27.9414	28.0123	27.979	27.5603	28.2468	27.7835	27.7622	27.477	28.3941	27.9791	28.2519	28.0914	28.2191	28.0261	27.8151	27.8467	27.9819	27.4949	28.175	NA	27.6598	27.9222	27.3022	27.9376	27.8069	27.6253	27.5333	27.9676	27.8653	27.2267	27.9471	27.6359	27.6533	27.379	27.8791	27.8032	27.6384	27.8525	27.7085	27.6769	28.3135	28.181	27.9745	28.4237	27.6818
GSTO1_HUMAN	Glutathione S-transferase omega-1	31.323	31.4606	31.4315	31.4819	31.3696	31.2273	31.4052	31.5028	31.0349	31.2309	31.3035	31.3167	31.2471	31.4385	31.5097	31.3044	31.1851	31.3987	31.3072	31.3694	31.4586	31.5864	31.3724	31.6356	31.385	31.3875	31.5488	31.7218	31.203	31.2755	31.5964	31.3543	31.4512	31.4941	31.5408	31.6505	31.4684	31.4401	31.6431	31.4785	31.4925	31.6876	31.4037	31.3183	31.4686	31.4457	31.6414	31.348
GSTP1_HUMAN	Glutathione S-transferase P	32.8378	32.7573	32.8978	33.0464	32.6184	32.6771	33.15	32.8807	32.7541	32.7616	33.2134	32.7657	32.8777	33.0391	32.722	32.4007	32.6577	32.7201	33.0485	32.8839	32.5975	32.8586	32.6687	32.7555	32.5813	32.7472	32.8483	33.009	32.6481	32.5168	32.7623	32.7763	32.4438	32.6915	32.7534	32.724	32.4347	32.4919	32.7319	32.7288	32.6014	32.8927	32.5681	32.5178	32.58	33.0289	32.8488	32.7994
GT251_HUMAN	Procollagen galactosyltransferase 1	31.7404	31.8544	31.8898	31.7297	31.8609	31.8858	31.8413	31.7975	31.9323	31.9715	31.7474	31.9024	31.7214	31.7707	31.7777	32.029	31.9883	31.8892	31.7025	31.7224	32.1357	31.9153	32.1955	32.1087	32.1442	32.1014	31.9764	31.989	32.0679	32.1101	32.0399	32.0082	32.1216	32.0084	31.9452	31.951	32.1635	32.0779	31.9988	32.0712	31.9686	31.905	32.0108	32.0343	32.2305	31.8795	31.9632	31.8688
GTF2I_HUMAN	General transcription factor II-I	30.9061	30.8964	30.8749	30.54	30.8924	30.9807	30.8412	30.7532	30.8134	30.9231	30.7791	30.8393	30.878	30.9025	30.716	31.0355	30.9293	30.8336	30.973	30.7334	31.049	31.0016	31.1893	30.9879	31.1495	31.111	31.0252	31.1357	31.0935	31.1697	31.1878	31.11	31.0062	30.9117	30.9637	30.7861	31.0448	30.9564	30.9526	31.0187	31.2666	30.9833	31.3664	31.0587	31.1466	31.0044	30.8808	30.7349
GTPB1_HUMAN	GTP-binding protein 1	27.0122	26.804	26.9567	26.8891	26.817	26.8675	NA	26.2468	26.5154	26.6443	26.7594	26.742	26.455	26.7868	26.5577	26.3532	NA	26.3684	26.9304	NA	26.2109	26.4872	26.16	26.9461	26.3446	26.0151	26.1522	26.5127	NA	26.1334	26.7774	NA	25.8203	26.5812	26.3199	26.2599	NA	25.6069	26.4275	25.9959	26.6319	26.7969	26.5735	27.138	26.3714	26.8048	26.5546	27.5238
GTR1_HUMAN	Solute carrier family 2, facilitated glucose transporter member 1	28.7142	28.5873	27.8827	28.8276	28.9967	28.8263	27.3684	27.3631	27.983	28.7468	27.4617	28.4104	28.0894	27.4759	27.3611	28.3186	28.8032	28.5956	27.4301	28.3481	28.1104	28.4069	28.2041	27.9959	27.9448	27.9409	28.7236	28.0692	28.5246	27.974	28.2303	28.1621	28.7167	28.3164	28.4928	28.257	28.6231	28.6991	28.0199	28.2286	27.6707	27.6755	27.7427	28.4918	27.8085	28.1033	27.5203	27.8881
GTR5_HUMAN	Solute carrier family 2, facilitated glucose transporter member 5	27.1639	26.7238	26.9261	26.8681	27.5085	27.0678	27.0002	25.4476	26.8254	26.5986	NA	27.4258	NA	27.0103	NA	27.1034	27.3192	27.1362	26.8503	27.0032	26.7884	26.7676	27.106	27.0289	26.8363	26.9483	26.9937	26.8138	27.7847	27.5892	26.6559	26.6962	27.1215	27.326	27.2541	26.6893	26.7012	27.8321	26.6807	26.8644	27.2171	26.724	26.5278	27.1518	27.1859	27.0324	26.1473	NA
GTSF1_HUMAN	Gametocyte-specific factor 1	NA	27.1987	27.0085	26.2016	27.1937	NA	26.5868	27.1044	26.5616	26.6668	27.0709	26.6063	NA	26.4996	26.9707	NA	26.475	26.7742	27.3209	26.6952	26.7082	26.6375	26.6384	26.7475	26.7203	26.3613	26.6063	26.6102	26.3915	26.5384	26.7405	26.18	26.582	26.6162	26.6845	26.7469	26.5919	26.5787	26.871	26.6564	27.0951	27.1231	26.8721	26.7888	26.8555	26.7817	26.992	27.0544
GUAA_HUMAN	GMP synthase [glutamine-hydrolyzing]	30.0593	30.1494	30.0504	30.2338	29.986	29.9905	30.0849	30.1979	29.9387	29.9963	30.1104	30.0162	30.0735	29.8398	30.2252	29.733	29.8545	30.0263	30.3872	30.1682	30.0965	30.2208	30.0385	30.0545	30.0816	30.2006	30.1756	30.2431	29.8979	29.9396	30.0894	29.8816	30.1214	30.2599	30.1758	30.01	29.7491	29.9931	30.2805	30.1499	29.9821	30.076	29.9002	29.9369	29.9224	30.007	29.9761	29.9323
GYS1_HUMAN	Glycogen [starch] synthase, muscle	26.4871	NA	26.4793	26.6508	NA	NA	26.8299	NA	26.7588	26.0721	26.5036	26.3701	NA	NA	NA	NA	NA	NA	NA	NA	26.5342	26.8282	26.9963	26.4606	26.433	NA	26.5059	26.0529	26.1348	NA	NA	26.2166	27.5546	27.0735	26.3093	NA	26.3556	26.4359	26.189	27.0503	NA	26.9912	26.1162	26.5367	26.8826	NA	26.258	NA
H10_HUMAN	Histone H1.0	29.913	29.955	30.3652	30.2301	29.6451	29.8034	29.7429	30.0574	29.9282	30.2283	30.3708	30.2336	30.2887	30.6554	29.9131	30.2814	29.999	30.2178	30.0774	30.1267	29.9439	29.8238	29.7292	30.0388	30.3289	30.0154	29.3487	30.518	30.1387	30.3573	30.4591	30.0394	29.9022	30.02	29.6765	30.2882	29.6474	30.0833	29.9259	29.9266	29.851	30.0422	30.0816	29.7815	29.6627	29.8788	29.8701	29.856
H14_HUMAN	Histone H1.4	32.0804	32.3514	32.4906	32.2077	31.9159	32.2449	32.1646	32.423	32.1113	32.7093	32.7174	32.5303	32.3691	32.8005	32.3636	32.7946	32.5876	32.2723	32.2547	32.5108	32.0246	32.3006	32.2698	32.4896	32.4412	32.3126	31.5518	32.5703	32.5188	32.452	32.6364	32.4005	32.4769	32.5124	31.5657	32.4377	31.747	32.2788	32.1712	32.3169	32.3128	32.5795	32.3786	32.4104	32.3938	32.7214	32.4893	32.283
H15_HUMAN	Histone H1.5	30.0873	30.4482	30.6809	30.5767	29.9473	30.0488	30.4237	30.5851	30.3127	30.9606	30.9622	30.7123	30.7111	31.0387	30.7358	30.8285	30.8112	30.4643	30.553	30.7819	30.054	30.4018	30.3991	30.5274	30.5962	30.2929	29.6997	30.6205	30.6008	30.5773	30.6526	30.6003	30.5446	30.3525	29.5116	30.3693	29.7117	30.2729	30.3049	30.1294	30.6834	30.5931	30.4308	30.4317	30.4979	30.6073	30.6936	30.3174
H1BP3_HUMAN	HCLS1-binding protein 3	NA	27.1162	26.8602	26.4649	26.4487	26.1041	26.6155	NA	NA	26.3104	26.5644	NA	26.7493	26.907	26.4262	NA	26.0286	26.1525	26.4223	NA	NA	NA	26.5611	26.4683	26.6588	26.3199	NA	26.5985	26.1807	26.1488	26.4357	26.1662	NA	26.4413	26.7848	NA	26.247	26.1313	26.3244	26.4894	26.2851	26.7657	27.0271	26.2247	26.413	26.1929	26.2892	26.2631
H1X_HUMAN	Histone H1x	28.9056	29.0491	29.2386	28.9608	28.9029	28.9776	29.1963	29.1896	29.1622	29.4756	29.1403	29.3038	29.3578	29.5531	29.124	29.3595	29.6151	29.4893	28.9633	29.2493	29.1179	29.2915	28.8829	29.2273	29.2568	29.0674	28.6403	29.2802	29.1067	29.016	29.1582	28.9289	29.138	28.8715	28.8057	29.263	28.9736	29.2187	28.959	28.9817	28.8996	29.347	29.1173	29.2209	29.1609	28.9836	29.2145	29.0429
H2A1C_HUMAN	Histone H2A type 1-C;Histone H2A type 3;Histone H2A type 1-B/E	30.6578	30.9586	30.8135	30.324	30.6406	30.9688	30.6024	30.5276	30.4346	30.8963	30.7543	30.7588	30.5667	30.7453	30.3182	30.9857	30.7115	30.6306	31.0444	30.5965	31.048	31.0337	31.0353	31.2414	30.8627	31.0032	30.4659	30.6795	30.9174	31.0799	31.415	31.0659	30.9937	30.8735	30.9204	31.0818	30.8678	30.7447	31.0445	30.7586	31.481	30.8936	31.0993	31.0601	31.2297	30.9811	31.0292	32.2591
H2A2C_HUMAN	Histone H2A type 2-C;Histone H2A type 2-A	29.3757	27.6328	26.9927	30.1908	30.9655	29.1218	26.2646	28.8641	28.0423	29.0205	26.2314	30.0762	28.4821	28.302	28.1476	28.936	30.5607	29.3395	28.3245	28.1687	30.0264	29.973	30.0192	28.4292	27.1104	29.4032	31.1071	26.9264	30.1739	29.6753	28.7694	28.6646	30.0846	28.4377	30.8686	31.7372	28.8482	30.4526	27.7574	30.0785	26.9016	26.3478	27.0072	29.4748	26.7834	27.1469	26.8152	27.4147
H2AZ_HUMAN	Histone H2A.Z;Histone H2A.V	31.8146	31.2916	31.1427	31.5819	31.5198	31.6466	30.8294	31.2014	31.1764	31.6934	30.772	31.7169	31.24	31.3165	30.9804	31.0965	32.0302	31.4229	31.4189	31.0438	31.6676	31.9134	31.7051	31.3267	31.5395	31.7946	31.8883	31.2453	32.1004	31.9265	31.0999	31.8234	32.0264	31.7403	31.9027	31.8095	31.6138	31.9641	31.6755	31.8698	30.6877	31.287	31.1088	31.3064	31.0474	31.1579	31.3382	31.0764
H2AY_HUMAN	Core histone macro-H2A.1	33.0779	33.1943	33.3323	33.1601	33.3166	33.5953	33.2921	33.2879	33.3259	33.5758	33.5226	33.4832	33.3008	33.4024	32.8734	33.4557	33.4594	33.5244	33.4513	33.2965	33.3024	33.3736	33.302	33.346	33.3755	33.5185	33.5317	33.5106	33.6347	33.6861	33.655	33.6233	33.525	33.2196	33.2548	33.3367	33.467	33.604	33.2904	33.3404	33.6191	33.4974	33.4976	33.4143	33.7978	33.6	33.7959	33.555
H2B2F_HUMAN	Histone H2B type 2-F;Histone H2B type 1-N;Histone H2B type 1-M;Histone H2B type 1-K;Histone H2B type 1-H;Histone H2B type 1-D;Histone H2B type 1-C/E/F/G/I;Histone H2B type F-S;Histone H2B type 1-L	36.1765	36.3243	36.347	36.1763	36.2428	36.5637	36.3666	36.3902	36.2447	36.5485	36.3709	36.4037	36.3428	36.4771	36.3782	36.5454	36.5485	36.4867	36.2712	36.4214	36.4401	36.3972	36.4229	36.3982	36.5878	36.4945	36.2138	36.4613	36.5118	36.4517	36.7007	36.4367	36.4373	36.3612	36.383	36.4938	36.5483	36.4323	36.4109	36.4719	36.4338	36.5439	36.6896	36.4077	36.6369	36.2977	36.4829	36.4575
H31_HUMAN	Histone H3.1;Histone H3.3C	29.5618	28.8678	28.495	29.8251	29.8181	30.1296	27.7127	30.7004	29.3068	30.6563	29.5243	30.9335	30.0579	30.1789	29.3916	29.1019	29.3798	29.9795	29.3129	30.28	31.2347	30.7399	28.5701	29.1235	29.4804	29.0137	28.4769	28.8451	30.4607	30.9482	29.3319	30.6998	30.934	29.4268	31.3284	30.2296	29.6674	30.8612	30.1992	30.8458	29.2348	29.9349	29.2226	30.018	28.8798	28.6886	28.0648	29.6508
H32_HUMAN	Histone H3.2	33.06	33.2562	33.4317	33.2837	33.6575	34.4161	33.9132	34.3504	33.8305	34.82	34.8755	34.6348	34.4279	34.9682	33.1712	34.656	34.663	34.1581	34.1264	34.3022	34.1839	34.2579	33.6758	33.7992	34.0416	34.4196	33.6528	34.6016	34.7524	34.7478	34.6646	34.8707	34.5889	33.6694	34.7337	34.2175	34.0698	34.7127	34.5176	34.5807	34.7578	33.9947	33.4637	33.5591	34.4399	34.5598	34.5943	34.5442
H33_HUMAN	Histone H3.3	30.5582	29.6098	30.182	30.4452	30.6661	31.3294	28.8872	31.1706	30.7459	31.2747	30.3322	31.5881	32.0935	31.3102	30.6623	30.3805	31.1571	30.7598	30.7854	31.3046	31.0079	31.0148	31.0429	31.193	32.0827	30.8444	30.2692	30.4652	31.0932	31.6998	30.4847	31.4235	31.8116	31.6792	31.393	30.6969	30.3619	31.5275	30.9348	31.5808	30.5358	30.6413	30.6139	30.5237	30.3447	30.5057	29.7498	30.2574
H4_HUMAN	Histone H4	34.2593	34.3787	34.813	34.534	34.9945	35.5935	35.151	35.2403	34.9462	35.5942	35.8597	35.717	35.5554	35.8329	33.9747	35.2063	35.2736	34.8791	35.5066	35.4779	35.0215	35.1718	34.5755	34.9085	35.4	35.5303	34.7913	35.2144	35.4807	35.5326	35.4369	35.7481	35.9853	34.6205	35.503	35.0506	34.8243	35.6218	35.2051	35.3816	35.9024	35.3207	34.6909	34.8602	35.5283	35.8105	35.3746	35.8075
H90B2_HUMAN	Putative heat shock protein HSP 90-beta 2	31.9388	31.6458	29.9932	32.1532	32.0088	31.442	30.5839	32.2155	32.0154	31.921	31.1594	32.1559	32.2197	30.3319	31.746	31.4109	31.4814	31.8726	31.5	31.9525	32.2381	32.2014	31.9799	31.1379	32.0437	32.0241	32.12	30.7009	31.9945	32.0934	NA	31.2574	32.3563	31.9754	32.1406	32.3472	31.644	31.9898	31.8696	32.294	30.0398	32.3708	30.8627	32.1945	29.7867	29.4888	30.8326	29.6257
HACD3_HUMAN	Very-long-chain (3R)-3-hydroxyacyl-CoA dehydratase 3	26.9365	NA	26.1509	27.1156	NA	28.0535	27.2649	27.6309	27.3153	NA	26.9351	27.7904	27.673	27.291	NA	NA	27.1061	27.2817	27.5998	26.9813	27.9548	27.5784	27.6508	27.6058	27.4596	28.0033	27.5968	27.6244	27.5724	25.799	27.5813	28.2714	28.0805	27.5611	28.1552	27.8377	27.8096	NA	27.4668	27.7234	27.6375	26.8327	27.1602	NA	27.6612	27.4096	26.9765	27.5008
HAP28_HUMAN	28 kDa heat- and acid-stable phosphoprotein	27.6713	27.8913	28.0409	28.028	27.8289	27.7607	28.1486	27.1429	27.535	27.7653	27.9616	27.411	NA	27.4447	28.079	28.1793	27.7016	27.7252	28.2817	28.1526	28.0995	28.0321	28.1103	28.1683	27.9248	27.952	27.9781	28.0772	27.9176	27.8018	28.1039	27.9053	27.8107	28.0821	28.1158	27.9349	27.9012	27.5834	28.11	27.6636	28.0923	28.2619	27.9233	27.9648	28.0154	27.7708	27.881	28.0432
HAT1_HUMAN	Histone acetyltransferase type B catalytic subunit	29.3348	29.2485	29.112	29.317	29.1926	29.1862	28.9505	29.3209	29.1292	29.1498	29.0292	29.1625	29.2175	28.7205	29.3548	28.9236	28.9336	29.2513	29.2632	29.2705	29.4113	29.5208	29.3799	29.5184	29.5727	29.0823	29.5691	29.3432	29.4106	29.392	29.6096	29.4565	29.2889	29.7083	29.0747	29.5744	29.0355	29.4634	29.4504	29.4325	29.6101	29.4463	29.2738	29.5599	29.1956	29.031	29.3061	28.9374
HAX1_HUMAN	HCLS1-associated protein X-1	26.518	26.9061	26.8937	26.4636	26.9697	26.8657	27.0457	26.8335	26.7172	26.6505	26.3346	26.4599	26.7784	26.7871	NA	26.1573	26.8434	26.6328	26.6559	26.4064	26.9702	26.823	26.6057	27.4415	27.0098	27.061	26.5916	27.0023	26.8401	27.1373	27.9311	27.3319	26.7218	26.9404	26.8407	26.7083	26.8576	27.0741	26.8109	26.9892	26.3463	26.8876	26.6502	26.7981	26.7881	27.2037	26.7264	27.3429
HBS1L_HUMAN	HBS1-like protein	26.9072	26.3894	27.3953	26.8326	26.361	NA	NA	27.538	26.6716	26.8417	NA	26.1056	NA	26.907	26.7174	NA	26.0117	26.3706	26.9205	26.3247	26.8691	27.1029	27.0936	27.0605	27.2168	27.015	27.175	NA	27.0396	27.0413	NA	26.6954	26.6352	27.2324	26.8375	27.0895	26.9445	27.0906	26.9483	27.1919	26.6199	27.1606	26.7613	26.8073	27.1912	27.0032	27.1638	27.2195
HCD2_HUMAN	3-hydroxyacyl-CoA dehydrogenase type-2	31.7818	31.654	31.8997	31.6041	31.9235	32.1287	31.8798	31.9201	32.1943	32.0005	32.0491	31.8294	31.839	32.0034	31.8067	31.7195	31.9564	31.9935	32.0018	31.6683	31.8854	31.5627	31.5438	31.8894	31.8154	32.0118	31.8736	32.048	32.0393	31.9144	32.1329	31.9863	32.0071	31.8569	32.0129	31.9603	32.138	31.9851	31.847	31.9591	31.8326	31.5684	31.6533	31.4996	32.0714	32.3459	32.1425	32.1196
HCDH_HUMAN	Hydroxyacyl-coenzyme A dehydrogenase, mitochondrial	32.4526	32.3623	32.5846	32.4865	32.5247	32.8506	32.6823	32.5243	32.923	32.5753	32.6264	32.4631	32.6325	32.716	32.3451	32.5458	32.6262	32.5171	32.5655	32.3479	32.6159	32.6023	32.4029	32.8672	32.777	32.9051	32.5839	32.8044	32.7231	32.843	32.8687	33.0557	32.9814	32.75	32.7556	32.713	33.0016	32.7808	32.688	32.8312	32.58	32.4176	32.2365	32.2293	32.7993	32.9044	32.7742	32.6959
HCFC1_HUMAN	Host cell factor 1	31.0174	31.3195	31.143	30.9147	31.0388	31.0776	31.3969	30.9522	31.1952	31.1988	30.8278	30.9862	30.9672	31.0651	31.01	30.9778	31.1907	31.0694	31.1932	30.8641	31.0449	30.8829	31.1161	31.0515	31.1673	31.2706	31.0579	31.1164	31.2149	31.2348	31.3026	31.2586	31.0044	31.104	30.811	30.8974	31.2828	31.1506	30.9183	31.0669	30.9209	31.0001	31.1599	31.061	31.3466	31.3532	31.2669	31.2315
HCLS1_HUMAN	Hematopoietic lineage cell-specific protein	31.5309	31.6435	31.6732	31.5578	31.4699	31.3883	31.6347	31.3532	31.4522	31.4501	31.5773	31.3834	31.3655	31.6082	31.7348	31.7425	31.4579	31.403	31.5674	31.6269	31.477	31.5365	31.5942	31.5034	31.4007	31.5233	31.5896	31.6261	31.3004	31.4241	31.6571	31.4005	31.4064	31.7117	31.4337	31.5845	31.4466	31.5385	31.574	31.5256	31.679	31.7458	31.634	31.6821	31.4755	31.5477	31.6993	31.3822
HD_HUMAN	Huntingtin	27.0654	26.5709	26.218	26.6867	26.756	26.8497	26.0131	26.8286	26.6461	26.6935	26.7361	26.4218	26.7672	26.4773	27.2169	25.724	26.1408	26.3846	27.1352	26.9903	27.0882	27.0158	27.9154	25.6823	27.0961	26.6196	27.0412	26.5443	26.897	25.967	NA	26.041	27.5372	27.2779	27.0897	25.9743	26.1924	27.0108	26.8192	26.9308	25.3807	26.5108	26.5021	27.5633	25.8151	27.3349	25.8305	25.5087
HDAC1_HUMAN	Histone deacetylase 1	30.4421	30.3181	30.3817	30.3686	30.4729	30.4823	30.367	30.1394	30.5337	30.4907	30.2719	30.4621	30.3667	29.986	30.2721	30.7113	30.436	30.3694	30.2674	30.3661	30.691	30.4574	30.6903	30.6191	30.8648	30.6944	30.7983	30.344	30.5941	30.6165	30.5535	30.61	30.6522	30.5046	30.4823	30.5223	30.6181	30.7167	30.4509	30.6447	30.6538	30.6343	30.9163	30.6627	31.1004	30.579	30.5996	30.501
HDAC2_HUMAN	Histone deacetylase 2	29.1189	29.2307	29.0242	29.1104	29.2335	29.3129	29.2936	29.2819	29.3842	29.0633	29.3934	29.0196	29.0307	29.2461	28.8764	29.2439	29.1454	29.6618	29.0865	29.5003	29.2389	29.1913	29.3528	29.4218	29.5325	29.5039	29.1488	29.2865	29.3415	29.4107	29.043	29.2294	29.2498	29.1333	29.2563	29.1657	29.3353	29.2556	29.0534	29.4206	29.2961	29.0622	29.2021	29.3473	29.069	29.3753	28.8595	28.8793
HDGF_HUMAN	Hepatoma-derived growth factor	31.3624	31.4161	31.3558	31.5771	31.3722	30.9305	31.3067	31.1413	31.2317	31.3442	31.4399	31.3038	31.1317	31.3192	31.3679	31.1836	31.2152	31.31	31.543	31.3642	31.403	31.4702	31.3735	31.3187	31.4759	31.365	31.5184	31.4287	31.1998	31.2779	31.5552	31.3994	31.3379	31.5098	31.4197	31.4052	31.2595	31.3803	31.5151	31.3731	31.6024	31.6244	31.6291	31.494	31.6715	31.4649	31.6858	31.5661
HDGR2_HUMAN	Hepatoma-derived growth factor-related protein 2	28.3782	28.5844	28.1307	28.3857	28.0329	27.557	28.6667	27.9327	28.3914	28.4351	28.3964	NA	27.4939	27.8282	28.0675	28.3027	28.2512	27.9072	28.0543	28.5603	28.105	28.1204	28.1899	27.8646	28.0255	27.8658	27.849	28.0052	28.255	28.3156	28.3396	28.2346	27.761	28.1718	28.0401	28.1062	28.2775	28.0026	28.2088	28.3265	28.593	27.9633	28.2331	28.3035	28.2868	27.9215	28.715	28.4375
HDHD1_HUMAN	Pseudouridine-5-phosphatase	26.579	25.3763	NA	26.3051	25.883	NA	26.3892	NA	26.3445	26.2631	NA	NA	NA	26.2492	NA	25.99	26.025	26.4861	NA	NA	NA	26.1079	26.4878	26.8796	26.32	25.9655	NA	25.888	26.164	25.8696	26.8235	25.9891	25.9854	26.8514	26.4507	NA	26.3997	26.1662	26.5428	NA	26.1134	26.5411	26.5906	NA	NA	NA	26.5303	NA
HDHD2_HUMAN	Haloacid dehalogenase-like hydrolase domain-containing protein 2	26.5146	27.0317	27.4059	26.9286	26.7817	26.9999	27.2469	27.1793	26.8153	26.6741	26.8197	26.6942	27.4265	27.5796	26.9974	NA	NA	26.6853	26.7385	27.283	27.0745	27.3703	27.1576	27.3808	26.971	27.2221	27.0119	27.1478	27.0952	26.7792	27.0794	27.1648	26.9242	27.0587	27.3463	27.226	26.8617	26.9109	27.1592	27.0632	27.6102	26.6296	26.9844	26.3899	27.0944	26.9691	26.7378	26.3314
HEAT1_HUMAN	HEAT repeat-containing protein 1	30.1808	30.0869	29.9411	30.0861	30.3063	30.2373	30.0458	30.3831	30.4524	30.2341	29.9304	30.1797	30.446	30.061	30.2486	29.8541	30.2955	30.3362	29.8525	30.0765	30.2368	30.1424	30.3217	30.1628	30.3501	30.4092	30.1975	29.9905	30.2391	30.4411	29.9173	30.1904	30.3181	30.292	30.4093	30.1278	30.2162	30.362	30.1396	30.249	29.7355	29.8852	30.063	30.276	29.8227	30.0157	29.5292	30.0192
HEAT3_HUMAN	HEAT repeat-containing protein 3	26.6029	26.8323	26.7574	26.58	26.3722	26.3802	26.7918	26.8454	26.6707	26.5058	26.6757	26.5796	26.6668	27.252	27.2113	NA	26.5831	26.3315	27.1793	26.518	26.7934	27.1342	27.1644	26.8902	26.4631	26.7199	26.5629	26.8259	26.2648	26.6554	26.4167	26.5335	26.7425	26.9866	26.5884	26.9344	26.5458	26.5809	26.8578	27.0113	26.9317	26.7585	27.1527	26.805	26.1129	26.5515	26.3098	26.6713
HEBP1_HUMAN	Heme-binding protein 1	NA	NA	27.5873	28.1261	27.5192	27.5721	27.9121	NA	27.5847	27.5488	27.8202	27.5129	27.6761	27.7406	27.5709	27.6634	27.6591	NA	27.582	27.9522	27.8021	27.8144	27.6476	27.9927	27.9317	27.816	27.8978	27.1413	27.8432	27.6169	27.9543	28.1543	27.6521	28	27.7884	28.638	28.276	27.7511	28.7601	NA	27.8191	27.8893	27.3077	27.7573	28.3539	27.9739	27.6945	27.3729
HEBP2_HUMAN	Heme-binding protein 2	27.3094	27.6585	27.5981	27.5215	27.728	27.4395	28.3572	28.0702	27.1059	27.4991	27.9873	27.3781	27.3987	27.6331	27.4404	27.6514	27.2057	27.1389	27.8217	27.6726	NA	28.0267	27.686	27.1292	NA	NA	NA	27.6978	NA	27.4106	27.7526	NA	27.4322	27.3832	27.6954	26.9062	27.2042	NA	NA	NA	27.5971	27.9652	28.2519	27.3111	27.8954	27.8646	27.7136	27.4917
HEM2_HUMAN	Delta-aminolevulinic acid dehydratase	27.2493	27.7677	27.2374	27.2154	NA	27.3002	27.3662	NA	NA	NA	27.1174	NA	NA	27.358	NA	NA	NA	27.3446	27.5741	27.1342	NA	27.6557	NA	27.1768	NA	NA	NA	NA	NA	NA	NA	NA	27.4399	NA	27.2938	NA	NA	NA	27.029	NA	NA	27.1126	NA	27.3277	NA	27.6252	26.7335	NA
HEM3_HUMAN	Porphobilinogen deaminase	27.8921	28.0819	27.8025	27.7862	27.9021	27.8669	28.027	28.2934	27.8442	28.1091	28.5874	27.7228	28.1497	27.9961	28.3327	27.807	27.6877	27.6158	28.2996	28.165	27.9102	28.6952	27.8733	27.9786	27.6647	28.3943	27.7602	28.2665	27.9269	27.913	27.7466	27.7997	28.3574	28.2908	28.1424	28.1075	27.4395	28.0226	28.2486	27.8863	27.9317	27.6353	27.6755	27.9987	27.392	27.8881	28.6254	28.264
HEM6_HUMAN	Oxygen-dependent coproporphyrinogen-III oxidase, mitochondrial	28.2329	28.318	28.1442	28.0384	28.4338	28.5079	28.3256	28.1598	28.1717	28.3124	28.0191	28.1733	28.6309	27.8738	27.9929	NA	27.8773	28.2642	28.2844	28.2295	28.63	28.1582	28.4775	28.4631	28.6952	28.1846	28.3325	27.8128	28.0611	28.2944	28.4004	28.7853	28.6724	28.3279	28.1026	28.0291	28.058	28.0958	28.1789	28.4338	27.8602	27.7266	27.694	27.9437	28.1004	27.4554	27.7596	NA
HERC4_HUMAN	Probable E3 ubiquitin-protein ligase HERC4	24.5416	25.2894	25.3068	25.9896	NA	NA	25.5806	25.5671	25.3856	25.501	NA	25.3329	25.5008	25.2131	25.5502	NA	NA	24.7957	25.0739	NA	25.9026	26.141	26.1116	NA	25.6694	25.525	26.121	NA	25.0108	NA	NA	NA	NA	26.0377	25.9935	NA	NA	25.562	25.879	25.4557	24.5624	25.1583	NA	25.4008	25.6269	24.8182	24.553	NA
HEXA_HUMAN	Beta-hexosaminidase subunit alpha	28.9607	29.0459	29.0539	28.8972	29.2929	29.0814	29.1276	28.8678	28.9667	29.1212	28.8211	28.9912	29.0622	29.1011	28.9333	28.8042	29.0589	29.1404	29.0397	29.0795	29.3218	28.9567	29.3797	29.2434	29.2157	29.1283	29.3324	29.0176	29.3837	29.3058	29.4308	29.2301	29.0665	28.9415	29.5052	29.4709	29.3665	29.2792	29.2721	29.4011	29.462	29.052	29.2877	29.4855	29.1747	29.068	28.8206	28.4722
HEXB_HUMAN	Beta-hexosaminidase subunit beta	31.5223	31.8096	31.819	31.5465	31.7454	31.564	31.7096	31.4206	31.792	31.5472	31.7652	31.6296	31.4449	31.6761	31.463	31.5966	31.6728	31.6279	31.7392	31.5275	31.7185	31.6037	31.7727	31.6839	31.7286	31.6782	31.6068	31.7031	31.6717	31.6334	31.8681	31.7257	31.6888	31.8376	31.485	31.7297	31.7142	31.7137	31.677	31.7142	31.6975	31.4549	31.7614	31.7682	31.8603	31.6651	31.5552	31.6394
HGS_HUMAN	Hepatocyte growth factor-regulated tyrosine kinase substrate	28.1441	27.6643	27.4348	28.351	27.973	27.4803	27.8863	28.385	27.9189	28.1413	27.383	28.2671	27.7408	28.0205	27.9644	28.2148	28.1944	28.158	28.2379	28.5015	28.2555	28.0683	28.5047	27.366	28.3722	28.3174	28.2798	28.0974	28.4314	28.6994	27.6748	27.7655	28.9713	28.2202	28.345	28.6236	28.0614	28.6128	28.3755	28.5875	28.0702	27.9772	27.7704	28.152	28.098	26.7588	26.6584	28.3413
HIBCH_HUMAN	3-hydroxyisobutyryl-CoA hydrolase, mitochondrial	27.2236	27.1707	27.5575	27.3413	27.8342	27.6396	NA	28.1392	27.1567	NA	27.144	27.7384	27.4667	NA	NA	27.5199	27.7334	27.5444	27.8887	27.7282	28.1143	27.5114	27.9184	27.8145	27.7016	27.8614	27.7189	27.5128	27.9746	27.8591	27.781	27.6763	27.9727	NA	27.8096	27.4675	27.7998	28.0139	27.7331	27.7377	27.3203	27.2353	27.1232	27.4257	27.6743	27.5836	27.7884	27.4002
HIG1A_HUMAN	HIG1 domain family member 1A, mitochondrial	24.9478	24.2487	24.7608	NA	24.1749	25.3706	23.6008	25.4907	25.5747	26.1509	24.9498	25.3034	24.6506	25.1473	NA	24.217	26.6824	25.7657	26.2383	26.2311	27.5454	27.294	27.287	27.0883	29.1358	27.3762	27.4812	27.4936	27.4713	27.6165	27.3926	27.4966	28.0698	27.6115	27.7787	26.7338	27.3974	27.8911	27.4567	27.0932	26.2738	26.6005	25.7478	25.9131	26.8901	28.2422	26.6937	26.7007
HIG2A_HUMAN	HIG1 domain family member 2A, mitochondrial	28.5469	28.1081	28.0942	28.4992	28.5442	28.3558	27.7842	28.0172	28.2386	28.2253	27.6315	28.5314	27.7969	28.5323	28.1956	28.2405	28.4387	28.3616	27.7998	28.5693	28.3093	28.2896	27.8971	27.9808	28.8958	28.4929	28.6056	27.9397	28.6158	28.4478	27.6591	28.2365	28.4333	28.5386	28.2507	28.1467	28.4458	28.4268	28.0169	28.4006	26.9834	27.2751	27.3869	27.91	27.8856	27.4743	27.3531	27.7302
HINT1_HUMAN	Histidine triad nucleotide-binding protein 1	30.8912	30.9399	30.2569	31.0137	30.8958	30.5352	30.8276	31.0925	30.8572	30.7866	30.6205	31.0732	31.0451	30.7566	30.7832	30.602	30.5249	30.652	30.7686	30.9001	31.3239	31.1625	31.1344	30.7022	31.0889	31.1281	31.3652	31.058	30.9971	31.1338	30.5129	30.9636	31.2629	31.3529	31.3993	31.5941	30.9677	31.2847	31.4088	31.2662	30.8176	31.2647	30.4414	31.1248	30.2309	30.4374	30.6081	30.6735
HINT2_HUMAN	Histidine triad nucleotide-binding protein 2, mitochondrial	29.374	29.5641	29.5226	29.4296	29.679	29.8314	29.7469	29.2902	29.7893	29.8611	29.804	29.72	29.5252	29.6083	29.3928	29.9258	29.7238	29.4819	29.676	29.3926	29.8367	29.821	29.6939	29.8171	29.8655	30.0142	30.1394	29.8812	30.0215	29.9231	30.2191	30.0428	30.0295	29.7924	29.7437	29.7573	30.1044	29.9225	29.7287	29.8131	29.7221	29.762	29.5669	29.6873	29.9701	29.9221	30.062	29.9063
HM13_HUMAN	Minor histocompatibility antigen H13	30.0267	29.9844	30.0451	29.7834	29.8001	30.5104	30.0664	29.9575	30.0068	30.2704	30.3272	30.1128	30.1705	30.4032	29.8532	30.2245	30.1314	30.0798	30.1671	29.9702	29.9537	29.8295	29.8127	30.0728	30.1021	29.9271	29.587	30.0592	30.0628	29.9562	29.9969	30.2559	30.3207	29.7363	30.0817	29.6925	29.8809	29.9653	30.0048	30.1425	30.8291	30.0349	30.1465	30.0389	30.8614	30.4421	30.5169	30.4583
HMCS1_HUMAN	Hydroxymethylglutaryl-CoA synthase, cytoplasmic	27.3577	27.9001	27.5534	27.7828	27.5672	27.5401	28.0644	28.3483	27.6214	27.8284	28.0874	27.7172	27.954	27.4597	28.0114	27.675	27.4952	27.487	28.3991	27.6188	27.8613	27.8321	27.8336	27.9027	27.6878	27.6503	28.1593	27.7172	NA	NA	27.5023	27.8367	27.9416	27.5381	27.6473	27.8717	27.4262	27.5794	27.8488	27.6915	28.0037	27.8538	27.143	27.1679	28.5072	27.7982	28.2777	27.8314
HMGA1_HUMAN	High mobility group protein HMG-I/HMG-Y	31.3982	31.6606	31.556	31.7087	31.2651	31.5937	31.5431	31.5277	31.6209	31.4556	31.701	31.2688	31.2023	31.2812	31.226	31.7174	31.6323	31.3941	31.5428	31.2578	31.6128	31.577	31.7713	31.5453	31.4318	31.6273	31.609	31.8287	31.8394	31.6645	31.3998	31.5138	31.7302	31.6154	31.4633	31.546	31.6498	31.6472	31.5806	31.6217	31.7242	31.9717	31.5887	31.8706	31.3356	31.8062	31.9812	31.4794
HMGB1_HUMAN	High mobility group protein B1	32.1367	32.2196	31.975	32.175	32.1451	32.0458	32.1795	32.2284	32.1754	32.2242	32.3474	32.1305	32.0085	32.0033	32.2858	32.4435	32.2586	32.0348	31.9803	32.1678	32.4372	32.4644	32.4792	32.3038	32.3282	32.3353	32.5974	32.4421	32.3671	32.5412	32.0268	32.2373	32.3342	32.4408	32.3643	32.5087	31.9846	32.36	32.1621	32.2529	32.4845	32.7575	32.3699	32.5486	32.1973	32.3865	32.4463	31.9963
HMGB2_HUMAN	High mobility group protein B2	30.5688	30.4506	30.2904	30.3689	30.4526	30.3296	30.7026	30.515	29.997	30.4779	30.5407	30.3767	30.33	30.5697	30.5857	30.5292	30.4511	30.4852	30.3518	30.6754	30.6637	30.8915	30.8019	30.4828	30.3721	30.6583	30.8815	30.851	30.5981	30.7079	30.7938	30.5084	30.6931	30.8929	30.7495	30.7598	30.3363	30.6703	30.6235	30.6504	30.7972	30.8883	30.6138	30.7576	30.5305	30.2257	30.7894	30.488
HMGB3_HUMAN	High mobility group protein B3	27.6728	27.6076	28.1078	27.8826	27.747	27.039	27.9271	28.1419	27.2344	27.5222	27.8402	27.8307	27.1256	27.6887	27.4628	27.309	NA	27.5828	27.896	27.7477	27.9502	27.6812	27.7954	27.4668	27.6408	27.521	28.113	27.9407	27.7755	27.7248	27.9064	27.1144	27.6353	NA	27.5549	28.4038	26.9632	27.8558	27.6352	27.4376	27.7511	27.5188	27.9649	27.7713	27.1881	NA	NA	NA
HMGCL_HUMAN	Hydroxymethylglutaryl-CoA lyase, mitochondrial	29.5704	29.6888	29.7953	29.5855	29.6347	30.0797	29.9997	29.7752	30.0001	29.9974	29.9644	29.6698	29.7604	29.753	29.6461	29.5389	29.6598	29.8671	29.5831	29.7628	29.7381	29.6455	29.7837	29.855	29.8529	29.9924	29.5563	29.6843	29.982	29.8998	29.9056	30.023	30.016	29.7794	29.8864	29.9463	29.9099	29.8118	29.7141	29.9174	29.7463	29.6885	29.3651	29.5028	30.1878	29.8231	29.9459	29.7664
[truncated: 1,728 more rows]
[truncated: 68 more columns]
